# Supplementary material for: Potential mechanism prediction of Cold-Damp Plague Formula against COVID-19 via network pharmacology analysis and molecular docking
Source: Chin Med. 2020 Jul 30;15:78. doi: 10.1186/s13020-020-00360-8 (PMC7391051; doi:10.1186/s13020-020-00360-8)
Supplement: Supplementary file 5 — Additional file 5: Table S4. Candidate targets of COVID-19. [file 13020_2020_360_MOESM5_ESM.xlsx]

## Sheet: GeneCards-SearchResults
Table S4. Candidate targets of COVID-19
Gene Symbol	Protein name	Uniprot ID
MBL2	Mannose Binding Lectin 2	P11226
HLA-B	Major Histocompatibility Complex, Class I, B	P01889
TNF	Tumor Necrosis Factor	P01375
MASP2	Mannan Binding Lectin Serine Peptidase 2	O00187
IL6	Interleukin 6	P05231
CXCL8	C-X-C Motif Chemokine Ligand 8	P10145
CD40LG	CD40 Ligand	P29965
CCL2	C-C Motif Chemokine Ligand 2	P13500
IL10	Interleukin 10	P22301
IFNG	Interferon Gamma	P01579
CRP	C-Reactive Protein	P02741
ACE2	Angiotensin I Converting Enzyme 2	Q9BYF1
CASP3	Caspase 3	P42574
STAT1	Signal Transducer And Activator Of Transcription 1	P42224
DPP4	Dipeptidyl Peptidase 4	P27487
TMPRSS2	Transmembrane Serine Protease 2	O15393
TP53	Tumor Protein P53	P04637
HLA-C	Major Histocompatibility Complex, Class I, C	P10321
CLEC4M	C-Type Lectin Domain Family 4 Member M	Q9H2X3
MCL1	MCL1 Apoptosis Regulator, BCL2 Family Member	Q07820
MX1	MX Dynamin Like GTPase 1	P20591
CASP6	Caspase 6	P55212
IL2	Interleukin 2	P60568
CCL5	C-C Motif Chemokine Ligand 5	P13501
IFNA1	Interferon Alpha 1	P01562
BAK1	BCL2 Antagonist/Killer 1	Q16611
EGFR	Epidermal Growth Factor Receptor	P00533
IFNL1	Interferon Lambda 1	Q8IU54
PRSS2	Serine Protease 2	P07478
CXCL10	C-X-C Motif Chemokine Ligand 10	P02778
SOCS3	Suppressor Of Cytokine Signaling 3	O14543
SPIDR	Scaffold Protein Involved In DNA Repair	Q14159
TGFB1	Transforming Growth Factor Beta 1	P01137
POLD1	DNA Polymerase Delta 1, Catalytic Subunit	P28340
IFNAR1	Interferon Alpha And Beta Receptor Subunit 1	P17181
IL1B	Interleukin 1 Beta	P01584
CSF2	Colony Stimulating Factor 2	P04141
PPARG	Peroxisome Proliferator Activated Receptor Gamma	P37231
CCR5	C-C Motif Chemokine Receptor 5 (Gene/Pseudogene)	P51681
CXCL9	C-X-C Motif Chemokine Ligand 9	Q07325
GPT	Glutamic--Pyruvic Transaminase	P24298
MAPK1	Mitogen-Activated Protein Kinase 1	P28482
IFNB1	Interferon Beta 1	P01574
ALB	Albumin	P02768
FGF2	Fibroblast Growth Factor 2	P09038
SFTPD	Surfactant Protein D	P35247
CXCR3	C-X-C Motif Chemokine Receptor 3	P49682
IL4	Interleukin 4	P05112
CD79A	CD79a Molecule	P11912
IRF3	Interferon Regulatory Factor 3	Q14653
ACE	Angiotensin I Converting Enzyme	P12821
CXCL2	C-X-C Motif Chemokine Ligand 2	P19875
ICAM1	Intercellular Adhesion Molecule 1	P05362
MAPK3	Mitogen-Activated Protein Kinase 3	P27361
IL17A	Interleukin 17A	Q16552
IL5	Interleukin 5	P05113
CCL3	C-C Motif Chemokine Ligand 3	P10147
IL13	Interleukin 13	P35225
MAPK8	Mitogen-Activated Protein Kinase 8	P45983
TTR	Transthyretin	P02766
CTSL	Cathepsin L	P07711
IL18	Interleukin 18	Q14116
ANPEP	Alanyl Aminopeptidase, Membrane	P15144
PIK3R1	Phosphoinositide-3-Kinase Regulatory Subunit 1	P27986
CD209	CD209 Molecule	Q9NNX6
DDX58	DExD/H-Box Helicase 58	O95786
FURIN	Furin, Paired Basic Amino Acid Cleaving Enzyme	P09958
ADA	Adenosine Deaminase	P00813
APOE	Apolipoprotein E	P02649
MAPK14	Mitogen-Activated Protein Kinase 14	Q16539
NFKB1	Nuclear Factor Kappa B Subunit 1	P19838
HLA-A	Major Histocompatibility Complex, Class I, A	P04439
SERPINE1	Serpin Family E Member 1	P05121
PIK3CA	Phosphatidylinositol-4,5-Bisphosphate 3-Kinase Catalytic Subunit Alpha	P42336
PTGS2	Prostaglandin-Endoperoxide Synthase 2	P35354
CD14	CD14 Molecule	P08571
IFIH1	Interferon Induced With Helicase C Domain 1	Q9BYX4
BCL2	BCL2 Apoptosis Regulator	P10415
HSPA5	Heat Shock Protein Family A (Hsp70) Member 5	P11021
FCGR2A	Fc Fragment Of IgG Receptor IIa	P12318
CDK4	Cyclin Dependent Kinase 4	P11802
BAX	BCL2 Associated X, Apoptosis Regulator	Q07812
CCL11	C-C Motif Chemokine Ligand 11	P51671
CAT	Catalase	P04040
HMOX1	Heme Oxygenase 1	P09601
SOD1	Superoxide Dismutase 1	P00441
G6PD	Glucose-6-Phosphate Dehydrogenase	P11413
CTRL	Chymotrypsin Like	P40313
CD4	CD4 Molecule	P01730
DEFB4A	Defensin Beta 4A	O15263
TF	Transferrin	P02787
IL1A	Interleukin 1 Alpha	P01583
PIK3C2A	Phosphatidylinositol-4-Phosphate 3-Kinase Catalytic Subunit Type 2 Alpha	O00443
PARP1	Poly(ADP-Ribose) Polymerase 1	P09874
RELA	RELA Proto-Oncogene, NF-KB Subunit	Q04206
NOS2	Nitric Oxide Synthase 2	P35228
EIF2AK2	Eukaryotic Translation Initiation Factor 2 Alpha Kinase 2	P19525
GAPDH	Glyceraldehyde-3-Phosphate Dehydrogenase	P04406
TRAF6	TNF Receptor Associated Factor 6	Q9Y4K3
NOS3	Nitric Oxide Synthase 3	P29474
CTSB	Cathepsin B	P07858
CCL4	C-C Motif Chemokine Ligand 4	P13236
ANXA5	Annexin A5	P08758
CASP8	Caspase 8	Q14790
F8	Coagulation Factor VIII	P00451
SH2D3A	SH2 Domain Containing 3A	Q9BRG2
CREB1	CAMP Responsive Element Binding Protein 1	P16220
HLA-DRB1	Major Histocompatibility Complex, Class II, DR Beta 1	P01911
TMPRSS11D	Transmembrane Serine Protease 11D	O60235
BMP6	Bone Morphogenetic Protein 6	P22004
SMAD3	SMAD Family Member 3	P84022
IFITM3	Interferon Induced Transmembrane Protein 3	Q01628
BAD	BCL2 Associated Agonist Of Cell Death	Q92934
CANX	Calnexin	P27824
CCL7	C-C Motif Chemokine Ligand 7	P80098
EGR1	Early Growth Response 1	P18146
ITGB1	Integrin Subunit Beta 1	P05556
RNASE3	Ribonuclease A Family Member 3	P12724
STING1	Stimulator Of Interferon Response CGAMP Interactor 1	Q86WV6
CD34	CD34 Molecule	P28906
DUSP1	Dual Specificity Phosphatase 1	P28562
ADAM17	ADAM Metallopeptidase Domain 17	P78536
RB1	RB Transcriptional Corepressor 1	P06400
HSPB1	Heat Shock Protein Family B (Small) Member 1	P04792
EEF1A1	Eukaryotic Translation Elongation Factor 1 Alpha 1	P68104
TOLLIP	Toll Interacting Protein	Q9H0E2
CCR1	C-C Motif Chemokine Receptor 1	P32246
LCN2	Lipocalin 2	P80188
EZR	Ezrin	P15311
TRAF3	TNF Receptor Associated Factor 3	Q13114
ICAM3	Intercellular Adhesion Molecule 3	P32942
SMAD7	SMAD Family Member 7	O15105
TXN	Thioredoxin	P10599
VCP	Valosin Containing Protein	P55072
NLRP12	NLR Family Pyrin Domain Containing 12	P59046
ANXA2	Annexin A2	P07355
ITGAL	Integrin Subunit Alpha L	P20701
STAT6	Signal Transducer And Activator Of Transcription 6	P42226
PIK3CG	Phosphatidylinositol-4,5-Bisphosphate 3-Kinase Catalytic Subunit Gamma	P48736
FOS	Fos Proto-Oncogene, AP-1 Transcription Factor Subunit	P01100
HELLS	Helicase, Lymphoid Specific	Q9NRZ9
CP	Ceruloplasmin	P00450
APOA1	Apolipoprotein A1	P02647
RPS27A	Ribosomal Protein S27a	P62979
CREBBP	CREB Binding Protein	Q92793
PLA2G4A	Phospholipase A2 Group IVA	P47712
LMAN1	Lectin, Mannose Binding 1	P49257
CEACAM5	CEA Cell Adhesion Molecule 5	P06731
PRKCA	Protein Kinase C Alpha	P17252
EIF2S1	Eukaryotic Translation Initiation Factor 2 Subunit Alpha	P05198
CLEC12A	C-Type Lectin Domain Family 12 Member A	Q5QGZ9
SUMO1	Small Ubiquitin Like Modifier 1	P63165
CCR3	C-C Motif Chemokine Receptor 3	P51677
UBB	Ubiquitin B	P0CG47
MAPKAPK2	MAPK Activated Protein Kinase 2	P49137
CD3D	CD3d Molecule	P04234
CHKB	Choline Kinase Beta	Q9Y259
PPIA	Peptidylprolyl Isomerase A	P62937
RUNX1	RUNX Family Transcription Factor 1	Q01196
BCL2L1	BCL2 Like 1	Q07817
GZMA	Granzyme A	P12544
IRF1	Interferon Regulatory Factor 1	P10914
CD81	CD81 Molecule	P60033
CST3	Cystatin C	P01034
PTGS1	Prostaglandin-Endoperoxide Synthase 1	P23219
F10	Coagulation Factor X	P00742
TFRC	Transferrin Receptor	P02786
CBL	Cbl Proto-Oncogene	P22681
CXCL11	C-X-C Motif Chemokine Ligand 11	O14625
MAVS	Mitochondrial Antiviral Signaling Protein	Q7Z434
KPNB1	Karyopherin Subunit Beta 1	Q14974
SLC17A5	Solute Carrier Family 17 Member 5	Q9NRA2
ITGA5	Integrin Subunit Alpha 5	P08648
ARF1	ADP Ribosylation Factor 1	P84077
GRB2	Growth Factor Receptor Bound Protein 2	P62993
CD3E	CD3e Molecule	P07766
ATF2	Activating Transcription Factor 2	P15336
CEACAM3	CEA Cell Adhesion Molecule 3	P40198
HAVCR2	Hepatitis A Virus Cellular Receptor 2	Q8TDQ0
JAK1	Janus Kinase 1	P23458
NPM1	Nucleophosmin 1	P06748
PYCARD	PYD And CARD Domain Containing	Q9ULZ3
IL16	Interleukin 16	Q14005
TBK1	TANK Binding Kinase 1	Q9UHD2
F11	Coagulation Factor XI	P03951
VHL	Von Hippel-Lindau Tumor Suppressor	P40337
KPNA2	Karyopherin Subunit Alpha 2	P52292
RELB	RELB Proto-Oncogene, NF-KB Subunit	Q01201
HFE	Homeostatic Iron Regulator	Q30201
FCER2	Fc Fragment Of IgE Receptor II	P06734
PIK3CB	Phosphatidylinositol-4,5-Bisphosphate 3-Kinase Catalytic Subunit Beta	P42338
BECN1	Beclin 1	Q14457
RAPGEF3	Rap Guanine Nucleotide Exchange Factor 3	O95398
HAVCR1	Hepatitis A Virus Cellular Receptor 1	Q96D42
ISG15	ISG15 Ubiquitin Like Modifier	P05161
PML	Promyelocytic Leukemia	P29590
PRKCE	Protein Kinase C Epsilon	Q02156
CEACAM1	CEA Cell Adhesion Molecule 1	P13688
PIK3CD	Phosphatidylinositol-4,5-Bisphosphate 3-Kinase Catalytic Subunit Delta	O00329
ERN1	Endoplasmic Reticulum To Nucleus Signaling 1	O75460
IFITM1	Interferon Induced Transmembrane Protein 1	P13164
IRAK3	Interleukin 1 Receptor Associated Kinase 3	Q9Y616
NPTX1	Neuronal Pentraxin 1	Q15818
TLR10	Toll Like Receptor 10	Q9BXR5
SLC40A1	Solute Carrier Family 40 Member 1	Q9NP59
LCK	LCK Proto-Oncogene, Src Family Tyrosine Kinase	P06239
EIF2AK3	Eukaryotic Translation Initiation Factor 2 Alpha Kinase 3	Q9NZJ5
POU5F1	POU Class 5 Homeobox 1	Q01860
VAPA	VAMP Associated Protein A	Q9P0L0
CARD9	Caspase Recruitment Domain Family Member 9	Q9H257
TRIM25	Tripartite Motif Containing 25	Q14258
HNRNPA1	Heterogeneous Nuclear Ribonucleoprotein A1	P09651
CCND3	Cyclin D3	P30281
MYOM2	Myomesin 2	P54296
PRKRA	Protein Activator Of Interferon Induced Protein Kinase EIF2AK2	O75569
LCN1	Lipocalin 1	P31025
EIF4E	Eukaryotic Translation Initiation Factor 4E	P06730
ICAM2	Intercellular Adhesion Molecule 2	P13598
BST2	Bone Marrow Stromal Cell Antigen 2	Q10589
IFITM2	Interferon Induced Transmembrane Protein 2	Q01629
KPNA4	Karyopherin Subunit Alpha 4	O00629
USP7	Ubiquitin Specific Peptidase 7	Q93009
DROSHA	Drosha Ribonuclease III	Q9NRR4
CD46	CD46 Molecule	P15529
AHSG	Alpha 2-HS Glycoprotein	P02765
BAG3	BAG Cochaperone 3	O95817
TMPRSS11A	Transmembrane Serine Protease 11A	Q6ZMR5
APOD	Apolipoprotein D	P05090
PRKCB	Protein Kinase C Beta	P05771
RHOB	Ras Homolog Family Member B	P62745
ITGA6	Integrin Subunit Alpha 6	P23229
CALM1	Calmodulin 1	P0DP23
STAT2	Signal Transducer And Activator Of Transcription 2	P52630
BCL2L2	BCL2 Like 2	Q92843
IFI27	Interferon Alpha Inducible Protein 27	P40305
PSMC6	Proteasome 26S Subunit, ATPase 6	P62333
TFR2	Transferrin Receptor 2	Q9UP52
SPI1	Spi-1 Proto-Oncogene	P17947
IGKC	Immunoglobulin Kappa Constant	P01834
PHB2	Prohibitin 2	Q99623
CD151	CD151 Molecule (Raph Blood Group)	P48509
ITGA1	Integrin Subunit Alpha 1	P56199
FAH	Fumarylacetoacetate Hydrolase	P16930
NUDT2	Nudix Hydrolase 2	P50583
AQP1	Aquaporin 1 (Colton Blood Group)	P29972
TMPRSS13	Transmembrane Serine Protease 13	Q9BYE2
CD3G	CD3g Molecule	P09693
PCSK5	Proprotein Convertase Subtilisin/Kexin Type 5	Q92824
CBLB	Cbl Proto-Oncogene B	Q13191
PIK3R2	Phosphoinositide-3-Kinase Regulatory Subunit 2	O00459
TMEM233	Transmembrane Protein 233	B4DJY2
ANXA11	Annexin A11	P50995
CLEC4D	C-Type Lectin Domain Family 4 Member D	Q8WXI8
NMRAL1	NmrA Like Redox Sensor 1	Q9HBL8
OAS1	2'-5'-Oligoadenylate Synthetase 1	P00973
HPGDS	Hematopoietic Prostaglandin D Synthase	O60760
SLC39A14	Solute Carrier Family 39 Member 14	Q15043
OR8U9	Olfactory Receptor Family 8 Subfamily U Member 9	OR8U9
C8G	Complement C8 Gamma Chain	P07360
