# Supplementary material for: Potential mechanism prediction of Cold-Damp Plague Formula against COVID-19 via network pharmacology analysis and molecular docking
Source: Chin Med. 2020 Jul 30;15:78. doi: 10.1186/s13020-020-00360-8 (PMC7391051; doi:10.1186/s13020-020-00360-8)
Supplement: Supplementary file 6 — Additional file 6: Table S5. 1: Node attribute information of GO analysis-biological process (BP). 2: Node attribute information of GO analysis-cellular component (CC). 3: Node attribute information of GO analysis-molecular function (MF). [file 13020_2020_360_MOESM6_ESM.xlsx]

## Sheet: ClueGO-BP-NodeAttribut
Table S5-1. Node attribute information of GO analysis-biological process (BP)
GOID	Ontology Source	GOTerm	GOLevels	GOGroups	Nr. Genes	% Associated Genes	Term PValue	Term PValue Corrected with Bonferroni step down	Group PValue	Group PValue Corrected with Bonferroni step down	Associated Genes Found	All Associated Genes	OverViewTerm
GO:0032496	GO_BiologicalProcess-GOA_23.02.2017_10h01	response to lipopolysaccharide	[4, 5, 7]	[Group097, Group101, Group157]	28	8.16327	3.00859e-30	1.09814e-27	{Group097=5.641539777391449E-38, Group101=6.970265301625163E-27, Group157=6.014358351570216E-37}	{Group097=9.026463643826318E-36, Group101=1.0037182034340234E-24, Group157=9.562829778996643E-35}	[CASP3, CASP8, CCL2, CDK4, CSF2, CXCL10, CXCL11, CXCL2, CXCL8, FOS, ICAM1, IFNG, IL10, IL1B, IL6, MAPK1, MAPK14, MAPK3, MAPK8, NFKB1, NOS2, NOS3, PRKCA, PRKCE, PTGS2, RELA, SERPINE1, TNF]	[ABCA1, ABCC2, ABCC8, ABL1, ABR, ACOD1, ADAM17, ADAM9, ADAMTS13, ADH5, ADM, AICDA, AKAP8, AKIRIN2, AKT1, ALAD, ALPL, AMH, ANKRD1, APOB, ARG1, ATP4B, AXL, AZU1, B2M, BCR, BDKRB1, BMP6, BPI, BTF3P11, C16005, C18200, C18201, C5AR1, CACTIN, CAMP, CASP1, CASP3, CASP8, CASP9, CCL2, CCL20, CCL3, CCL5, CCR5, CCR7, CD14, CD180, CD27, CD36, CD40, CD55, CD6, CD80, CD86, CD96, CDC73, CDK19, CDK4, CEBPB, CEBP…	TRUE
GO:0071216	GO_BiologicalProcess-GOA_23.02.2017_10h01	cellular response to biotic stimulus	[3]	[Group101, Group124]	23	11.3861	4.51911e-28	1.64496e-25	{Group101=6.970265301625163E-27, Group124=7.279489626776259E-30}	{Group101=1.0037182034340234E-24, Group124=1.1064824232699913E-27}	[CCL2, CDK4, CSF2, CXCL10, CXCL8, ICAM1, IFNG, IL10, IL1B, IL6, MAPK1, MAPK14, MAPK3, MAPK8, NFKB1, NOS2, NOS3, PRKCA, PRKCE, RELA, SERPINE1, TNF, TP53]	[ABCA1, ABCB4, ABCC2, ABL1, ACOD1, ADAM9, ADAMTS13, AICDA, AKAP8, AKT1, AMH, ANKRD1, APAF1, ARG1, ATG10, AXL, AZU1, B2M, BCR, BMP6, BPI, BTK, CACTIN, CAMP, CCDC47, CCL2, CCL20, CCL3, CCL5, CCR5, CD14, CD180, CD36, CD40, CD55, CD6, CD80, CD86, CDC73, CDK19, CDK4, CEBPB, CEBPE, CHAMP1, CLEC7A, CMPK2, CPEB1, CSF2, CSF3, CTR9, CTSG, CX3CR1, CXCL10, CXCL16, CXCL8, DAB2IP, DDIT3, DEFB114, EDNRB, EHHADH…	TRUE
GO:0071222	GO_BiologicalProcess-GOA_23.02.2017_10h01	cellular response to lipopolysaccharide	[5, 6, 8]	[Group061, Group101, Group124, Group161]	22	12.7168	6.22831e-28	2.26088e-25	{Group061=2.3024050426205298E-26, Group101=6.970265301625163E-27, Group124=7.279489626776259E-30, Group161=1.2972628010365007E-28}	{Group061=3.269415160521152E-24, Group101=1.0037182034340234E-24, Group124=1.1064824232699913E-27, Group161=1.945894201554751E-26}	[CCL2, CDK4, CSF2, CXCL10, CXCL8, ICAM1, IFNG, IL10, IL1B, IL6, MAPK1, MAPK14, MAPK3, MAPK8, NFKB1, NOS2, NOS3, PRKCA, PRKCE, RELA, SERPINE1, TNF]	[ABCA1, ABCC2, ABL1, ACOD1, ADAM9, ADAMTS13, AICDA, AKAP8, AKT1, AMH, ANKRD1, ARG1, AXL, AZU1, B2M, BCR, BMP6, BPI, CACTIN, CAMP, CCL2, CCL20, CCL3, CCL5, CCR5, CD14, CD180, CD36, CD40, CD55, CD6, CD80, CD86, CDC73, CDK19, CDK4, CEBPB, CEBPE, CHAMP1, CMPK2, CPEB1, CSF2, CSF3, CTR9, CTSG, CX3CR1, CXCL10, CXCL16, CXCL8, DAB2IP, DEFB114, EDNRB, EHHADH, FAM58A, FCAR, GFI1, GSTP1, GUCY2C, HAMP, HAVCR2…	TRUE
GO:0006954	GO_BiologicalProcess-GOA_23.02.2017_10h01	inflammatory response	[4]	[Group123, Group157]	30	4.15512	8.04565e-24	2.90448e-21	{Group123=1.2336345804534712E-34, Group157=6.014358351570216E-37}	{Group123=1.9368062913119498E-32, Group157=9.562829778996643E-35}	[ACE2, APOE, CCL2, CCR3, CD40LG, CXCL10, CXCL11, CXCL2, CXCL8, EGFR, FOS, HMOX1, ICAM1, IL10, IL1A, IL1B, IL2, IL4, IL6, MAPK14, NFKB1, NOS2, PIK3CG, PPARG, PTGS1, PTGS2, RELA, SERPINE1, SMAD3, TNF]	[A2M, ABCF1, ABR, ACE2, ACKR1, ACKR2, ACKR4, ACOD1, ACVR1, ADA, ADAM8, ADAMTS12, ADCYAP1, ADGRE2, ADGRE5, ADIPOQ, ADORA1, ADORA2A, ADORA2B, ADORA3, AFAP1L2, AGER, AGT, AGTR1, AGTR2, AGXT, AHCY, AHSG, AIF1, AIM2, AIMP1, AKR1C1, AKT1, ALOX15, ALOX5, ALOX5AP, AMH, ANO6, ANXA1, AOAH, AOC3, AOX1, APCS, APOA1, APOA2, APOD, APOE, APOL2, APOL3, ASH1L, ATRN, AXL, AZU1, B4GALT1, BAP1, BCL6, BCL6B, BCR, BDK…	TRUE
GO:0001819	GO_BiologicalProcess-GOA_23.02.2017_10h01	positive regulation of cytokine production	[3, 4, 5]	[Group016, Group064, Group141, Group161]	25	5.98086	1.70398e-23	6.13432e-21	{Group016=3.326267134003456E-24, Group064=1.2494360185450583E-22, Group141=5.055409846520685E-27, Group161=1.2972628010365007E-28}	{Group016=4.523723302244701E-22, Group064=1.586783743552224E-20, Group141=7.330344277454994E-25, Group161=1.945894201554751E-26}	[ATF2, CCL2, CD4, CD40LG, CREB1, CSF2, HMOX1, HSPB1, IFNG, IL10, IL1A, IL1B, IL2, IL4, IL6, MAPK14, MAPK3, NFKB1, PIK3R1, PTGS2, RELA, SERPINE1, SMAD3, SOD1, TNF]	[ABL1, ADAM17, ADAM8, ADCYAP1, ADIPOQ, ADORA2B, ADRA2A, AFAP1L2, AGER, AGPAT1, AGPAT2, AGT, AGTR2, AGXT, AIFM2, AIM2, AKIRIN2, ALOX15B, AMH, ANKRD17, ANXA1, APOA2, ARFGEF2, ARHGEF2, ARNT, ATF2, ATF4, ATP6AP2, AZU1, B2M, BCL10, BCL3, BIRC2, BIRC3, BRCA1, BTNL2, C1QBP, C1QTNF3, C3, C3AR1, C5, C5AR1, CADM1, CALCA, CAMP, CARD11, CARD8, CARD9, CASP1, CASP5, CCBE1, CCDC88B, CCL19, CCL2, CCL20, CCL3, CC…	TRUE
GO:0010035	GO_BiologicalProcess-GOA_23.02.2017_10h01	response to inorganic substance	[3]	[Group155]	27	4.92701	3.19206e-23	1.14595e-20	{Group155=1.5800558011000385E-30}	{Group155=2.4490864917050597E-28}	[ATF2, BCL2, CALM1, CASP3, CASP8, CAT, CDK4, CREB1, CSF2, EGFR, FOS, G6PD, HMOX1, ICAM1, IL1A, IL4, IL6, MAPK1, MAPK3, MAPK8, NOS3, PARP1, PTGS1, PTGS2, RELA, SOD1, TNF]	[AANAT, ABAT, ABCB4, ABCC2, ABCC8, ABL1, ACER1, ACO1, ACTA1, ACTG1, ADA, ADAM9, ADAMTS13, ADCY1, ADCY10, ADD1, ADNP, ADPRHL2, AHCYL1, AIFM1, AKR1B1, AKR1C3, AKT1, ALAD, ALG2, ALOX15, ALOX5AP, ANK3, ANXA1, ANXA11, ANXA7, AOC1, APBB1, APEX1, APOA4, APOB, APOBEC1, APP, APTX, AQP1, AQP2, AQP3, AQP9, AREG, ARG1, ARL13B, ASCL1, ASPH, ATAT1, ATF1, ATF2, ATF4, ATG7, ATIC, ATP13A2, ATP2B4, ATP5D, ATP7A, A…	TRUE
GO:0097191	GO_BiologicalProcess-GOA_23.02.2017_10h01	extrinsic apoptotic signaling pathway	[4, 5, 6, 7]	[Group136, Group160, Group161]	21	8.71369	4.20537e-23	1.50552e-20	{Group136=1.8509521382527809E-22, Group160=2.095925753462619E-36, Group161=1.2972628010365007E-28}	{Group136=2.313690172815976E-20, Group160=3.311562690470938E-34, Group161=1.945894201554751E-26}	[BAX, BCL2, BCL2L1, CASP3, CASP8, CSF2, HMOX1, ICAM1, IFNG, IL1A, IL1B, IL2, IL4, IL6, MCL1, NOS3, PIK3R1, RELA, SERPINE1, SMAD3, TNF]	[ACSL5, ACVR1, ACVR1B, AGAP2, AGT, AGTR2, AGXT, AKR1B1, AKT1, APPL1, AR, AREG, ARHGEF2, ATF3, BAD, BAG3, BAK1, BAX, BCL10, BCL2, BCL2L1, BCL2L10, BCL2L11, BCL2L14, BCL2L2, BEX3, BID, BIRC6, BLOC1S2, BMP4, BMP5, BMPR1B, BRCA1, C19897, CASP2, CASP3, CASP8, CASP8AP2, CASP9, CAV1, CD27, CD70, CD8A, CFLAR, CIB1, COL2A1, CRADD, CSF2, CTNNA1, CTTN, CX3CL1, CYLD, DAB2IP, DAPK1, DAPK3, DAXX, DBH, DCC, DDX…	TRUE
GO:0097190	GO_BiologicalProcess-GOA_23.02.2017_10h01	apoptotic signaling pathway	[3, 4, 5, 6]	[Group136, Group160]	28	4.31433	1.46087e-22	5.21531e-20	{Group136=1.8509521382527809E-22, Group160=2.095925753462619E-36}	{Group136=2.313690172815976E-20, Group160=3.311562690470938E-34}	[BAX, BCL2, BCL2L1, CASP3, CASP8, CSF2, HMOX1, HSPB1, ICAM1, IFNG, IL1A, IL1B, IL2, IL4, IL6, MAPK8, MCL1, NOS3, PARP1, PIK3R1, PRKCA, PTGS2, RELA, SERPINE1, SMAD3, SOD1, TNF, TP53]	[ABL1, ACAA2, ACKR3, ACSL5, ACVR1, ACVR1B, ADORA1, ADORA2A, AEN, AGAP2, AGT, AGTR2, AGXT, AIFM1, AKR1B1, AKT1, AMH, ANKRD2, ANXA6, APAF1, APOPT1, APPL1, AR, AREG, ARHGEF2, ARL6IP5, ARRB2, ARTN, ATAD5, ATF3, ATF4, ATM, ATP2A1, ATPIF1, AVP, BAD, BAG3, BAG5, BAG6, BAK1, BAX, BBC3, BCAP31, BCL10, BCL2, BCL2L1, BCL2L10, BCL2L11, BCL2L12, BCL2L14, BCL2L2, BCL3, BCLAF1, BDKRB1, BDKRB2, BEX3, BID, BIK, B…	TRUE
GO:0071396	GO_BiologicalProcess-GOA_23.02.2017_10h01	cellular response to lipid	[5]	[Group101, Group144]	27	4.50751	3.31083e-22	1.17865e-19	{Group101=6.970265301625163E-27, Group144=3.030093432374026E-28}	{Group101=1.0037182034340234E-24, Group144=4.484538279913559E-26}	[CCL2, CDK4, CREB1, CSF2, CXCL10, CXCL8, EGFR, ICAM1, IFNG, IL10, IL1B, IL6, MAPK1, MAPK14, MAPK3, MAPK8, NFKB1, NOS2, NOS3, PARP1, PPARG, PRKCA, PRKCE, RB1, RELA, SERPINE1, TNF]	[AACS, ABCA1, ABCB4, ABCC2, ABHD2, ABL1, ABL2, ACACA, ACOD1, ADAM9, ADAMTS13, ADCY1, ADCY2, ADCY3, ADCY5, ADCY6, ADCY8, ADCYAP1, ADNP2, AGTR2, AICDA, AIFM1, AKAP13, AKAP8, AKR1B1, AKR1C2, AKR1C3, AKT1, ALDH1A2, ALOX12, AMH, ANKRD1, ANXA1, APOB, APP, AQP1, AR, AREG, ARG1, ARID1A, ARNTL, ARRB2, ATP1A1, ATP1A2, ATP1A3, ATP1A4, ATP2B1, AXL, AZU1, B2M, BAD, BCR, BGLAP, BMP4, BMP6, BMP7, BPI, BRCA1, BR…	TRUE
GO:0001816	GO_BiologicalProcess-GOA_23.02.2017_10h01	cytokine production	[3]	[Group016, Group064, Group123, Group161]	28	4.02878	9.29941e-22	3.30129e-19	{Group016=3.326267134003456E-24, Group064=1.2494360185450583E-22, Group123=1.2336345804534712E-34, Group161=1.2972628010365007E-28}	{Group016=4.523723302244701E-22, Group064=1.586783743552224E-20, Group123=1.9368062913119498E-32, Group161=1.945894201554751E-26}	[ACE2, ATF2, CCL2, CD4, CD40LG, CREB1, CSF2, HMOX1, HSPB1, IFNG, IL10, IL1A, IL1B, IL2, IL4, IL6, MAPK14, MAPK3, NFKB1, NOS2, PIK3CG, PIK3R1, PTGS2, RELA, SERPINE1, SMAD3, SOD1, TNF]	[ABCA1, ABL1, ACE2, ACKR1, ACOD1, ADAM17, ADAM8, ADAMTS3, ADCYAP1, ADGRG1, ADIPOQ, ADORA2B, ADRA2A, AFAP1L2, AGER, AGPAT1, AGPAT2, AGT, AGTR2, AGXT, AIFM2, AIM2, AIRE, AKAP8, AKIRIN2, ALOX15B, AMH, ANGPT1, ANKRD17, ANKRD2, ANXA1, ANXA4, APOA1, APOA2, APOD, ARFGEF2, ARHGEF2, ARNT, ARRB1, ARRB2, ASB1, ASH1L, ATF2, ATF4, ATG5, ATP6AP2, AVPR2, AXL, AZI2, AZIN2, AZU1, B2M, BANK1, BAP1, BATF, BCL10, BC…	TRUE
GO:0072593	GO_BiologicalProcess-GOA_23.02.2017_10h01	reactive oxygen species metabolic process	[3]	[Group116, Group161]	20	7.46269	1.20625e-20	4.25807e-18	{Group116=2.07901236730568E-29, Group161=1.2972628010365007E-28}	{Group116=3.1393086746315765E-27, Group161=1.945894201554751E-26}	[ACE2, BCL2, CAT, EGFR, G6PD, GRB2, ICAM1, IFNG, IL10, IL1B, IL4, IL6, MAPK14, NOS2, NOS3, PTGS2, SMAD3, SOD1, TNF, TP53]	[AATF, ACE2, ACOD1, AGT, AGTR1, AGTR2, AGXT, AGXT2, AIF1, AIFM2, AKR1C3, AKT1, ALOX12, AOX1, APOA4, ARF4, ARG2, ASS1, ATG5, ATP2B4, ATP7A, ATPIF1, BCL2, BCO2, BCR, BECN1, BIRC2, BMP7, BNIP3, BRCA1, BST1, CAT, CAV1, CCS, CD34, CD36, CDKN1A, CFLAR, CLU, COQ7, CPS1, CRAT, CRP, CRYAB, CSRP1, CTGF, CYB5R4, CYBA, CYBB, CYP1A2, CYP1B1, CYP21A2, CYR61, DDAH1, DDAH2, DDIT4, DHFR, DLC1, DNM2, DRD5, DUOX1, …	TRUE
GO:0030335	GO_BiologicalProcess-GOA_23.02.2017_10h01	positive regulation of cell migration	[4, 5, 6, 7]	[Group062, Group101, Group157, Group161]	23	5.34884	1.80667e-20	6.34141e-18	{Group062=4.359779768241478E-20, Group101=6.970265301625163E-27, Group157=6.014358351570216E-37, Group161=1.2972628010365007E-28}	{Group062=4.970148935795285E-18, Group101=1.0037182034340234E-24, Group157=9.562829778996643E-35, Group161=1.945894201554751E-26}	[BCL2, CCL2, CXCL10, CXCL11, CXCL2, CXCL8, EGFR, HSPB1, ICAM1, IFNG, IL1A, IL4, IL6, MAPK1, MAPK14, MAPK3, PIK3R1, PRKCA, PRKCE, PTGS2, SERPINE1, SMAD3, TNF]	[AAMP, ACKR3, ACTN4, ACVR1, ACVR1B, ADAM10, ADAM17, ADAM8, ADAM9, ADGRA2, ADRA2A, AGT, AGXT, AIF1, AKT1, AKT2, ALOX12, AMOT, AMOTL1, ANGPT1, ANGPT4, ANGPTL3, ANO6, ANXA3, APC, ARHGAP8, ARHGEF39, ARHGEF7, ATOH8, ATP5A1, ATP5B, ATP7A, ATP8A1, BAG4, BCAR1, BCAS3, BCL2, BDKRB1, BMP2, BMP4, BMPR2, BUD31, C16542, C1QBP, C3AR1, C5AR1, CALR, CAMK1D, CAMK2D, CAPN7, CARMIL1, CARMIL2, CBLL1, CCAR1, CCBE1, C…	TRUE
GO:2000377	GO_BiologicalProcess-GOA_23.02.2017_10h01	regulation of reactive oxygen species metabolic process	[4, 5]	[Group116, Group161]	17	9.60452	1.79549e-19	6.28423e-17	{Group116=2.07901236730568E-29, Group161=1.2972628010365007E-28}	{Group116=3.1393086746315765E-27, Group161=1.945894201554751E-26}	[ACE2, BCL2, EGFR, G6PD, GRB2, ICAM1, IFNG, IL10, IL1B, IL4, IL6, MAPK14, PTGS2, SMAD3, SOD1, TNF, TP53]	[AATF, ACE2, ACOD1, AGT, AGTR1, AGTR2, AGXT, AGXT2, AIF1, AKR1C3, AKT1, ARF4, ASS1, ATG5, ATP2B4, BCL2, BCO2, BCR, BECN1, BIRC2, BMP7, BNIP3, BRCA1, BST1, CAV1, CD34, CD36, CDKN1A, CFLAR, CLU, COQ7, CRP, CRYAB, CSRP1, CYBA, CYP1B1, DDAH1, DDAH2, DHFR, DLC1, DNM2, DUOXA1, EDN1, EGFR, EIF5AL1, EIF6, ESR1, F2, F2RL1, FBLN5, FOXM1, FOXO1, FOXO3, G6PD, GADD45A, GCH1, GIPC1, GLA, GRB2, GSTP1, HBB, HDAC…	TRUE
GO:0071417	GO_BiologicalProcess-GOA_23.02.2017_10h01	cellular response to organonitrogen compound	[4, 5]	[Group129, Group144, Group159]	24	4.40367	2.07317e-19	7.23536e-17	{Group129=5.489879487929511E-20, Group144=3.030093432374026E-28, Group159=2.3614833448420293E-33}	{Group129=6.0937662316017574E-18, Group144=4.484538279913559E-26, Group159=3.6839140179535657E-31}	[BCL2L1, CASP3, CCL2, CDK4, CREB1, EGFR, GRB2, ICAM1, IL1B, IL6, MAPK1, MAPK3, NFKB1, PARP1, PIK3CG, PIK3R1, PPARG, PRKCA, PRKCB, PTGS2, RELA, SOD1, TNF, TP53]	[AANAT, ABCB4, ABL1, ACTN2, ACTR2, ADCY1, ADCY2, ADCY3, ADCY4, ADCY5, ADCY6, ADCY7, ADCY8, ADCY9, ADIPOQ, ADIPOR1, AGT, AGTR1, AGTR2, AGTRAP, AGXT, AHCYL1, AHSG, AIF1, AKAP6, AKAP7, AKAP9, AKR1B1, AKT1, AKT2, AOC1, AP3S1, APC, APEX1, APLP1, APOBEC1, APP, APPL1, APRT, AQP1, AQP8, AQP9, ARG1, ARHGEF2, ATF4, ATG7, ATP2B4, ATP6AP1, ATP6V0A1, ATP6V0A2, ATP6V0A4, ATP6V0B, ATP6V0C, ATP6V0D1, ATP6V0D2, A…	TRUE
GO:0032103	GO_BiologicalProcess-GOA_23.02.2017_10h01	positive regulation of response to external stimulus	[3, 4, 5]	[Group123, Group157, Group161]	19	6.73759	8.85592e-19	3.08186e-16	{Group123=1.2336345804534712E-34, Group157=6.014358351570216E-37, Group161=1.2972628010365007E-28}	{Group123=1.9368062913119498E-32, Group157=9.562829778996643E-35, Group161=1.945894201554751E-26}	[CCL2, CXCL10, CXCL11, CXCL2, CXCL8, EGFR, HSPB1, IL1B, IL2, IL4, IL6, MAPK14, MAPK3, PIK3CG, PRKCA, PTGS2, SERPINE1, SMAD3, TNF]	[ACOD1, ADAM10, ADAM17, ADAM8, ADORA2B, AGER, AGT, AGTR1, AGXT, AIF1, ALOX5AP, AMH, ANKRD17, ANO6, APOH, ARTN, AZU1, BMP6, BMPR2, BRAF, BTK, BUD31, C1QBP, C3, C3AR1, C5AR1, CALR, CAMK1D, CASR, CCL1, CCL19, CCL2, CCL21, CCL24, CCL26, CCL3, CCL4, CCL5, CCL7, CCM2, CCR1, CCR2, CCR4, CCR6, CCR7, CD180, CD28, CD47, CD6, CD74, CDH13, CDK19, CLOCK, CMKLR1, CNOT6, CNR1, CNTF, CNTN1, CPB2, CREB3, CREB3L3,…	TRUE
GO:0006979	GO_BiologicalProcess-GOA_23.02.2017_10h01	response to oxidative stress	[3]	[Group037, Group155, Group160]	22	4.814	1.38103e-18	4.77837e-16	{Group037=6.61054049147753E-17, Group155=1.5800558011000385E-30, Group160=2.095925753462619E-36}	{Group037=5.5528540128411255E-15, Group155=2.4490864917050597E-28, Group160=3.311562690470938E-34}	[APOE, BCL2, CASP3, CAT, EGFR, FOS, G6PD, HMOX1, HSPB1, IL6, MAPK1, MAPK3, MAPK8, MCL1, NOS3, PARP1, PTGS1, PTGS2, RELA, SOD1, TNF, TP53]	[ABCC2, ABL1, ACOX2, ADA, ADAM9, ADIPOQ, ADNP2, ADPRHL2, AIF1, AIFM1, AKR1B1, AKR1C3, AKT1, ALAD, ALDH3B1, ALS2, ANGPTL7, ANKRD2, ANXA1, APEX1, APOA4, APOD, APOE, APP, APTX, AQP1, AREG, ARG1, ARL6IP5, ARNT, ARNTL, ATAT1, ATF4, ATG7, ATOX1, ATP13A2, ATP2A2, ATP7A, ATRN, AXL, BAD, BAG5, BAK1, BCL2, BECN1, BMP7, BNIP3, BRF2, BTK, C19orf12, CA3, CAMKK2, CASP3, CAT, CBX8, CCL19, CCNA2, CCR7, CCS, CD36…	TRUE
GO:2001234	GO_BiologicalProcess-GOA_23.02.2017_10h01	negative regulation of apoptotic signaling pathway	[4, 5, 6, 7, 8]	[Group051, Group136, Group141, Group160, Group161]	18	7.43802	1.41177e-18	4.87062e-16	{Group051=6.726258273302631E-25, Group136=1.8509521382527809E-22, Group141=5.055409846520685E-27, Group160=2.095925753462619E-36, Group161=1.2972628010365007E-28}	{Group051=9.28223641715763E-23, Group136=2.313690172815976E-20, Group141=7.330344277454994E-25, Group160=3.311562690470938E-34, Group161=1.945894201554751E-26}	[BAX, BCL2, BCL2L1, CASP8, CSF2, HMOX1, HSPB1, ICAM1, IL1A, IL1B, IL4, IL6, MCL1, NOS3, PTGS2, RELA, SERPINE1, TNF]	[ACAA2, ACKR3, ACVR1, AGAP2, AKR1B1, AKT1, AMH, AR, AREG, ARHGEF2, ARRB2, ATAD5, AVP, BAG5, BAX, BCL2, BCL2L1, BCL2L10, BCL2L12, BDKRB1, BDKRB2, BID, BIRC6, BMP4, BMP5, BOK, BRCA1, C13662, C18200, CASP8, CCAR2, CD44, CD74, CDKN2D, CFLAR, CLU, COL2A1, CREB3, CREB3L1, CREB3L4, CSF2, CTH, CTNNA1, CTNNB1, CTTN, CX3CL1, CXCL12, DAPK1, DDX3X, DNAJA1, ELL3, ENO1, EPO, EPRS, EPX, EYA1, EYA2, EYA3, EYA4, …	TRUE
GO:0050727	GO_BiologicalProcess-GOA_23.02.2017_10h01	regulation of inflammatory response	[4, 5, 6]	[Group016, Group097, Group110, Group123, Group138, Group157, Group161]	19	6.05096	6.67336e-18	2.29564e-15	{Group016=3.326267134003456E-24, Group097=5.641539777391449E-38, Group110=1.095475490592073E-21, Group123=1.2336345804534712E-34, Group138=2.2350029818032858E-20, Group157=6.014358351570216E-37, Group161=1.2972628010365007E-28}	{Group016=4.523723302244701E-22, Group097=9.026463643826318E-36, Group110=1.3583896083341706E-19, Group123=1.9368062913119498E-32, Group138=2.6149534887098442E-18, Group157=9.562829778996643E-35, Group161=1.945894201554751E-26}	[ACE2, APOE, CXCL10, EGFR, IL10, IL1B, IL2, IL4, IL6, MAPK14, NFKB1, NOS2, PIK3CG, PPARG, PTGS2, RELA, SERPINE1, SMAD3, TNF]	[A2M, ABR, ACE2, ACOD1, ADA, ADAM8, ADAMTS12, ADCYAP1, ADIPOQ, ADORA1, ADORA2A, ADORA2B, AGER, AGT, AGTR1, AGXT, AHSG, AKR1C1, ALOX5AP, ANXA1, AOAH, APCS, APOA1, APOD, APOE, ASH1L, BAP1, BCL6, BCL6B, BCR, BIRC2, BIRC3, BRD4, BST1, BTK, C1QBP, C1QTNF12, C1QTNF3, C2, C3, C3AR1, C4A, C4B, C4BPA, C4BPB, C5, C5AR1, C5AR2, C5orf30, C6, C7, C8A, C8B, C8G, C9, CALCRL, CASP1, CASP4, CASP5, CCL24, CCL3, CC…	TRUE
GO:0051090	GO_BiologicalProcess-GOA_23.02.2017_10h01	regulation of sequence-specific DNA binding transcription factor activity	[3, 6, 7, 8, 9, 10, 11]	[Group059, Group105, Group132, Group144, Group155, Group161]	20	5.05051	2.67633e-17	9.15306e-15	{Group059=7.565770288482156E-24, Group105=7.609187719694851E-20, Group132=1.6327869166520973E-27, Group144=3.030093432374026E-28, Group155=1.5800558011000385E-30, Group161=1.2972628010365007E-28}	{Group059=1.013813218656609E-21, Group105=8.370106491664335E-18, Group132=2.383868898312062E-25, Group144=4.484538279913559E-26, Group155=2.4490864917050597E-28, Group161=1.945894201554751E-26}	[ATF2, CAT, CD40LG, FOS, HMOX1, ICAM1, IL10, IL1B, IL4, IL6, MAPK1, MAPK14, MAPK3, MAPK8, NFKB1, PPARG, PRKCB, RB1, RELA, TNF]	[ABRA, ACOD1, ADAM8, ADGRG3, AGER, AGT, AGXT, AIM2, AKR1B1, AKT1, ALK, AMH, ANXA3, ANXA4, AR, AREG, ARHGEF2, ARHGEF5, ARID5B, ARRB1, ARRB2, ATF2, BCL10, BEX1, BEX2, BHLHE40, BMP7, BRMS1, BRMS1L, BTK, BTRC, BUD31, C00454, C3orf33, CACTIN, CAMK1D, CAMK2A, CAPN3, CARD11, CARD14, CARM1, CAT, CD40, CD40LG, CDK5RAP3, CDKN2A, CEBPG, CFLAR, CHORDC1, CHP1, CHUK, CIB1, CLOCK, CLU, CMKLR1, COMMD1, COMMD6, C…	TRUE
GO:1903409	GO_BiologicalProcess-GOA_23.02.2017_10h01	reactive oxygen species biosynthetic process	[3, 4]	[Group110, Group116, Group123, Group145, Group158, Group161]	13	12.8713	9.38324e-17	3.19968e-14	{Group110=1.095475490592073E-21, Group116=2.07901236730568E-29, Group123=1.2336345804534712E-34, Group145=8.291268333444812E-26, Group158=2.1814444388913482E-30, Group161=1.2972628010365007E-28}	{Group110=1.3583896083341706E-19, Group116=3.1393086746315765E-27, Group123=1.9368062913119498E-32, Group145=1.1607775666822736E-23, Group158=3.3594244358926764E-28, Group161=1.945894201554751E-26}	[EGFR, ICAM1, IFNG, IL10, IL1B, IL4, IL6, NOS2, NOS3, PTGS2, SMAD3, SOD1, TNF]	[AGT, AGTR2, AGXT, AGXT2, AIF1, AKT1, ARG2, ASS1, ATP2B4, CAV1, CD34, CFLAR, CLU, CYBA, CYBB, CYP1A2, CYP1B1, DDAH1, DDAH2, DNM2, DUOX1, DUOX2, EDN1, EGFR, ESR1, FOXO3, GBF1, GCH1, GCHFR, GLA, HBB, HDAC4, HSP90AA1, HSP90AB1, HSP90B2P, HSPD1, ICAM1, IFNG, IL10, IL1B, IL4, IL6, INS, INSR, ITGB2, JAK2, KHSRP, KLF2, KLF4, KLRK1, KRT89P, MAOB, MPO, MPV17L, MTOR, NANOS1, NANOS2, NANOS3, NAT8, NOS1, NOS…	TRUE
GO:0009991	GO_BiologicalProcess-GOA_23.02.2017_10h01	response to extracellular stimulus	[3]	[Group048, Group083, Group097, Group116, Group155]	21	4.23387	1.31243e-16	4.44914e-14	{Group048=2.4289727240682905E-19, Group083=9.283507481187041E-23, Group097=5.641539777391449E-38, Group116=2.07901236730568E-29, Group155=1.5800558011000385E-30}	{Group048=2.550421360271705E-17, Group083=1.1882889575919413E-20, Group097=9.026463643826318E-36, Group116=3.1393086746315765E-27, Group155=2.4490864917050597E-28}	[APOE, BCL2, CAT, CCL2, CD4, CXCL10, EGFR, FOS, G6PD, HMOX1, ICAM1, IL4, IL6, MAPK1, MAPK3, MAPK8, PPARG, PTGS2, RELA, SOD1, TP53]	[AACS, ABCA1, ABCB4, ABCG5, ABCG8, ACACB, ACADM, ACAT1, ACOD1, ACSL1, ACSL3, ACSL4, ACTA1, ACVR1C, ADA, ADCYAP1, ADIPOQ, ADIPOR2, ADM, ADNP, ADORA2B, ADRB1, ADRB2, ADRB3, ADSL, ADSSL1, AES, AGL, AHCY, AIF1, AIFM1, AKR1C3, AKT1, ALAD, ALB, ALDH1A2, ALDH3A1, ALPL, AMBRA1, AOC1, APAF1, APOA1, APOE, AQP2, AQP3, ARG1, ARHGAP35, ARID4A, ARSA, ARSB, ASCL1, ASGR1, ASNS, ATF3, ATF4, ATG14, ATG5, ATG7, ATG…	TRUE
GO:0050900	GO_BiologicalProcess-GOA_23.02.2017_10h01	leukocyte migration	[2, 4, 5, 6]	[Group080, Group157, Group161]	21	4.10156	2.48377e-16	8.37031e-14	{Group080=2.1232905665321592E-17, Group157=6.014358351570216E-37, Group161=1.2972628010365007E-28}	{Group080=1.8684956985483E-15, Group157=9.562829778996643E-35, Group161=1.945894201554751E-26}	[CCL2, CXCL10, CXCL11, CXCL2, CXCL8, GRB2, HMOX1, ICAM1, IFNG, IL10, IL1A, IL1B, IL4, IL6, MAPK14, MAPK3, PIK3CG, PIK3R1, PPIA, SERPINE1, TNF]	[ABR, ADA, ADAM10, ADAM17, ADAM8, ADD2, ADGRE2, ADORA1, AIF1, AIMP1, AIRE, AMH, ANGPT1, ANGPT2, ANGPT4, ANO6, ANXA1, APOB, APOD, ARHGEF5, ARTN, ATP1B1, ATP1B2, ATP1B3, AZU1, B4GALT1, BCR, BDKRB1, BMP5, BMS1P20, BSG, BST1, C19897, C1QBP, C3AR1, C5, C5AR1, C5AR2, CALCA, CALR, CAMK1D, CAV1, CCL1, CCL11, CCL13, CCL14, CCL15, CCL15-CCL14, CCL16, CCL17, CCL18, CCL19, CCL2, CCL20, CCL21, CCL22, CCL23, C…	TRUE
GO:0034599	GO_BiologicalProcess-GOA_23.02.2017_10h01	cellular response to oxidative stress	[4]	[Group107, Group121, Group155, Group160]	17	6.18182	3.26036e-16	1.09548e-13	{Group107=9.28476033582257E-18, Group121=8.591502166967616E-20, Group155=1.5800558011000385E-30, Group160=2.095925753462619E-36}	{Group107=8.63482711231499E-16, Group121=9.278822340325026E-18, Group155=2.4490864917050597E-28, Group160=3.311562690470938E-34}	[BCL2, EGFR, FOS, G6PD, HMOX1, HSPB1, IL6, MAPK1, MAPK3, MAPK8, MCL1, NOS3, PARP1, RELA, SOD1, TNF, TP53]	[ABL1, ADNP2, ADPRHL2, AIF1, AIFM1, AKR1B1, AKR1C3, AKT1, ALDH3B1, ANKRD2, ANXA1, APEX1, APOA4, AQP1, ARG1, ARL6IP5, ARNT, ARNTL, ATF4, ATG7, ATP13A2, ATP2A2, ATP7A, AXL, BAG5, BCL2, BECN1, BMP7, BNIP3, BRF2, BTK, CAMKK2, CBX8, CCNA2, CCS, CD36, CDK1, CDK2, CFL1, CFLAR, CHD6, CHUK, CLU, CPEB2, CRK, CRYGD, CST3, CTNNB1, CYP1B1, DAPK1, DHFR, DHRS2, DIABLO, DNM2, DPEP1, ECT2, EGFR, ENDOG, EPAS1, ETS…	TRUE
GO:0042493	GO_BiologicalProcess-GOA_23.02.2017_10h01	response to drug	[3]	[Group017, Group112, Group113, Group116, Group144, Group155, Group159, Group161]	20	4.26439	7.00196e-16	2.34566e-13	{Group017=4.467650970822906E-20, Group112=2.0443419021937814E-23, Group113=4.548470078238836E-20, Group116=2.07901236730568E-29, Group144=3.030093432374026E-28, Group155=1.5800558011000385E-30, Group159=2.3614833448420293E-33, Group161=1.2972628010365007E-28}	{Group017=5.048445597029884E-18, Group112=2.6780878918738537E-21, Group113=5.094286487627496E-18, Group116=3.1393086746315765E-27, Group144=4.484538279913559E-26, Group155=2.4490864917050597E-28, Group159=3.6839140179535657E-31, Group161=1.945894201554751E-26}	[BCL2, CASP3, CAT, CCL2, CDK4, CREB1, EGFR, FOS, ICAM1, IFNG, IL10, IL1B, IL4, IL6, NOS2, PPARG, PTGS2, RELA, SOD1, TP53]	[AACS, ABAT, ABCA1, ABCA2, ABCA3, ABCA8, ABCB1, ABCB4, ABCB5, ABCC1, ABCC2, ABCC3, ABCC4, ABCC6, ABCC8, ABCC9, ABCD3, ABCG2, ABCG5, ABCG8, ACACB, ACER2, ACOD1, ACSL1, ACTC1, ADA, ADAM17, ADCY1, ADCYAP1R1, ADIPOQ, ADIRF, ADORA2A, ADRA1A, ADRA1D, ADSSL1, AGPAT2, AIM2, AK4, ALAD, ALDH3A1, AMH, ANKRD1, ANTXR1, ANXA1, AOC1, APEX1, APOA1, APOA2, APOBEC1, APOC2, APOD, AQP1, ARG1, ARRB1, ATG5, ATP1A1, AT…	TRUE
GO:0009314	GO_BiologicalProcess-GOA_23.02.2017_10h01	response to radiation	[3]	[Group017, Group065, Group096, Group112, Group120, Group128, Group160]	20	4.16667	1.09106e-15	3.64415e-13	{Group017=4.467650970822906E-20, Group065=3.2052889103204567E-20, Group096=5.896738035562535E-21, Group112=2.0443419021937814E-23, Group120=1.0480295495135786E-20, Group128=2.43620398361868E-20, Group160=2.095925753462619E-36}	{Group017=5.048445597029884E-18, Group065=3.6860822468685255E-18, Group096=7.135053023030667E-19, Group112=2.6780878918738537E-21, Group120=1.2471551639211586E-18, Group128=2.825996620997669E-18, Group160=3.311562690470938E-34}	[BAX, BCL2, BCL2L1, CALM1, CASP3, CAT, CCL2, CREB1, CXCL10, EGFR, FOS, GRB2, ICAM1, MAPK14, MAPK8, PARP1, PIK3R1, PTGS2, RELA, TP53]	[AANAT, ABCA4, ABCG5, ACTR5, ADAM2, ADIRF, AEN, AGRP, AIPL1, AKT1, AKT2, ALAD, ANGPT2, ANTXR1, ANXA1, APOBEC1, APP, AQP1, ARRB1, ASIC2, ASNS, ATF4, ATM, ATP1A2, ATP1A3, ATP8A2, ATR, ATRX, AURKB, B4GALT2, BABAM1, BAK1, BAX, BCL2, BCL2L1, BCL3, BEST1, BHLHE40, BLM, BMF, BRAF, BRAT1, BRCA1, BRCA2, BRCC3, BRE, BRSK1, C15869, C19897, CABP4, CACNA1F, CACNA2D4, CALM1, CAMKMT, CASP3, CASP7, CASP9, CAT, C…	TRUE
GO:1901342	GO_BiologicalProcess-GOA_23.02.2017_10h01	regulation of vasculature development	[4, 5, 6, 7, 8]	[Group051, Group066, Group094, Group152, Group157]	16	6.17761	2.74716e-15	9.12058e-13	{Group051=6.726258273302631E-25, Group066=7.746471611713783E-23, Group094=1.4395324297023587E-22, Group152=3.9478872628846304E-24, Group157=6.014358351570216E-37}	{Group051=9.28223641715763E-23, Group066=9.99294837911078E-21, Group094=1.813810861424972E-20, Group152=5.329647804894251E-22, Group157=9.562829778996643E-35}	[CCL2, CCR3, CXCL10, CXCL8, HMOX1, HSPB1, IFNG, IL1A, IL1B, IL6, NOS3, PRKCA, PRKCB, PTGS2, SERPINE1, STAT1]	[ACVRL1, ADGRA2, ADGRB1, ADGRB2, ADGRB3, ADM, ADM2, AGGF1, AGT, AGXT, ALOX12, AMOT, ANGPT2, ANGPT4, ANGPTL3, ANGPTL4, ANXA3, APOH, AQP1, ASB4, BMP4, BMP7, BRCA1, BTG1, C13705, C3, C3AR1, C5, C5AR1, C6, CAMP, CCBE1, CCL11, CCL2, CCL24, CCR2, CCR3, CD34, CEACAM1, CELA1, CFLAR, CHAMP1, CHI3L1, CHRFAM7A, CHRNA7, CIB1, CMA1, CNMD, CNTN1, COL4A2, COL4A3, CTH, CTNNB1, CTSH, CX3CL1, CX3CR1, CXCL10, CXCL1…	TRUE
GO:0002685	GO_BiologicalProcess-GOA_23.02.2017_10h01	regulation of leukocyte migration	[3, 4, 5, 6, 7]	[Group061, Group150, Group157, Group161]	14	8.13954	3.93508e-15	1.30251e-12	{Group061=2.3024050426205298E-26, Group150=6.47380039518465E-25, Group157=6.014358351570216E-37, Group161=1.2972628010365007E-28}	{Group061=3.269415160521152E-24, Group150=8.998582549306663E-23, Group157=9.562829778996643E-35, Group161=1.945894201554751E-26}	[CCL2, CXCL10, CXCL11, CXCL2, CXCL8, HMOX1, ICAM1, IL1A, IL4, IL6, MAPK14, MAPK3, SERPINE1, TNF]	[ABR, ADA, ADAM10, ADAM17, ADAM8, ADORA1, AIF1, AIRE, ANO6, ANXA1, APOD, BCR, BDKRB1, BMP5, BST1, C1QBP, C3AR1, C5, C5AR1, C5AR2, CALR, CAMK1D, CCL1, CCL19, CCL2, CCL20, CCL21, CCL24, CCL25, CCL28, CCL3, CCL4, CCL5, CCL7, CCR1, CCR2, CCR6, CCR7, CD300A, CD74, CMKLR1, CREB3, CREB3L4, CSF1, CXCL1, CXCL10, CXCL11, CXCL12, CXCL13, CXCL14, CXCL17, CXCL2, CXCL3, CXCL5, CXCL6, CXCL8, CXCL9, CXCR3, CYP19…	TRUE
GO:0097192	GO_BiologicalProcess-GOA_23.02.2017_10h01	extrinsic apoptotic signaling pathway in absence of ligand	[4, 5, 6, 7, 8]	[Group111, Group136, Group160, Group161]	11	15.0685	4.15612e-15	1.37152e-12	{Group111=1.595395626325167E-17, Group136=1.8509521382527809E-22, Group160=2.095925753462619E-36, Group161=1.2972628010365007E-28}	{Group111=1.4358560636926502E-15, Group136=2.313690172815976E-20, Group160=3.311562690470938E-34, Group161=1.945894201554751E-26}	[BAX, BCL2, BCL2L1, CASP3, CSF2, IL1A, IL1B, IL2, IL4, MCL1, TNF]	[AGAP2, AKT1, APPL1, BAD, BAG3, BAK1, BAX, BCL2, BCL2L1, BCL2L10, BCL2L11, BCL2L2, CASP2, CASP3, CASP9, COL2A1, CSF2, CTNNA1, CX3CL1, DAPK3, DCC, ERBB3, EYA1, EYA2, EYA3, EYA4, FADD, FAS, FASN, FGF10, FGFR1, FOXO3, FYN, GATA1, GDNF, GFRAL, GSK3A, GSK3B, HSPA1A, HSPA1B, HTRA2, IFI6, IL1A, IL1B, IL2, IL4, IL7, INHBA, ITGAV, KITLG, LCN2, MAP2K5, MAPK7, MCL1, MKNK2, MOAP1, NF1, NRG1, PF4, PPP1CA, PPP…	TRUE
GO:0043434	GO_BiologicalProcess-GOA_23.02.2017_10h01	response to peptide hormone	[4, 5, 6]	[Group101, Group132, Group144]	19	4.24107	4.68956e-15	1.54286e-12	{Group101=6.970265301625163E-27, Group132=1.6327869166520973E-27, Group144=3.030093432374026E-28}	{Group101=1.0037182034340234E-24, Group132=2.383868898312062E-25, Group144=4.484538279913559E-26}	[CAT, CCL2, CDK4, CREB1, GRB2, ICAM1, IL10, IL1B, IL6, MAPK1, MAPK3, NFKB1, PARP1, PIK3R1, PPARG, PRKCA, PRKCB, RELA, STAT1]	[AANAT, ABCC8, ACOD1, ACTN2, ACVR1C, ADCY1, ADCY2, ADCY3, ADCY4, ADCY5, ADCY6, ADCY7, ADCY8, ADCY9, ADIPOQ, ADIPOR1, ADM, AGRP, AGT, AGTR1, AGTR2, AGTRAP, AGXT, AHCYL1, AHSG, AKT1, AKT2, ANXA1, AP3S1, APC, APEX1, APOBEC1, APPL1, APRT, AREG, ARG1, ATP6AP1, ATP6V0A1, ATP6V0A2, ATP6V0A4, ATP6V0B, ATP6V0C, ATP6V0D1, ATP6V0D2, ATP6V0E1, ATP6V0E2, ATP6V1A, ATP6V1B1, ATP6V1B2, ATP6V1C1, ATP6V1C2, ATP6V1…	TRUE
GO:0042035	GO_BiologicalProcess-GOA_23.02.2017_10h01	regulation of cytokine biosynthetic process	[4, 5, 6, 7]	[Group016, Group064, Group072, Group132, Group141, Group145, Group148, Group160, Group161]	12	11.215	8.62714e-15	2.8297e-12	{Group016=3.326267134003456E-24, Group064=1.2494360185450583E-22, Group072=3.6656708819119506E-14, Group132=1.6327869166520973E-27, Group141=5.055409846520685E-27, Group145=8.291268333444812E-26, Group148=7.862789791132838E-14, Group160=2.095925753462619E-36, Group161=1.2972628010365007E-28}	{Group016=4.523723302244701E-22, Group064=1.586783743552224E-20, Group072=2.162745820328051E-12, Group132=2.383868898312062E-25, Group141=7.330344277454994E-25, Group145=1.1607775666822736E-23, Group148=4.2459064872117324E-12, Group160=3.311562690470938E-34, Group161=1.945894201554751E-26}	[CD4, HMOX1, HSPB1, IFNG, IL10, IL1A, IL1B, IL4, IL6, NFKB1, RELA, TNF]	[AIFM2, APOA2, ASB1, AZU1, BCL10, BCL3, CARD11, CARD9, CCL20, CCR2, CD276, CD28, CD3E, CD4, CD80, CD86, CEBPB, CEBPG, CYBB, DEAF1, EBI3, EGR1, EHHADH, ELANE, EREG, ERRFI1, FCER1A, FOXJ1, FOXP3, GATA3, GHRL, GHSR, GLMN, HMOX1, HSPB1, IFNG, IGF2BP1, IGF2BP2, IGF2BP3, IL10, IL12B, IL17F, IL1A, IL1B, IL21, IL27, IL4, IL6, IL9, INHA, INHBA, INHBB, INPP5D, IRF1, IRF4, KLF4, LAG3, LBP, LILRB1, LPAL2, LT…	TRUE
GO:1903829	GO_BiologicalProcess-GOA_23.02.2017_10h01	positive regulation of cellular protein localization	[2, 3, 4, 5, 6]	[Group062, Group109, Group124, Group157, Group161]	18	4.37956	1.6002e-14	5.23265e-12	{Group062=4.359779768241478E-20, Group109=9.5049965209969E-19, Group124=7.279489626776259E-30, Group157=6.014358351570216E-37, Group161=1.2972628010365007E-28}	{Group062=4.970148935795285E-18, Group109=9.219846625366993E-17, Group124=1.1064824232699913E-27, Group157=9.562829778996643E-35, Group161=1.945894201554751E-26}	[BCL2, CASP8, CCL2, EGFR, IFNG, IL1B, IL6, MAPK1, MAPK14, MAPK8, PARP1, PIK3R1, PRKCA, PRKCE, PTGS2, SMAD3, TNF, TP53]	[ABCA12, ABLIM3, ACSL3, ACSM6, ACTL6A, AGR2, AKAP6, AKT1, AKT2, ANK3, ANP32B, ANXA13, APC, ARF6, ARHGEF16, ARIH2, ASPH, ATG13, B3GAT3, BAD, BAG3, BAMBI, BAP1, BBC3, BCAP31, BCAS3, BCL2, BCL2L11, BID, BMF, BMP4, BMP6, BMPR1A, C16542, C21orf33, C2CD5, C8orf4, CACNA1A, CAMK1, CASP8, CCDC88A, CCL19, CCL2, CCT2, CCT3, CCT4, CCT5, CCT6A, CCT7, CCT8, CD27, CD2AP, CDC42, CDH1, CDK1, CDK5, CDK5R1, CDK5RAP…	TRUE
GO:0045428	GO_BiologicalProcess-GOA_23.02.2017_10h01	regulation of nitric oxide biosynthetic process	[4, 5, 6, 7]	[Group110, Group112, Group116, Group123, Group132, Group145, Group148, Group156, Group161]	10	16.9492	2.282e-14	7.43932e-12	{Group110=1.095475490592073E-21, Group112=2.0443419021937814E-23, Group116=2.07901236730568E-29, Group123=1.2336345804534712E-34, Group132=1.6327869166520973E-27, Group145=8.291268333444812E-26, Group148=7.862789791132838E-14, Group156=2.39789469623427E-30, Group161=1.2972628010365007E-28}	{Group110=1.3583896083341706E-19, Group112=2.6780878918738537E-21, Group116=3.1393086746315765E-27, Group123=1.9368062913119498E-32, Group132=2.383868898312062E-25, Group145=1.1607775666822736E-23, Group148=4.2459064872117324E-12, Group156=3.668778885238433E-28, Group161=1.945894201554751E-26}	[EGFR, ICAM1, IFNG, IL10, IL1B, IL4, IL6, PTGS2, SMAD3, TNF]	[AGT, AGTR2, AGXT, AGXT2, AIF1, AKT1, ASS1, ATP2B4, CAV1, CD34, CLU, DDAH1, DDAH2, DNM2, EDN1, EGFR, ESR1, GLA, HBB, HSP90AA1, HSP90AB1, ICAM1, IFNG, IL10, IL1B, IL4, IL6, INS, INSR, ITGB2, JAK2, KHSRP, KLF2, KLF4, KLRK1, KRT89P, MTOR, NAT8, NOS1AP, OPRM1, P2RX4, PITX3, PKD2, PRKD2, PTGIS, PTGS2, PTK2B, PTX3, RGN, SMAD3, SOD2, TICAM1, TLR4, TLR5, TNF, TRPV1, TSPO, WDR35, ZC3H12A]	TRUE
GO:0043279	GO_BiologicalProcess-GOA_23.02.2017_10h01	response to alkaloid	[4, 5]	[Group052, Group070, Group092, Group119, Group129, Group153, Group155, Group159]	13	8.07453	4.59084e-14	1.48743e-11	{Group052=5.019251775501425E-16, Group070=7.878512232929875E-18, Group092=5.2205935367859703E-23, Group119=1.6445864070363825E-16, Group129=5.489879487929511E-20, Group153=9.632572699614655E-25, Group155=1.5800558011000385E-30, Group159=2.3614833448420293E-33}	{Group052=3.764438831626069E-14, Group070=7.405801498954083E-16, Group092=6.786771597821762E-21, Group119=1.2827773974883783E-14, Group129=6.0937662316017574E-18, Group153=1.3196624598472077E-22, Group155=2.4490864917050597E-28, Group159=3.6839140179535657E-31}	[BCL2, BCL2L1, CASP3, CREB1, HMOX1, ICAM1, IL6, MAPK1, NFKB1, PPARG, PRKCE, RELA, TNF]	[ABAT, ABCB4, ACOD1, ADA, ADGRL3, ADORA2A, AIF1, ATG7, ATP1A2, AVP, BAD, BCHE, BCL2, BCL2L1, BLM, C00746, C13662, C16079, CAD, CASP3, CASP6, CASP7, CASQ2, CCNA2, CDK5, CHRFAM7A, CHRNA1, CHRNA2, CHRNA3, CHRNA4, CHRNA5, CHRNA6, CHRNA7, CHRNB1, CHRNB2, CHRNB3, CHRNB4, CHRND, CHRNE, CHRNG, CNR1, CREB1, CRH, CRHBP, DDC, DFFB, DHODH, DHX15, DNM2, DNMT3A, DNMT3B, DPEP1, DPYSL2, DRD1, DRD2, DRD3, DRD4, D…	TRUE
GO:0000302	GO_BiologicalProcess-GOA_23.02.2017_10h01	response to reactive oxygen species	[4]	[Group037, Group070, Group092, Group155, Group158]	15	5.85938	4.90788e-14	1.58524e-11	{Group037=6.61054049147753E-17, Group070=7.878512232929875E-18, Group092=5.2205935367859703E-23, Group155=1.5800558011000385E-30, Group158=2.1814444388913482E-30}	{Group037=5.5528540128411255E-15, Group070=7.405801498954083E-16, Group092=6.786771597821762E-21, Group155=2.4490864917050597E-28, Group158=3.3594244358926764E-28}	[APOE, BCL2, CASP3, CAT, EGFR, FOS, HMOX1, IL6, MAPK1, MAPK3, MAPK8, NOS3, RELA, SOD1, TNF]	[ABL1, ADA, ADAM9, ADPRHL2, AIFM1, AKR1B1, AKR1C3, AKT1, ANXA1, APEX1, APOA4, APOD, APOE, APTX, AQP1, AREG, ARG1, ATP7A, AXL, BAD, BAK1, BCL2, BECN1, BMP7, BNIP3, BTK, CAMKK2, CASP3, CAT, CBX8, CCL19, CCNA2, CCR7, CCS, CD36, CDK1, CDK2, CFL1, CFLAR, CHUK, CLU, COL1A1, CRAT, CRK, CRYAB, CRYGD, CST3, CYBA, CYBB, CYCS, CYP1B1, CYP2E1, DHFR, DLC1, DNM2, DPEP1, DUSP1, DUSP12, ECT2, EDN1, EEF2, EGFR, E…	TRUE
GO:0007568	GO_BiologicalProcess-GOA_23.02.2017_10h01	aging	[3]	[Group017, Group065, Group095, Group116]	16	4.95356	8.61512e-14	2.76545e-11	{Group017=4.467650970822906E-20, Group065=3.2052889103204567E-20, Group095=7.872064311268882E-19, Group116=2.07901236730568E-29}	{Group017=5.048445597029884E-18, Group065=3.6860822468685255E-18, Group095=7.793343668156193E-17, Group116=3.1393086746315765E-27}	[BCL2, CAT, CCL2, CREB1, FOS, GRB2, ICAM1, IL10, IL6, MAPK14, PTGS1, PTGS2, RELA, SERPINE1, SOD1, TP53]	[ABAT, ABL1, ADA, ADM, ADRA1A, ADRA1D, ADRB3, AGT, AGXT, AKT1, ALDH3A1, ALOX12, AMFR, AMH, ANTXR1, APAF1, APEX1, APOD, ARG1, ARNTL, ATG7, ATM, ATP2B1, ATP6, ATP8A2, ATR, ATRX, AURKB, BAK1, BBC3, BCL2, BCL2A1, BCL2L12, BCL6, BECN1, BGLAP, BMPR1A, BRCA2, C16005, C18200, C1D, C2orf40, CACYBP, CALCA, CALR, CANX, CARM1, CASP2, CASP7, CASP9, CAT, CCL2, CD86, CDK1, CDK6, CDKN1A, CDKN1C, CDKN2A, CHEK1, C…	TRUE
GO:1904019	GO_BiologicalProcess-GOA_23.02.2017_10h01	epithelial cell apoptotic process	[6]	[Group090, Group160, Group161]	11	11.2245	1.21344e-13	3.88301e-11	{Group090=1.5479791277768595E-23, Group160=2.095925753462619E-36, Group161=1.2972628010365007E-28}	{Group090=2.0433324486654544E-21, Group160=3.311562690470938E-34, Group161=1.945894201554751E-26}	[BCL2L1, CD40LG, HMOX1, ICAM1, IL10, IL4, IL6, PIK3CG, RB1, SERPINE1, TNF]	[ABL1, AKR1C3, ANGPT1, ANGPTL4, ANO6, ARF6, BCL2L1, BID, BMPR2, BOK, BRAF, CAPN10, CAST, CD248, CD3EAP, CD40, CD40LG, CFLAR, COL18A1, COL4A3, DAB2IP, DNMT3A, E2F1, E2F2, ECSCR, EIF2S1, ERC2, FAS, FASLG, FASN, FGA, FGB, FGF21, FGG, FOXO3, GAS6, GATA3, GPER1, GSN, HIPK1, HMOX1, ICAM1, IL10, IL13, IL4, IL6, JAG2, JAK2, KDR, KRIT1, KRT18, KRT8, MAP3K5, MAPK7, MEN1, MST1, MTCH2, MTOR, NDNF, NEUROD1, N…	TRUE
GO:0045766	GO_BiologicalProcess-GOA_23.02.2017_10h01	positive regulation of angiogenesis	[4, 5, 6, 7, 8, 9, 10, 11, 12]	[Group051, Group066, Group152, Group160, Group161]	12	8.88889	1.48007e-13	4.72142e-11	{Group051=6.726258273302631E-25, Group066=7.746471611713783E-23, Group152=3.9478872628846304E-24, Group160=2.095925753462619E-36, Group161=1.2972628010365007E-28}	{Group051=9.28223641715763E-23, Group066=9.99294837911078E-21, Group152=5.329647804894251E-22, Group160=3.311562690470938E-34, Group161=1.945894201554751E-26}	[CCR3, CXCL8, HMOX1, HSPB1, IL1A, IL1B, IL6, NOS3, PRKCA, PRKCB, PTGS2, SERPINE1]	[ACVRL1, ADM, ADM2, AGGF1, ALOX12, ANGPT2, ANGPT4, ANGPTL3, ANGPTL4, ANXA3, AQP1, BRCA1, BTG1, C3, C3AR1, C5, C5AR1, C6, CAMP, CCBE1, CCL11, CCL24, CCR3, CD34, CELA1, CHAMP1, CHI3L1, CHRFAM7A, CHRNA7, CIB1, CMA1, CNTN1, CTSH, CX3CL1, CX3CR1, CXCL8, CXCR3, CYBB, CYP1B1, CYSLTR2, DDAH1, DLL1, ECM1, ENG, EPHA1, ERAP1, ETS1, F3, FGF1, FGF13, FGF2, FLT1, FOXC2, GATA2, GATA4, GATA6, GDF2, GREM1, HDAC7,…	TRUE
GO:0070997	GO_BiologicalProcess-GOA_23.02.2017_10h01	neuron death	[4]	[Group120, Group122, Group131, Group160]	16	4.7619	1.58392e-13	5.03686e-11	{Group120=1.0480295495135786E-20, Group122=1.1159148140695808E-17, Group131=8.965170180080678E-17, Group160=2.095925753462619E-36}	{Group120=1.2471551639211586E-18, Group122=1.0154824808033186E-15, Group131=7.351439547666156E-15, Group160=3.311562690470938E-34}	[APOE, ATF2, BAX, BCL2, BCL2L1, CASP3, CCL2, CREB1, G6PD, HMOX1, IL6, MCL1, PARP1, RB1, SOD1, TP53]	[AARS, ABL1, ADAM8, ADARB1, ADNP, ADORA2A, AGAP2, AIFM1, AIMP2, AKT1, AKT1S1, AKT2, ALKBH1, AMBRA1, ANGPT1, APAF1, APOE, APP, ARHGEF7, ASCL1, ATF2, ATF4, ATG7, ATM, ATN1, ATP13A2, AXL, BAD, BAG5, BARHL1, BAX, BBC3, BCL2, BCL2L1, BCL2L11, BDNF, BDNF-AS, BHLHB9, BID, BIRC5, BNIP3, BOK, BRAF, BTBD10, BTG2, C18200, C1D, C5AR1, CACNA1A, CASP2, CASP3, CASP7, CASP9, CBL, CCL2, CCL3, CCL5, CD34, CDC34, C…	TRUE
GO:0009612	GO_BiologicalProcess-GOA_23.02.2017_10h01	response to mechanical stimulus	[3]	[Group034, Group048, Group081, Group083, Group097, Group101, Group113, Group123, Group128, Group155]	14	6.22222	1.64989e-13	5.23014e-11	{Group034=1.4198320846036622E-18, Group048=2.4289727240682905E-19, Group081=2.3550023519198475E-19, Group083=9.283507481187041E-23, Group097=5.641539777391449E-38, Group101=6.970265301625163E-27, Group113=4.548470078238836E-20, Group123=1.2336345804534712E-34, Group128=2.43620398361868E-20, Group155=1.5800558011000385E-30}	{Group034=1.3630388012195157E-16, Group048=2.550421360271705E-17, Group081=2.5198525165542367E-17, Group083=1.1882889575919413E-20, Group097=9.026463643826318E-36, Group101=1.0037182034340234E-24, Group113=5.094286487627496E-18, Group123=1.9368062913119498E-32, Group128=2.825996620997669E-18, Group155=2.4490864917050597E-28}	[CASP8, CCL2, CXCL10, EGFR, FOS, IL1B, IL6, MAPK14, MAPK3, MAPK8, NFKB1, PPARG, PTGS2, RELA]	[ABHD12, ACTA1, ACTG1, AGT, AGXT, AKT1, ANGPT2, ANKRD1, ANKRD23, ANO3, AQP1, ARHGDIA, ASIC2, ASIC3, ASNS, ATP1A1, ATP1A2, ATP1A3, ATP1A4, ATP2B2, ATP2B4, ATP8A2, BAD, BAG3, BAK1, BCL10, BDKRB1, BDKRB2, BGLAP, BMP6, BNIP3, BTG2, CASP1, CASP2, CASP5, CASP8, CASP8AP2, CAV3, CCL2, CCNB1, CD40, CHEK1, CHI3L1, CHRNA10, CHRNA9, CITED2, CLCN6, CNN2, CNTNAP2, COL11A1, COL1A1, COL3A1, CRADD, CSRP3, CXCL10,…	TRUE
GO:0051924	GO_BiologicalProcess-GOA_23.02.2017_10h01	regulation of calcium ion transport	[6, 7, 8, 9]	[Group045, Group060, Group154]	14	6.19469	1.75369e-13	5.54167e-11	{Group045=3.066582739010323E-17, Group060=4.473753820840397E-19, Group154=1.203528415039811E-23}	{Group045=2.667926982938981E-15, Group060=4.652703973674013E-17, Group154=1.6006927920029487E-21}	[BAX, BCL2, CALM1, CCL2, CD4, CXCL10, CXCL11, G6PD, ICAM1, NOS3, PIK3CG, PRKCA, PRKCE, PTGS2]	[ABL1, ADCYAP1R1, ADORA2A, ADRA2A, AGT, AGXT, AHNAK, AKAP6, ANK2, APEX1, APP, ARRB2, ASPH, ATG5, ATP1A2, ATP1B1, ATP2B2, ATP2B4, ATP2C2, BAK1, BAX, BCL2, BDKRB1, BEST1, C16079, C18200, CACNA1B, CACNA1C, CACNA1D, CACNA2D1, CACNB1, CACNB2, CACNB3, CACNB4, CALCA, CALM1, CAMK2A, CAMK2B, CAMK2D, CAMK2G, CAPN3, CASK, CASQ1, CASQ2, CASR, CATSPER1, CAV1, CAV3, CBARP, CCL2, CCL3, CCL4, CCL5, CCR1, CD19, C…	TRUE
GO:0071496	GO_BiologicalProcess-GOA_23.02.2017_10h01	cellular response to external stimulus	[3]	[Group034, Group048, Group059, Group097, Group143, Group155]	15	5.20833	2.74435e-13	8.53493e-11	{Group034=1.4198320846036622E-18, Group048=2.4289727240682905E-19, Group059=7.565770288482156E-24, Group097=5.641539777391449E-38, Group143=1.0304610897274216E-26, Group155=1.5800558011000385E-30}	{Group034=1.3630388012195157E-16, Group048=2.550421360271705E-17, Group059=1.013813218656609E-21, Group097=9.026463643826318E-36, Group143=1.4735593583102129E-24, Group155=2.4490864917050597E-28}	[BCL2, CASP8, EGFR, FOS, HMOX1, ICAM1, IL1B, IL6, MAPK1, MAPK3, MAPK8, NFKB1, PPARG, PTGS2, TP53]	[ABCB4, ADNP, ADORA2B, AES, AGT, AGXT, AIF1, AIFM1, AKR1C3, AKT1, ALB, AMBRA1, ANKRD1, AOC1, AQP1, AQP2, ARHGAP35, ARHGDIA, ASGR1, ASNS, ATF3, ATF4, ATG14, ATG5, ATG7, ATP1A1, ATP1A2, ATP1A3, ATP1A4, ATP2B1, AVPR1A, AXL, BAD, BAG3, BAK1, BCL10, BCL2, BECN1, BECN2, BGLAP, BHLHA15, BMP6, BMPR2, BNIP3, BRIP1, CADPS2, CARTPT, CASP1, CASP2, CASP5, CASP8, CASP8AP2, CASR, CAV1, CBL, CBS, CD40, CDKN1A, C…	TRUE
GO:0051402	GO_BiologicalProcess-GOA_23.02.2017_10h01	neuron apoptotic process	[5, 6]	[Group120, Group122, Group131, Group160]	14	5.83333	4.00104e-13	1.23632e-10	{Group120=1.0480295495135786E-20, Group122=1.1159148140695808E-17, Group131=8.965170180080678E-17, Group160=2.095925753462619E-36}	{Group120=1.2471551639211586E-18, Group122=1.0154824808033186E-15, Group131=7.351439547666156E-15, Group160=3.311562690470938E-34}	[APOE, ATF2, BAX, BCL2, BCL2L1, CASP3, CCL2, G6PD, HMOX1, MCL1, PARP1, RB1, SOD1, TP53]	[AARS, ADAM8, ADARB1, ADNP, ADORA2A, AGAP2, AIFM1, AKT1S1, AKT2, ALKBH1, AMBRA1, ANGPT1, APAF1, APOE, APP, ARHGEF7, ASCL1, ATF2, ATF4, ATM, ATN1, AXL, BARHL1, BAX, BBC3, BCL2, BCL2L1, BCL2L11, BDNF, BDNF-AS, BHLHB9, BID, BIRC5, BNIP3, BOK, BRAF, BTG2, C1D, C5AR1, CACNA1A, CASP2, CASP3, CASP7, CASP9, CCL2, CCL3, CDC34, CDC42, CDK5, CDK5R1, CEBPB, CHL1, CIT, CITED1, CLCF1, CLN3, CNTF, CNTFR, CORO1A…	TRUE
GO:0009266	GO_BiologicalProcess-GOA_23.02.2017_10h01	response to temperature stimulus	[3]	[Group020, Group048, Group066, Group081, Group097, Group155]	14	5.76132	4.74234e-13	1.44641e-10	{Group020=2.552530913936693E-12, Group048=2.4289727240682905E-19, Group066=7.746471611713783E-23, Group081=2.3550023519198475E-19, Group097=5.641539777391449E-38, Group155=1.5800558011000385E-30}	{Group020=9.699617472959434E-11, Group048=2.550421360271705E-17, Group066=9.99294837911078E-21, Group081=2.5198525165542367E-17, Group097=9.026463643826318E-36, Group155=2.4490864917050597E-28}	[CASP8, CCL2, CXCL10, FOS, HMOX1, IL1A, IL6, MAPK1, MAPK3, NOS3, PPARG, PRKCA, PTGS2, SOD1]	[AAAS, ABCC2, ACADM, ACADVL, ACOT11, ADM, ADORA1, ADRB1, ADRB2, ADRB3, AKT1, AKT1S1, ANO1, ANO3, ANTXR1, ARPP21, ARRB2, ASIC3, ATM, ATP2B1, ATR, ATXN3, ATXN8, BAG1, BAG2, BAG3, BAG4, BAG5, C03958, C8orf4, CALCA, CAMK2A, CAMK2B, CAMK2D, CAMK2G, CASP8, CASQ1, CCAR2, CCL2, CCM2, CD14, CD34, CDH8, CDKN1A, CETN1, CHORDC1, CIRBP, CLPB, CLU, COX2, CPB2, CREBBP, CRNN, CRYAB, CXCL10, CXCL12, DAXX, DNAJA1,…	TRUE
GO:0050673	GO_BiologicalProcess-GOA_23.02.2017_10h01	epithelial cell proliferation	[3]	[Group049, Group093, Group145, Group161]	16	4.16667	1.2241e-12	3.72126e-10	{Group049=5.259467498051892E-14, Group093=6.491736171405106E-16, Group145=8.291268333444812E-26, Group161=1.2972628010365007E-28}	{Group049=2.9978964738895782E-12, Group093=4.674050043411676E-14, Group145=1.1607775666822736E-23, Group161=1.945894201554751E-26}	[APOE, ATF2, BAX, CCL2, CCR3, EGFR, HMOX1, IFNG, IL10, IL6, MAPK1, PRKCA, RB1, SMAD3, STAT1, TNF]	[A4GNT, ACVR2A, ACVRL1, AGAP2, AGGF1, AIMP1, AKR1B1, AKT1, ALDH1A2, ALMS1, ANG, ANGPTL8, APOA1, APOE, APOH, AR, AREG, ARG1, ARNT, ATF2, ATOH8, ATP5A1, ATP7A, ATPIF1, B4GALT1, BAD, BAX, BCL11B, BCL2L2, BIRC5, BMP2, BMP4, BMP5, BMP6, BMPER, BMPR1A, BMPR2, BRCA2, BTBD10, BTRC, C18201, C21orf33, C5AR1, C5AR2, C6orf89, CALCA, CASK, CAV1, CAV2, CCL11, CCL2, CCL24, CCL26, CCL5, CCND1, CCR3, CD109, CD34,…	TRUE
GO:0019216	GO_BiologicalProcess-GOA_23.02.2017_10h01	regulation of lipid metabolic process	[4, 5]	[Group069, Group161]	15	4.6729	1.31934e-12	3.99761e-10	{Group069=2.746894291012695E-12, Group161=1.2972628010365007E-28}	{Group069=9.888819447645703E-11, Group161=1.945894201554751E-26}	[APOE, CD81, CDK4, CREB1, IFNG, IL1B, NFKB1, PIK3CG, PIK3R1, PPARG, PRKCE, PTGS2, RB1, SOD1, TNF]	[AADAC, ABCD2, ABCG1, ABHD5, ABHD6, ACACB, ACADL, ACADVL, ACER1, ACSL3, ADGRF5, ADIPOQ, ADIPOR1, ADIPOR2, ADORA1, ADRA2A, ADRB2, AGT, AGTR1, AGXT, AKR1C3, AKT1, AKT2, AMBRA1, ANGPTL3, ANGPTL8, ANXA1, APOA1, APOA2, APOA4, APOA5, APOB, APOBEC1, APOC1, APOC2, APOC3, APOD, APOE, ARF1, ARF1P1, ARV1, ATG14, ATP1A1, ATP1A3, ATP1A4, AVP, AVPR1A, BBS4, BCL11B, BMP2, BMP5, BMP6, BRCA1, BSCL2, C13662, C1QTN…	TRUE
GO:0031663	GO_BiologicalProcess-GOA_23.02.2017_10h01	lipopolysaccharide-mediated signaling pathway	[4, 5, 6, 7, 9]	[Group035, Group062, Group066, Group078, Group091, Group101, Group118, Group124, Group147, Group161]	9	15.2542	1.33796e-12	4.04063e-10	{Group035=3.855205702182162E-15, Group062=4.359779768241478E-20, Group066=7.746471611713783E-23, Group078=9.848377456993859E-21, Group091=1.9643660437894692E-20, Group101=6.970265301625163E-27, Group118=4.905106245059882E-26, Group124=7.279489626776259E-30, Group147=2.219335197191626E-28, Group161=1.2972628010365007E-28}	{Group035=2.5444357634402266E-13, Group062=4.970148935795285E-18, Group066=9.99294837911078E-21, Group078=1.1818052948392632E-18, Group091=2.3179519316715738E-18, Group101=1.0037182034340234E-24, Group118=6.916199805534434E-24, Group124=1.1064824232699913E-27, Group147=3.306809443815523E-26, Group161=1.945894201554751E-26}	[CCL2, IL1B, MAPK1, MAPK14, MAPK3, NOS3, PRKCA, PRKCE, TNF]	[ACOD1, AKT1, AMH, BMP6, CACTIN, CCL2, CCL3, CCL5, CD14, CD180, CD55, CD6, DEFB114, EHHADH, HCK, IL18, IL1B, IRAK1, IRAK2, IRF3, LACRT, LBP, LTF, LY86, LY96, LYN, MAPK1, MAPK14, MAPK3, MIF, MTDH, MYD88, NANOS3, NDUFA2, NFKBIA, NFKBIL1, NOS3, PRDM1, PRKCA, PRKCE, PTAFR, PTPN22, RIPK2, RPSA, S100A8, S100A9, SASH1, SCARB1, SIGIRR, TGFB1, TICAM1, TLR2, TLR4, TNF, TNFAIP3, TRAF6, TRIB1, TRIM5, ZCCHC11]	TRUE
GO:0070482	GO_BiologicalProcess-GOA_23.02.2017_10h01	response to oxygen levels	[3]	[Group116, Group159]	16	4.10256	1.54959e-12	4.66427e-10	{Group116=2.07901236730568E-29, Group159=2.3614833448420293E-33}	{Group116=3.1393086746315765E-27, Group159=3.6839140179535657E-31}	[BCL2, CASP3, CAT, CCL2, CDK4, CREB1, DPP4, HMOX1, ICAM1, NOS2, PPARG, PRKCB, PRKCE, PTGS2, SMAD3, TP53]	[ABAT, ABCB4, ACAA2, ACTN4, ACVRL1, ADA, ADAM17, ADAM8, ADIPOQ, ADM, ADORA1, ADSL, AGER, AGTRAP, AHCY, AIFM1, AJUBA, AKT1, ALAD, ALAS2, ALDH3A1, ALKBH5, ANG, ANGPT2, ANGPT4, ANGPTL4, ANKRD1, APAF1, APOLD1, AQP1, ARNT, ARNT2, ASCL2, ATG7, ATM, ATP1B1, ATP6, ATP7A, ATP8, BACH1, BAD, BBC3, BCL2, BECN1, BIRC2, BMP2, BMP7, BNIP3, BNIP3L, BRIP1, BUD31, C03958, C18200, CA9, CAMK2D, CAPN2, CASP1, CASP3, …	TRUE
GO:0071214	GO_BiologicalProcess-GOA_23.02.2017_10h01	cellular response to abiotic stimulus	[3]	[Group034, Group065, Group096, Group097, Group128, Group160]	15	4.57317	1.79964e-12	5.38094e-10	{Group034=1.4198320846036622E-18, Group065=3.2052889103204567E-20, Group096=5.896738035562535E-21, Group097=5.641539777391449E-38, Group128=2.43620398361868E-20, Group160=2.095925753462619E-36}	{Group034=1.3630388012195157E-16, Group065=3.6860822468685255E-18, Group096=7.135053023030667E-19, Group097=9.026463643826318E-36, Group128=2.825996620997669E-18, Group160=3.311562690470938E-34}	[BAX, BCL2L1, CALM1, CASP3, CASP8, EGFR, GRB2, IL1B, MAPK14, MAPK3, MAPK8, NFKB1, PIK3R1, PTGS2, TP53]	[ABCB4, ACTR5, ADIRF, ADSS, ADSSL1, AGT, AGXT, AKT1, AKT2, ANKRD1, ANTXR1, AQP1, AQP2, ARHGDIA, ARHGEF2, ASCL1, ASIC1, ATF4, ATM, ATP1A1, ATP1A2, ATP1A3, ATP1A4, ATR, AURKB, AVPR1A, BAD, BAG3, BAK1, BAX, BCL10, BCL2L1, BDKRB1, BDKRB2, BLM, BMF, BMP6, BNIP3, C18200, CAB39, CACNA1A, CALM1, CAMKMT, CAPN3, CASP1, CASP2, CASP3, CASP5, CASP8, CASP8AP2, CASP9, CCND2, CD40, CDC25A, CDKN1A, CERS1, CHEK1, …	TRUE
GO:0051701	GO_BiologicalProcess-GOA_23.02.2017_10h01	interaction with host	[3, 4]	[Group022, Group050]	13	6.01852	2.02463e-12	6.01316e-10	{Group022=1.0673875035391895E-13, Group050=8.317822597433291E-20}	{Group022=5.336937517695947E-12, Group050=9.066426631202287E-18}	[ACE2, ANPEP, BCL2L1, CASP8, CD4, CD81, CTSB, CXCL8, DPP4, GRB2, ICAM1, PPIA, SMAD3]	[ACE2, AKR1C1, ALB, ANPEP, APCS, ARAF, ATG7, AXL, BAD, BCL2L1, BCL2L11, C9, CASP8, CAV1, CAV2, CBL, CBLL1, CCNK, CCR5, CD209, CD4, CD46, CD55, CD74, CD80, CD81, CD86, CDH1, CDHR3, CHMP2A, CHMP2B, CHMP3, CHMP4A, CHMP4B, CHMP4C, CLDN1, CLEC4G, CLEC4M, CLEC5A, CPSF4, CR1, CR2, CTNNB1, CTNND1, CTSB, CXADR, CXCL8, CXCR4, DAG1, DDB1, DERL1, DPP4, DYNLT1, EFNB2, EFNB3, EIF2AK2, EIF2AK4, EPS15, EXOC2, EX…	TRUE
GO:0002690	GO_BiologicalProcess-GOA_23.02.2017_10h01	positive regulation of leukocyte chemotaxis	[4, 5, 6, 7, 8, 9]	[Group091, Group147, Group150, Group157, Group161]	10	10.989	2.11752e-12	6.26786e-10	{Group091=1.9643660437894692E-20, Group147=2.219335197191626E-28, Group150=6.47380039518465E-25, Group157=6.014358351570216E-37, Group161=1.2972628010365007E-28}	{Group091=2.3179519316715738E-18, Group147=3.306809443815523E-26, Group150=8.998582549306663E-23, Group157=9.562829778996643E-35, Group161=1.945894201554751E-26}	[CCL2, CXCL10, CXCL11, CXCL2, CXCL8, IL4, IL6, MAPK14, MAPK3, SERPINE1]	[ADAM10, ADAM17, AIF1, ANO6, C1QBP, C3AR1, C5AR1, CALR, CAMK1D, CCL1, CCL19, CCL2, CCL21, CCL3, CCL4, CCL5, CCL7, CCR1, CCR2, CCR6, CCR7, CD74, CMKLR1, CREB3, CREB3L4, CSF1, CXCL1, CXCL10, CXCL11, CXCL12, CXCL13, CXCL14, CXCL17, CXCL2, CXCL3, CXCL5, CXCL6, CXCL8, CXCL9, DAPK2, EDN1, EDN2, EDN3, EHHADH, F2RL1, F7, GAS6, GPSM3, HMGB1, IL12A, IL23A, IL4, IL6, IL6R, KARS, LBP, LGALS9, MAPK14, MAPK3, …	TRUE
GO:0030168	GO_BiologicalProcess-GOA_23.02.2017_10h01	platelet activation	[4, 5, 6]	[Group001]	12	7.05882	2.35612e-12	6.927e-10	{Group001=2.356122189815949E-12}	{Group001=9.1888765402822E-11}	[APOE, CD40LG, HSPB1, IL6, MAPK1, MAPK3, NOS3, PIK3CG, PIK3R1, PRKCA, PRKCB, PRKCE]	[ABAT, ACTB, ACTG1, ADAMTS13, ADAMTS18, ADRA2A, ADRA2B, ADRA2C, AKT1, ALOX12, APOE, ARRB1, ARRB2, AXL, BLOC1S3, BLOC1S4, C1GALT1C1, C1QTNF1, CD40, CD40LG, CD9, CEACAM1, CLEC1B, CLIC1, COL1A1, COL1A2, COL3A1, CSRP1, DGKA, DGKB, DGKD, DGKE, DGKG, DGKH, DGKI, DGKK, DGKQ, DGKZ, DMTN, ENTPD2, F2, F2R, F2RL2, F2RL3, F5, F8, FCER1G, FERMT3, FGA, FGB, FGG, FIBP, FLNA, FYN, FZD6, GAS6, GATA1, GNA11, GNA12…	TRUE
GO:1903708	GO_BiologicalProcess-GOA_23.02.2017_10h01	positive regulation of hemopoiesis	[3, 4, 5, 6, 7, 8, 9]	[Group130, Group161]	12	7.05882	2.35612e-12	6.927e-10	{Group130=8.72359720625284E-19, Group161=1.2972628010365007E-28}	{Group130=8.549125262127783E-17, Group161=1.945894201554751E-26}	[CASP8, CD4, CREB1, FOS, IFNG, IL2, IL4, IL6, MAPK14, PRKCA, RB1, TNF]	[ACIN1, ACVR1B, ACVR2A, ADA, ADAM8, AGER, ANKRD54, ANXA1, AP3B1, AP3D1, ARNT, ATP11C, ATP6AP1, ATXN1L, AXL, BAD, BTK, C00870, CA2, CALCA, CASP8, CCL19, CCR1, CD101, CD27, CD4, CD46, CD74, CD80, CD83, CD86, CREB1, CSF1, CSF3, CTNNBIP1, CYLD, DCSTAMP, EGR3, ETS1, FADD, FES, FLT3LG, FOS, FOXC1, FOXO3, FOXP3, GAS6, GATA1, GATA2, GATA3, GLI2, GLI3, GNAS, GPR68, HAX1, HCLS1, HIF1A, HLA-DRB1, HLA-G, HLX…	TRUE
GO:0001101	GO_BiologicalProcess-GOA_23.02.2017_10h01	response to acid chemical	[3]	[Group052, Group083, Group089, Group116, Group129, Group144, Group159]	15	4.29799	4.38099e-12	1.27925e-09	{Group052=5.019251775501425E-16, Group083=9.283507481187041E-23, Group089=2.0657438308566865E-17, Group116=2.07901236730568E-29, Group129=5.489879487929511E-20, Group144=3.030093432374026E-28, Group159=2.3614833448420293E-33}	{Group052=3.764438831626069E-14, Group083=1.1882889575919413E-20, Group089=1.838512009462451E-15, Group116=3.1393086746315765E-27, Group129=6.0937662316017574E-18, Group144=4.484538279913559E-26, Group159=3.6839140179535657E-31}	[ATF2, BCL2L1, CASP3, CAT, CCL2, CDK4, CREB1, EGFR, ICAM1, IL6, PPARG, PRKCE, PTGS2, RELA, TNF]	[AACS, AANAT, AARS, ABCA1, ABCB4, ABCC2, ABL2, ACACA, ACER2, ACSL1, ADCY6, ADIPOQ, ADNP2, AIFM1, AKAP8, AKR1B1, AKR1C1, AKR1C2, AKR1C3, AKR1C4, AKT1, ALAD, ALDH1A2, APOB, AQP1, AQP2, AQP3, ARG1, ASCL1, ASNS, ASXL1, ATF2, ATG7, ATP1A3, ATP2B4, ATP7A, AVPR1A, BAD, BAIAP2, BCHE, BCL11A, BCL2L1, BMP6, BRINP1, BRINP2, BRINP3, C00746, C13055, C15906, C1QTNF1, CACNA1A, CAPN2, CASP3, CASTOR1, CAT, CCL19,…	TRUE
GO:0042108	GO_BiologicalProcess-GOA_23.02.2017_10h01	positive regulation of cytokine biosynthetic process	[4, 5, 6, 7, 8]	[Group054, Group064, Group072, Group141, Group160, Group161]	9	13.4328	4.44242e-12	1.29275e-09	{Group054=3.353524727928328E-13, Group064=1.2494360185450583E-22, Group072=3.6656708819119506E-14, Group141=5.055409846520685E-27, Group160=2.095925753462619E-36, Group161=1.2972628010365007E-28}	{Group054=1.542621374847031E-11, Group064=1.586783743552224E-20, Group072=2.162745820328051E-12, Group141=7.330344277454994E-25, Group160=3.311562690470938E-34, Group161=1.945894201554751E-26}	[CD4, HMOX1, HSPB1, IFNG, IL1A, IL1B, IL4, RELA, TNF]	[AIFM2, APOA2, AZU1, BCL10, BCL3, CARD11, CCL20, CCR2, CD276, CD28, CD3E, CD4, CD80, CD86, CEBPG, CYBB, DEAF1, EBI3, EGR1, EHHADH, ELANE, EREG, FCER1A, GLMN, HMOX1, HSPB1, IFNG, IL12B, IL1A, IL1B, IL21, IL27, IL4, IL9, IRF1, IRF4, LBP, LPAL2, LTB, MAPKAPK2, MYD88, MYDGF, PRG3, PRKCQ, PTAFR, RELA, RPSA, SPN, STAT5B, SYK, TBK1, THBS1, TICAM1, TIRAP, TLR1, TLR3, TLR4, TLR6, TLR7, TLR8, TLR9, TNF, TN…	TRUE
GO:0009895	GO_BiologicalProcess-GOA_23.02.2017_10h01	negative regulation of catabolic process	[3, 4, 5]	[Group090, Group100, Group110, Group123, Group145, Group158, Group160, Group161]	13	5.65217	4.49546e-12	1.30368e-09	{Group090=1.5479791277768595E-23, Group100=1.4518138688106545E-11, Group110=1.095475490592073E-21, Group123=1.2336345804534712E-34, Group145=8.291268333444812E-26, Group158=2.1814444388913482E-30, Group160=2.095925753462619E-36, Group161=1.2972628010365007E-28}	{Group090=2.0433324486654544E-21, Group100=4.0650788326698327E-10, Group110=1.3583896083341706E-19, Group123=1.9368062913119498E-32, Group145=1.1607775666822736E-23, Group158=3.3594244358926764E-28, Group160=3.311562690470938E-34, Group161=1.945894201554751E-26}	[BCL2, BCL2L1, EGFR, HMOX1, IL10, IL1B, IL6, MCL1, NOS2, PIK3CG, RELA, SMAD3, TNF]	[ACACB, ACTN3, ADORA1, ADRA2A, AGAP2, AKT1, ALAD, ANXA2, APOA2, APOC1, APOC3, ATG7, ATP13A2, ATP2B4, ATRAID, AZIN1, AZIN2, BAG5, BAG6, BANP, BCL2, BCL2L1, BMF, BSCL2, CBFA2T3, CCAR2, CDK5RAP3, CDKN2A, CHMP4A, CHMP4B, CIDEA, CLEC16A, CNR1, CRTC3, CST3, CTSA, DAB2IP, DAP, DAPL1, DDIT4, DEDD, DERL2, DERL3, DFFA, DHX34, DLC1, DNPEP, EGFR, EGLN1, EHMT2, EIF4G1, EIF4G2, ERLEC1, ETFBKMT, FBP1, FEZ1, FEZ…	TRUE
GO:0031960	GO_BiologicalProcess-GOA_23.02.2017_10h01	response to corticosteroid	[5, 6]	[Group060, Group065, Group067, Group089, Group112, Group116, Group129, Group158, Group159, Group161]	12	6.48649	6.42139e-12	1.85578e-09	{Group060=4.473753820840397E-19, Group065=3.2052889103204567E-20, Group067=3.8968317253609067E-17, Group089=2.0657438308566865E-17, Group112=2.0443419021937814E-23, Group116=2.07901236730568E-29, Group129=5.489879487929511E-20, Group158=2.1814444388913482E-30, Group159=2.3614833448420293E-33, Group161=1.2972628010365007E-28}	{Group060=4.652703973674013E-17, Group065=3.6860822468685255E-18, Group067=3.3123069665567706E-15, Group089=1.838512009462451E-15, Group112=2.6780878918738537E-21, Group116=3.1393086746315765E-27, Group129=6.0937662316017574E-18, Group158=3.3594244358926764E-28, Group159=3.6839140179535657E-31, Group161=1.945894201554751E-26}	[BCL2, CALM1, CASP3, CCL2, EGFR, FOS, ICAM1, IL10, IL6, PARP1, PTGS2, TNF]	[AANAT, ABCA3, ABCB4, ABCC2, ACOD1, ACSBG1, ADAM9, ADCYAP1, ADIPOQ, ADM, AGL, AGTR2, AGXT, AIF1, AIFM1, AKAP13, AKR1C3, ALAD, ALDH3A1, ALPL, ANXA1, ANXA3, APOA2, AQP1, AREG, ARG1, ATAT1, ATP2B1, AVPR1A, BAD, BCHE, BCL2, BGLAP, BMP6, C00746, C03958, C16079, C18200, CAD, CALCR, CALM1, CASP3, CASP9, CBX3, CCL1, CCL2, CCND1, CDKN1A, CDO1, CFLAR, CLDN1, CNGA3, COL1A1, CPN1, CPNE1, CPS1, CREBRF, CRH, C…	TRUE
GO:0009636	GO_BiologicalProcess-GOA_23.02.2017_10h01	response to toxic substance	[3]	[Group037, Group149, Group155, Group158]	13	5.41667	7.70053e-12	2.21775e-09	{Group037=6.61054049147753E-17, Group149=2.409346134030596E-21, Group155=1.5800558011000385E-30, Group158=2.1814444388913482E-30}	{Group037=5.5528540128411255E-15, Group149=2.963495744857633E-19, Group155=2.4490864917050597E-28, Group158=3.3594244358926764E-28}	[APOE, BAX, BCL2, CAT, CDK4, FOS, MAPK1, MAPK3, NOS3, PTGS1, PTGS2, SOD1, TNF]	[AAED1, ABCB4, ABCC2, ABTB2, ADAMTS13, AHR, AIFM1, ALAD, ALB, APOA4, APOE, APOM, AQP10, ARG1, ASNS, ATP7A, BAK1, BAX, BCL2, BLMH, BMP7, BPHL, BRIP1, C16005, CAT, CCL3, CCL4, CCL5, CCNB1, CCS, CD36, CDH1, CDK1, CDK4, CDKN1A, CERS1, CES1, CHKA, CHST2, CHUK, CLDN1, CLIC2, CNP, CPOX, CPS1, CRAT, CST3, CYGB, CYP1A1, CYP1B1, CYP21A2, CYP2F1, DDC, DEFB132, DHFR, DHRS2, DHX15, DLC1, DNMT3A, DNMT3B, DRD2,…	TRUE
GO:0045073	GO_BiologicalProcess-GOA_23.02.2017_10h01	regulation of chemokine biosynthetic process	[5, 6, 7, 8]	[Group006, Group039, Group141, Group145, Group156, Group161]	6	42.8571	8.39745e-12	2.41007e-09	{Group006=6.140089101751711E-12, Group039=4.678066514792462E-16, Group141=5.055409846520685E-27, Group145=8.291268333444812E-26, Group156=2.39789469623427E-30, Group161=1.2972628010365007E-28}	{Group006=2.0876302945955815E-10, Group039=3.5553305512422715E-14, Group141=7.330344277454994E-25, Group145=1.1607775666822736E-23, Group156=3.668778885238433E-28, Group161=1.945894201554751E-26}	[HMOX1, IFNG, IL1B, IL4, IL6, TNF]	[AZU1, EGR1, ELANE, HMOX1, IFNG, IL1B, IL4, IL6, MYD88, SIGIRR, TICAM1, TLR3, TNF, WNT5A]	TRUE
GO:0051091	GO_BiologicalProcess-GOA_23.02.2017_10h01	positive regulation of sequence-specific DNA binding transcription factor activity	[2, 3, 4, 7, 8, 9, 10, 11, 12]	[Group059, Group105, Group132, Group144, Group153, Group161]	13	5.15873	1.42381e-11	4.07209e-09	{Group059=7.565770288482156E-24, Group105=7.609187719694851E-20, Group132=1.6327869166520973E-27, Group144=3.030093432374026E-28, Group153=9.632572699614655E-25, Group161=1.2972628010365007E-28}	{Group059=1.013813218656609E-21, Group105=8.370106491664335E-18, Group132=2.383868898312062E-25, Group144=4.484538279913559E-26, Group153=1.3196624598472077E-22, Group161=1.945894201554751E-26}	[ATF2, CAT, CD40LG, ICAM1, IL10, IL1B, IL4, IL6, NFKB1, PPARG, PRKCB, RELA, TNF]	[ABRA, ADAM8, AGER, AGT, AGXT, AIM2, AKR1B1, AKT1, ALK, AMH, ANXA3, AR, AREG, ARHGEF2, ARHGEF5, ARID5B, ATF2, BCL10, BEX1, BEX2, BTK, BUD31, C00454, CAMK1D, CAMK2A, CAPN3, CARD11, CARD14, CARM1, CAT, CD40, CD40LG, CEBPG, CFLAR, CHUK, CIB1, CLOCK, CLU, CRAT, CRTC1, CRTC2, CRTC3, CTH, CTNNB1, CYTL1, DDIT3, DDR2, DDRGK1, DDX58, DVL2, EDA, EDA2R, EDN1, EIF2AK2, EP300, EPHA5, ERC1, ESR1, ESR2, FER, FO…	TRUE
GO:0051235	GO_BiologicalProcess-GOA_23.02.2017_10h01	maintenance of location	[2, 3]	[Group068, Group075, Group154, Group161]	14	4.4164	1.72644e-11	4.9031e-09	{Group068=2.008691210230321E-18, Group075=2.6908036920448136E-16, Group154=1.203528415039811E-23, Group161=1.2972628010365007E-28}	{Group068=1.908256649718805E-16, Group075=2.0719188428745066E-14, Group154=1.6006927920029487E-21, Group161=1.945894201554751E-26}	[APOE, BAX, CALM1, CD4, CXCL10, CXCL11, IL10, IL1B, IL6, NFKB1, PPARG, PRKCA, PRKCE, TNF]	[ABCA1, ABCG1, ABHD5, ABL1, ACACB, ACVR1C, AKAP6, AKT1, ALB, ALKBH7, ANGPTL3, ANK2, ANK3, ANKRD13C, AP3D1, APEX1, APOA1, APOB, APOC4, APOE, ARHGAP21, ARL2, ARL2BP, ASPH, ASPM, ATG5, ATP1A2, ATP2A1, ATP7B, B4GALNT1, BAX, BBC3, BBS4, BCL3, BDKRB1, BSCL2, C3, CACNA1C, CALM1, CALR, CAMK2D, CAPN3, CASQ1, CASQ2, CATSPER4, CAV1, CCDC22, CCL19, CCL21, CCL3, CCR5, CCR7, CD19, CD27, CD36, CD4, CEMIP, CER1,…	TRUE
GO:0050678	GO_BiologicalProcess-GOA_23.02.2017_10h01	regulation of epithelial cell proliferation	[4, 5]	[Group049, Group093, Group161]	14	4.33437	2.21754e-11	6.25347e-09	{Group049=5.259467498051892E-14, Group093=6.491736171405106E-16, Group161=1.2972628010365007E-28}	{Group049=2.9978964738895782E-12, Group093=4.674050043411676E-14, Group161=1.945894201554751E-26}	[APOE, ATF2, BAX, CCL2, CCR3, EGFR, IFNG, IL10, IL6, PRKCA, RB1, SMAD3, STAT1, TNF]	[A4GNT, ACVRL1, AGAP2, AGGF1, AIMP1, AKR1B1, AKT1, ALDH1A2, ANG, APOE, APOH, AR, AREG, ARG1, ARNT, ATF2, ATOH8, ATP5A1, ATP7A, ATPIF1, B4GALT1, BAD, BAX, BCL11B, BIRC5, BMP2, BMP4, BMP5, BMP6, BMPR1A, BMPR2, BRCA2, C18201, C21orf33, C5AR1, C5AR2, CASK, CAV1, CAV2, CCL11, CCL2, CCL24, CCL26, CCL5, CCND1, CCR3, CD109, CDC42, CDC73, CDH13, CDH15, CDH3, CDK6, CDKN1B, CDKN1C, CDKN2B, CEACAM1, CFLAR, C…	TRUE
GO:1901654	GO_BiologicalProcess-GOA_23.02.2017_10h01	response to ketone	[4]	[Group089, Group112, Group129, Group144, Group159]	12	5.7971	2.40816e-11	6.76694e-09	{Group089=2.0657438308566865E-17, Group112=2.0443419021937814E-23, Group129=5.489879487929511E-20, Group144=3.030093432374026E-28, Group159=2.3614833448420293E-33}	{Group089=1.838512009462451E-15, Group112=2.6780878918738537E-21, Group129=6.0937662316017574E-18, Group144=4.484538279913559E-26, Group159=3.6839140179535657E-31}	[BCL2L1, CALM1, CCL2, CDK4, EGFR, FOS, ICAM1, IL6, PARP1, PPARG, PRKCE, RELA]	[AACS, AANAT, ABCB4, ABCC2, ABHD2, ACACA, ACOD1, ADCY1, ADCY2, ADCY3, ADCY5, ADCY6, ADCY8, AGTR2, AIFM1, AKAP8, AKR1B1, AKT1, AQP1, AR, AREG, ARG1, ATP2B1, AVP, AVPR1A, BAD, BCL2L1, BGLAP, C00746, C03958, C13662, C16079, C18200, CA9, CACNA1A, CAD, CALM1, CALR, CASP9, CATSPER1, CATSPER2, CATSPER3, CATSPER4, CATSPERB, CATSPERD, CATSPERG, CAV1, CBL, CBX3, CCL19, CCL2, CCL21, CCND1, CCR7, CD38, CDC5L…	TRUE
GO:0001890	GO_BiologicalProcess-GOA_23.02.2017_10h01	placenta development	[3, 4, 5, 6, 7]	[Group031]	11	6.875	2.78408e-11	7.79544e-09	{Group031=1.01839353956105E-12}	{Group031=4.175413512200305E-11}	[CASP8, CSF2, CTSB, EGFR, GRB2, IL10, MAPK1, MAPK14, PPARG, PTGS2, SOD1]	[ABCB4, ADA, ADM, AKT1, ALKBH1, ANG, ARID1A, ARNT, ASCL2, ASH1L, BIRC2, BIRC6, BMP5, BMP7, BMPR2, BPTF, BSG, C00454, C21orf33, CASP8, CCNF, CDKN1B, CDKN1C, CDX2, CDX4, CEBPA, CEBPB, CITED1, CSF2, CTSB, CTSV, CUL7, CXXC1, CYP27B1, CYR61, DAZAP1, DCN, DEDD, DLX3, E2F7, E2F8, EGFR, EGLN1, EOMES, EPAS1, EPOR, ETNK2, ETV2, FBXW8, FGFR2, FOSL1, FZD5, GAB1, GATA2, GCM1, GCM2, GGNBP2, GHRL, GHSR, GJA1, G…	TRUE
GO:0002700	GO_BiologicalProcess-GOA_23.02.2017_10h01	regulation of production of molecular mediator of immune response	[3, 4, 5]	[Group059, Group064, Group126, Group147, Group157, Group161]	10	8.26446	3.80436e-11	1.05761e-08	{Group059=7.565770288482156E-24, Group064=1.2494360185450583E-22, Group126=5.208615599587011E-13, Group147=2.219335197191626E-28, Group157=6.014358351570216E-37, Group161=1.2972628010365007E-28}	{Group059=1.013813218656609E-21, Group064=1.586783743552224E-20, Group126=2.2397047078224147E-11, Group147=3.306809443815523E-26, Group157=9.562829778996643E-35, Group161=1.945894201554751E-26}	[CD40LG, HMOX1, IFNG, IL10, IL2, IL4, IL6, MAPK14, MAPK3, TNF]	[AMH, ANGPT1, APLF, APOA1, APOA2, ATAD5, ATG5, B2M, BCL10, BCL6, BST2, BTK, CD226, CD244, CD28, CD36, CD40, CD40LG, CD74, CD96, CLC, CLCF1, CUEDC2, DEFB103A, EXOSC3, EXOSC6, F2RL1, FCER1G, FFAR2, FFAR3, FOXP3, FZD5, GATA3, GNPDA1, GPI, GPRC5B, HFE, HLA-A, HLA-E, HMOX1, HPX, IFNA2, IFNB1, IFNG, IL10, IL13, IL13RA2, IL2, IL27RA, IL33, IL4, IL4R, IL5, IL6, IRAK3, JAK3, KARS, KLK5, KLK7, LGALS17A, LI…	TRUE
GO:0007249	GO_BiologicalProcess-GOA_23.02.2017_10h01	I-kappaB kinase/NF-kappaB signaling	[4, 5, 6]	[Group072, Group141, Group161]	13	4.72727	4.25086e-11	1.17749e-08	{Group072=3.6656708819119506E-14, Group141=5.055409846520685E-27, Group161=1.2972628010365007E-28}	{Group072=2.162745820328051E-12, Group141=7.330344277454994E-25, Group161=1.945894201554751E-26}	[CASP8, CD4, HMOX1, HSPB1, IL10, IL1B, NFKB1, PRKCB, PRKCE, PTGS2, RELA, STAT1, TNF]	[ABL1, ADIPOQ, AJUBA, AKAP13, AKT1, ANGPT1, ANKRD17, APOL2, APOL3, ASH1L, ATP2C1, AVPR2, AZI2, AZIN2, BCL10, BCL3, BIRC2, BIRC3, BMP7, BRD4, BST2, BTK, BTRC, C18orf32, C1QTNF3, C8orf4, CANT1, CAPN3, CARD11, CARD19, CARD8, CARD9, CASP1, CASP10, CASP8, CC2D1A, CCDC22, CCL19, CCL21, CCR7, CD14, CD27, CD36, CD4, CD40, CD74, CFLAR, CHUK, CLEC6A, CPNE1, CTH, CTNNB1, CXXC5, CYLD, DAB2IP, DDRGK1, DNAJA3,…	TRUE
GO:0045639	GO_BiologicalProcess-GOA_23.02.2017_10h01	positive regulation of myeloid cell differentiation	[4, 5, 6, 7, 8, 9, 10]	[Group013, Group074, Group130, Group161]	9	10.3448	5.01207e-11	1.37832e-08	{Group013=1.8634867332557528E-13, Group074=6.309205599136187E-19, Group130=8.72359720625284E-19, Group161=1.2972628010365007E-28}	{Group013=8.758387646302038E-12, Group074=6.435389711118911E-17, Group130=8.549125262127783E-17, Group161=1.945894201554751E-26}	[CASP8, CD4, CREB1, FOS, IFNG, MAPK14, PRKCA, RB1, TNF]	[ACIN1, ACVR1B, ACVR2A, ANKRD54, ARNT, ATP6AP1, CA2, CALCA, CASP8, CCR1, CD101, CD4, CD74, CREB1, CSF1, CSF3, CTNNBIP1, DCSTAMP, ETS1, FADD, FES, FOS, FOXO3, GATA1, GATA2, GNAS, GPR68, HAX1, HCLS1, HIF1A, HLA-DRB1, HMGB2, HOXA5, ID2, IFNG, IL12B, IL17A, IL20, IL23A, IL23R, IL34, IL5, INHBA, INPP5D, ISG15, JAG1, JUN, KDM1A, KITLG, KLF10, LEF1, LEP, LIF, LOC105369230, MAPK14, MBD4, MED1, MIA3, NCKA…	TRUE
GO:0010212	GO_BiologicalProcess-GOA_23.02.2017_10h01	response to ionizing radiation	[4]	[Group065, Group095, Group120, Group128, Group160]	11	6.50888	5.04182e-11	1.38146e-08	{Group065=3.2052889103204567E-20, Group095=7.872064311268882E-19, Group120=1.0480295495135786E-20, Group128=2.43620398361868E-20, Group160=2.095925753462619E-36}	{Group065=3.6860822468685255E-18, Group095=7.793343668156193E-17, Group120=1.2471551639211586E-18, Group128=2.825996620997669E-18, Group160=3.311562690470938E-34}	[BAX, BCL2, BCL2L1, CASP3, CCL2, CXCL10, GRB2, ICAM1, MAPK14, PARP1, TP53]	[ABCG5, AEN, ALAD, ANTXR1, ANXA1, APOBEC1, ATM, ATR, ATRX, BABAM1, BAK1, BAX, BCL2, BCL2L1, BLM, BRAT1, BRCA1, BRCA2, BRCC3, BRE, CASP3, CBL, CCL2, CCND1, CCND2, CDKN1A, CHEK2, CLK2, CLOCK, CRYAB, CXCL10, CYBA, CYP2R1, DCLRE1C, DCUN1D3, DEPDC1B, DMC1, DNM2, DNMT3A, DNMT3B, ECT2, EEF1D, EGR1, ELK1, ERCC1, ERCC4, ERCC6, ERCC8, EYA1, EYA3, FAM175A, FAM58A, FANCD2, FBXO4, FIGNL1, GADD45A, GATA3, GPX1…	TRUE
GO:0017038	GO_BiologicalProcess-GOA_23.02.2017_10h01	protein import	[4, 5, 6, 7, 8]	[Group068, Group118, Group123, Group147, Group149, Group161]	14	4	6.44398e-11	1.75921e-08	{Group068=2.008691210230321E-18, Group118=4.905106245059882E-26, Group123=1.2336345804534712E-34, Group147=2.219335197191626E-28, Group149=2.409346134030596E-21, Group161=1.2972628010365007E-28}	{Group068=1.908256649718805E-16, Group118=6.916199805534434E-24, Group123=1.9368062913119498E-32, Group147=3.306809443815523E-26, Group149=2.963495744857633E-19, Group161=1.945894201554751E-26}	[APOE, EGFR, IFNG, IL10, IL1B, IL6, MAPK1, MAPK14, MAPK3, PARP1, PIK3R1, PTGS2, SMAD3, TNF]	[ABRA, ADAR, AGT, AGTR2, AGXT, AKAP6, AKR1C3, AKT1, ANAPC2, ANGPT1, APC2, APOD, APOE, ARHGEF5, ARNTL, AXIN2, BAG3, BAMBI, BCL3, BCL6, BMP4, BMP6, BMP7, BMPR1A, C1QTNF3, C21orf33, C8orf4, CABP1, CBLB, CCDC22, CCL19, CD27, CD36, CDH1, CDK1, CDKN1A, CEP57, CFL1, CHCHD4, CHERP, CHORDC1, CHP1, CHP2, CLU, CREB3, CREB3L4, CRY2, CSF3, CTNNB1, CYLD, DAB2, DAB2IP, DACT1, DACT3, DAG1, DDX58, DMAP1, DNLZ, DR…	TRUE
GO:0035094	GO_BiologicalProcess-GOA_23.02.2017_10h01	response to nicotine	[5, 6]	[Group052, Group070, Group092, Group119, Group139, Group155, Group158]	8	13.5593	6.80928e-11	1.85212e-08	{Group052=5.019251775501425E-16, Group070=7.878512232929875E-18, Group092=5.2205935367859703E-23, Group119=1.6445864070363825E-16, Group139=2.373309952007317E-19, Group155=1.5800558011000385E-30, Group158=2.1814444388913482E-30}	{Group052=3.764438831626069E-14, Group070=7.405801498954083E-16, Group092=6.786771597821762E-21, Group119=1.2827773974883783E-14, Group139=2.5157085491277562E-17, Group155=2.4490864917050597E-28, Group158=3.3594244358926764E-28}	[BCL2, CASP3, CREB1, HMOX1, MAPK1, NFKB1, RELA, TNF]	[ABAT, ATP1A2, AVP, BAD, BCL2, C13662, CASP3, CHRFAM7A, CHRNA1, CHRNA2, CHRNA3, CHRNA4, CHRNA5, CHRNA6, CHRNA7, CHRNB1, CHRNB2, CHRNB3, CHRNB4, CHRND, CHRNE, CHRNG, CNR1, CREB1, DRD2, EDN1, FAM58A, GNAT3, GUCY2C, HDAC2, HMOX1, IFNAR1, IL13, KCNJ11, KCNK1, LYPD1, MAPK1, MSX1, ND4, ND6, NFKB1, NKX6-1, NLRP3, NTRK1, PCDHA4, PCDHA@, PDHX, PDX1, PENK, PPARA, PPP1R9B, RELA, SLC6A3, SLC7A11, STAR, TACR1…	TRUE
GO:0009408	GO_BiologicalProcess-GOA_23.02.2017_10h01	response to heat	[3, 4]	[Group020, Group048, Group051, Group061, Group066, Group124, Group152]	11	6.21469	8.31143e-11	2.24409e-08	{Group020=2.552530913936693E-12, Group048=2.4289727240682905E-19, Group051=6.726258273302631E-25, Group061=2.3024050426205298E-26, Group066=7.746471611713783E-23, Group124=7.279489626776259E-30, Group152=3.9478872628846304E-24}	{Group020=9.699617472959434E-11, Group048=2.550421360271705E-17, Group051=9.28223641715763E-23, Group061=3.269415160521152E-24, Group066=9.99294837911078E-21, Group124=1.1064824232699913E-27, Group152=5.329647804894251E-22}	[CCL2, CXCL10, HMOX1, IL1A, IL6, MAPK1, MAPK3, NOS3, PRKCA, PTGS2, SOD1]	[AAAS, ABCC2, AKT1, AKT1S1, ANO1, ANTXR1, ARPP21, ASIC3, ATM, ATR, ATXN3, ATXN8, BAG1, BAG2, BAG3, BAG4, BAG5, C8orf4, CALCA, CAMK2A, CAMK2B, CAMK2D, CAMK2G, CASQ1, CCAR2, CCL2, CCM2, CD14, CD34, CDKN1A, CETN1, CHORDC1, CLPB, CLU, CPB2, CREBBP, CRNN, CRYAB, CXCL10, CXCL12, DAXX, DNAJA1, DNAJA2, DNAJA3, DNAJA4, DNAJB1, DNAJB4, DNAJB6, DNAJC2, DNAJC7, EIF2B1, EIF2B2, EIF2B3, EIF2B4, EIF2B5, EIF2S1,…	TRUE
GO:0032846	GO_BiologicalProcess-GOA_23.02.2017_10h01	positive regulation of homeostatic process	[2, 3, 4, 5]	[Group068, Group075, Group118, Group154, Group161]	12	5.08475	1.10864e-10	2.97117e-08	{Group068=2.008691210230321E-18, Group075=2.6908036920448136E-16, Group118=4.905106245059882E-26, Group154=1.203528415039811E-23, Group161=1.2972628010365007E-28}	{Group068=1.908256649718805E-16, Group075=2.0719188428745066E-14, Group118=6.916199805534434E-24, Group154=1.6006927920029487E-21, Group161=1.945894201554751E-26}	[BAX, CALM1, CD4, CXCL10, CXCL11, EGFR, IL1B, MAPK1, MAPK14, MAPK3, PTGS2, TNF]	[ABAT, ABL1, ACD, ACOX1, ACVR1B, ACVR2A, ADAM8, ADCYAP1R1, ADORA2A, AGT, AGTR2, AGXT, AKAP6, ANKRD54, ANO1, ANTXR1, ANXA1, APEX1, APLN, ARNT, ARRB1, ARTN, ASPH, ATM, ATP6AP1, ATR, ATRX, AURKB, AVP, AVPR1A, BAD, BAK1, BAX, BDKRB1, C00746, C13662, C13705, C16079, C1QTNF12, C2CD2L, CA2, CA7, CALM1, CAPN3, CASQ2, CAV1, CCT2, CCT3, CCT4, CCT5, CCT6A, CCT7, CCT8, CD19, CD4, CEMIP, CFTR, CLIC2, CLSTN1, …	TRUE
GO:0018105	GO_BiologicalProcess-GOA_23.02.2017_10h01	peptidyl-serine phosphorylation	[7, 8, 9]	[Group018, Group062, Group124, Group157, Group161]	13	4.34783	1.20237e-10	3.21034e-08	{Group018=5.1128769996314335E-12, Group062=4.359779768241478E-20, Group124=7.279489626776259E-30, Group157=6.014358351570216E-37, Group161=1.2972628010365007E-28}	{Group018=1.7895069498710018E-10, Group062=4.970148935795285E-18, Group124=1.1064824232699913E-27, Group157=9.562829778996643E-35, Group161=1.945894201554751E-26}	[BAX, BCL2, IFNG, IL6, MAPK1, MAPK14, MAPK3, MAPK8, PRKCA, PRKCB, PRKCE, PTGS2, TNF]	[AKAP9, AKT1, AKT2, AKT3, AMH, ANGPT1, ANTXR1, ARAF, ARRB1, ARRB2, ATM, ATP2B4, ATR, AURKA, AURKB, AURKC, AVP, AXIN1, BAG4, BAK1, BAX, BCAR3, BCL2, BDKRB1, BDKRB2, BRAF, BRSK2, C13662, C18200, CAB39, CAMK1, CAMK1D, CAMK1G, CAMK2A, CAMK2B, CAMK2D, CAMK2G, CAMK4, CAMKK1, CAMKK2, CAMKV, CAPRIN2, CAV1, CCM2, CCNB1, CD44, CDC42, CDC7, CDK1, CDK2, CDK5, CDK5R1, CHEK2, CHUK, CLASP1, CLK1, CLSPN, CNKSR3,…	TRUE
GO:0032768	GO_BiologicalProcess-GOA_23.02.2017_10h01	regulation of monooxygenase activity	[4, 5]	[Group146, Group158, Group161]	8	12.1212	1.72611e-10	4.52241e-08	{Group146=5.380402153400938E-28, Group158=2.1814444388913482E-30, Group161=1.2972628010365007E-28}	{Group146=7.909191165499379E-26, Group158=3.3594244358926764E-28, Group161=1.945894201554751E-26}	[APOE, CALM1, EGFR, IFNG, IL1B, NFKB1, NOS3, TNF]	[ACVR2A, AGTR2, AKT1, APOE, ATP2B4, CALM1, CAV1, CAV3, CDH15, CDH3, CNR1, CNR2, CYGB, CYP27B1, DDAH1, DDAH2, DHFR, DNM2, EGFR, ENG, ESR1, FCER2, GCH1, GCHFR, GDNF, GFI1, GLA, HIF1A, HSP90AA1, HTR2B, IFNG, IL1B, INS, KRAS, LEP, LYPLA1, NANOS3, NAT8, NFKB1, NOD1, NOS1AP, NOS3, NOSIP, NOSTRIN, NPR3, NPRL3, PARK7, PCDHA4, PCDHA6, PCDHA@, POR, PRKG2, PTK2B, PTS, RNU1-93P, SCARB1, SNCA, SPR, TACR1, TER…	TRUE
GO:0046686	GO_BiologicalProcess-GOA_23.02.2017_10h01	response to cadmium ion	[5]	[Group053, Group155, Group158]	8	12.1212	1.72611e-10	4.52241e-08	{Group053=9.576111518151522E-14, Group155=1.5800558011000385E-30, Group158=2.1814444388913482E-30}	{Group053=4.979577989438792E-12, Group155=2.4490864917050597E-28, Group158=3.3594244358926764E-28}	[CAT, EGFR, FOS, HMOX1, MAPK1, MAPK3, MAPK8, SOD1]	[ABCB4, AKR1C3, AKT1, ALAD, ARG1, ATP7A, B2M, C16051, CAT, CDK1, CDKN1B, CHUK, CRAT, CYB5A, CYBB, CYP1A2, DAXX, DTYMK, EGFR, FAM58A, FOS, GCLC, GLYAT, GNPDA1, GPI, GSN, GSS, GUCY2C, HAAO, HMOX1, HSF1, JUN, MAPK1, MAPK3, MAPK8, MAPK9, MELTF, MMP9, MT1A, MT1E, MT1F, MT1G, MT1H, MT1X, MT3, MTF1, MYT1, NCF1, NPC1, NUDT1, OGG1, PCNA, PPP5C, PRNP, PTH, PTRH2, SLC30A1, SLC34A1, SOD1, SOD2, SORD, SPARC, …	TRUE
GO:0097193	GO_BiologicalProcess-GOA_23.02.2017_10h01	intrinsic apoptotic signaling pathway	[4, 5, 6, 7]	[Group096, Group107, Group121, Group155, Group160]	13	4.22078	1.73475e-10	4.5277e-08	{Group096=5.896738035562535E-21, Group107=9.28476033582257E-18, Group121=8.591502166967616E-20, Group155=1.5800558011000385E-30, Group160=2.095925753462619E-36}	{Group096=7.135053023030667E-19, Group107=8.63482711231499E-16, Group121=9.278822340325026E-18, Group155=2.4490864917050597E-28, Group160=3.311562690470938E-34}	[BAX, BCL2, BCL2L1, CASP3, HMOX1, HSPB1, MCL1, PARP1, PIK3R1, PTGS2, SOD1, TNF, TP53]	[ABL1, ACKR3, AEN, AIFM1, AKT1, AMH, ANKRD2, APAF1, APOPT1, ARHGEF2, ARL6IP5, ARTN, ATAD5, ATF4, ATM, ATP2A1, BAD, BAG5, BAG6, BAK1, BAX, BBC3, BCAP31, BCL2, BCL2L1, BCL2L10, BCL2L11, BCL2L12, BCL3, BCLAF1, BDKRB1, BDKRB2, BID, BMF, BNIP3, BOK, BRCA1, BRCA2, BRSK2, C18200, CASP12, CASP2, CASP3, CASP4, CASP9, CAV1, CCAR2, CD24, CD44, CD74, CDIP1, CDKN1A, CDKN2D, CEBPB, CHAC1, CHEK2, CIDEB, CLU, CN…	TRUE
GO:0009411	GO_BiologicalProcess-GOA_23.02.2017_10h01	response to UV	[5]	[Group065, Group096, Group109, Group128, Group158, Group160]	10	7.04225	1.87327e-10	4.87049e-08	{Group065=3.2052889103204567E-20, Group096=5.896738035562535E-21, Group109=9.5049965209969E-19, Group128=2.43620398361868E-20, Group158=2.1814444388913482E-30, Group160=2.095925753462619E-36}	{Group065=3.6860822468685255E-18, Group096=7.135053023030667E-19, Group109=9.219846625366993E-17, Group128=2.825996620997669E-18, Group158=3.3594244358926764E-28, Group160=3.311562690470938E-34}	[BAX, BCL2, CASP3, CAT, EGFR, MAPK8, PIK3R1, PTGS2, RELA, TP53]	[ACTR5, AKT1, ANTXR1, AQP1, ATF4, ATR, AURKB, BAK1, BAX, BCL2, BCL3, BMF, BRCA2, BRSK1, CASP3, CASP7, CASP9, CAT, CCAR2, CCND1, CDC25A, CDKN1A, CDKN2D, CERS1, CHEK1, CIRBP, CNRIP1, COPS9, CRAT, CREBBP, CRIP1, CUL4B, DCUN1D3, DDB1, DDB2, DTL, EGFR, EIF2AK4, EIF2S1, ELANE, EP300, ERCC1, ERCC2, ERCC3, ERCC4, ERCC5, ERCC6, ERCC8, FBXW7, FEN1, FMR1, FMR1-IT1, GLYAT, GPX1, GTF2H2, HIST3H2A, HMGN1, HUS1…	TRUE
GO:1905475	GO_BiologicalProcess-GOA_23.02.2017_10h01	regulation of protein localization to membrane	[5, 6]	[Group030, Group096, Group109, Group160, Group161]	10	6.49351	4.17086e-10	1.07608e-07	{Group030=6.554902454475491E-13, Group096=5.896738035562535E-21, Group109=9.5049965209969E-19, Group160=2.095925753462619E-36, Group161=1.2972628010365007E-28}	{Group030=2.7530590308797062E-11, Group096=7.135053023030667E-19, Group109=9.219846625366993E-17, Group160=3.311562690470938E-34, Group161=1.945894201554751E-26}	[BCL2, BCL2L1, CASP8, CCL2, EGFR, IFNG, MAPK8, PIK3R1, PRKCE, TP53]	[ACSL3, AGR2, AKR1B1, AKT1, AKT2, ANK3, ANXA13, AP2M1, APPL1, AR, AREG, ARF6, ARHGEF16, BAD, BBC3, BCL2, BCL2L1, BCL2L11, BID, BMF, C2CD5, CACNA1A, CASP8, CCL2, CDH2, CDK5, CDK5R1, CEMIP, CHORDC1, CHP1, CIB1, CLIP3, CLTC, CNST, CRIPT, CSK, DAB2, DLG1, DMTN, DPP10, DYNLL1, DYNLL2, E2F1, EGFR, EPHA2, ERBB2, EZR, FIS1, FYN, FZD9, GBP1, GDI1, GOPC, GPER1, GSN, GZMB, HPCA, IFNG, INPP5K, ITGA3, ITGB1, …	TRUE
GO:0002526	GO_BiologicalProcess-GOA_23.02.2017_10h01	acute inflammatory response	[5]	[Group081, Group113, Group123, Group127, Group132, Group152, Group157, Group161]	10	6.36943	5.04157e-10	1.29568e-07	{Group081=2.3550023519198475E-19, Group113=4.548470078238836E-20, Group123=1.2336345804534712E-34, Group127=9.796760338000124E-17, Group132=1.6327869166520973E-27, Group152=3.9478872628846304E-24, Group157=6.014358351570216E-37, Group161=1.2972628010365007E-28}	{Group081=2.5198525165542367E-17, Group113=5.094286487627496E-18, Group123=1.9368062913119498E-32, Group127=7.9353758737801E-15, Group132=2.383868898312062E-25, Group152=5.329647804894251E-22, Group157=9.562829778996643E-35, Group161=1.945894201554751E-26}	[CXCL10, ICAM1, IL1A, IL1B, IL4, IL6, PIK3CG, PPARG, PTGS2, TNF]	[A2M, ACVR1, ADAM8, ADCYAP1, ADORA1, AHSG, AKR1C1, ALOX5AP, ANO6, APCS, APOA2, APOL2, ASH1L, B4GALT1, BTK, C18200, C1QBP, C2, C3, C3AR1, C4A, C4B, C4BPA, C4BPB, C5, C5AR1, C5AR2, C6, C7, C8A, C8B, C8G, C9, CCM2, CCR7, CD163, CD46, CD55, CD59, CD6, CEBPB, CFB, CFH, CFI, CFP, CNR1, CNTN1, CR1, CREB3L3, CRP, CSRP1, CTNNBIP1, CXCL10, DEAF1, DEFB1, DLC1, EDNRB, EHHADH, EIF2AK1, EIF2AK2, ELANE, EPHB6, …	TRUE
GO:0014074	GO_BiologicalProcess-GOA_23.02.2017_10h01	response to purine-containing compound	[4, 5]	[Group041, Group081, Group097, Group099, Group113, Group116, Group152, Group159, Group161]	10	6.36943	5.04157e-10	1.29568e-07	{Group041=1.01839353956105E-12, Group081=2.3550023519198475E-19, Group097=5.641539777391449E-38, Group099=5.555412196230995E-16, Group113=4.548470078238836E-20, Group116=2.07901236730568E-29, Group152=3.9478872628846304E-24, Group159=2.3614833448420293E-33, Group161=1.2972628010365007E-28}	{Group041=4.175413512200305E-11, Group081=2.5198525165542367E-17, Group097=9.026463643826318E-36, Group099=4.055450903248627E-14, Group113=5.094286487627496E-18, Group116=3.1393086746315765E-27, Group152=5.329647804894251E-22, Group159=3.6839140179535657E-31, Group161=1.945894201554751E-26}	[CCL2, FOS, IL1B, IL6, PIK3CG, PPARG, PTGS2, RELA, SOD1, STAT1]	[AACS, AANAT, ACOD1, ADIPOQ, ADORA2A, ADSS, AGXT, AKAP6, AKAP7, AKAP9, ALDH3A1, APEX1, APP, AQP1, AQP8, AQP9, AREG, ASPH, BIRC2, BRAF, BSG, C00746, C12orf76, CAD, CARM1, CASP1, CASQ2, CCL2, CDO1, CFTR, CIB2, CITED1, CLU, CNGA3, COL1A1, CPS1, CRHBP, CYP21A2, DFFB, DGKQ, DHODH, DMTN, DNMT3B, DNTT, DUOX1, DUOX2, DUSP1, DUSP12, EEF2K, EZR, FAM58A, FDX1, FOS, FOSB, FOSL1, GPD1, GSTM2, GUCY2C, HCN1, HC…	TRUE
GO:0032642	GO_BiologicalProcess-GOA_23.02.2017_10h01	regulation of chemokine production	[4, 5]	[Group141, Group145, Group148, Group151, Group152, Group157, Group160, Group161]	8	10.3896	6.11324e-10	1.55276e-07	{Group141=5.055409846520685E-27, Group145=8.291268333444812E-26, Group148=7.862789791132838E-14, Group151=5.6806760749081155E-21, Group152=3.9478872628846304E-24, Group157=6.014358351570216E-37, Group160=2.095925753462619E-36, Group161=1.2972628010365007E-28}	{Group141=7.330344277454994E-25, Group145=1.1607775666822736E-23, Group148=4.2459064872117324E-12, Group151=6.930424811387901E-19, Group152=5.329647804894251E-22, Group157=9.562829778996643E-35, Group160=3.311562690470938E-34, Group161=1.945894201554751E-26}	[HMOX1, IFNG, IL10, IL1A, IL1B, IL4, IL6, TNF]	[ACKR1, ADAM17, ADCYAP1, ADIPOQ, ADORA2B, AGER, ALOX15B, AMH, APOD, AZU1, C1QTNF3, C5, CD74, CHIA, CSF1R, DDX3X, EGR1, EHHADH, EIF2AK2, ELANE, EPHA2, ERBIN, F2RL1, FFAR2, FFAR3, GSTP1, HAVCR2, HIF1A, HMOX1, IFNG, IL10, IL1A, IL1B, IL1RL1, IL33, IL4, IL4R, IL6, IL6R, KLF4, LBP, LCP1, LGALS9, LPL, MAP2K5, MAVS, MBL2, MBP, MEFV, MIF, MUL1, MYD88, NR1H4, POSTN, PRG2, PYCARD, RIPK2, RPSA, S100A8, S100…	TRUE
GO:0043200	GO_BiologicalProcess-GOA_23.02.2017_10h01	response to amino acid	[4, 5]	[Group052, Group089, Group112, Group119, Group129, Group144, Group156, Group158, Group159, Group161]	9	7.56302	8.56769e-10	2.16762e-07	{Group052=5.019251775501425E-16, Group089=2.0657438308566865E-17, Group112=2.0443419021937814E-23, Group119=1.6445864070363825E-16, Group129=5.489879487929511E-20, Group144=3.030093432374026E-28, Group156=2.39789469623427E-30, Group158=2.1814444388913482E-30, Group159=2.3614833448420293E-33, Group161=1.2972628010365007E-28}	{Group052=3.764438831626069E-14, Group089=1.838512009462451E-15, Group112=2.6780878918738537E-21, Group119=1.2827773974883783E-14, Group129=6.0937662316017574E-18, Group144=4.484538279913559E-26, Group156=3.668778885238433E-28, Group158=3.3594244358926764E-28, Group159=3.6839140179535657E-31, Group161=1.945894201554751E-26}	[BCL2L1, CASP3, CCL2, CREB1, EGFR, ICAM1, IL6, RELA, TNF]	[AARS, ABCB4, AIFM1, ALAD, ARG1, ASNS, ATP7A, BAD, BAIAP2, BCL11A, BCL2L1, C15906, C1QTNF1, CACNA1A, CAPN2, CASP3, CASTOR1, CCL2, CDKN1B, CDO1, CEBPB, CHUK, COL16A1, COL1A1, COL1A2, COL3A1, COL4A1, COL4A6, COL5A2, COL6A1, CPEB1, CPEB3, CPEB4, CPS1, CREB1, CRLS1, CTGF, CYBA, CYBB, CYP21A2, DHODH, DNMT1, DNMT3A, EDN1, EGFR, F7, FGF21, GCLC, GCLM, GIP, GLRA1, GLRA2, GLRA3, GLRA4, GLRB, GNAI2, GPRC6A…	TRUE
GO:0034614	GO_BiologicalProcess-GOA_23.02.2017_10h01	cellular response to reactive oxygen species	[5]	[Group037, Group118, Group143, Group147, Group149, Group155, Group156, Group158, Group161]	10	6.0241	8.70449e-10	2.19353e-07	{Group037=6.61054049147753E-17, Group118=4.905106245059882E-26, Group143=1.0304610897274216E-26, Group147=2.219335197191626E-28, Group149=2.409346134030596E-21, Group155=1.5800558011000385E-30, Group156=2.39789469623427E-30, Group158=2.1814444388913482E-30, Group161=1.2972628010365007E-28}	{Group037=5.5528540128411255E-15, Group118=6.916199805534434E-24, Group143=1.4735593583102129E-24, Group147=3.306809443815523E-26, Group149=2.963495744857633E-19, Group155=2.4490864917050597E-28, Group156=3.668778885238433E-28, Group158=3.3594244358926764E-28, Group161=1.945894201554751E-26}	[EGFR, FOS, IL6, MAPK1, MAPK3, MAPK8, NOS3, RELA, SOD1, TNF]	[ABL1, ADPRHL2, AIFM1, AKR1B1, AKR1C3, AKT1, ANXA1, APEX1, APOA4, AQP1, ARG1, ATP7A, AXL, BECN1, BMP7, BNIP3, BTK, CAMKK2, CBX8, CCNA2, CCS, CD36, CDK1, CDK2, CFL1, CFLAR, CHUK, CLU, CRK, CRYGD, CST3, CYP1B1, DHFR, DNM2, DPEP1, ECT2, EGFR, ENDOG, ETS1, EZH2, FABP1, FBLN5, FBXO7, FER, FOS, FOXO1, FOXO3, FXN, GCH1, GLRX2, GPR37, GPR37L1, GUCY1B3, HDAC2, HDAC6, HGF, HNRNPD, HSF1, HSP90B2P, HSPH1, IL…	TRUE
GO:0002673	GO_BiologicalProcess-GOA_23.02.2017_10h01	regulation of acute inflammatory response	[5, 6, 7]	[Group081, Group113, Group123, Group142, Group150, Group152, Group153, Group157, Group161]	8	9.7561	1.01966e-09	2.55934e-07	{Group081=2.3550023519198475E-19, Group113=4.548470078238836E-20, Group123=1.2336345804534712E-34, Group142=7.17431876360572E-19, Group150=6.47380039518465E-25, Group152=3.9478872628846304E-24, Group153=9.632572699614655E-25, Group157=6.014358351570216E-37, Group161=1.2972628010365007E-28}	{Group081=2.5198525165542367E-17, Group113=5.094286487627496E-18, Group123=1.9368062913119498E-32, Group142=7.174318763605721E-17, Group150=8.998582549306663E-23, Group152=5.329647804894251E-22, Group153=1.3196624598472077E-22, Group157=9.562829778996643E-35, Group161=1.945894201554751E-26}	[CXCL10, IL1B, IL4, IL6, PIK3CG, PPARG, PTGS2, TNF]	[A2M, ADAM8, ADCYAP1, ADORA1, AKR1C1, ALOX5AP, APCS, ASH1L, BTK, C1QBP, C2, C3, C3AR1, C4A, C4B, C4BPA, C4BPB, C5, C5AR1, C5AR2, C6, C7, C8A, C8B, C8G, C9, CCM2, CCR7, CD46, CD55, CD59, CFB, CFH, CFI, CFP, CNR1, CR1, CREB3L3, CXCL10, DEAF1, EDNRB, F12, FCER1A, FCER1G, FFAR2, FFAR3, GSTP1, HNRNPC, IGLC7, IL1B, IL20RB, IL4, IL6, IL6ST, INS, KLKB1, MASP1, NLRP3, NPY5R, OSM, OSMR, PARK7, PCDHA4, PCDH…	TRUE
GO:0071674	GO_BiologicalProcess-GOA_23.02.2017_10h01	mononuclear cell migration	[3, 5, 6, 7]	[Group074, Group091, Group094, Group106, Group147, Group150, Group157, Group161]	8	9.63856	1.12495e-09	2.81238e-07	{Group074=6.309205599136187E-19, Group091=1.9643660437894692E-20, Group094=1.4395324297023587E-22, Group106=3.536637698216287E-14, Group147=2.219335197191626E-28, Group150=6.47380039518465E-25, Group157=6.014358351570216E-37, Group161=1.2972628010365007E-28}	{Group074=6.435389711118911E-17, Group091=2.3179519316715738E-18, Group094=1.813810861424972E-20, Group106=2.1219826189297723E-12, Group147=3.306809443815523E-26, Group150=8.998582549306663E-23, Group157=9.562829778996643E-35, Group161=1.945894201554751E-26}	[CCL2, CXCL10, IL4, IL6, MAPK14, MAPK3, SERPINE1, TNF]	[AIF1, ANO6, ANXA1, BMP5, C3AR1, C5AR1, CALCA, CCL1, CCL11, CCL13, CCL14, CCL15, CCL15-CCL14, CCL16, CCL17, CCL18, CCL19, CCL2, CCL20, CCL21, CCL22, CCL23, CCL24, CCL25, CCL26, CCL3, CCL3L1, CCL4, CCL4L1, CCL5, CCL7, CCL8, CCR1, CCR2, CMKLR1, CREB3, CREB3L4, CSF1, CX3CL1, CXCL10, CXCL12, CXCL17, FLT1, GREM1, HIST1H2BA, HMGB1, IL4, IL6, IL6R, JAML, KARS, LGALS3, LYN, MAPK14, MAPK3, NBL1, NOV, PDGF…	TRUE
GO:0048660	GO_BiologicalProcess-GOA_23.02.2017_10h01	regulation of smooth muscle cell proliferation	[4, 5]	[Group049, Group077, Group087, Group142, Group145, Group151, Group153, Group156, Group159, Group161]	9	7.31707	1.15143e-09	2.86707e-07	{Group049=5.259467498051892E-14, Group077=1.4816838565081345E-16, Group087=1.685885468660308E-13, Group142=7.17431876360572E-19, Group145=8.291268333444812E-26, Group151=5.6806760749081155E-21, Group153=9.632572699614655E-25, Group156=2.39789469623427E-30, Group159=2.3614833448420293E-33, Group161=1.2972628010365007E-28}	{Group049=2.9978964738895782E-12, Group077=1.1705302466414263E-14, Group087=8.26083879643551E-12, Group142=7.174318763605721E-17, Group145=1.1607775666822736E-23, Group151=6.930424811387901E-19, Group153=1.3196624598472077E-22, Group156=3.668778885238433E-28, Group159=3.6839140179535657E-31, Group161=1.945894201554751E-26}	[EGFR, HMOX1, IFNG, IL10, IL6, PPARG, PTGS2, STAT1, TNF]	[ABCC4, ADIPOQ, AGT, AGXT, AIF1, AKR1B1, AKT1, ALOX12, ANG, APOD, BMP4, BMPR1A, CALCRL, CAMK2D, CCL5, CDH13, CDKN1B, CNN1, COMT, CTNNB1, CTNNBIP1, CYBA, DDX39B, EDN1, EGFR, ELANE, EREG, ERN1, FGFR2, FOXP1, GPER1, GSTP1, HBEGF, HDAC4, HES5, HMGCR, HMOX1, HPGD, HTR1B, ID2, IFNG, IGF1, IGFBP3, IGFBP5, IL10, IL12A, IL12B, IL13, IL15, IL18, IL6, IL6R, ILK, IRAK1, IRAK4, ITGA2, JAK2, JUN, KLF4, MAP3K5,…	TRUE
GO:0070555	GO_BiologicalProcess-GOA_23.02.2017_10h01	response to interleukin-1	[5]	[Group061, Group066, Group086, Group101, Group103, Group157, Group159]	9	7.14286	1.42758e-09	3.52612e-07	{Group061=2.3024050426205298E-26, Group066=7.746471611713783E-23, Group086=1.2095964201304352E-16, Group101=6.970265301625163E-27, Group103=4.578328693136612E-19, Group157=6.014358351570216E-37, Group159=2.3614833448420293E-33}	{Group061=3.269415160521152E-24, Group066=9.99294837911078E-21, Group086=9.676771361043482E-15, Group101=1.0037182034340234E-24, Group103=4.7156785539307104E-17, Group157=9.562829778996643E-35, Group159=3.6839140179535657E-31}	[CCL2, CXCL8, ICAM1, IL1A, IL6, MAPK3, NFKB1, PRKCA, RELA]	[ABCC2, ACOD1, ADAMTS12, ADAMTS7, AES, ANKRD1, ANXA1, C18200, CACTIN, CAMP, CCL1, CCL11, CCL13, CCL14, CCL15, CCL15-CCL14, CCL16, CCL17, CCL18, CCL19, CCL2, CCL20, CCL21, CCL22, CCL23, CCL24, CCL25, CCL26, CCL3, CCL3L1, CCL4, CCL4L1, CCL5, CCL7, CCL8, CD38, CD40, CEBPB, CFL1, CHAMP1, CHI3L1, CITED1, CX3CL1, CXCL8, CYBA, DAB2IP, EDN1, EGR1, EPO, EPX, ETS1, FGB, FGG, GCLC, GHR, HAS2, HDAC4, HIF1A, …	TRUE
GO:0043406	GO_BiologicalProcess-GOA_23.02.2017_10h01	positive regulation of MAP kinase activity	[6, 7, 8, 9, 10, 11, 12]	[Group033, Group068, Group118, Group124, Group147, Group149, Group155, Group161]	11	4.62185	1.94906e-09	4.7752e-07	{Group033=2.356220841852683E-10, Group068=2.008691210230321E-18, Group118=4.905106245059882E-26, Group124=7.279489626776259E-30, Group147=2.219335197191626E-28, Group149=2.409346134030596E-21, Group155=1.5800558011000385E-30, Group161=1.2972628010365007E-28}	{Group033=5.183685852075903E-9, Group068=1.908256649718805E-16, Group118=6.916199805534434E-24, Group124=1.1064824232699913E-27, Group147=3.306809443815523E-26, Group149=2.963495744857633E-19, Group155=2.4490864917050597E-28, Group161=1.945894201554751E-26}	[CD40LG, CD81, EGFR, IL1B, IL6, MAPK1, MAPK14, MAPK3, PIK3CG, SOD1, TNF]	[ADAM8, ADORA2B, ADRA2A, ADRA2B, ADRA2C, AGER, AJUBA, AKAP13, ALK, AMH, APP, ARHGEF5, ARHGEF7, ARRB1, AVPI1, AXIN1, BIRC7, BMP2, BUD31, C1QTNF2, C5, C5AR1, CCL19, CD24, CD40, CD40LG, CD74, CD81, CDK1, CHRFAM7A, CHRNA7, CSK, CSPG4, CXCL17, CXCR4, DAB2IP, DAXX, DBNL, DRD4, DUSP19, DUSP5, DUSP6, DUSP7, DUSP9, DVL2, DVL3, EDN1, EDN3, EFNA1, EGF, EGFR, ELANE, EPGN, EPHA4, ERBB2, ERCC6, ERN1, ERN2, ERP…	TRUE
GO:0002637	GO_BiologicalProcess-GOA_23.02.2017_10h01	regulation of immunoglobulin production	[4, 5, 6]	[Group126, Group132, Group138, Group161]	7	12.5	2.04016e-09	4.978e-07	{Group126=5.208615599587011E-13, Group132=1.6327869166520973E-27, Group138=2.2350029818032858E-20, Group161=1.2972628010365007E-28}	{Group126=2.2397047078224147E-11, Group132=2.383868898312062E-25, Group138=2.6149534887098442E-18, Group161=1.945894201554751E-26}	[CD40LG, IFNG, IL10, IL2, IL4, IL6, TNF]	[APLF, ATAD5, BCL6, CD28, CD40, CD40LG, CLCF1, EXOSC3, EXOSC6, FOXP3, GNPDA1, GPI, HLA-E, HPX, IFNG, IL10, IL13, IL13RA2, IL2, IL27RA, IL33, IL4, IL4R, IL5, IL6, MLH1, MSH2, MSH6, MZB1, NDFIP1, NSD2, PAXIP1, PKN1, POLR2D, PRKDC, RBP4, SASH3, STAT6, STX4, SUPT6H, TANK, TBX21, TFRC, TGFB1, THOC1, TMBIM6, TNF, TNFRSF4, TNFSF13, TNFSF4, TRAF2, TRAF6, UNG, XBP1, XBP1P1, XCL1]	TRUE
GO:0033002	GO_BiologicalProcess-GOA_23.02.2017_10h01	muscle cell proliferation	[3]	[Group049, Group087, Group142, Group145, Group151, Group156, Group159, Group161]	10	5.46448	2.24894e-09	5.46492e-07	{Group049=5.259467498051892E-14, Group087=1.685885468660308E-13, Group142=7.17431876360572E-19, Group145=8.291268333444812E-26, Group151=5.6806760749081155E-21, Group156=2.39789469623427E-30, Group159=2.3614833448420293E-33, Group161=1.2972628010365007E-28}	{Group049=2.9978964738895782E-12, Group087=8.26083879643551E-12, Group142=7.174318763605721E-17, Group145=1.1607775666822736E-23, Group151=6.930424811387901E-19, Group156=3.668778885238433E-28, Group159=3.6839140179535657E-31, Group161=1.945894201554751E-26}	[EGFR, HMOX1, IFNG, IL10, IL6, MAPK14, PPARG, PTGS2, STAT1, TNF]	[ABCC4, ADIPOQ, AGT, AGXT, AIF1, AKR1B1, AKT1, ALOX12, ANG, ANGPT1, APOD, ARID2, BMP10, BMP4, BMPR1A, C3orf58, CALCRL, CAMK2D, CCL5, CCNB1, CDH13, CDK1, CDKN1B, CFLAR, CNN1, COMT, CTNNB1, CTNNBIP1, CYBA, DDX39B, EDN1, EGFR, ELANE, ERBB4, EREG, ERN1, FGF13, FGF2, FGF20, FGF9, FGFR1, FGFR2, FOXC1, FOXC2, FOXP1, GARS, GATA6, GJA1, GPER1, GSTP1, HBEGF, HDAC4, HES5, HEY2, HMGCR, HMOX1, HPGD, HTR1B, ID…	TRUE
GO:0033619	GO_BiologicalProcess-GOA_23.02.2017_10h01	membrane protein proteolysis	[5, 6]	[Group072, Group102, Group105, Group119, Group126, Group132, Group139, Group141, Group148, Group161]	7	12.2807	2.31864e-09	5.6111e-07	{Group072=3.6656708819119506E-14, Group102=5.266614387496279E-16, Group105=7.609187719694851E-20, Group119=1.6445864070363825E-16, Group126=5.208615599587011E-13, Group132=1.6327869166520973E-27, Group139=2.373309952007317E-19, Group141=5.055409846520685E-27, Group148=7.862789791132838E-14, Group161=1.2972628010365007E-28}	{Group072=2.162745820328051E-12, Group102=3.897294646747246E-14, Group105=8.370106491664335E-18, Group119=1.2827773974883783E-14, Group126=2.2397047078224147E-11, Group132=2.383868898312062E-25, Group139=2.5157085491277562E-17, Group141=7.330344277454994E-25, Group148=4.2459064872117324E-12, Group161=1.945894201554751E-26}	[APOE, IFNG, IL10, IL1B, NFKB1, RELA, TNF]	[ADAM10, ADAM17, ADAM19, ADAM8, ADAM9, ADRA2A, APH1A, APH1B, APOE, BACE1, BACE2, CTSH, DAG1, ERAP1, FURIN, GPLD1, HM13, IFNG, IL10, IL1B, LRIG2, MBTPS1, MBTPS2, MYH9, NAPSA, NCSTN, NFKB1, NGFR, NRDC, P2RX7, PACSIN3, PARL, PRKCQ, PSEN1, PSEN2, PSENEN, PTPN3, RBMX, RELA, RET, RGMA, RHBDD1, SH3D19, SNX33, SNX9, SPPL2A, SPPL2B, SPPL3, TGFB1, TIMP1, TIMP2, TIMP3, TIMP4, TMPRSS6, TNF, TNFRSF1B, TRAF6]	TRUE
GO:0042100	GO_BiologicalProcess-GOA_23.02.2017_10h01	B cell proliferation	[5, 6, 7]	[Group134, Group136, Group137, Group161]	8	8.60215	2.81654e-09	6.73154e-07	{Group134=5.416335777720201E-14, Group136=1.8509521382527809E-22, Group137=1.0770586316843705E-11, Group161=1.2972628010365007E-28}	{Group134=3.0331480355233125E-12, Group136=2.313690172815976E-20, Group137=3.231175895053112E-10, Group161=1.945894201554751E-26}	[BAX, BCL2, CASP3, CD40LG, CD81, IL10, IL2, IL4]	[ABL1, ADA, AHR, AMH, ATAD5, ATM, BAX, BCL2, BCL6, BTK, CARD11, CASP3, CD180, CD300A, CD38, CD40, CD40LG, CD74, CD79A, CD81, CDKN1A, CDKN2A, CHRNB2, CLCF1, CR2, CTLA4, CTPS1, GAPT, GPR183, HSPD1, IFNA1, IFNA10, IFNA14, IFNA16, IFNA17, IFNA2, IFNA21, IFNA4, IFNA5, IFNA6, IFNA7, IFNA8, IFNB1, IFNE, IFNK, IFNW1, IKZF3, IL10, IL13, IL2, IL21, IL4, IL5, IL7, IL7R, INPP5D, IRS2, LEF1, LYN, MEF2C, MIF, …	TRUE
GO:0046813	GO_BiologicalProcess-GOA_23.02.2017_10h01	receptor-mediated virion attachment to host cell	[5, 6, 7]	[Group022, Group058, Group073, Group088]	4	66.6667	3.1983e-09	7.61196e-07	{Group022=1.0673875035391895E-13, Group058=1.7223391850378113E-12, Group073=3.0729508041895474E-17, Group088=8.18427208747288E-14}	{Group022=5.336937517695947E-12, Group058=6.889356740151245E-11, Group073=2.6427376916030108E-15, Group088=4.337664206360627E-12}	[ACE, ACE2, CD81, ICAM1]	[ACE, ACE2, CD81, GAS6, ICAM1, LRRC15]	TRUE
GO:0002262	GO_BiologicalProcess-GOA_23.02.2017_10h01	myeloid cell homeostasis	[2, 5]	[Group043, Group092, Group131, Group160, Group161]	9	6.33803	4.12224e-09	9.72849e-07	{Group043=7.255481590296722E-10, Group092=5.2205935367859703E-23, Group131=8.965170180080678E-17, Group160=2.095925753462619E-36, Group161=1.2972628010365007E-28}	{Group043=1.1608770544474755E-8, Group092=6.786771597821762E-21, Group131=7.351439547666156E-15, Group160=3.311562690470938E-34, Group161=1.945894201554751E-26}	[BAX, CASP3, G6PD, HMOX1, IFNG, IL6, MAPK14, RB1, SOD1]	[ACIN1, ACVR1B, ACVR2A, ADAM17, ADAR, ADD1, AHSP, ALAS2, AMPD3, ANKRD54, ANXA1, ARID4A, ARNT, ATPIF1, AXL, B2M, BAK1, BAP1, BAX, BCL2L11, BCL6, BMP4, C18200, C19313, CASP3, CDK6, CEBPG, CLSTN1, DMTN, DNASE2, DYRK3, EPAS1, EPB42, EPO, EPX, ERCC2, ETS1, ETV2, FCAR, FCER1G, FLVCR1, FOXO3, FOXP3, G6PD, GAS2L1, GATA1, GATA2, GATA3, GNPDA1, GPI, HBZ, HCAR2, HCLS1, HIF1A, HIPK2, HMGB1, HMGB2, HMOX1, HOX…	TRUE
GO:0032355	GO_BiologicalProcess-GOA_23.02.2017_10h01	response to estradiol	[4, 5]	[Group067, Group083, Group112, Group159, Group161]	9	6.29371	4.38562e-09	1.03062e-06	{Group067=3.8968317253609067E-17, Group083=9.283507481187041E-23, Group112=2.0443419021937814E-23, Group159=2.3614833448420293E-33, Group161=1.2972628010365007E-28}	{Group067=3.3123069665567706E-15, Group083=1.1882889575919413E-20, Group112=2.6780878918738537E-21, Group159=3.6839140179535657E-31, Group161=1.945894201554751E-26}	[CASP3, CASP8, CAT, CCL2, CD4, EGFR, IL10, IL6, PTGS2]	[ABCB4, ADCYAP1R1, AIFM1, ALDH1A2, ANXA1, APOB, AREG, ARNT2, ARPC1B, BAD, BID, BMP7, C00746, C18201, CALR, CASP3, CASP8, CASP9, CAT, CCDC62, CCL2, CCNA2, CCND1, CD38, CD4, CDKN1B, CFLAR, COL1A1, CRAT, CRHBP, CRYAB, CST3, CTGF, CTNNB1, CYP1A2, DDX18, DHH, DNMT3A, DNMT3B, DPEP1, DPEP2, DPEP3, DUSP1, DUSP12, EEF2, EGFR, ENDOG, ESR1, ESR2, ESRRA, ETS1, EZH2, F7, FGF10, FOXA1, GH1, GHR, GJB2, GLYAT, G…	TRUE
GO:0097746	GO_BiologicalProcess-GOA_23.02.2017_10h01	regulation of blood vessel diameter	[6]	[Group045, Group058, Group073, Group088, Group158, Group160]	9	6.29371	4.38562e-09	1.03062e-06	{Group045=3.066582739010323E-17, Group058=1.7223391850378113E-12, Group073=3.0729508041895474E-17, Group088=8.18427208747288E-14, Group158=2.1814444388913482E-30, Group160=2.095925753462619E-36}	{Group045=2.667926982938981E-15, Group058=6.889356740151245E-11, Group073=2.6427376916030108E-15, Group088=4.337664206360627E-12, Group158=3.3594244358926764E-28, Group160=3.311562690470938E-34}	[ACE, ACE2, APOE, EGFR, HMOX1, ICAM1, NOS3, PTGS2, SOD1]	[ACE, ACE2, ACTA2, ADCY6, ADCYAP1, ADM, ADORA1, ADORA2A, ADORA2B, ADRA1A, ADRA1B, ADRA1D, ADRA2A, ADRA2B, ADRA2C, ADRB1, ADRB2, ADRB3, AGT, AGTR1, AGTR2, AGXT, AKT1, ALOX12, APLN, APOE, ARHGAP42, ASIC2, ATG5, ATP1A2, AVP, AVPR1A, AVPR1B, AVPR2, BBS2, BDKRB1, BDKRB2, BMPR2, C13662, C13705, C19897, CALCA, CASR, CAV1, CD38, CHGA, CHRM1, CHRM3, CPS1, CRP, CSRP1, CYP21A2, DBH, DHX15, DHX34, DHX8, DOCK…	TRUE
GO:0031099	GO_BiologicalProcess-GOA_23.02.2017_10h01	regeneration	[3]	[Group087, Group133, Group159, Group160, Group161]	10	5.07614	4.5857e-09	1.07305e-06	{Group087=1.685885468660308E-13, Group133=6.575467853059808E-19, Group159=2.3614833448420293E-33, Group160=2.095925753462619E-36, Group161=1.2972628010365007E-28}	{Group087=8.26083879643551E-12, Group133=6.641222531590407E-17, Group159=3.6839140179535657E-31, Group160=3.311562690470938E-34, Group161=1.945894201554751E-26}	[APOE, BCL2, CCL2, CDK4, EGFR, HMOX1, IL10, IL6, MAPK14, PPARG]	[ACOD1, ADAM15, ADM, ANGPT2, ANXA1, ANXA3, APOA1, APOA2, APOA4, APOA5, APOD, APOE, ATIC, AURKA, AXL, BAAT, BAK1, BCL2, BCL9, BIN3, BRAF, C5AR1, CAD, CAPN3, CCL2, CCNA2, CCNB1, CCND1, CDK1, CDK4, CDKN1A, CEBPB, CERS2, CFLAR, CHL1, CLDN1, CNTF, COASY, CPB2, CPQ, CSNK2A2, CSNK2B, CTNNA1, CXCL12, CXXC1, DAG1, DDX11, DFFB, DHFR, DMD, EGFR, ENO3, EPHA4, EPPK1, ERBB4, EYS, EZH2, F7, FGF10, FKBP1B, FLT3,…	TRUE
GO:0045834	GO_BiologicalProcess-GOA_23.02.2017_10h01	positive regulation of lipid metabolic process	[3, 4, 5, 6]	[Group055, Group057, Group069, Group076, Group130, Group142, Group159, Group161]	9	6.25	4.66365e-09	1.08663e-06	{Group055=1.6001975949374276E-14, Group057=4.253617063750937E-13, Group069=2.746894291012695E-12, Group076=5.586511777497201E-15, Group130=8.72359720625284E-19, Group142=7.17431876360572E-19, Group159=2.3614833448420293E-33, Group161=1.2972628010365007E-28}	{Group055=1.0081244848105795E-12, Group057=1.8715915080504124E-11, Group069=9.888819447645703E-11, Group076=3.631232655373181E-13, Group130=8.549125262127783E-17, Group142=7.174318763605721E-17, Group159=3.6839140179535657E-31, Group161=1.945894201554751E-26}	[APOE, CD81, CREB1, IFNG, IL1B, PPARG, PRKCE, PTGS2, TNF]	[AADAC, ABCD2, ABCG1, ABHD5, ABHD6, ACSL3, ADGRF5, ADIPOQ, ADRB2, AGT, AGTR1, AGXT, AKT1, AKT2, AMBRA1, ANGPTL3, ANXA1, APOA1, APOA2, APOA4, APOA5, APOC1, APOC2, APOE, ATG14, AVP, AVPR1A, BMP6, C13662, C1QTNF2, CCDC3, CCL19, CCL21, CCR7, CD81, CDC42, CNEP1R1, CPT1A, CREB1, CREBL2, CTDNEP1, CTDSP2, CYR61, DGAT2, DISP3, EEF1A2, EPHA8, ERBB4, F2, FABP1, FABP3, FAM58A, FGF1, FGF13, FGF2, FGF21, FGFR3…	TRUE
GO:0010332	GO_BiologicalProcess-GOA_23.02.2017_10h01	response to gamma radiation	[5]	[Group065, Group120, Group154, Group160]	7	11.1111	4.76334e-09	1.1051e-06	{Group065=3.2052889103204567E-20, Group120=1.0480295495135786E-20, Group154=1.203528415039811E-23, Group160=2.095925753462619E-36}	{Group065=3.6860822468685255E-18, Group120=1.2471551639211586E-18, Group154=1.6006927920029487E-21, Group160=3.311562690470938E-34}	[BAX, BCL2, BCL2L1, CCL2, CXCL10, PARP1, TP53]	[ANTXR1, APOBEC1, ATM, ATR, BAK1, BAX, BCL2, BCL2L1, BRCA2, CBL, CCL2, CDKN1A, CHEK2, CRYAB, CXCL10, CYBA, DCUN1D3, EGR1, ELK1, ERCC6, FANCD2, GATA3, GPX1, GTF2H5, H2AFX, HRAS, HSF1, KCNH4, KCNH8, KDM1A, LIG4, MDM2, MEN1, MMAB, MYC, NOX4, PARP1, PML, POLB, POLG, POLG2, PRKAA1, PRKDC, PTPRC, PVT1, RAD51, RPL26, SERPINA2, SOD2, TIGAR, TLK2, TMEM109, TP53, TP53BP1, TP63, TP73, TRIM13, TSPYL5, WRN, X…	TRUE
GO:0046890	GO_BiologicalProcess-GOA_23.02.2017_10h01	regulation of lipid biosynthetic process	[4, 5, 6]	[Group069, Group099, Group108, Group130, Group158, Group161]	9	6.2069	4.95703e-09	1.14507e-06	{Group069=2.746894291012695E-12, Group099=5.555412196230995E-16, Group108=1.0260577003899081E-11, Group130=8.72359720625284E-19, Group158=2.1814444388913482E-30, Group161=1.2972628010365007E-28}	{Group069=9.888819447645703E-11, Group099=4.055450903248627E-14, Group108=3.283384641247706E-10, Group130=8.549125262127783E-17, Group158=3.3594244358926764E-28, Group161=1.945894201554751E-26}	[APOE, CDK4, CREB1, IFNG, IL1B, NFKB1, PTGS2, SOD1, TNF]	[ABCG1, ABHD6, ACADL, ACADVL, ACSL3, ADGRF5, ADIPOQ, ADIPOR1, ADIPOR2, AKR1C3, AKT1, ANXA1, APOA1, APOA4, APOA5, APOB, APOC1, APOC2, APOC3, APOE, ATP1A1, ATP1A3, ATP1A4, AVP, AVPR1A, BMP2, BMP5, BMP6, BRCA1, C13662, C3, CCDC3, CDK4, CEACAM1, CNEP1R1, CREB1, CREBL2, CTDNEP1, CYP27B1, CYP7A1, CYR61, DDX20, DGAT2, DGKQ, DHCR7, DHH, DKK3, EGR1, EIF6, ERLIN1, ERLIN2, FABP3, FAM58A, FBXW7, FGF1, FGF19,…	TRUE
GO:0097305	GO_BiologicalProcess-GOA_23.02.2017_10h01	response to alcohol	[4]	[Group004]	10	4.92611	6.12025e-09	1.40766e-06	{Group004=6.120245114204821E-9}	{Group004=7.956318648466268E-8}	[BCL2L1, CASP8, CAT, CCL2, G6PD, ICAM1, IL2, IL4, PRKCE, SOD1]	[AACS, ABAT, ABCA1, ACTC1, ACTR2, ADCY7, ADCYAP1, ADCYAP1R1, ADH6, ADH7, ADIPOQ, ALAD, APOBEC1, ARSA, AVP, BAD, BAK1, BCL2L1, BGLAP, BIRC2, BLM, BRCA1, C03958, C13662, C16051, C16079, C18201, C19897, CA3, CASP8, CAT, CBL, CCL2, CCL3, CCND1, CCR5, CD14, CD27, CDH1, CDK1, CDO1, CHRNB2, CLDN1, CLDN18, CLDN3, CLDN5, CLDN7, CNR1, CRAT, CRH, CRHBP, CSF3, CTNNA1, CTNNB1, CYBB, CYP2E1, CYP7A1, DAG1, DBH,…	TRUE
GO:0007584	GO_BiologicalProcess-GOA_23.02.2017_10h01	response to nutrient	[3, 5]	[Group028, Group067, Group083, Group155]	10	4.87805	6.72453e-09	1.53992e-06	{Group028=2.469054413533442E-14, Group067=3.8968317253609067E-17, Group083=9.283507481187041E-23, Group155=1.5800558011000385E-30}	{Group028=1.5308137363907342E-12, Group067=3.3123069665567706E-15, Group083=1.1882889575919413E-20, Group155=2.4490864917050597E-28}	[CAT, CCL2, CD4, CXCL10, EGFR, HMOX1, IL4, PPARG, PTGS2, RELA]	[AACS, ABCA1, ABCB4, ABCG5, ABCG8, ACSL1, ACSL3, ACSL4, ADA, ADIPOQ, ADIPOR2, ADSL, AGL, AHCY, AKR1C3, ALAD, ALDH1A2, ALDH3A1, ALPL, APAF1, APOA1, AQP3, ARG1, ARID4A, ARSA, ARSB, ASCL1, ATP2B1, BCHE, BECN1, BGLAP, BMP7, BRIP1, BTF3P11, C13055, C16051, C18200, C18201, C2, CASR, CAT, CCKAR, CCL2, CCL28, CCND1, CD3E, CD4, CD40, CDKN2B, CDKN2D, CHMP1A, CNR1, COL1A1, COX4I1, CRAT, CXCL10, CXXC1, CYBB,…	TRUE
GO:0048872	GO_BiologicalProcess-GOA_23.02.2017_10h01	homeostasis of number of cells	[4]	[Group043, Group092, Group104, Group131, Group160, Group161]	11	4.07407	7.28654e-09	1.66133e-06	{Group043=7.255481590296722E-10, Group092=5.2205935367859703E-23, Group104=5.90642690918055E-14, Group131=8.965170180080678E-17, Group160=2.095925753462619E-36, Group161=1.2972628010365007E-28}	{Group043=1.1608770544474755E-8, Group092=6.786771597821762E-21, Group104=3.2485348000493025E-12, Group131=7.351439547666156E-15, Group160=3.311562690470938E-34, Group161=1.945894201554751E-26}	[BAX, BCL2, CASP3, G6PD, HMOX1, IFNG, IL2, IL6, MAPK14, RB1, SOD1]	[ABL1, ACIN1, ACVR1B, ACVR2A, ADA, ADAM17, ADAR, ADD1, AFDN, AHSP, AKT1, AKT3, ALAS2, AMH, AMPD3, ANKRD54, ANXA1, ARID4A, ARNT, ASXL1, ATPIF1, AXL, B2M, BAK1, BAP1, BAX, BCL10, BCL2, BCL2L11, BCL6, BCR, BMP4, C16051, C18200, C19313, CACNA1F, CARD11, CASP3, CCNB2, CCR4, CCR7, CD7, CD74, CDH2, CDK6, CEBPG, CEL, CFH, CLSTN1, CNOT6, CORO1A, CSF1, CYLD, DMTN, DNAJA3, DNASE2, DOCK10, DOCK11, DYRK3, EMX…	TRUE
GO:0060558	GO_BiologicalProcess-GOA_23.02.2017_10h01	regulation of calcidiol 1-monooxygenase activity	[5, 6, 7, 8, 9]	[Group102, Group105, Group130, Group139, Group141, Group148, Group153, Group161]	4	57.1429	7.44071e-09	1.68904e-06	{Group102=5.266614387496279E-16, Group105=7.609187719694851E-20, Group130=8.72359720625284E-19, Group139=2.373309952007317E-19, Group141=5.055409846520685E-27, Group148=7.862789791132838E-14, Group153=9.632572699614655E-25, Group161=1.2972628010365007E-28}	{Group102=3.897294646747246E-14, Group105=8.370106491664335E-18, Group130=8.549125262127783E-17, Group139=2.5157085491277562E-17, Group141=7.330344277454994E-25, Group148=4.2459064872117324E-12, Group153=1.3196624598472077E-22, Group161=1.945894201554751E-26}	[IFNG, IL1B, NFKB1, TNF]	[CYP27B1, GFI1, IFNG, IL1B, NFKB1, TNF, VDR]	TRUE
GO:0050729	GO_BiologicalProcess-GOA_23.02.2017_10h01	positive regulation of inflammatory response	[4, 5, 6, 7]	[Group056, Group118, Group123, Group140, Group152, Group156, Group157, Group158, Group161]	8	7.47664	8.6342e-09	1.95133e-06	{Group056=8.114071639618488E-17, Group118=4.905106245059882E-26, Group123=1.2336345804534712E-34, Group140=1.0731331045036508E-17, Group152=3.9478872628846304E-24, Group156=2.39789469623427E-30, Group157=6.014358351570216E-37, Group158=2.1814444388913482E-30, Group161=1.2972628010365007E-28}	{Group056=6.734679460883345E-15, Group118=6.916199805534434E-24, Group123=1.9368062913119498E-32, Group140=9.872824561433587E-16, Group152=5.329647804894251E-22, Group156=3.668778885238433E-28, Group157=9.562829778996643E-35, Group158=3.3594244358926764E-28, Group161=1.945894201554751E-26}	[EGFR, IL1B, IL2, IL6, PIK3CG, PTGS2, SERPINE1, TNF]	[ADAM8, ADORA2B, AGT, AGTR1, AGXT, ALOX5AP, BTK, C3, CCL24, CCL3, CCM2, CCR2, CCR7, CD28, CD47, CD6, CDK19, CLOCK, CNR1, CREB3L3, CX3CL1, EGFR, EHHADH, ETS1, F12, FABP4, FCER1A, FCER1G, FFAR2, FFAR3, GBP5, GPRC5B, GPSM3, HSPD1, HYAL2, IDO1, IL12B, IL15, IL17A, IL17B, IL17F, IL17RA, IL17RB, IL17RC, IL18, IL1B, IL1RL1, IL2, IL21, IL23A, IL33, IL6, IL6ST, ITGA2, JAK2, KARS, KLKB1, LBP, LCP1, LDLR, L…	TRUE
GO:0090257	GO_BiologicalProcess-GOA_23.02.2017_10h01	regulation of muscle system process	[4, 5]	[Group021, Group046, Group071]	10	4.65116	1.06122e-08	2.37713e-06	{Group021=1.1086437902368568E-10, Group046=1.7206874458711569E-15, Group071=2.8660833297684307E-15}	{Group021=2.660745096568456E-9, Group046=1.2044812121098097E-13, Group071=1.9202758309448486E-13}	[ACE2, CALM1, G6PD, NOS3, PARP1, PIK3CG, PRKCA, PTGS2, SMAD3, SOD1]	[ABAT, ACE2, ACTN3, ADA, ADORA1, ADORA2B, ADRA1A, ADRA1B, ADRA1D, ADRA2A, ADRA2B, ADRA2C, ADRB2, AGT, AGXT, AIF1, AKAP13, AKAP6, AKAP9, ANK2, ANXA6, ARHGAP42, ASPH, ATP1A1, ATP1A2, ATP1A3, ATP1A4, ATP1B1, ATP2A1, ATP2A2, ATP2B4, BMP10, C00746, C15869, CACNA1C, CALCA, CALCRL, CALM1, CAMK2B, CAMK2D, CAMK2G, CASQ1, CASQ2, CAV1, CAV3, CDK9, CHGA, CHRM1, CHRM2, CHRM3, CHRNA3, CHRNB4, CLIC2, CNN1, CTDP…	TRUE
GO:0050728	GO_BiologicalProcess-GOA_23.02.2017_10h01	negative regulation of inflammatory response	[4, 5, 6, 7]	[Group115, Group123, Group125, Group138, Group153, Group161]	8	7.01754	1.42673e-08	3.11026e-06	{Group115=5.1646959803579173E-14, Group123=1.2336345804534712E-34, Group125=7.480942316253816E-16, Group138=2.2350029818032858E-20, Group153=9.632572699614655E-25, Group161=1.2972628010365007E-28}	{Group115=2.995523668607592E-12, Group123=1.9368062913119498E-32, Group125=5.311469044540209E-14, Group138=2.6149534887098442E-18, Group153=1.3196624598472077E-22, Group161=1.945894201554751E-26}	[APOE, IL10, IL2, IL4, IL6, NFKB1, PPARG, SMAD3]	[ABR, ACOD1, ADA, ADCYAP1, ADIPOQ, ADORA1, ADORA2A, AGER, AOAH, APCS, APOA1, APOD, APOE, ASH1L, BCR, C1QTNF12, C1QTNF3, C5orf30, CALCRL, CHID1, CNR2, CUEDC2, CX3CR1, CXCL17, CYP19A1, DEAF1, DUSP10, ELANE, ETS1, FEM1A, FEM1C, FFAR4, FOXF1, FOXP3, GATA3, GBA, GHRL, GHSR, GPER1, GPR17, GPX1, GSTP1, HGF, HLA-DRB1, IL10, IL12B, IL1R2, IL2, IL20RB, IL22RA2, IL2RA, IL4, IL6, INS, ISL1, KLF4, KRT1, LOC10…	TRUE
GO:0051043	GO_BiologicalProcess-GOA_23.02.2017_10h01	regulation of membrane protein ectodomain proteolysis	[5, 6, 7, 8]	[Group011, Group093, Group114, Group130, Group148, Group151, Group161]	5	21.7391	2.51791e-08	5.36314e-06	{Group011=3.252980946800273E-10, Group093=6.491736171405106E-16, Group114=2.1225869765692824E-15, Group130=8.72359720625284E-19, Group148=7.862789791132838E-14, Group151=5.6806760749081155E-21, Group161=1.2972628010365007E-28}	{Group011=6.180663798920519E-9, Group093=4.674050043411676E-14, Group114=1.4645850138328048E-13, Group130=8.549125262127783E-17, Group148=4.2459064872117324E-12, Group151=6.930424811387901E-19, Group161=1.945894201554751E-26}	[APOE, IFNG, IL10, IL1B, TNF]	[ADAM8, ADAM9, ADRA2A, APOE, FURIN, GPLD1, IFNG, IL10, IL1B, LRIG2, NRDC, PACSIN3, PTPN3, RGMA, SH3D19, SNX33, SNX9, TIMP1, TIMP2, TIMP3, TIMP4, TNF, TNFRSF1B]	TRUE
GO:0048661	GO_BiologicalProcess-GOA_23.02.2017_10h01	positive regulation of smooth muscle cell proliferation	[4, 5, 6]	[Group049, Group067, Group072, Group093, Group110, Group112, Group145, Group156, Group158, Group159, Group161]	7	8.75	2.59554e-08	5.50255e-06	{Group049=5.259467498051892E-14, Group067=3.8968317253609067E-17, Group072=3.6656708819119506E-14, Group093=6.491736171405106E-16, Group110=1.095475490592073E-21, Group112=2.0443419021937814E-23, Group145=8.291268333444812E-26, Group156=2.39789469623427E-30, Group158=2.1814444388913482E-30, Group159=2.3614833448420293E-33, Group161=1.2972628010365007E-28}	{Group049=2.9978964738895782E-12, Group067=3.3123069665567706E-15, Group072=2.162745820328051E-12, Group093=4.674050043411676E-14, Group110=1.3583896083341706E-19, Group112=2.6780878918738537E-21, Group145=1.1607775666822736E-23, Group156=3.668778885238433E-28, Group158=3.3594244358926764E-28, Group159=3.6839140179535657E-31, Group161=1.945894201554751E-26}	[EGFR, HMOX1, IL10, IL6, PTGS2, STAT1, TNF]	[ABCC4, AGT, AGXT, AIF1, AKR1B1, AKT1, ALOX12, BMP4, BMPR1A, CALCRL, CAMK2D, CCL5, CDH13, CYBA, DDX39B, EDN1, EGFR, ELANE, EREG, ERN1, FGFR2, FOXP1, HBEGF, HDAC4, HES5, HMGCR, HMOX1, HPGD, HTR1B, ID2, IGF1, IL10, IL13, IL18, IL6, IL6R, IRAK1, IRAK4, ITGA2, JAK2, JUN, MAP3K5, MDM2, MMP2, MMP9, MNAT1, MTOR, MYB, MYC, MYD88, NAMPT, NOTCH3, NOX1, NPY5R, NQO2, NR4A3, PAK1, PDGFB, PDGFD, PDGFRB, PKN1, …	TRUE
GO:0071677	GO_BiologicalProcess-GOA_23.02.2017_10h01	positive regulation of mononuclear cell migration	[4, 5, 6, 7, 8, 9]	[Group074, Group079, Group094, Group150, Group154, Group157, Group161]	5	20.8333	3.17091e-08	6.59549e-06	{Group074=6.309205599136187E-19, Group079=8.893212916361293E-15, Group094=1.4395324297023587E-22, Group150=6.47380039518465E-25, Group154=1.203528415039811E-23, Group157=6.014358351570216E-37, Group161=1.2972628010365007E-28}	{Group074=6.435389711118911E-17, Group079=5.691656266471228E-13, Group094=1.813810861424972E-20, Group150=8.998582549306663E-23, Group154=1.6006927920029487E-21, Group157=9.562829778996643E-35, Group161=1.945894201554751E-26}	[CCL2, CXCL10, IL4, SERPINE1, TNF]	[AIF1, ANO6, CCL1, CCL2, CCL5, CCR1, CCR2, CREB3, CREB3L4, CXCL10, CXCL12, CXCL17, HMGB1, IL4, LGALS3, PDGFD, PLA2G7, S100A11P1, S100A14, S100A7, SERPINE1, TGFB1, TNF, TNFSF18]	TRUE
GO:0001935	GO_BiologicalProcess-GOA_23.02.2017_10h01	endothelial cell proliferation	[4]	[Group042, Group049, Group063, Group093, Group114, Group161]	8	6.29921	3.33842e-08	6.91052e-06	{Group042=3.087487453903566E-14, Group049=5.259467498051892E-14, Group063=1.691568844596322E-11, Group093=6.491736171405106E-16, Group114=2.1225869765692824E-15, Group161=1.2972628010365007E-28}	{Group042=1.8833673468811752E-12, Group049=2.9978964738895782E-12, Group063=4.398078995950437E-10, Group093=4.674050043411676E-14, Group114=1.4645850138328048E-13, Group161=1.945894201554751E-26}	[APOE, CCL2, CCR3, HMOX1, IL10, PRKCA, STAT1, TNF]	[ACVRL1, AGGF1, AIMP1, AKT1, ALDH1A2, ANG, APOA1, APOE, APOH, ARG1, ARNT, ATOH8, ATP5A1, ATPIF1, BMP2, BMP4, BMP6, BMPER, BMPR2, CALCA, CAV1, CAV2, CCL11, CCL2, CCL24, CCL26, CCR3, CD34, CDH13, CNTN1, CXCL12, CXCR3, CYBA, DLG1, DLL4, ECM1, EGFL7, EGR3, ENG, EPHA2, ERN1, F3, FGF13, FGF2, FLT4, GDF2, GHRL, GJA1, HIF1A, HMGB2, HMOX1, HTR2B, IL10, ITGB1BP1, ITGB3, JUN, KDR, KRIT1, LEP, LOXL2, LRG1, M…	TRUE
GO:1903169	GO_BiologicalProcess-GOA_23.02.2017_10h01	regulation of calcium ion transmembrane transport	[7, 8, 9, 10]	[Group071, Group075, Group154]	8	6.06061	4.51635e-08	9.21335e-06	{Group071=2.8660833297684307E-15, Group075=2.6908036920448136E-16, Group154=1.203528415039811E-23}	{Group071=1.9202758309448486E-13, Group075=2.0719188428745066E-14, Group154=1.6006927920029487E-21}	[BAX, CALM1, CXCL10, CXCL11, G6PD, PIK3CG, PRKCA, PRKCE]	[ABL1, ADRA2A, AHNAK, AKAP6, ANK2, APEX1, APP, ASPH, ATG5, ATP1A2, ATP1B1, BAX, BDKRB1, CACNA1C, CACNA2D1, CACNB1, CACNB2, CACNB3, CACNB4, CALM1, CAMK2D, CAPN3, CASQ1, CASQ2, CAV3, CBARP, CD19, CEMIP, CHD7, CLIC2, CORO1A, CRACR2A, CRHR1, CXCL10, CXCL11, CXCL9, CXCR3, CYBA, DHRS7C, DIAPH1, DMD, DRD1, DRD2, DRD4, EHD3, F2, F2R, F2RL3, FGF14, FKBP1A, FKBP1B, FMR1, FMR1-IT1, FYN, G6PD, GNB5, GPER1, G…	TRUE
GO:0031100	GO_BiologicalProcess-GOA_23.02.2017_10h01	animal organ regeneration	[4, 5, 6]	[Group067, Group087, Group089, Group144, Group145, Group151, Group159, Group161]	7	7.86517	5.47589e-08	1.10065e-05	{Group067=3.8968317253609067E-17, Group087=1.685885468660308E-13, Group089=2.0657438308566865E-17, Group144=3.030093432374026E-28, Group145=8.291268333444812E-26, Group151=5.6806760749081155E-21, Group159=2.3614833448420293E-33, Group161=1.2972628010365007E-28}	{Group067=3.3123069665567706E-15, Group087=8.26083879643551E-12, Group089=1.838512009462451E-15, Group144=4.484538279913559E-26, Group145=1.1607775666822736E-23, Group151=6.930424811387901E-19, Group159=3.6839140179535657E-31, Group161=1.945894201554751E-26}	[CCL2, CDK4, EGFR, HMOX1, IL10, IL6, PPARG]	[ACOD1, ADM, ANGPT2, ANXA3, APOA1, APOA2, ATIC, AURKA, AXL, BAAT, BAK1, C5AR1, CAD, CCL2, CCNA2, CCND1, CDK1, CDK4, CDKN1A, CEBPB, CLDN1, COASY, CPB2, CSNK2A2, CSNK2B, CXCL12, DFFB, EGFR, EZH2, F7, FLT3, FPGS, GAS6, GLI1, GSTP1, HAMP, HFE, HGF, HMOX1, IGF2R, IL10, IL6, LCP1, LPAL2, LPIN1, MBD4, MED1, MKI67, MYC, NFKBIA, NNMT, NOTCH1, NR0B2, NR4A3, PCNA, PDHX, PDX1, PFKFB1, PGF, PNPT1, PPARG, PPAT…	TRUE
GO:0070542	GO_BiologicalProcess-GOA_23.02.2017_10h01	response to fatty acid	[4, 5]	[Group055, Group057, Group083, Group159, Group161]	7	7.86517	5.47589e-08	1.10065e-05	{Group055=1.6001975949374276E-14, Group057=4.253617063750937E-13, Group083=9.283507481187041E-23, Group159=2.3614833448420293E-33, Group161=1.2972628010365007E-28}	{Group055=1.0081244848105795E-12, Group057=1.8715915080504124E-11, Group083=1.1882889575919413E-20, Group159=3.6839140179535657E-31, Group161=1.945894201554751E-26}	[CAT, CCL2, CDK4, CREB1, PPARG, PRKCE, PTGS2]	[AACS, AANAT, ACACA, ACSL1, ADCY6, ADIPOQ, AKAP8, AKR1C2, AKR1C3, AKT1, ALAD, APOB, BAD, C00746, CAT, CCL19, CCL2, CCL21, CCNB1, CCR7, CD36, CDK4, CLDN1, CPS1, CPT1A, CRAT, CREB1, CTGF, CYP21A2, DGAT2, E2F1, EDN1, FABP3, FFAR1, FFAR2, FFAR3, GIPR, GLYAT, GNAS, GNB1, GNG2, GNPAT, GNRH1, HMGCL, ID3, INSIG2, KCNK4, LDLR, NFATC4, NME2, NR1H4, OR51E2, OXT, P2RY4, P2RY6, PDHX, PDK3, PDK4, PDX1, PID1, P…	TRUE
GO:0009409	GO_BiologicalProcess-GOA_23.02.2017_10h01	response to cold	[3, 4]	[Group028, Group048, Group081, Group097, Group113, Group142, Group159, Group161]	6	11.3208	5.69689e-08	1.13938e-05	{Group028=2.469054413533442E-14, Group048=2.4289727240682905E-19, Group081=2.3550023519198475E-19, Group097=5.641539777391449E-38, Group113=4.548470078238836E-20, Group142=7.17431876360572E-19, Group159=2.3614833448420293E-33, Group161=1.2972628010365007E-28}	{Group028=1.5308137363907342E-12, Group048=2.550421360271705E-17, Group081=2.5198525165542367E-17, Group097=9.026463643826318E-36, Group113=5.094286487627496E-18, Group142=7.174318763605721E-17, Group159=3.6839140179535657E-31, Group161=1.945894201554751E-26}	[CASP8, CXCL10, FOS, IL6, PPARG, PTGS2]	[ACADM, ACADVL, ACOT11, ADM, ADRB1, ADRB2, ADRB3, ATP2B1, C03958, CASP8, CDH8, CIRBP, COX2, CXCL10, DNAJC3, EIF2AK3, EIF2AK4, FOS, FOXO1, GMPR, HSP90AA1, HSPA2, HSPD1, IL6, LCP1, LGALS13, LPL, LRP11, METRNL, NFKBIA, P2RX3, PCSK1N, PLAC8, PPARG, PPARGC1A, PRKAA1, PTGS2, RNF34, SAXO1, SLC25A27, SLC27A1, SOD2, THRA, TMEM135, TRH, TRPA1, TRPM8, UCP1, UCP2, UCP3, VGF, YBX3, ZNF516]	TRUE
GO:0051205	GO_BiologicalProcess-GOA_23.02.2017_10h01	protein insertion into membrane	[4, 5, 6, 7]	[Group023, Group034, Group085, Group096, Group109, Group117, Group160, Group161]	6	11.3208	5.69689e-08	1.13938e-05	{Group023=1.3370853332271275E-11, Group034=1.4198320846036622E-18, Group085=2.6500112563124555E-15, Group096=5.896738035562535E-21, Group109=9.5049965209969E-19, Group117=9.856959170040014E-12, Group160=2.095925753462619E-36, Group161=1.2972628010365007E-28}	{Group023=3.87754746635867E-10, Group034=1.3630388012195157E-16, Group085=1.8020076542924697E-13, Group096=7.135053023030667E-19, Group109=9.219846625366993E-17, Group117=3.2527965261132046E-10, Group160=3.311562690470938E-34, Group161=1.945894201554751E-26}	[BAX, BCL2, CASP8, EGFR, MAPK8, TP53]	[ASNA1, BAD, BAG6, BAX, BBC3, BCL2, BCL2L11, BID, BMF, CASP8, COX18, DYNLL1, DYNLL2, E2F1, EGFR, ERGIC3, GET4, GRIN3B, GZMB, MAIP1, MAPK8, MOAP1, NMT1, OXA1L, PMAIP1, PPP1R13B, PPP3CC, PPP3R1, REEP1, REXO2, RTP1, RTP2, RTP3, RTP4, RTP5, SFN, SH3GLB1, TFDP1, TFDP2, TP53, TP53BP1, TP53BP2, TP63, TP73, TRAM2, UBL4A, WRB, YWHAB, YWHAE, YWHAG, YWHAH, YWHAQ, YWHAZ]	TRUE
GO:2001235	GO_BiologicalProcess-GOA_23.02.2017_10h01	positive regulation of apoptotic signaling pathway	[4, 5, 6, 7, 8]	[Group050, Group109, Group117, Group160]	9	4.66321	5.97942e-08	1.1899e-05	{Group050=8.317822597433291E-20, Group109=9.5049965209969E-19, Group117=9.856959170040014E-12, Group160=2.095925753462619E-36}	{Group050=9.066426631202287E-18, Group109=9.219846625366993E-17, Group117=3.2527965261132046E-10, Group160=3.311562690470938E-34}	[BAX, BCL2, BCL2L1, CASP8, MAPK8, MCL1, SMAD3, SOD1, TP53]	[ADORA2A, AGT, AGTR2, AGXT, APAF1, APOPT1, ATF3, ATPIF1, BAD, BAK1, BAX, BBC3, BCAP31, BCL10, BCL2, BCL2L1, BCL2L11, BCL2L14, BCLAF1, BID, BIK, BMF, BMPR1B, BNIP3, BOK, CASP2, CASP8, CAV1, CCM2, CD8A, CIDEB, CLU, CRADD, CTNNA1, CTSC, CTSH, CYLD, DAB2IP, DAPK3, DDIT3, DEDD2, DFNA5, DNM1L, DYNLL1, DYNLL2, E2F1, EEF1E1-BLOC1S5, FADD, FAF1, FAM162A, FAS, FASLG, FASN, FBXO18, FBXW7, FIS1, G0S2, GPER1,…	TRUE
GO:0050806	GO_BiologicalProcess-GOA_23.02.2017_10h01	positive regulation of synaptic transmission	[3, 4, 5, 6, 8, 9]	[Group014, Group030, Group057, Group071, Group159, Group161]	8	5.6338	7.97739e-08	1.54761e-05	{Group014=3.115639175355854E-10, Group030=6.554902454475491E-13, Group057=4.253617063750937E-13, Group071=2.8660833297684307E-15, Group159=2.3614833448420293E-33, Group161=1.2972628010365007E-28}	{Group014=6.231278350711708E-9, Group030=2.7530590308797062E-11, Group057=1.8715915080504124E-11, Group071=1.9202758309448486E-13, Group159=3.6839140179535657E-31, Group161=1.945894201554751E-26}	[APOE, CCL2, CREB1, EGFR, IFNG, MAPK1, PRKCE, PTGS2]	[ABAT, ADCYAP1, ADORA1, ADORA2A, ADRA1A, ADRA1D, APEX1, APOE, ARC, ARRB2, BAIAP2, BRAF, C00746, C15869, C15906, C16079, C1QTNF1, CA2, CA7, CALB1, CCL2, CHRFAM7A, CHRNA7, CHRNB2, CLSTN1, CLSTN2, CLSTN3, CREB1, CRH, CRTC1, CUX2, CX3CR1, DLG4, DNM1L, DRD1, DRD2, DRD4, DTNBP1, DVL1, DVL1P1, EGFR, EIF2AK4, FLOT1, FMR1, FMR1-IT1, FOXM1, GIP, GLUL, GNAI2, GPER1, GPRIN1, GRIK2, GRIK5, GRIN1, GRIN2A, HAP1…	TRUE
GO:1901215	GO_BiologicalProcess-GOA_23.02.2017_10h01	negative regulation of neuron death	[4, 5, 6]	[Group087, Group090, Group092, Group131, Group133, Group160]	9	4.5	8.11875e-08	1.56692e-05	{Group087=1.685885468660308E-13, Group090=1.5479791277768595E-23, Group092=5.2205935367859703E-23, Group131=8.965170180080678E-17, Group133=6.575467853059808E-19, Group160=2.095925753462619E-36}	{Group087=8.26083879643551E-12, Group090=2.0433324486654544E-21, Group092=6.786771597821762E-21, Group131=7.351439547666156E-15, Group133=6.641222531590407E-17, Group160=3.311562690470938E-34}	[APOE, BAX, BCL2, BCL2L1, CCL2, CREB1, HMOX1, IL6, SOD1]	[AARS, ADAM8, ADNP, ADORA2A, AGAP2, AKT1, ALKBH1, AMBRA1, ANGPT1, APOE, ATF4, ATG7, ATP13A2, AXL, BARHL1, BAX, BCL2, BCL2L1, BDNF, BDNF-AS, BHLHB9, BIRC5, BOK, BRAF, BTBD10, BTG2, C18200, C1D, C5AR1, CACNA1A, CBL, CCL2, CD34, CDK5, CEBPB, CHGA, CHL1, CHMP4A, CHMP4B, CITED1, CLCF1, CLN3, CNTF, CNTFR, CORO1A, CPEB4, CREB1, CRLF1, CSF3, CTNNB1, DDX11, DLX1, DNAJC5, DRAXIN, EIF4G1, EN1, EN2, EPO, EPX…	TRUE
GO:0050810	GO_BiologicalProcess-GOA_23.02.2017_10h01	regulation of steroid biosynthetic process	[5, 6, 7]	[Group069, Group102, Group108, Group114, Group125, Group139, Group158, Group161]	6	10.3448	9.89134e-08	1.87935e-05	{Group069=2.746894291012695E-12, Group102=5.266614387496279E-16, Group108=1.0260577003899081E-11, Group114=2.1225869765692824E-15, Group125=7.480942316253816E-16, Group139=2.373309952007317E-19, Group158=2.1814444388913482E-30, Group161=1.2972628010365007E-28}	{Group069=9.888819447645703E-11, Group102=3.897294646747246E-14, Group108=3.283384641247706E-10, Group114=1.4645850138328048E-13, Group125=5.311469044540209E-14, Group139=2.5157085491277562E-17, Group158=3.3594244358926764E-28, Group161=1.945894201554751E-26}	[APOE, IFNG, IL1B, NFKB1, SOD1, TNF]	[ABCG1, AKR1C3, APOB, APOE, ATP1A1, ATP1A3, ATP1A4, BMP2, BMP5, BMP6, CYP27B1, CYP7A1, DDX20, DGKQ, DHCR7, DHH, DKK3, EGR1, ERLIN1, ERLIN2, FAM58A, FGF1, FGF19, FGFR4, GFI1, GUCY2C, IFNG, IGFBP7, IL1B, INSIG1, INSIG2, LEP, MALRD1, NFKB1, NR1D1, NR1H4, NR5A1, POR, PPARGC1A, PRKAA1, PROX1, REST, SCAP, SEC14L2, SF1, SH2D2A, SIRT1, SNAI1, SNAI2, SOD1, SREBF1, STAR, STARD4, TNF, TSPO, VDAC2, VDR, WNT4]	TRUE
GO:0032770	GO_BiologicalProcess-GOA_23.02.2017_10h01	positive regulation of monooxygenase activity	[4, 5, 6]	[Group008, Group114, Group130, Group146, Group161]	5	16.6667	1.04401e-07	1.97319e-05	{Group008=1.873217718010227E-8, Group114=2.1225869765692824E-15, Group130=8.72359720625284E-19, Group146=5.380402153400938E-28, Group161=1.2972628010365007E-28}	{Group008=1.3112524026071587E-7, Group114=1.4645850138328048E-13, Group130=8.549125262127783E-17, Group146=7.909191165499379E-26, Group161=1.945894201554751E-26}	[APOE, CALM1, IFNG, IL1B, TNF]	[AGTR2, AKT1, APOE, CALM1, CDH15, CDH3, DHFR, ESR1, FCER2, GCH1, GDNF, HIF1A, HTR2B, IFNG, IL1B, INS, KRAS, NOD1, NOS1AP, NPR3, NPRL3, PARK7, POR, PTK2B, RNU1-93P, SCARB1, TERF2, TERT, TNF, VDAC2]	TRUE
GO:0043500	GO_BiologicalProcess-GOA_23.02.2017_10h01	muscle adaptation	[2, 4]	[Group021, Group039, Group046]	7	7.14286	1.06942e-07	2.01051e-05	{Group021=1.1086437902368568E-10, Group039=4.678066514792462E-16, Group046=1.7206874458711569E-15}	{Group021=2.660745096568456E-9, Group039=3.5553305512422715E-14, Group046=1.2044812121098097E-13}	[G6PD, HMOX1, IL1B, NOS3, PARP1, PRKCA, SMAD3]	[ACTA1, ACTN3, AGT, AGXT, AIF1, AKAP13, AKAP6, ATP2A2, ATP2B4, BMP10, CAMK2B, CAMK2D, CAMK2G, CAMTA2, CASQ1, CAV3, CDK9, CFLAR, CTDP1, CYBA, DAG1, DDX39B, DMD, EDN1, ERRFI1, EZH2, FBXO32, G6PD, GATA6, GATM, GLRX3, GSK3A, GSK3B, GSN, GTF2I, GTF2IRD1, HAMP, HAND2, HDAC4, HEY2, HMOX1, IGF1, IGFBP5, IL15, IL1B, IL6ST, INPP5F, JARID2, KDM4A, KLF15, KLF4, LMCD1, MEF2A, MEF2C, MSTN, MTMR4, MTOR, MTPN, M…	TRUE
GO:0098869	GO_BiologicalProcess-GOA_23.02.2017_10h01	cellular oxidant detoxification	[3, 6]	[Group037, Group088, Group158, Group161]	7	7	1.22982e-07	2.28746e-05	{Group037=6.61054049147753E-17, Group088=8.18427208747288E-14, Group158=2.1814444388913482E-30, Group161=1.2972628010365007E-28}	{Group037=5.5528540128411255E-15, Group088=4.337664206360627E-12, Group158=3.3594244358926764E-28, Group161=1.945894201554751E-26}	[APOE, CAT, NOS3, PTGS1, PTGS2, SOD1, TNF]	[AAED1, ALB, APOA4, APOE, APOM, ATP7A, BMP7, CAT, CCS, CD36, CLIC2, CRAT, CYGB, DEFB132, DHFR, DLC1, DUOX1, DUOX2, EPX, FABP1, FAM213A, FAM213B, FBLN5, GCH1, GLYAT, GPX1, GPX2, GPX3, GPX4, GPX5, GPX6, GPX7, GPX8, GSR, GSTA1, GSTK1, GSTM2, GSTO1, GSTO2, GSTP1, GSTT1, GSTZ1, HBA1, HBB, HP, HPR, IPCEF1, IYD, KDM3B, KRT89P, LPO, LTC4S, MGST1, MGST2, MGST3, MPO, MT3, NANOS3, NFE2L2, NOS3, NQO1, NXN, N…	TRUE
GO:0002675	GO_BiologicalProcess-GOA_23.02.2017_10h01	positive regulation of acute inflammatory response	[5, 6, 7, 8]	[Group099, Group113, Group118, Group142, Group152, Group153, Group156, Group161]	5	16.129	1.24103e-07	2.2959e-05	{Group099=5.555412196230995E-16, Group113=4.548470078238836E-20, Group118=4.905106245059882E-26, Group142=7.17431876360572E-19, Group152=3.9478872628846304E-24, Group153=9.632572699614655E-25, Group156=2.39789469623427E-30, Group161=1.2972628010365007E-28}	{Group099=4.055450903248627E-14, Group113=5.094286487627496E-18, Group118=6.916199805534434E-24, Group142=7.174318763605721E-17, Group152=5.329647804894251E-22, Group153=1.3196624598472077E-22, Group156=3.668778885238433E-28, Group161=1.945894201554751E-26}	[IL1B, IL6, PIK3CG, PTGS2, TNF]	[ADAM8, ALOX5AP, BTK, C3, CCM2, CCR7, CNR1, CREB3L3, F12, FCER1A, FCER1G, FFAR2, FFAR3, IL1B, IL6, IL6ST, KLKB1, NPY5R, OSM, OSMR, PARK7, PCDHA4, PCDHA@, PIK3CG, PTGER3, PTGS2, TAC1, TNF, TNFRSF11A, TNFSF11, ZP3]	TRUE
GO:0030888	GO_BiologicalProcess-GOA_23.02.2017_10h01	regulation of B cell proliferation	[6, 7, 8]	[Group134, Group136, Group137, Group161]	6	9.83606	1.34452e-07	2.47391e-05	{Group134=5.416335777720201E-14, Group136=1.8509521382527809E-22, Group137=1.0770586316843705E-11, Group161=1.2972628010365007E-28}	{Group134=3.0331480355233125E-12, Group136=2.313690172815976E-20, Group137=3.231175895053112E-10, Group161=1.945894201554751E-26}	[BCL2, CASP3, CD81, IL10, IL2, IL4]	[ADA, AHR, AMH, ATAD5, ATM, BCL2, BCL6, BTK, CARD11, CASP3, CD300A, CD38, CD40, CD74, CD81, CDKN1A, CDKN2A, CHRNB2, CLCF1, CTLA4, GPR183, IKZF3, IL10, IL13, IL2, IL21, IL4, IL5, IL7, INPP5D, IRS2, LYN, MEF2C, MIF, MNDA, MZB1, NCKAP1L, NFATC2, PAWR, PELI1, PKN1, PRDM1, PTPRC, RC3H1, S100A8, S100A9, SASH3, SLC39A10, TCF3, TCF7L1, TFRC, TICAM1, TIRAP, TLR4, TNFRSF13B, TNFRSF13C, TNFRSF21, TNFRSF4, T…	TRUE
GO:1990266	GO_BiologicalProcess-GOA_23.02.2017_10h01	neutrophil migration	[5, 7, 8, 9]	[Group080, Group127, Group152, Group157]	7	6.73077	1.6121e-07	2.93401e-05	{Group080=2.1232905665321592E-17, Group127=9.796760338000124E-17, Group152=3.9478872628846304E-24, Group157=6.014358351570216E-37}	{Group080=1.8684956985483E-15, Group127=7.9353758737801E-15, Group152=5.329647804894251E-22, Group157=9.562829778996643E-35}	[CCL2, CXCL2, CXCL8, IFNG, IL1A, IL1B, PIK3CG]	[ADAM8, BST1, C1QBP, C3AR1, C5AR1, C5AR2, CAMK1D, CCL1, CCL11, CCL13, CCL14, CCL15, CCL15-CCL14, CCL16, CCL17, CCL18, CCL19, CCL2, CCL20, CCL21, CCL22, CCL23, CCL24, CCL25, CCL26, CCL3, CCL3L1, CCL4, CCL4L1, CCL5, CCL7, CCL8, CCR7, CD74, CKLF, CLSTN1, CSF3R, CX3CL1, CXADR, CXCL1, CXCL2, CXCL3, CXCL5, CXCL6, CXCL8, CXCR2, DAPK2, EDN1, EDN2, EDN3, EHHADH, FCER1G, GBF1, IFNG, IL1A, IL1B, IL1R1, IL23…	TRUE
GO:1902110	GO_BiologicalProcess-GOA_23.02.2017_10h01	positive regulation of mitochondrial membrane permeability involved in apoptotic process	[6, 7, 8, 9]	[Group096, Group109, Group117, Group122, Group160]	6	9.52381	1.63522e-07	2.95975e-05	{Group096=5.896738035562535E-21, Group109=9.5049965209969E-19, Group117=9.856959170040014E-12, Group122=1.1159148140695808E-17, Group160=2.095925753462619E-36}	{Group096=7.135053023030667E-19, Group109=9.219846625366993E-17, Group117=3.2527965261132046E-10, Group122=1.0154824808033186E-15, Group160=3.311562690470938E-34}	[ATF2, BAX, BCL2, CASP8, MAPK8, TP53]	[ACAA2, ATF2, ATPIF1, BAD, BAK1, BAX, BBC3, BCL2, BCL2L11, BID, BLOC1S2, BMF, BNIP3, BNIP3L, BOK, C22orf29, CASP8, DYNLL1, DYNLL2, E2F1, EYA1, EYA2, FZD9, GDNF, GSK3A, GSK3B, GZMB, HIP1R, HSPA1A, MAPK8, MOAP1, MPV17L, MUL1, NMT1, OPN1SW, PMAIP1, PPP1R13B, PPP3CC, PPP3R1, REXO2, RHOT1, RHOT2, SFN, SH3GLB1, SIVA1, SLC25A5, SLC35F6, SMYD1, TFDP1, TFDP2, TMEM102, TP53, TP53BP1, TP53BP2, TP63, TP73, Y…	TRUE
GO:0010574	GO_BiologicalProcess-GOA_23.02.2017_10h01	regulation of vascular endothelial growth factor production	[4, 5]	[Group051, Group054, Group066, Group080, Group086, Group099, Group103, Group111, Group113, Group150, Group152, Group159, Group161]	5	15.1515	1.72305e-07	3.10148e-05	{Group051=6.726258273302631E-25, Group054=3.353524727928328E-13, Group066=7.746471611713783E-23, Group080=2.1232905665321592E-17, Group086=1.2095964201304352E-16, Group099=5.555412196230995E-16, Group103=4.578328693136612E-19, Group111=1.595395626325167E-17, Group113=4.548470078238836E-20, Group150=6.47380039518465E-25, Group152=3.9478872628846304E-24, Group159=2.3614833448420293E-33, Group161=1.…	{Group051=9.28223641715763E-23, Group054=1.542621374847031E-11, Group066=9.99294837911078E-21, Group080=1.8684956985483E-15, Group086=9.676771361043482E-15, Group099=4.055450903248627E-14, Group103=4.7156785539307104E-17, Group111=1.4358560636926502E-15, Group113=5.094286487627496E-18, Group150=8.998582549306663E-23, Group152=5.329647804894251E-22, Group159=3.6839140179535657E-31, Group161=1.9458…	[CCL2, IL1A, IL1B, IL6, PTGS2]	[ADORA2B, ARNT, ATF4, BRCA1, C3, C3AR1, C5, C5AR1, CCBE1, CCL2, CCR2, CXCL17, CYP1B1, EIF2AK3, FLT4, GATA4, HIF1A, HPSE, IL1A, IL1B, IL6, IL6ST, ISL1, MIA3, NDRG2, NODAL, NOX1, NUTF2, PTGS2, RORA, SULF1, SULF2, TGFB1]	TRUE
GO:0019915	GO_BiologicalProcess-GOA_23.02.2017_10h01	lipid storage	[3, 4]	[Group075, Group082, Group108, Group114, Group115, Group125, Group132, Group133, Group138, Group139, Group142, Group149, Group153, Group156, Group159, Group161]	6	8.95522	2.37252e-07	4.05701e-05	{Group075=2.6908036920448136E-16, Group082=9.778798445098952E-9, Group108=1.0260577003899081E-11, Group114=2.1225869765692824E-15, Group115=5.1646959803579173E-14, Group125=7.480942316253816E-16, Group132=1.6327869166520973E-27, Group133=6.575467853059808E-19, Group138=2.2350029818032858E-20, Group139=2.373309952007317E-19, Group142=7.17431876360572E-19, Group149=2.409346134030596E-21, Group153=9…	{Group075=2.0719188428745066E-14, Group082=1.0756678289608847E-7, Group108=3.283384641247706E-10, Group114=1.4645850138328048E-13, Group115=2.995523668607592E-12, Group125=5.311469044540209E-14, Group132=2.383868898312062E-25, Group133=6.641222531590407E-17, Group138=2.6149534887098442E-18, Group139=2.5157085491277562E-17, Group142=7.174318763605721E-17, Group149=2.963495744857633E-19, Group153=1…	[APOE, IL1B, IL6, NFKB1, PPARG, TNF]	[ABCA1, ABCG1, ABHD5, ACACB, ACVR1C, ALKBH7, ANGPTL3, APOA1, APOB, APOC4, APOE, B4GALNT1, BSCL2, C3, CAV1, CD36, CIDEA, CRP, CRY1, CRY2, CSRP1, DGAT1, DGAT2, EHD1, ENPP1, FBXW7, FFAR2, FITM1, FITM2, FTO, GM2A, HEXB, HILPDA, IKBKE, IL1B, IL6, ITGAV, ITGB3, LCP1, LDAH, LEP, LPL, MSR1, NFKB1, NFKBIA, NR1H2, NR1H3, NRIP1, OSBPL11, OSBPL8, PLA2G10, PLIN2, PLIN5, PNPLA2, PPARA, PPARG, PPIAP10, PTPN2, S…	TRUE
GO:0043112	GO_BiologicalProcess-GOA_23.02.2017_10h01	receptor metabolic process	[4, 5]	[Group011, Group076, Group161]	8	4.7619	2.91704e-07	4.9298e-05	{Group011=3.252980946800273E-10, Group076=5.586511777497201E-15, Group161=1.2972628010365007E-28}	{Group011=6.180663798920519E-9, Group076=3.631232655373181E-13, Group161=1.945894201554751E-26}	[ACE2, APOE, CD81, CXCL8, GRB2, IL10, PPARG, TNF]	[ACE2, ACHE, ACKR3, ADIPOQ, ADM, AHI1, ALS2, ANGPT1, ANKRD13C, ANXA2, AP1AR, AP2B1, APOE, ARAP1, ARF1, ARF1P1, ARFGEF2, ARRB1, ARRB2, ATAD1, ATXN2, BECN1, BECN2, BVES, C1D, CACNG2, CALCA, CALCR, CALCRL, CAMLG, CAPN1, CAV1, CAV3, CCL14, CD36, CD63, CD81, CD9, CDK5, CEACAM1, CHMP5, CLTC, CNPY2, CNTN2, CXCL8, CXCR1, CXCR2, DKK1, DLG4, DMD, DNM1, DNM2, DNM3, DRD2, DRD3, ECE1, EDN1, EGF, EHD3, EPS15, …	TRUE
GO:0071887	GO_BiologicalProcess-GOA_23.02.2017_10h01	leukocyte apoptotic process	[6]	[Group137, Group140, Group160, Group161]	7	6.14035	3.02787e-07	5.08683e-05	{Group137=1.0770586316843705E-11, Group140=1.0731331045036508E-17, Group160=2.095925753462619E-36, Group161=1.2972628010365007E-28}	{Group137=3.231175895053112E-10, Group140=9.872824561433587E-16, Group160=3.311562690470938E-34, Group161=1.945894201554751E-26}	[BAX, ICAM1, IFNG, IL10, IL2, IL6, TP53]	[ADA, ADAM17, ADAM8, AKT1, AMH, ANXA1, AURKB, AXL, BAK1, BAX, BBC3, BCL10, BCL2L11, BCL6, BIRC7, BMP4, BPNT1, BTK, CCL19, CCL21, CCL5, CCR7, CD27, CD274, CD3G, CD74, CDKN2A, CLC, CLCF1, CLSTN1, CTSL, CXCL12, DFFA, DNAJA3, DOCK8, EFNA1, FADD, FAS, FASLG, FASN, FCAR, FCER1G, FNIP1, FOXP1, GAS6, GIMAP8, GLI3, GPAM, HCAR2, HCLS1, HIF1A, HSH2D, ICAM1, IDO1, IFNG, IL10, IL2, IL2RA, IL6, IRF3, IRF7, IRS…	TRUE
GO:1903034	GO_BiologicalProcess-GOA_23.02.2017_10h01	regulation of response to wounding	[4, 5]	[Group042, Group046, Group063, Group079, Group093, Group146]	8	4.70588	3.19346e-07	5.30114e-05	{Group042=3.087487453903566E-14, Group046=1.7206874458711569E-15, Group063=1.691568844596322E-11, Group079=8.893212916361293E-15, Group093=6.491736171405106E-16, Group146=5.380402153400938E-28}	{Group042=1.8833673468811752E-12, Group046=1.2044812121098097E-13, Group063=4.398078995950437E-10, Group079=5.691656266471228E-13, Group093=4.674050043411676E-14, Group146=7.909191165499379E-26}	[APOE, CCL2, IL10, NOS3, PRKCA, PRKCE, SERPINE1, SMAD3]	[ABAT, ADAMTS18, ADRA2A, AGER, ALOX12, ANO6, ANXA1, ANXA2, APCS, APOE, APOH, ARFGEF1, ASIC2, ATP7A, ATXN3, BRAF, C1QTNF1, C6orf1, CAPN3, CASK, CAV1, CCL2, CD109, CD34, CD36, CEACAM1, CEL, CERS2, CLASP1, CLASP2, CLEC4M, CNTF, CNTN1, CPB2, CRK, CXXC1, DMTN, EDN1, ENPP4, EPHA4, EPPK1, F11, F12, F2, F2R, F2RL1, F3, F7, FAM46A, FAP, FCER1G, FGA, FGB, FGF13, FGF2, FGG, FKBP1B, FOXA2, FOXC2, GJA1, GJD4,…	TRUE
GO:0046889	GO_BiologicalProcess-GOA_23.02.2017_10h01	positive regulation of lipid biosynthetic process	[4, 5, 6, 7]	[Group014, Group057, Group069, Group114, Group130, Group142, Group158, Group161]	6	8.4507	3.36341e-07	5.516e-05	{Group014=3.115639175355854E-10, Group057=4.253617063750937E-13, Group069=2.746894291012695E-12, Group114=2.1225869765692824E-15, Group130=8.72359720625284E-19, Group142=7.17431876360572E-19, Group158=2.1814444388913482E-30, Group161=1.2972628010365007E-28}	{Group014=6.231278350711708E-9, Group057=1.8715915080504124E-11, Group069=9.888819447645703E-11, Group114=1.4645850138328048E-13, Group130=8.549125262127783E-17, Group142=7.174318763605721E-17, Group158=3.3594244358926764E-28, Group161=1.945894201554751E-26}	[APOE, CREB1, IFNG, IL1B, PTGS2, TNF]	[ABCG1, ABHD6, ACSL3, ADGRF5, AKT1, ANXA1, APOA1, APOA4, APOA5, APOC2, APOE, AVP, AVPR1A, BMP6, C13662, CCDC3, CNEP1R1, CREB1, CREBL2, CTDNEP1, CYR61, DGAT2, FABP3, FAM58A, FGF1, GPLD1, GUCY2C, HSD17B13, HTR2A, HTR2B, HTR2C, IFNAR1, IFNG, IL1B, INS, LDLR, MID1IP1, MLXIPL, MTOR, NLRP3, NR1D1, NR1H2, NR1H3, NR1H4, NSMAF, PLA2G6, PLIN5, POR, PPARGC1A, PRKAA1, PRKCD, PTGS2, RACK1, RGN, RNU1-93P, SCAR…	TRUE
GO:0045598	GO_BiologicalProcess-GOA_23.02.2017_10h01	regulation of fat cell differentiation	[4, 5, 6]	[Group047, Group055, Group081, Group104, Group142, Group153, Group156, Group161]	7	5.83333	4.29741e-07	7.00478e-05	{Group047=3.9053239828330067E-10, Group055=1.6001975949374276E-14, Group081=2.3550023519198475E-19, Group104=5.90642690918055E-14, Group142=7.17431876360572E-19, Group153=9.632572699614655E-25, Group156=2.39789469623427E-30, Group161=1.2972628010365007E-28}	{Group047=6.639050770816111E-9, Group055=1.0081244848105795E-12, Group081=2.5198525165542367E-17, Group104=3.2485348000493025E-12, Group142=7.174318763605721E-17, Group153=1.3196624598472077E-22, Group156=3.668778885238433E-28, Group161=1.945894201554751E-26}	[CREB1, IL6, MAPK14, PPARG, PTGS2, SMAD3, TNF]	[AAMDC, ADIG, ADIPOQ, ADIRF, AKT1, ALMS1, ARNTL, ASXL1, ASXL2, ATAT1, AXIN1, BBS12, BMP2, C1QL4, C21orf33, CARM1, CCDC3, CCDC85B, CEBPA, CEBPB, CMKLR1, CREB1, CREBL2, DDIT3, DKKL1, DLK2, DUSP10, E2F1, ENPP1, FAM57B, FNDC5, FOXO1, FRZB, FTO, GATA2, GATA3, GDF3, GPER1, GRIP1, HDAC6, HES1, HTR2A, HTR2C, ID2, ID4, IL6, INS, INSIG1, JAG1, JDP2, KLF5, LEP, LGALS12, LMO3, LRP5, MAPK14, MEDAG, METRNL, ME…	TRUE
GO:0034605	GO_BiologicalProcess-GOA_23.02.2017_10h01	cellular response to heat	[4, 5]	[Group020, Group048, Group066, Group078]	7	5.64516	5.37138e-07	8.70163e-05	{Group020=2.552530913936693E-12, Group048=2.4289727240682905E-19, Group066=7.746471611713783E-23, Group078=9.848377456993859E-21}	{Group020=9.699617472959434E-11, Group048=2.550421360271705E-17, Group066=9.99294837911078E-21, Group078=1.1818052948392632E-18}	[CXCL10, HMOX1, IL1A, MAPK1, MAPK3, PRKCA, PTGS2]	[AAAS, AKT1S1, ANO1, ANTXR1, ARPP21, ATM, ATR, ATXN3, ATXN8, BAG1, BAG2, BAG3, BAG4, BAG5, C8orf4, CAMK2A, CAMK2B, CAMK2D, CAMK2G, CCAR2, CD34, CDKN1A, CETN1, CHORDC1, CLPB, CREBBP, CRYAB, CXCL10, DAXX, DNAJB1, DNAJB6, DNAJC2, DNAJC7, EIF2S1, EP300, FGF1, FKBP4, FKBPL, GSK3B, HDAC2, HIKESHI, HMOX1, HSBP1, HSF1, HSP90AA1, HSP90AB1, HSPA1A, HSPA1B, HSPA1L, HSPA6, HSPA8, HSPB8, HSPH1, HTRA2, IER5, I…	TRUE
GO:1904036	GO_BiologicalProcess-GOA_23.02.2017_10h01	negative regulation of epithelial cell apoptotic process	[6, 7, 8]	[Group006, Group009, Group134, Group151, Group159, Group160, Group161]	5	11.6279	6.78031e-07	0.000105095	{Group006=6.140089101751711E-12, Group009=2.4654074502560813E-10, Group134=5.416335777720201E-14, Group151=5.6806760749081155E-21, Group159=2.3614833448420293E-33, Group160=2.095925753462619E-36, Group161=1.2972628010365007E-28}	{Group006=2.0876302945955815E-10, Group009=5.177355645537771E-9, Group134=3.0331480355233125E-12, Group151=6.930424811387901E-19, Group159=3.6839140179535657E-31, Group160=3.311562690470938E-34, Group161=1.945894201554751E-26}	[HMOX1, ICAM1, IL10, IL4, SERPINE1]	[ABL1, ANGPT1, ANGPTL4, BRAF, CAST, CD3EAP, CFLAR, ERC2, FGA, FGB, FGF21, FGG, GAS6, GATA3, HMOX1, ICAM1, IL10, IL13, IL4, KDR, KRIT1, MAPK7, MEN1, MST1, MTOR, NDNF, NEUROD1, NFE2L2, PDHX, PDX1, RAMP2, SCG2, SEMA5A, SERPINB13, SERPINE1, SRSF6, STK4, TCF7L2, TEK, TERT, TNFAIP3, TNIP2, WFS1]	TRUE
GO:0042832	GO_BiologicalProcess-GOA_23.02.2017_10h01	defense response to protozoan	[4, 5, 6]	[Group098, Group115, Group134, Group135, Group138, Group145, Group148, Group151, Group159, Group161]	4	21.0526	7.95349e-07	0.000120098	{Group098=1.7727505368998016E-13, Group115=5.1646959803579173E-14, Group134=5.416335777720201E-14, Group135=2.6641611867720388E-12, Group138=2.2350029818032858E-20, Group145=8.291268333444812E-26, Group148=7.862789791132838E-14, Group151=5.6806760749081155E-21, Group159=2.3614833448420293E-33, Group161=1.2972628010365007E-28}	{Group098=8.509202577119047E-12, Group115=2.995523668607592E-12, Group134=3.0331480355233125E-12, Group135=9.857396391056543E-11, Group138=2.6149534887098442E-18, Group145=1.1607775666822736E-23, Group148=4.2459064872117324E-12, Group151=6.930424811387901E-19, Group159=3.6839140179535657E-31, Group161=1.945894201554751E-26}	[IFNG, IL10, IL4, IL6]	[BATF, BATF2, BCL3, CCDC88B, CD40, CLEC7A, HRAS, IFNG, IL10, IL12A, IL12B, IL4, IL4R, IL6, IRF4, IRF8, LYST, SLC11A1, TSPAN32]	TRUE
GO:0035994	GO_BiologicalProcess-GOA_23.02.2017_10h01	response to muscle stretch	[4]	[Group015, Group041, Group102, Group126, Group139, Group159]	4	19.0476	1.22089e-06	0.000179471	{Group015=4.55560379306427E-8, Group041=1.01839353956105E-12, Group102=5.266614387496279E-16, Group126=5.208615599587011E-13, Group139=2.373309952007317E-19, Group159=2.3614833448420293E-33}	{Group015=2.733362275838562E-7, Group041=4.175413512200305E-11, Group102=3.897294646747246E-14, Group126=2.2397047078224147E-11, Group139=2.5157085491277562E-17, Group159=3.6839140179535657E-31}	[FOS, MAPK14, NFKB1, RELA]	[ANKRD1, CAV3, CSRP3, DMD, EDN1, FOS, GNPDA1, GPI, JUN, MAPK14, NFKB1, NFKBIA, NPPA, RAF1, RELA, RNASE3, RYR2, SLC8A1, SLC9A1, TCAP, TTN]	TRUE
GO:0045833	GO_BiologicalProcess-GOA_23.02.2017_10h01	negative regulation of lipid metabolic process	[3, 4, 5, 6]	[Group069, Group108, Group114, Group118, Group125, Group139, Group158, Group161]	6	6.74157	1.29155e-06	0.000187274	{Group069=2.746894291012695E-12, Group108=1.0260577003899081E-11, Group114=2.1225869765692824E-15, Group118=4.905106245059882E-26, Group125=7.480942316253816E-16, Group139=2.373309952007317E-19, Group158=2.1814444388913482E-30, Group161=1.2972628010365007E-28}	{Group069=9.888819447645703E-11, Group108=3.283384641247706E-10, Group114=1.4645850138328048E-13, Group118=6.916199805534434E-24, Group125=5.311469044540209E-14, Group139=2.5157085491277562E-17, Group158=3.3594244358926764E-28, Group161=1.945894201554751E-26}	[APOE, IL1B, NFKB1, PIK3CG, SOD1, TNF]	[ACACB, ACADL, ACADVL, ADORA1, ADRA2A, AKR1C3, AKT1, APOA2, APOBEC1, APOC1, APOC2, APOC3, APOD, APOE, ATP1A1, ATP1A3, ATP1A4, BMP2, BMP5, BRCA1, BSCL2, CEACAM1, CIDEA, CNR1, CRTC3, CYP27B1, DAB2IP, DGAT2, DKK3, ERLIN1, ERLIN2, ETFBKMT, FBXW7, FGF19, FMC1, GFI1, GPER1, GPLD1, HCAR2, IL1B, INS, INSIG1, INSIG2, LPAL2, LPCAT1, MALRD1, NFKB1, NR1H4, ORMDL1, ORMDL2, ORMDL3, PCDHA4, PCDHA@, PDE3B, PDGFA…	TRUE
GO:0045123	GO_BiologicalProcess-GOA_23.02.2017_10h01	cellular extravasation	[3, 5, 6, 7]	[Group009, Group012, Group080, Group103, Group127, Group154, Group159, Group161]	5	10	1.46116e-06	0.000210408	{Group009=2.4654074502560813E-10, Group012=8.013288701897547E-9, Group080=2.1232905665321592E-17, Group103=4.578328693136612E-19, Group127=9.796760338000124E-17, Group154=1.203528415039811E-23, Group159=2.3614833448420293E-33, Group161=1.2972628010365007E-28}	{Group009=5.177355645537771E-9, Group012=9.615946442277057E-8, Group080=1.8684956985483E-15, Group103=4.7156785539307104E-17, Group127=7.9353758737801E-15, Group154=1.6006927920029487E-21, Group159=3.6839140179535657E-31, Group161=1.945894201554751E-26}	[CCL2, ICAM1, IL1A, PIK3CG, TNF]	[ABR, ADAM8, ADD2, AZU1, BCR, BST1, CCL2, CCL21, CCL25, CCL28, CCR2, CLSTN1, CX3CL1, CXCL12, ELANE, ENC1, FADD, FER, GCNT1, GOLPH3, ICAM1, IL1A, IL1R1, ITGA1, ITGA4, ITGB1, ITGB2, ITGB7, JAML, LEP, MADCAM1, PDGFD, PECAM1, PIK3CD, PIK3CG, PLCB1, PLVAP, PODXL2, PTAFR, PTGER4, RIPK3, RN7SL263P, ROCK1, SELE, SELENOP, SELP, SELPLG, TNF, TREM1, VCAM1]	TRUE
GO:0001776	GO_BiologicalProcess-GOA_23.02.2017_10h01	leukocyte homeostasis	[2, 5]	[Group024, Group092, Group131, Group133, Group136, Group137, Group140, Group160, Group161]	6	6.25	2.01676e-06	0.000282346	{Group024=1.0110325961232061E-7, Group092=5.2205935367859703E-23, Group131=8.965170180080678E-17, Group133=6.575467853059808E-19, Group136=1.8509521382527809E-22, Group137=1.0770586316843705E-11, Group140=1.0731331045036508E-17, Group160=2.095925753462619E-36, Group161=1.2972628010365007E-28}	{Group024=5.05516298061603E-7, Group092=6.786771597821762E-21, Group131=7.351439547666156E-15, Group133=6.641222531590407E-17, Group136=2.313690172815976E-20, Group137=3.231175895053112E-10, Group140=9.872824561433587E-16, Group160=3.311562690470938E-34, Group161=1.945894201554751E-26}	[BAX, BCL2, CASP3, IFNG, IL2, IL6]	[ABL1, ADA, ADAM17, AKT1, AMH, ANXA1, AXL, BAK1, BAP1, BAX, BCL10, BCL2, BCL2L11, CACNA1F, CASP3, CCNB2, CD74, CLSTN1, CORO1A, DNAJA3, DOCK10, DOCK11, FADD, FAS, FASN, FCAR, FCER1G, FLT3, FOXN1, FOXP3, GAPT, GPAM, GPR174, GPR183, HCAR2, HIF1A, HMGB1, IFNG, IL2, IL2RA, IL6, ITPKB, JAK3, JAM3, KITLG, LAT, LGALS9, LMO1, LYN, MAGI1, MEF2C, MERTK, MIF, MTHFD1, NCKAP1L, NKX2-3, ORC3, P2RX7, PDE4B, PIK3…	TRUE
GO:0055094	GO_BiologicalProcess-GOA_23.02.2017_10h01	response to lipoprotein particle	[3, 4]	[Group011, Group026, Group076, Group125, Group159, Group161]	4	16.6667	2.14854e-06	0.000298646	{Group011=3.252980946800273E-10, Group026=1.053669339831007E-8, Group076=5.586511777497201E-15, Group125=7.480942316253816E-16, Group159=2.3614833448420293E-33, Group161=1.2972628010365007E-28}	{Group011=6.180663798920519E-9, Group026=9.483024058479063E-8, Group076=3.631232655373181E-13, Group125=5.311469044540209E-14, Group159=3.6839140179535657E-31, Group161=1.945894201554751E-26}	[APOE, CCL2, CD81, PPARG]	[ABCA1, ABCG1, ADAM17, APOE, CASR, CCL2, CD36, CD81, CD9, CDH13, FCER1G, FGF21, HMGCS1, ITGB1, ITGB2, LCP1, LDLR, LPL, NPC1, PPARG, SIGLEC15, SOCS5, SREBF2, SYK]	TRUE
GO:0001892	GO_BiologicalProcess-GOA_23.02.2017_10h01	embryonic placenta development	[3, 4, 5, 6, 7, 8]	[Group010, Group031, Group159]	6	6.12245	2.27596e-06	0.000311806	{Group010=1.2309986704583822E-9, Group031=1.01839353956105E-12, Group159=2.3614833448420293E-33}	{Group010=1.8464980056875732E-8, Group031=4.175413512200305E-11, Group159=3.6839140179535657E-31}	[CASP8, CSF2, EGFR, GRB2, IL10, MAPK1]	[ADM, AKT1, ARNT, ASCL2, BIRC6, BMP5, BMP7, BPTF, C21orf33, CASP8, CDKN1C, CDX2, CDX4, CEBPA, CEBPB, CITED1, CSF2, CYR61, E2F7, E2F8, EGFR, EGLN1, EOMES, EPAS1, FBXW8, FGFR2, FZD5, GAB1, GATA2, GCM1, GCM2, GGNBP2, GJB5, GRB2, GRHL2, HAND1, HES1, HEY1, HEY2, HIF1A, HS6ST1, HSF1, IL10, JUNB, KRT19, KRT8, LEF1, LIF, MAP2K1, MAPK1, MBD4, MDFI, MED1, MIA3, NCOA1, NODAL, NR2F1, NR2F2, NRK, NSDHL, OVOL2…	TRUE
GO:0008585	GO_BiologicalProcess-GOA_23.02.2017_10h01	female gonad development	[4, 5, 6, 7, 8]	[Group019, Group029, Group045, Group060, Group095, Group120, Group158, Group160]	6	6.06061	2.41539e-06	0.000326078	{Group019=3.490201866799155E-10, Group029=1.537248125048842E-10, Group045=3.066582739010323E-17, Group060=4.473753820840397E-19, Group095=7.872064311268882E-19, Group120=1.0480295495135786E-20, Group158=2.1814444388913482E-30, Group160=2.095925753462619E-36}	{Group019=6.28236336023848E-9, Group029=3.535670687612336E-9, Group045=2.667926982938981E-15, Group060=4.652703973674013E-17, Group095=7.793343668156193E-17, Group120=1.2471551639211586E-18, Group158=3.3594244358926764E-28, Group160=3.311562690470938E-34}	[BAX, BCL2, BCL2L1, ICAM1, NOS3, SOD1]	[ADAMTS1, ADCYAP1, AFP, AMH, AMHR2, ANG, ARRB1, ARRB2, ATM, BAX, BCL2, BCL2L1, BMP15, BMPR1B, BRCA2, CASP2, CCDC182, CEBPB, COL9A3, CTNNA1, CYP19A1, DMC1, DMRTA1, EIF2B2, EIF2B4, EIF2B5, EREG, ESR1, FANCA, FANCF, FANCG, FOXC1, FOXL2, FOXO3, FSHB, FSHR, FZD4, GDF9, GNRH1, GPR149, HID1, ICAM1, IDH1, IMMP2L, INHA, INHBA, INHBB, INSR, KIT, KITLG, KMT2B, LEP, LFNG, LHCGR, LHX8, LHX9, MMP14, MMP19, MSH…	TRUE
GO:0015908	GO_BiologicalProcess-GOA_23.02.2017_10h01	fatty acid transport	[5, 6, 7, 8, 9]	[Group026, Group040, Group082, Group125, Group146, Group161]	6	6.06061	2.41539e-06	0.000326078	{Group026=1.053669339831007E-8, Group040=1.6550600522035983E-11, Group082=9.778798445098952E-9, Group125=7.480942316253816E-16, Group146=5.380402153400938E-28, Group161=1.2972628010365007E-28}	{Group026=9.483024058479063E-8, Group040=4.4686621409497153E-10, Group082=1.0756678289608847E-7, Group125=5.311469044540209E-14, Group146=7.909191165499379E-26, Group161=1.945894201554751E-26}	[ACE, APOE, IL1B, NOS2, PLA2G4A, PPARG]	[ABCC2, ABCC4, ABCD1, ABCD2, ABCD3, ACACA, ACACB, ACE, ACSL1, ACSL3, ACSL4, AGTR2, AKT1, AKT2, AMH, ANXA1, APOE, BDKRB1, BDKRB2, C00746, C15865, CD36, CPT1A, CPT1B, CPT2, CROT, CYP4A11, CYP4F2, DRD2, DRD3, DRD4, EDN1, ERFE, FABP1, FABP3, GOT2, GPNMB, HNF1A, IL1B, IRS2, LCN1, LCN12, LEP, MAP2K6, MFSD2A, MID1IP1, MIF, NANOS2, NCOR1, NMB, NMUR2, NOS2, NTSR1, OC90, OXT, P2RX4, P2RX7, PLA2G10, PLA2G12…	TRUE
GO:0002544	GO_BiologicalProcess-GOA_23.02.2017_10h01	chronic inflammatory response	[5]	[Group027, Group042, Group093, Group098, Group127, Group134, Group135, Group150, Group157, Group159, Group161]	4	16	2.55025e-06	0.000341734	{Group027=2.6415810914468555E-9, Group042=3.087487453903566E-14, Group093=6.491736171405106E-16, Group098=1.7727505368998016E-13, Group127=9.796760338000124E-17, Group134=5.416335777720201E-14, Group135=2.6641611867720388E-12, Group150=6.47380039518465E-25, Group157=6.014358351570216E-37, Group159=2.3614833448420293E-33, Group161=1.2972628010365007E-28}	{Group027=3.698213528025598E-8, Group042=1.8833673468811752E-12, Group093=4.674050043411676E-14, Group098=8.509202577119047E-12, Group127=7.9353758737801E-15, Group134=3.0331480355233125E-12, Group135=9.857396391056543E-11, Group150=8.998582549306663E-23, Group157=9.562829778996643E-35, Group159=3.6839140179535657E-31, Group161=1.945894201554751E-26}	[CCL2, IL10, IL4, TNF]	[ADORA2B, AHCY, CAMP, CCL11, CCL2, CCL5, CEBPB, CHAMP1, CX3CR1, CXCL13, CYP19A1, FOXP3, GJA1, IDO1, IL10, IL4, LTA, PTGES, S100A8, THBS1, TNF, TNFAIP3, UNC13D, VCAM1, VNN1]	TRUE
GO:0002285	GO_BiologicalProcess-GOA_23.02.2017_10h01	lymphocyte activation involved in immune response	[3, 4, 5, 6]	[Group126, Group132, Group135, Group137, Group138, Group161]	7	4.43038	2.73922e-06	0.000358838	{Group126=5.208615599587011E-13, Group132=1.6327869166520973E-27, Group135=2.6641611867720388E-12, Group137=1.0770586316843705E-11, Group138=2.2350029818032858E-20, Group161=1.2972628010365007E-28}	{Group126=2.2397047078224147E-11, Group132=2.383868898312062E-25, Group135=9.857396391056543E-11, Group137=3.231175895053112E-10, Group138=2.6149534887098442E-18, Group161=1.945894201554751E-26}	[CD40LG, ICAM1, IFNG, IL10, IL2, IL4, IL6]	[ABL1, ADA, AICDA, ANXA1, AP1G1, APBB1IP, APLF, ARTN, ATAD5, ATP7A, BATF, BCL3, BCL6, CCL19, CCR6, CD180, CD1C, CD244, CD28, CD40, CD40LG, CD46, CD80, CD86, CDH17, CEACAM1, CLCF1, CLEC4D, CLEC4E, CORO1A, DLL1, DOCK10, DOCK11, EIF2AK4, EOMES, ERCC1, EXO1, EXOSC3, EXOSC6, F2RL1, FCER1G, FOXP1, FOXP3, GAPT, GATA3, GPR183, HAVCR2, HLA-DMB, HLX, HMGB1, HSPD1, ICAM1, IFNA1, IFNA10, IFNA14, IFNA16, IFNA…	TRUE
GO:0007569	GO_BiologicalProcess-GOA_23.02.2017_10h01	cell aging	[4]	[Group007, Group017, Group029, Group044, Group095, Group120, Group160]	6	5.76923	3.22118e-06	0.00040909	{Group007=1.2654978389004852E-8, Group017=4.467650970822906E-20, Group029=1.537248125048842E-10, Group044=4.186338009055683E-13, Group095=7.872064311268882E-19, Group120=1.0480295495135786E-20, Group160=2.095925753462619E-36}	{Group007=1.0123982711203881E-7, Group017=5.048445597029884E-18, Group029=3.535670687612336E-9, Group044=1.8838521040750574E-11, Group095=7.793343668156193E-17, Group120=1.2471551639211586E-18, Group160=3.311562690470938E-34}	[BCL2, ICAM1, MAPK14, SERPINE1, SOD1, TP53]	[ABL1, AMH, ANTXR1, ARNTL, ATM, ATR, BCL2, BCL2L12, BCL6, BGLAP, BMPR1A, BRCA2, C2orf40, CALR, CDK1, CDK6, CDKN1A, CDKN2A, CHEK1, CHEK2, CITED2, CTC1, DNAJA3, EEF1E1, ENG, ERCC1, FOXM1, FZR1, H2AFX, HMGA1, HMGA2, HRAS, ICAM1, ID2, ILK, ING2, ING3, INGX, KAT6A, KRAS, LIMS1, LMNA, MAGEA2, MAP2K1, MAPK14, MAPKAPK5, MARCH5, MED12, MIF, MMAB, MME, MMP12, MNT, MORC3, MTOR, NEK4, NEK6, NOX4, NPM1, NSMCE…	TRUE
GO:0031341	GO_BiologicalProcess-GOA_23.02.2017_10h01	regulation of cell killing	[2, 3]	[Group036, Group077, Group103, Group135, Group159, Group161]	5	8.33333	3.65435e-06	0.000453139	{Group036=1.0299156926148561E-11, Group077=1.4816838565081345E-16, Group103=4.578328693136612E-19, Group135=2.6641611867720388E-12, Group159=2.3614833448420293E-33, Group161=1.2972628010365007E-28}	{Group036=3.192738647106054E-10, Group077=1.1705302466414263E-14, Group103=4.7156785539307104E-17, Group135=9.857396391056543E-11, Group159=3.6839140179535657E-31, Group161=1.945894201554751E-26}	[CCL2, ICAM1, IFNG, IL4, NOS2]	[AGER, AP1G1, ARRB2, B2M, BAD, BCL2L11, CADM1, CCL2, CD226, CEACAM1, CRK, CRTAM, F2RL1, FADD, FCER2, HAVCR2, HLA-A, HLA-B, HLA-E, HSP90AB1, ICAM1, IFNG, IL12A, IL12B, IL12RB1, IL13, IL21, IL23A, IL23R, IL4, IL7R, KLRK1, LAG3, LAMP1, LEP, LGALS9, LILRB1, MICA, NANOS2, NCR1, NCR3, NECTIN2, NOS2, P2RX7, PIK3R6, PPP3CB, PTPRC, PVR, RASGRP1, RIPK3, SERPINB4, SERPINB9, SH2D1A, SLAMF6, STAP1, STAT5B, ST…	TRUE
GO:0051926	GO_BiologicalProcess-GOA_23.02.2017_10h01	negative regulation of calcium ion transport	[4, 5, 6, 7, 8, 9, 10]	[Group029, Group045, Group060, Group073, Group112, Group154, Group160]	5	8.19672	3.96863e-06	0.000484172	{Group029=1.537248125048842E-10, Group045=3.066582739010323E-17, Group060=4.473753820840397E-19, Group073=3.0729508041895474E-17, Group112=2.0443419021937814E-23, Group154=1.203528415039811E-23, Group160=2.095925753462619E-36}	{Group029=3.535670687612336E-9, Group045=2.667926982938981E-15, Group060=4.652703973674013E-17, Group073=2.6427376916030108E-15, Group112=2.6780878918738537E-21, Group154=1.6006927920029487E-21, Group160=3.311562690470938E-34}	[BCL2, CALM1, ICAM1, NOS3, PTGS2]	[ADRA2A, APP, ATP1A2, BCL2, C18200, CALCA, CALM1, CASQ2, CAV3, CBARP, CLIC2, CRHR1, DRD2, DRD4, EPO, EPPIN, EPX, FKBP1B, FMR1, FMR1-IT1, GNAO1, GNB5, GPR35, GSTM2, GSTO1, HRC, ICAM1, INPP5K, LILRB1, LILRB2, MRLN, NANOS1, NANOS3, NOS1, NOS3, NTSR1, OPRL1, OR13F1, OR56A1, OR56A4, OR56A5, OR5T1, PACSIN3, PKD2, PLN, PRKD2, PTGS2, SEMG1, SESTD1, SLC30A1, SLN, SPINK1, SRI, STC1, TGFB1, TIMP1, TLR9, TMB…	TRUE
GO:0051101	GO_BiologicalProcess-GOA_23.02.2017_10h01	regulation of DNA binding	[4]	[Group032, Group151]	6	5.04202	7.03617e-06	0.000788051	{Group032=1.0612168011302865E-10, Group151=5.6806760749081155E-21}	{Group032=2.6530420028257164E-9, Group151=6.930424811387901E-19}	[HMOX1, IFNG, MAPK8, PARP1, PPARG, RB1]	[ACD, AGER, ANKRD33, ANKRD52, BCL3, C21orf33, CDCA5, CDT1, CEBPG, CPNE1, CSNK2B, CTNNB1, CTNNBIP1, DDIT3, DDRGK1, DOT1L, E2F1, EDF1, EGF, ERCC2, ERCC4, FOXC1, GATA1, GATA3, GTF2B, GZMA, HABP4, HAND1, HAND2, HDAC2, HDAC8, HES1, HEY1, HEY2, HIPK2, HJURP, HMGA2, HMGB1, HMGB2, HMOX1, ID1, ID2, IFI16, IFNG, IGF1, IRF4, ISL1, ITGA2, JAK2, JUN, KAT2A, KDM1A, KLF4, LEF1, LHX2, LIF, MAD2L2, MAPK8, MDFI, M…	TRUE
GO:0033198	GO_BiologicalProcess-GOA_23.02.2017_10h01	response to ATP	[4, 5, 6]	[Group084, Group099, Group113, Group152, Group161]	4	12.1212	8.05736e-06	0.000878252	{Group084=9.938191658653112E-14, Group099=5.555412196230995E-16, Group113=4.548470078238836E-20, Group152=3.9478872628846304E-24, Group161=1.2972628010365007E-28}	{Group084=5.068477745913087E-12, Group099=4.055450903248627E-14, Group113=5.094286487627496E-18, Group152=5.329647804894251E-22, Group161=1.945894201554751E-26}	[CCL2, IL1B, PTGS2, SOD1]	[ASPH, C12orf76, CASP1, CCL2, CIB2, DGKQ, DNTT, HSP90B1, HSPD1, IL1B, KCNJ11, P2RX1, P2RX2, P2RX3, P2RX4, P2RX5, P2RX6, P2RX7, P2RY11, P2RY12, PANX1, PDXP, PKLR, PTEN, PTGS2, RYR3, SELL, SLC8A1, SOD1, SSH1, TAF1, TRPC3, TRPV1]	TRUE
GO:0010507	GO_BiologicalProcess-GOA_23.02.2017_10h01	negative regulation of autophagy	[5, 6, 7]	[Group038, Group090, Group092, Group110, Group121, Group133, Group136, Group160, Group161]	5	7.04225	8.42712e-06	0.000901702	{Group038=7.255481590296722E-10, Group090=1.5479791277768595E-23, Group092=5.2205935367859703E-23, Group110=1.095475490592073E-21, Group121=8.591502166967616E-20, Group133=6.575467853059808E-19, Group136=1.8509521382527809E-22, Group160=2.095925753462619E-36, Group161=1.2972628010365007E-28}	{Group038=1.1608770544474755E-8, Group090=2.0433324486654544E-21, Group092=6.786771597821762E-21, Group110=1.3583896083341706E-19, Group121=9.278822340325026E-18, Group133=6.641222531590407E-17, Group136=2.313690172815976E-20, Group160=3.311562690470938E-34, Group161=1.945894201554751E-26}	[BCL2, BCL2L1, HMOX1, IL6, MCL1]	[AKT1, ATG7, BCL2, BCL2L1, BMF, CHMP4A, CHMP4B, CLEC16A, CTSA, DAP, DAPL1, DNPEP, EHMT2, EIF4G1, EIF4G2, FEZ1, FEZ2, GATA4, GOLGA2, HERC1, HGF, HMOX1, HTR2B, IAPP, IL6, KDM4A, KIF25, LARS, LEP, LEPR, LEPROT, LRRK2, LZTS1, MCL1, MET, MT3, MTM1, MTOR, NPC1, NRBP2, PHF23, PIK3CA, PINK1, POLDIP2, PTPN22, QSOX1, RASIP1, RNF41, RNF5, RNMT, RNU1-93P, RRAGA, RUBCN, SCFD1, SIRT2, SMCR8, SNCA, SNRNP70, SOS…	TRUE
GO:0043502	GO_BiologicalProcess-GOA_23.02.2017_10h01	regulation of muscle adaptation	[3, 4, 5, 6]	[Group013, Group021, Group046, Group063, Group146]	5	6.66667	1.1037e-05	0.00111474	{Group013=1.8634867332557528E-13, Group021=1.1086437902368568E-10, Group046=1.7206874458711569E-15, Group063=1.691568844596322E-11, Group146=5.380402153400938E-28}	{Group013=8.758387646302038E-12, Group021=2.660745096568456E-9, Group046=1.2044812121098097E-13, Group063=4.398078995950437E-10, Group146=7.909191165499379E-26}	[G6PD, NOS3, PARP1, PRKCA, SMAD3]	[ACTN3, AGT, AGXT, AIF1, AKAP13, AKAP6, ATP2A2, ATP2B4, BMP10, CAMK2B, CAMK2D, CAMK2G, CASQ1, CAV3, CDK9, CTDP1, DAG1, DDX39B, DMD, EDN1, ERRFI1, FBXO32, G6PD, GLRX3, GSK3A, GSK3B, GTF2I, GTF2IRD1, HAMP, HAND2, HDAC4, IGF1, IGFBP5, IL6ST, JARID2, KLF4, LMCD1, MEF2A, MTMR4, MTOR, MTPN, MYH7, MYOG, NANOS3, NOL3, NOS3, NR4A3, P2RX4, PAK1, PARP1, PDE5A, PDE9A, PDZD2, PIN1, PKN1, PPARGC1A, PPP3CA, PRK…	TRUE
GO:0048634	GO_BiologicalProcess-GOA_23.02.2017_10h01	regulation of muscle organ development	[4, 5, 6, 7]	[Group038, Group044, Group085, Group104, Group106, Group131, Group133, Group142, Group147, Group156, Group157, Group161]	6	4.61538	1.16917e-05	0.00116917	{Group038=7.255481590296722E-10, Group044=4.186338009055683E-13, Group085=2.6500112563124555E-15, Group104=5.90642690918055E-14, Group106=3.536637698216287E-14, Group131=8.965170180080678E-17, Group133=6.575467853059808E-19, Group142=7.17431876360572E-19, Group147=2.219335197191626E-28, Group156=2.39789469623427E-30, Group157=6.014358351570216E-37, Group161=1.2972628010365007E-28}	{Group038=1.1608770544474755E-8, Group044=1.8838521040750574E-11, Group085=1.8020076542924697E-13, Group104=3.2485348000493025E-12, Group106=2.1219826189297723E-12, Group131=7.351439547666156E-15, Group133=6.641222531590407E-17, Group142=7.174318763605721E-17, Group147=3.306809443815523E-26, Group156=3.668778885238433E-28, Group157=9.562829778996643E-35, Group161=1.945894201554751E-26}	[BCL2, CREB1, G6PD, IL6, MAPK14, SMAD3]	[ACTN3, AKAP6, ARNTL, ARRB2, BCL2, BMP10, BMP2, BMP4, BMPR1A, CAPN3, CAV3, CCNB1, CDK1, CDON, CENPF, CREB1, CTDP1, CTNNB1, CYP26B1, DCANP1, DDX17, DDX39B, DDX5, DKK1, DLL1, EDN1, EFNB2, ERBB3, ERBB4, FAM129B, FBXO22, FGF13, FGF2, FGF20, FGF3, FGF8, FGF9, FGFR1, FGFR2, FLOT1, FRS2, FZD7, G6PD, GATA6, GJA1, GPC1, GREM1, GSK3A, GSK3B, HAMP, HDAC4, HDAC9, HEY2, HMGCR, IGF1, IL6, JPH2, KCNK2, KLHL41, …	TRUE
GO:0010742	GO_BiologicalProcess-GOA_23.02.2017_10h01	macrophage derived foam cell differentiation	[6]	[Group010, Group025, Group077, Group125, Group153]	4	10.5263	1.43221e-05	0.00134628	{Group010=1.2309986704583822E-9, Group025=1.0149589553391206E-8, Group077=1.4816838565081345E-16, Group125=7.480942316253816E-16, Group153=9.632572699614655E-25}	{Group010=1.8464980056875732E-8, Group025=1.0149589553391207E-7, Group077=1.1705302466414263E-14, Group125=5.311469044540209E-14, Group153=1.3196624598472077E-22}	[CSF2, NFKB1, PPARG, STAT1]	[ABCA1, ABCA5, ABCG1, ADIPOQ, AGT, AGTR1, AGXT, ALOX15B, APOB, CD36, CETP, CRP, CSF1, CSF2, CSRP1, EP300, IL18, ITGAV, ITGB3, LCP1, LPL, MAPK9, MSR1, NFKB1, NFKBIA, NR1H2, NR1H3, PF4, PLA2G10, PLA2G2A, PPARA, PPARG, PPIAP10, PRKCH, SOAT1, SOAT2, STAT1, TGFB1]	TRUE
GO:0022612	GO_BiologicalProcess-GOA_23.02.2017_10h01	gland morphogenesis	[4, 5, 6, 7]	[Group023, Group024, Group049, Group062, Group085, Group117, Group131, Group133, Group140, Group145, Group156, Group158, Group160, Group161]	6	4.44444	1.45041e-05	0.00134888	{Group023=1.3370853332271275E-11, Group024=1.0110325961232061E-7, Group049=5.259467498051892E-14, Group062=4.359779768241478E-20, Group085=2.6500112563124555E-15, Group117=9.856959170040014E-12, Group131=8.965170180080678E-17, Group133=6.575467853059808E-19, Group140=1.0731331045036508E-17, Group145=8.291268333444812E-26, Group156=2.39789469623427E-30, Group158=2.1814444388913482E-30, Group160=2.…	{Group023=3.87754746635867E-10, Group024=5.05516298061603E-7, Group049=2.9978964738895782E-12, Group062=4.970148935795285E-18, Group085=1.8020076542924697E-13, Group117=3.2527965261132046E-10, Group131=7.351439547666156E-15, Group133=6.641222531590407E-17, Group140=9.872824561433587E-16, Group145=1.1607775666822736E-23, Group156=3.668778885238433E-28, Group158=3.3594244358926764E-28, Group160=3.3…	[BAX, BCL2, EGFR, IFNG, IL6, TNF]	[AKR1B1, AR, AREG, ARG1, B4GALT1, BAX, BCL2, BMP4, BMP7, BSX, BTBD7, BTRC, CAPN1, CAV1, CAV3, CCL11, CDC42, CEACAM1, CEBPB, CFLAR, CNRIP1, CPB2, CRIP1, CSF1, CSF1R, CUL3, CYP27B1, CYP7B1, DAG1, DDR1, DUOX2, EDA, EDAR, EGFR, ELF3, EPHA2, ESR1, ESRP2, ETV4, ETV5, FBXW7, FEM1B, FGF10, FGF7, FGF8, FGFR1, FGFR2, FOXA1, FRS2, GDF7, GLI1, GLI2, GLI3, HGF, HOXB13, HOXD13, HPN, ID4, IFNG, IGFBP5, IL6, KDM…	TRUE
GO:0072678	GO_BiologicalProcess-GOA_23.02.2017_10h01	T cell migration	[4, 6, 7, 8]	[Group094, Group127, Group150, Group154]	4	9.7561	1.94764e-05	0.0017334	{Group094=1.4395324297023587E-22, Group127=9.796760338000124E-17, Group150=6.47380039518465E-25, Group154=1.203528415039811E-23}	{Group094=1.813810861424972E-20, Group127=7.9353758737801E-15, Group150=8.998582549306663E-23, Group154=1.6006927920029487E-21}	[CCL2, CXCL10, CXCL11, PIK3CG]	[ADAM10, ADAM17, ADAM8, AIF1, AIRE, APOD, CCL2, CCL20, CCL21, CCL26, CCL3, CCL5, CCR2, CCR6, CLSTN1, CXCL10, CXCL11, CXCL12, CXCL13, CXCL16, CXCL9, CXCR3, ECM1, FADD, GPR15, GPR183, ITGA4, ITGB7, MYO1G, PIK3CD, PIK3CG, PYCARD, RIPK3, S100A7, S1PR1, TMEM102, TNFRSF14, TNFSF14, WNT5A, XCL1, ZAP70]	TRUE
GO:0030890	GO_BiologicalProcess-GOA_23.02.2017_10h01	positive regulation of B cell proliferation	[6, 7, 8, 9]	[Group106, Group134, Group161]	4	9.52381	2.14633e-05	0.00184584	{Group106=3.536637698216287E-14, Group134=5.416335777720201E-14, Group161=1.2972628010365007E-28}	{Group106=2.1219826189297723E-12, Group134=3.0331480355233125E-12, Group161=1.945894201554751E-26}	[BCL2, CD81, IL2, IL4]	[ADA, AMH, ATAD5, BCL2, BCL6, CARD11, CD38, CD40, CD74, CD81, CDKN1A, CHRNB2, CLCF1, GPR183, IL13, IL2, IL21, IL4, IL5, IL7, IRS2, MEF2C, MIF, NCKAP1L, NFATC2, PELI1, PTPRC, S100A8, S100A9, SASH3, SLC39A10, TCF3, TCF7L1, TFRC, TICAM1, TIRAP, TLR4, TNFRSF13C, TNFRSF4, TNFSF13B, VAV3, WNT3A]	TRUE
GO:0097284	GO_BiologicalProcess-GOA_23.02.2017_10h01	hepatocyte apoptotic process	[7]	[Group003]	3	18.75	3.09521e-05	0.00250712	{Group003=3.095208324636288E-5}	{Group003=1.238083329854515E-4}	[BCL2L1, PIK3CG, RB1]	[ARF6, BCL2L1, BID, CFLAR, DNMT3A, FAS, FASN, GSN, KRT18, KRT8, MTCH2, PIK3CG, RB1, STK24, STK3, STK4]	TRUE
GO:0019369	GO_BiologicalProcess-GOA_23.02.2017_10h01	arachidonic acid metabolic process	[5, 6, 7, 8, 9, 10]	[Group005]	4	7.14286	6.75888e-05	0.00446086	{Group005=5.435944221100363E-4}	{Group005=0.0010871888442200725}	[MAPK3, PLA2G4A, PTGS1, PTGS2]	[AKR1C3, ALOX12, ALOX12B, ALOX15, ALOX15B, ALOXE3, AWAT1, CBR1, CYP1A1, CYP1A2, CYP1B1, CYP2A13, CYP2A6, CYP2A7, CYP2B6, CYP2C18, CYP2C19, CYP2C8, CYP2C9, CYP2D6, CYP2D7, CYP2E1, CYP2F1, CYP2G1P, CYP2J2, CYP2S1, CYP2U1, CYP2W1, CYP4A11, CYP4F12, CYP4F2, DAGLA, DAGLB, EPHX2, FA2H, FAAH, FAAH2, FADS1, HPGDS, LOC107987479, MAPK3, MGLL, PLA2G10, PLA2G4A, PLA2G4B, PLA2G4C, PNPLA8, PTGDS, PTGES, PTGES2…	TRUE
GO:0051385	GO_BiologicalProcess-GOA_23.02.2017_10h01	response to mineralocorticoid	[6, 7]	[Group002]	3	8.82353	0.000314481	0.0106924	{Group002=3.144810050003145E-4}	{Group002=9.434430150009434E-4}	[CALM1, FOS, PARP1]	[AANAT, AIFM1, ATP2B1, AVPR1A, C03958, C16079, CALM1, CCND1, CDKN1A, CRH, CTGF, CYBA, CYBB, EDN1, FAM58A, FOS, FOSB, FOSL1, FOXO3, GPER1, GUCY2C, HTR1B, KRAS, MAOB, NEFL, NPAS4, NTRK3, PARP1, RAN, SRC, STAR, TH, TRH, UCN3]	TRUE
GO:0043550	GO_BiologicalProcess-GOA_23.02.2017_10h01	regulation of lipid kinase activity	[5, 6, 8, 9]	[Group000]	3	5.45455	0.00130019	0.0130019	{Group000=0.0013001945245238568}	{Group000=0.0013001945245238568}	[CD81, PIK3R1, RB1]	[AMBRA1, ATG14, CCKBR, CCL19, CCL21, CCR7, CD81, CDC42, DAB2IP, EEF1A2, EPHA8, ERBB4, F2, FGF13, FGF2, FGFR3, FGR, FLT1, FLT3, IRS1, KIT, KLF4, LYN, NOD2, NR4A3, NRBF2, PDGFB, PDGFRA, PDGFRB, PIK3IP1, PIK3R1, PIK3R2, PIK3R3, PIK3R4, PIK3R5, PIK3R6, PPP2R5A, PRKD1, PTK2, PTK2B, RAC1, RB1, RBL1, RBL2, RNASE1, RUBCN, SH3GLB1, SRC, TEK, TGFB1, TNFAIP8L3, VAC14, VAV2, VAV3, WASHC1]	TRUE
GO:0009617	GO_BiologicalProcess-GOA_23.02.2017_10h01	response to bacterium	[3, 5]	[Group101]	29	4.69256	1.87658e-24	6.79322e-22	{Group101=6.970265301625163E-27}	{Group101=1.0037182034340234E-24}	[CASP3, CASP8, CCL2, CD4, CDK4, CSF2, CXCL10, CXCL11, CXCL2, CXCL8, FOS, ICAM1, IFNG, IL10, IL1B, IL6, MAPK1, MAPK14, MAPK3, MAPK8, NFKB1, NOS2, NOS3, PRKCA, PRKCE, PTGS2, RELA, SERPINE1, TNF]	[ABCA1, ABCC2, ABCC8, ABL1, ABR, ACOD1, ADAM17, ADAM9, ADAMTS13, ADAMTS5, ADH5, ADH7, ADM, AICDA, AKAP8, AKIRIN2, AKT1, ALAD, ALPL, AMH, ANG, ANKRD1, ANKRD17, ANXA3, APOB, APP, ARG1, ATP4B, AXL, AZU1, B2M, BAIAP2, BAIAP2L1, BCL10, BCL3, BCR, BDKRB1, BMP6, BPI, BPIFA1, BPIFA2, BTF3P11, C10orf99, C16005, C16119, C18200, C18201, C4B, C5AR1, CACTIN, CALCA, CAMP, CARD9, CASP1, CASP3, CASP8, CASP9, CAV…	FALSE
GO:0010038	GO_BiologicalProcess-GOA_23.02.2017_10h01	response to metal ion	[4]	[Group155]	22	6.25	4.96673e-21	1.75822e-18	{Group155=1.5800558011000385E-30}	{Group155=2.4490864917050597E-28}	[BCL2, CALM1, CASP3, CASP8, CAT, CDK4, CREB1, EGFR, FOS, G6PD, HMOX1, ICAM1, IL1A, IL4, IL6, MAPK1, MAPK3, MAPK8, PARP1, PTGS1, PTGS2, SOD1]	[AANAT, ABAT, ABCB4, ABCC2, ABCC8, ACER1, ACO1, ACTA1, ACTG1, ADAM9, ADAMTS13, ADCY1, ADD1, AHCYL1, AKR1C3, AKT1, ALAD, ALG2, ALOX15, ALOX5AP, ANK3, ANXA11, ANXA7, AOC1, APBB1, APOBEC1, APP, AQP1, AQP2, AQP3, AQP9, ARG1, ARL13B, ASCL1, ASPH, ATAT1, ATF1, ATF4, ATP13A2, ATP5D, ATP7A, ATP7B, B2M, BAD, BCL2, BECN1, BGLAP, BMP6, BNIP3, BRAF, BSG, BTF3P11, C13055, C16051, C1QA, CA2, CACNA1G, CACNA1H, …	FALSE
GO:2001233	GO_BiologicalProcess-GOA_23.02.2017_10h01	regulation of apoptotic signaling pathway	[4, 5, 6, 7]	[Group136, Group155, Group160]	23	5.38642	1.5431e-20	5.43172e-18	{Group136=1.8509521382527809E-22, Group155=1.5800558011000385E-30, Group160=2.095925753462619E-36}	{Group136=2.313690172815976E-20, Group155=2.4490864917050597E-28, Group160=3.311562690470938E-34}	[BAX, BCL2, BCL2L1, CASP8, CSF2, HMOX1, HSPB1, ICAM1, IL1A, IL1B, IL4, IL6, MAPK8, MCL1, NOS3, PARP1, PTGS2, RELA, SERPINE1, SMAD3, SOD1, TNF, TP53]	[ACAA2, ACKR3, ACSL5, ACVR1, ADORA2A, AGAP2, AGT, AGTR2, AGXT, AKR1B1, AKT1, AMH, ANKRD2, APAF1, APOPT1, AR, AREG, ARHGEF2, ARRB2, ATAD5, ATF3, ATPIF1, AVP, BAD, BAG5, BAK1, BAX, BBC3, BCAP31, BCL10, BCL2, BCL2L1, BCL2L10, BCL2L11, BCL2L12, BCL2L14, BCLAF1, BDKRB1, BDKRB2, BID, BIK, BIRC6, BMF, BMP4, BMP5, BMPR1B, BNIP3, BOK, BRCA1, C13662, C18200, C19897, CASP2, CASP8, CAV1, CCAR2, CCM2, CD44, C…	FALSE
GO:2000379	GO_BiologicalProcess-GOA_23.02.2017_10h01	positive regulation of reactive oxygen species metabolic process	[4, 5, 6]	[Group123, Group161]	14	14.5833	8.89924e-19	3.08804e-16	{Group123=1.2336345804534712E-34, Group161=1.2972628010365007E-28}	{Group123=1.9368062913119498E-32, Group161=1.945894201554751E-26}	[ACE2, EGFR, GRB2, ICAM1, IFNG, IL1B, IL4, IL6, MAPK14, PTGS2, SMAD3, SOD1, TNF, TP53]	[ACE2, ACOD1, AGT, AGTR1, AGTR2, AGXT, AGXT2, AIF1, AKR1C3, AKT1, ASS1, CD36, CDKN1A, CLU, CRP, CSRP1, CYBA, DDAH1, DDAH2, DNM2, DUOXA1, EDN1, EGFR, EIF5AL1, ESR1, F2, F2RL1, FOXO3, GADD45A, GIPC1, GRB2, GSTP1, HBB, HDAC4, HSP90AA1, HSP90AB1, ICAM1, IFNG, IL1B, IL4, IL6, INS, INSR, ITGB2, JAK2, KLF2, KLF4, KLRK1, KRT89P, LEP, MAPK14, MAPT, MTOR, NFE2L2, NOS1AP, NOX4, NOX5, NQO2, OPRM1, P2RX4, PAR…	FALSE
GO:2001236	GO_BiologicalProcess-GOA_23.02.2017_10h01	regulation of extrinsic apoptotic signaling pathway	[5, 6, 7, 8]	[Group110, Group136, Group160, Group161]	16	8.79121	9.84042e-18	3.37526e-15	{Group110=1.095475490592073E-21, Group136=1.8509521382527809E-22, Group160=2.095925753462619E-36, Group161=1.2972628010365007E-28}	{Group110=1.3583896083341706E-19, Group136=2.313690172815976E-20, Group160=3.311562690470938E-34, Group161=1.945894201554751E-26}	[BAX, BCL2, BCL2L1, CASP8, CSF2, HMOX1, ICAM1, IL1A, IL1B, IL4, IL6, MCL1, NOS3, RELA, SERPINE1, TNF]	[ACSL5, ACVR1, AGAP2, AGT, AGTR2, AGXT, AKR1B1, AKT1, AR, AREG, ARHGEF2, ATF3, BAX, BCL10, BCL2, BCL2L1, BCL2L10, BCL2L14, BID, BIRC6, BMP4, BMP5, BMPR1B, BRCA1, C19897, CASP8, CAV1, CD8A, CFLAR, COL2A1, CSF2, CTNNA1, CTTN, CX3CL1, CYLD, DAPK1, DAPK3, DBH, DEDD2, DEPTOR, ETFA, ETFB, ETFDH, EYA1, EYA2, EYA3, EYA4, FADD, FAF1, FAIM2, FAS, FASLG, FASN, FEM1B, FGA, FGB, FGF10, FGFR1, FGG, FYN, G0S2, …	FALSE
GO:0002521	GO_BiologicalProcess-GOA_23.02.2017_10h01	leukocyte differentiation	[5, 6, 7, 8]	[Group161]	21	4.25101	1.20994e-16	4.11379e-14	{Group161=1.2972628010365007E-28}	{Group161=1.945894201554751E-26}	[BAX, BCL2, CASP8, CD4, CD40LG, CREB1, CSF2, FOS, IFNG, IL10, IL2, IL4, IL6, MAPK14, PARP1, PIK3R1, PPARG, PRKCA, RB1, SOD1, TNF]	[ABL1, ACIN1, ACKR2, ADA, ADAM17, ADAM8, ADGRG3, ADIPOQ, AGER, AICDA, AIRE, ANXA1, ANXA2, AP3B1, AP3D1, APCS, ARID4A, ATG5, ATM, ATP11C, ATP6AP1, ATP7A, AXL, AZI2, AZIN2, B2M, BAD, BAK1, BATF, BATF2, BATF3, BAX, BCL11B, BCL2, BCL3, BCL6, BGLAP, BLNK, BMP4, BMX, BRAF, BTK, C00870, C1QC, CA2, CALCA, CALCR, CAMK4, CARD11, CARTPT, CASP8, CBFA2T3, CBFB, CCL19, CCL3, CCR1, CCR6, CCR7, CCR9, CD101, CD10…	FALSE
GO:1901652	GO_BiologicalProcess-GOA_23.02.2017_10h01	response to peptide	[4, 5]	[Group059, Group101, Group144]	21	4.18327	1.67144e-16	5.64947e-14	{Group059=7.565770288482156E-24, Group101=6.970265301625163E-27, Group144=3.030093432374026E-28}	{Group059=1.013813218656609E-21, Group101=1.0037182034340234E-24, Group144=4.484538279913559E-26}	[CAT, CCL2, CDK4, CREB1, GRB2, ICAM1, IL10, IL1B, IL6, MAPK1, MAPK14, MAPK3, NFKB1, PARP1, PIK3R1, PPARG, PRKCA, PRKCB, RELA, STAT1, TP53]	[AANAT, ABCB4, ABCC8, ACOD1, ACTN2, ACVR1C, ADCY1, ADCY2, ADCY3, ADCY4, ADCY5, ADCY6, ADCY7, ADCY8, ADCY9, ADIPOQ, ADIPOR1, ADM, AGRP, AGT, AGTR1, AGTR2, AGTRAP, AGXT, AHCYL1, AHSG, AKR1B1, AKT1, AKT2, ANXA1, AP3S1, APC, APEX1, APOBEC1, APPL1, APRT, AREG, ARG1, ARHGEF2, ATP6AP1, ATP6V0A1, ATP6V0A2, ATP6V0A4, ATP6V0B, ATP6V0C, ATP6V0D1, ATP6V0D2, ATP6V0E1, ATP6V0E2, ATP6V1A, ATP6V1B1, ATP6V1B2, AT…	FALSE
GO:0042110	GO_BiologicalProcess-GOA_23.02.2017_10h01	T cell activation	[4, 6]	[Group160, Group161]	20	4.12371	1.32991e-15	4.42861e-13	{Group160=2.095925753462619E-36, Group161=1.2972628010365007E-28}	{Group160=3.311562690470938E-34, Group161=1.945894201554751E-26}	[BAX, BCL2, CASP3, CASP8, CCL2, CD4, CD40LG, DPP4, GRB2, ICAM1, IFNG, IL10, IL1B, IL2, IL4, IL6, PIK3CG, PIK3R1, SMAD3, SOD1]	[ABL1, ACKR2, ADA, ADAM17, ADAM8, ADORA2A, AGER, AIF1, AIRE, AKT1, ANXA1, AP3B1, AP3D1, APBB1IP, ARHGEF7, ATG5, ATP7A, AZI2, AZIN2, B2M, BAD, BATF, BAX, BCL10, BCL11B, BCL2, BCL3, BCL6, BMP4, BMX, BRAF, BTLA, BTN2A2, BTN3A1, BTNL2, C00870, C18200, C21orf33, CAMK4, CARD11, CASP3, CASP8, CAV1, CCDC88B, CCL19, CCL2, CCL21, CCL5, CCND3, CCR2, CCR6, CCR7, CCR9, CD151, CD1C, CD1D, CD2, CD209, CD24, CD2…	FALSE
GO:0002573	GO_BiologicalProcess-GOA_23.02.2017_10h01	myeloid leukocyte differentiation	[6, 7, 8, 9]	[Group161]	14	6.89655	3.98077e-14	1.29375e-11	{Group161=1.2972628010365007E-28}	{Group161=1.945894201554751E-26}	[CASP8, CD4, CREB1, CSF2, FOS, IFNG, IL4, MAPK14, PARP1, PIK3R1, PPARG, PRKCA, RB1, TNF]	[ACIN1, ADIPOQ, ANXA2, APCS, ARID4A, ATP6AP1, BATF, BATF2, BATF3, BGLAP, BMP4, C1QC, CA2, CALCA, CALCR, CAMK4, CARTPT, CASP8, CBFA2T3, CCL19, CCL3, CCR1, CCR7, CD101, CD109, CD4, CD74, CD86, CDC42, CDK6, CEACAM1, CEBPA, CEBPB, CEBPE, CLDN18, CLSTN1, CREB1, CSF1, CSF1R, CSF2, CSF3, CTNNB1, CTNNBIP1, CUL4A, DCSTAMP, DHRS2, EFNA2, EIF2AK1, EIF2AK2, EPHA2, ESRRA, F2RL1, FADD, FAM20C, FAM213A, FARP2, …	FALSE
GO:0008625	GO_BiologicalProcess-GOA_23.02.2017_10h01	extrinsic apoptotic signaling pathway via death domain receptors	[5, 6, 7, 8]	[Group160, Group161]	11	11.828	6.70275e-14	2.15828e-11	{Group160=2.095925753462619E-36, Group161=1.2972628010365007E-28}	{Group160=3.311562690470938E-34, Group161=1.945894201554751E-26}	[BAX, BCL2, BCL2L1, CASP8, HMOX1, ICAM1, IL6, NOS3, PIK3R1, SERPINE1, TNF]	[ARHGEF2, ATF3, BAD, BAG3, BAX, BCL2, BCL2L1, BEX3, BID, BLOC1S2, BMP5, BMPR1B, BRCA1, CASP8, CASP8AP2, CD8A, CFLAR, CRADD, DAB2IP, DAPK1, DAXX, DDX3X, DDX47, DEDD, DEDD2, DIABLO, ETFA, ETFB, ETFDH, FADD, FAF1, FAIM2, FAS, FASLG, FASN, FEM1B, FGA, FGB, FGG, GABARAP, GPX1, HGF, HMGB2, HMOX1, ICAM1, IL6, KIAA0141, LGALS3, MADD, MAL, MKL1, MOAP1, NANOS3, NF1, NGF, NOS3, PARK7, PEA15, PIDD1, PIK3R1, …	FALSE
GO:0060326	GO_BiologicalProcess-GOA_23.02.2017_10h01	cell chemotaxis	[4, 5, 6]	[Group080, Group157, Group161]	15	5.35714	1.821e-13	5.73616e-11	{Group080=2.1232905665321592E-17, Group157=6.014358351570216E-37, Group161=1.2972628010365007E-28}	{Group080=1.8684956985483E-15, Group157=9.562829778996643E-35, Group161=1.945894201554751E-26}	[CCL2, CXCL10, CXCL11, CXCL2, CXCL8, HSPB1, IFNG, IL10, IL1B, IL4, IL6, MAPK14, MAPK3, PIK3CG, SERPINE1]	[ADAM10, ADAM17, ADAM8, ADGRE2, AGTR1, AIF1, ANO6, ANXA1, ARHGEF16, ARHGEF5, ARRB2, AZU1, BCAR1, BIN2, BST1, BUD31, C1QBP, C3AR1, C5, C5AR1, C5AR2, CALCA, CALR, CAMK1D, CCL1, CCL11, CCL13, CCL14, CCL15, CCL15-CCL14, CCL16, CCL17, CCL18, CCL19, CCL2, CCL20, CCL21, CCL22, CCL23, CCL24, CCL25, CCL26, CCL27, CCL28, CCL3, CCL3L1, CCL4, CCL4L1, CCL4L2, CCL5, CCL7, CCL8, CCR1, CCR2, CCR5, CCR6, CCR7, CD…	FALSE
GO:0046822	GO_BiologicalProcess-GOA_23.02.2017_10h01	regulation of nucleocytoplasmic transport	[5, 6, 7]	[Group161]	14	6.08696	2.23202e-13	7.00854e-11	{Group161=1.2972628010365007E-28}	{Group161=1.945894201554751E-26}	[EGFR, IFNG, IL10, IL1B, IL6, MAPK1, MAPK14, PARP1, PIK3R1, PRKCA, PTGS2, SMAD3, TNF, TP53]	[AAAS, AGTR2, AKAP6, AKAP8L, ANAPC2, ANGPT1, ANP32B, APC2, APOD, AXIN2, BAG3, BAMBI, BARD1, BCL3, BMP4, BMP6, BMP7, BMPR1A, C1QTNF3, C8orf4, CABP1, CAMK1, CCDC22, CCL19, CD27, CD36, CDH1, CDK1, CDK5, CDKN1A, CDKN2A, CHERP, CHORDC1, CHP1, CHP2, CREB3, CREB3L4, CSF3, CTDSPL2, CYLD, DAB2, DAB2IP, DACT1, DACT3, DDX58, DMAP1, DNAJC27, DYRK2, ECT2, EDA, EDAR, EGF, EGFR, EMD, ERBB4, FAF1, FAM89B, FBXW11…	FALSE
GO:0050921	GO_BiologicalProcess-GOA_23.02.2017_10h01	positive regulation of chemotaxis	[3, 4, 5, 6]	[Group150, Group157]	12	8.51064	2.50423e-13	7.83822e-11	{Group150=6.47380039518465E-25, Group157=6.014358351570216E-37}	{Group150=8.998582549306663E-23, Group157=9.562829778996643E-35}	[CCL2, CXCL10, CXCL11, CXCL2, CXCL8, HSPB1, IL4, IL6, MAPK14, MAPK3, SERPINE1, SMAD3]	[ADAM10, ADAM17, AGER, AIF1, ANO6, ARTN, AZU1, BMPR2, BUD31, C1QBP, C3AR1, C5AR1, CALR, CAMK1D, CASR, CCL1, CCL19, CCL2, CCL21, CCL26, CCL3, CCL4, CCL5, CCL7, CCR1, CCR2, CCR4, CCR6, CCR7, CD74, CDH13, CMKLR1, CNOT6, CNTN1, CREB3, CREB3L4, CSF1, CXCL1, CXCL10, CXCL11, CXCL12, CXCL13, CXCL14, CXCL17, CXCL2, CXCL3, CXCL5, CXCL6, CXCL8, CXCL9, CXCR3, DAPK2, DSCAM, EDN1, EDN2, EDN3, EHHADH, F2RL1, F3…	FALSE
GO:0030099	GO_BiologicalProcess-GOA_23.02.2017_10h01	myeloid cell differentiation	[5, 6, 7, 8]	[Group161]	16	4.61095	2.59995e-13	8.11184e-11	{Group161=1.2972628010365007E-28}	{Group161=1.945894201554751E-26}	[CASP3, CASP8, CD4, CREB1, CSF2, FOS, G6PD, IFNG, IL4, MAPK14, PARP1, PIK3R1, PPARG, PRKCA, RB1, TNF]	[ABI1, ACIN1, ACTN1, ACVR1B, ACVR2A, ADAR, ADD1, ADIPOQ, AHSP, ALAS2, ANKRD54, ANXA2, APCS, ARID4A, ARNT, ATP6AP1, ATPIF1, B2M, BATF, BATF2, BATF3, BCL6, BGLAP, BMP4, C18200, C19313, C1QC, CA2, CALCA, CALCR, CAMK4, CARTPT, CASP3, CASP8, CASP9, CBFA2T3, CBFB, CCL19, CCL3, CCR1, CCR7, CD101, CD109, CD4, CD74, CD86, CDC42, CDC73, CDK6, CDKN1C, CDKN2B, CEACAM1, CEBPA, CEBPB, CEBPE, CEBPG, CIB1, CLDN1…	FALSE
GO:0097529	GO_BiologicalProcess-GOA_23.02.2017_10h01	myeloid leukocyte migration	[3, 5, 6, 7]	[Group051, Group080, Group150, Group157, Group161]	13	6.95187	3.19428e-13	9.90228e-11	{Group051=6.726258273302631E-25, Group080=2.1232905665321592E-17, Group150=6.47380039518465E-25, Group157=6.014358351570216E-37, Group161=1.2972628010365007E-28}	{Group051=9.28223641715763E-23, Group080=1.8684956985483E-15, Group150=8.998582549306663E-23, Group157=9.562829778996643E-35, Group161=1.945894201554751E-26}	[CCL2, CXCL10, CXCL2, CXCL8, IFNG, IL1A, IL1B, IL4, IL6, MAPK14, MAPK3, PIK3CG, SERPINE1]	[ADAM8, ADGRE2, AIF1, ANO6, ANXA1, ARHGEF5, AZU1, BST1, C1QBP, C3AR1, C5, C5AR1, C5AR2, CALCA, CAMK1D, CCL1, CCL11, CCL13, CCL14, CCL15, CCL15-CCL14, CCL16, CCL17, CCL18, CCL19, CCL2, CCL20, CCL21, CCL22, CCL23, CCL24, CCL25, CCL26, CCL3, CCL3L1, CCL4, CCL4L1, CCL5, CCL7, CCL8, CCR1, CCR2, CCR7, CD300A, CD74, CHGA, CKLF, CLSTN1, CMKLR1, CREB3, CREB3L4, CSF1, CSF3R, CX3CL1, CXADR, CXCL1, CXCL10, C…	FALSE
GO:0022407	GO_BiologicalProcess-GOA_23.02.2017_10h01	regulation of cell-cell adhesion	[3, 4, 5]	[Group161]	17	4.00943	4.03028e-13	1.2373e-10	{Group161=1.2972628010365007E-28}	{Group161=1.945894201554751E-26}	[CASP3, CCL2, CD4, CD40LG, DPP4, GRB2, ICAM1, IFNG, IL10, IL1B, IL2, IL4, IL6, PIK3R1, PRKCA, SOD1, TNF]	[ABAT, ABL1, ADA, ADAM8, ADAMTS18, ADIPOQ, ADORA2A, AGER, AIF1, AKT1, ALOX12, ALOX15, ANK3, ANXA1, AP3B1, AP3D1, APOA1, ARHGEF7, ASS1, B4GALNT2, BAD, BCL10, BCL6, BMP4, BMP7, BRAF, BTLA, BTN2A2, BTNL2, C00870, C18200, C1QTNF1, C21orf33, CAMK4, CARD11, CASP3, CAV1, CCDC88B, CCL19, CCL2, CCL21, CCL25, CCL28, CCL5, CCM2L, CCR2, CCR7, CD1D, CD2, CD209, CD24, CD244, CD247, CD27, CD274, CD276, CD28, CD…	FALSE
GO:1901653	GO_BiologicalProcess-GOA_23.02.2017_10h01	cellular response to peptide	[5, 6]	[Group143, Group144]	16	4.48179	4.02045e-13	1.2383e-10	{Group143=1.0304610897274216E-26, Group144=3.030093432374026E-28}	{Group143=1.4735593583102129E-24, Group144=4.484538279913559E-26}	[CCL2, CDK4, CREB1, GRB2, IL1B, IL6, MAPK1, MAPK3, NFKB1, PARP1, PIK3R1, PPARG, PRKCA, PRKCB, RELA, TP53]	[ACTN2, ADCY1, ADCY2, ADCY3, ADCY4, ADCY5, ADCY6, ADCY7, ADCY8, ADCY9, ADIPOQ, ADIPOR1, AGT, AGTR1, AGTR2, AGTRAP, AGXT, AHCYL1, AHSG, AKR1B1, AKT1, AKT2, AP3S1, APC, APEX1, APOBEC1, APPL1, APRT, ARG1, ARHGEF2, ATP6AP1, ATP6V0A1, ATP6V0A2, ATP6V0A4, ATP6V0B, ATP6V0C, ATP6V0D1, ATP6V0D2, ATP6V0E1, ATP6V0E2, ATP6V1A, ATP6V1B1, ATP6V1B2, ATP6V1C1, ATP6V1C2, ATP6V1D, ATP6V1E1, ATP6V1E2, ATP6V1F, ATP6…	FALSE
GO:0045785	GO_BiologicalProcess-GOA_23.02.2017_10h01	positive regulation of cell adhesion	[2, 3, 4]	[Group161]	17	4	4.18634e-13	1.28102e-10	{Group161=1.2972628010365007E-28}	{Group161=1.945894201554751E-26}	[CCL2, CD4, CD40LG, DPP4, GRB2, ICAM1, IFNG, IL10, IL1B, IL2, IL4, IL6, PIK3R1, PRKCA, PRKCE, SMAD3, TNF]	[ABI3BP, ADA, ADAM8, ADAM9, ADGRG1, AGER, AGR2, AIF1, AKT1, ALOX12, ALOX15, ANGPT1, ANK3, ANXA1, AP3B1, AP3D1, APBB1IP, APOA1, ARHGEF7, ARL2, ARPC2, AZU1, BAD, BAG4, BCL10, BMP7, BRAF, BTLA, BTNL2, C00870, C18200, C1QBP, C21orf33, CALR, CARD11, CARMIL1, CAV1, CCDC80, CCDC88B, CCL19, CCL2, CCL21, CCL25, CCL28, CCL5, CCR2, CCR7, CD1D, CD24, CD244, CD247, CD27, CD274, CD276, CD28, CD36, CD3D, CD3E, …	FALSE
GO:0032388	GO_BiologicalProcess-GOA_23.02.2017_10h01	positive regulation of intracellular transport	[3, 4, 5, 6]	[Group157, Group161]	15	4.61538	1.57685e-12	4.73056e-10	{Group157=6.014358351570216E-37, Group161=1.2972628010365007E-28}	{Group157=9.562829778996643E-35, Group161=1.945894201554751E-26}	[CCL2, EGFR, IFNG, IL1B, IL4, IL6, MAPK1, MAPK14, PARP1, PIK3R1, PRKCA, PTGS2, SMAD3, TNF, TP53]	[ABLIM3, ACSM6, ACTL6A, ADORA2B, AKAP6, AKT2, ANK3, ANP32B, ANXA2, ARF1, ARF1P1, ARIH2, ASPH, ATG13, B3GAT3, BAG3, BAMBI, BAP1, BCAP31, BCAS3, BMP4, BMP6, BMPR1A, C21orf33, C2CD5, C8orf4, CACNA1A, CAMK1, CAPN10, CCL19, CCL2, CD27, CDC42, CDH1, CDH15, CDH3, CDK1, CDK5, CDK5R1, CDKL2, CEMIP, CEP131, CEP290, CHERP, CHORDC1, CHP1, CHP2, CHRM1, CIB1, CREBRF, CSF3, CSNK2A2, CTDSP2, CTDSPL2, CTSK, CYB5R…	FALSE
GO:0022409	GO_BiologicalProcess-GOA_23.02.2017_10h01	positive regulation of cell-cell adhesion	[3, 4, 5, 6]	[Group064, Group157, Group161]	14	5.18518	1.99082e-12	5.93265e-10	{Group064=1.2494360185450583E-22, Group157=6.014358351570216E-37, Group161=1.2972628010365007E-28}	{Group064=1.586783743552224E-20, Group157=9.562829778996643E-35, Group161=1.945894201554751E-26}	[CCL2, CD4, CD40LG, DPP4, GRB2, ICAM1, IFNG, IL10, IL1B, IL2, IL4, IL6, PIK3R1, TNF]	[ADA, ADAM8, AGER, AIF1, AKT1, ALOX15, ANK3, ANXA1, AP3B1, AP3D1, ARHGEF7, BAD, BCL10, BMP7, BTLA, BTNL2, C00870, C18200, C21orf33, CARD11, CAV1, CCDC88B, CCL19, CCL2, CCL21, CCL5, CCR2, CCR7, CD1D, CD24, CD244, CD247, CD27, CD274, CD276, CD28, CD3D, CD3E, CD3G, CD4, CD40LG, CD44, CD46, CD47, CD5, CD55, CD59, CD6, CD74, CD80, CD83, CD86, CDC42, CITED2, CORO1A, CSK, CTLA4, CXCL13, CYLD, DEAF1, DEN…	FALSE
GO:1903706	GO_BiologicalProcess-GOA_23.02.2017_10h01	regulation of hemopoiesis	[3, 4, 5, 6, 7, 8]	[Group161]	15	4.51807	2.14205e-12	6.31906e-10	{Group161=1.2972628010365007E-28}	{Group161=1.945894201554751E-26}	[ACE, CASP8, CD4, CREB1, FOS, IFNG, IL2, IL4, IL6, MAPK14, PIK3R1, PRKCA, RB1, SOD1, TNF]	[ACE, ACIN1, ACVR1B, ACVR2A, ADA, ADAM8, ADIPOQ, AGER, ANKLE1, ANKRD54, ANXA1, AP3B1, AP3D1, APCS, ARID4A, ARNT, ATP11C, ATP6AP1, ATXN1L, AXL, B2M, BAD, BCL6, BGLAP, BMP4, BRAF, BTK, C00870, C1QC, C21orf33, C8orf4, CA2, CALCA, CAMK4, CARD11, CARTPT, CASP8, CCL19, CCL3, CCR1, CD101, CD2, CD27, CD28, CD4, CD46, CD74, CD80, CD83, CD86, CDC73, CDK6, CDKN2A, CEACAM1, CEBPB, CIB1, CLDN18, CLPTM1, CREB1…	FALSE
GO:0032943	GO_BiologicalProcess-GOA_23.02.2017_10h01	mononuclear cell proliferation	[4]	[Group161]	14	5.03597	2.95608e-12	8.6613e-10	{Group161=1.2972628010365007E-28}	{Group161=1.945894201554751E-26}	[ACE, BAX, BCL2, CASP3, CD4, CD40LG, CD81, IFNG, IL10, IL1B, IL2, IL4, IL6, PIK3CG]	[ABL1, ACE, ADA, AGER, AHR, AIF1, AMH, ANXA1, ATAD5, ATM, AZI2, AZIN2, BAX, BCL2, BCL6, BMP4, BTK, BTN2A2, BTN3A1, BTNL2, C00870, C18200, C21orf33, CARD11, CASP3, CCDC88B, CCL19, CCL5, CCND3, CCR2, CD151, CD180, CD1D, CD209, CD24, CD244, CD274, CD276, CD28, CD300A, CD38, CD3E, CD4, CD40, CD40LG, CD46, CD55, CD59, CD6, CD74, CD79A, CD80, CD81, CD86, CDKN1A, CDKN2A, CEBPB, CHRNB2, CLC, CLCF1, CLEC4…	FALSE
GO:1902105	GO_BiologicalProcess-GOA_23.02.2017_10h01	regulation of leukocyte differentiation	[4, 5, 6, 7, 8, 9]	[Group130, Group161]	13	5.13834	1.49648e-11	4.26496e-09	{Group130=8.72359720625284E-19, Group161=1.2972628010365007E-28}	{Group130=8.549125262127783E-17, Group161=1.945894201554751E-26}	[CASP8, CD4, CREB1, FOS, IFNG, IL2, IL4, IL6, PIK3R1, PRKCA, RB1, SOD1, TNF]	[ACIN1, ADA, ADAM8, ADIPOQ, AGER, ANXA1, AP3B1, AP3D1, APCS, ARID4A, ATP11C, ATP6AP1, AXL, BAD, BCL6, BGLAP, BMP4, BRAF, BTK, C00870, C1QC, CA2, CALCA, CAMK4, CARD11, CARTPT, CASP8, CCL19, CCL3, CCR1, CD101, CD2, CD27, CD28, CD4, CD46, CD74, CD80, CD83, CD86, CDK6, CDKN2A, CEACAM1, CEBPB, CLDN18, CLPTM1, CREB1, CSF1, CTLA4, CTNNB1, CTNNBIP1, CUL4A, CYLD, CYP26B1, DCSTAMP, DROSHA, DTX1, EGR3, ERBB…	FALSE
GO:2001239	GO_BiologicalProcess-GOA_23.02.2017_10h01	regulation of extrinsic apoptotic signaling pathway in absence of ligand	[5, 6, 7, 8, 9]	[Group111, Group136, Group160, Group161]	8	15.6863	2.00407e-11	5.67152e-09	{Group111=1.595395626325167E-17, Group136=1.8509521382527809E-22, Group160=2.095925753462619E-36, Group161=1.2972628010365007E-28}	{Group111=1.4358560636926502E-15, Group136=2.313690172815976E-20, Group160=3.311562690470938E-34, Group161=1.945894201554751E-26}	[BAX, BCL2, BCL2L1, CSF2, IL1A, IL1B, MCL1, TNF]	[AGAP2, AKT1, BAX, BCL2, BCL2L1, BCL2L10, COL2A1, CSF2, CTNNA1, CX3CL1, DAPK3, EYA1, EYA2, EYA3, EYA4, FAS, FASN, FGF10, FGFR1, FYN, GATA1, GDNF, GFRAL, HSPA1A, HSPA1B, HTRA2, IFI6, IL1A, IL1B, IL7, INHBA, MAP2K5, MAPK7, MCL1, NF1, NRG1, PF4, PPP1CA, PPP2R1A, PPP2R1B, RET, RIPK1, SNAI2, SRPX, STRADB, TERT, TGFB2, TNF, UNC5B, WWOX, ZC3HC1]	FALSE
GO:0050863	GO_BiologicalProcess-GOA_23.02.2017_10h01	regulation of T cell activation	[5, 6, 7]	[Group064, Group161]	14	4.24242	2.95088e-11	8.23295e-09	{Group064=1.2494360185450583E-22, Group161=1.2972628010365007E-28}	{Group064=1.586783743552224E-20, Group161=1.945894201554751E-26}	[CASP3, CCL2, CD4, CD40LG, DPP4, GRB2, IFNG, IL10, IL1B, IL2, IL4, IL6, PIK3R1, SOD1]	[ADA, ADAM8, ADORA2A, AGER, AIF1, AKT1, ANXA1, AP3B1, AP3D1, ARHGEF7, BAD, BCL10, BCL6, BMP4, BRAF, BTLA, BTN2A2, BTNL2, C00870, C18200, C21orf33, CAMK4, CARD11, CASP3, CAV1, CCDC88B, CCL19, CCL2, CCL21, CCL5, CCR2, CCR7, CD1D, CD2, CD209, CD24, CD244, CD247, CD27, CD274, CD276, CD28, CD300A, CD3D, CD3E, CD3G, CD4, CD40LG, CD46, CD47, CD5, CD55, CD59, CD6, CD74, CD80, CD83, CD86, CDC42, CDKN2A, C…	FALSE
GO:0032868	GO_BiologicalProcess-GOA_23.02.2017_10h01	response to insulin	[5, 6, 7]	[Group089, Group116, Group132, Group144, Group159]	13	4.67626	4.86664e-11	1.34319e-08	{Group089=2.0657438308566865E-17, Group116=2.07901236730568E-29, Group132=1.6327869166520973E-27, Group144=3.030093432374026E-28, Group159=2.3614833448420293E-33}	{Group089=1.838512009462451E-15, Group116=3.1393086746315765E-27, Group132=2.383868898312062E-25, Group144=4.484538279913559E-26, Group159=3.6839140179535657E-31}	[CAT, CCL2, CDK4, GRB2, ICAM1, IL10, IL1B, IL6, PARP1, PIK3R1, PPARG, PRKCB, RELA]	[AANAT, ABCC8, ACOD1, ACVR1C, ADIPOQ, ADIPOR1, ADM, AGRP, AGT, AGXT, AHSG, AKT1, AKT2, AP3S1, APC, APOBEC1, APPL1, APRT, ATP6AP1, ATP6V0A1, ATP6V0A2, ATP6V0A4, ATP6V0B, ATP6V0C, ATP6V0D1, ATP6V0D2, ATP6V0E1, ATP6V0E2, ATP6V1A, ATP6V1B1, ATP6V1B2, ATP6V1C1, ATP6V1C2, ATP6V1D, ATP6V1E1, ATP6V1E2, ATP6V1F, ATP6V1G1, ATP6V1G2, ATP6V1G3, ATP6V1H, BAIAP2, BAIAP2L1, BAIAP2L2, BCAR1, C13055, C16542, C1QT…	FALSE
GO:0042113	GO_BiologicalProcess-GOA_23.02.2017_10h01	B cell activation	[4, 6]	[Group161]	13	4.51389	7.55413e-11	2.04717e-08	{Group161=1.2972628010365007E-28}	{Group161=1.945894201554751E-26}	[BAX, BCL2, CASP3, CASP8, CD40LG, CD81, IFNG, IL10, IL2, IL4, IL6, PIK3R1, PRKCB]	[ABL1, ADA, ADAM17, ADGRG3, AHR, AICDA, AKAP17A, AMH, APLF, ARTN, ATAD5, ATM, ATP11C, BAD, BAK1, BANK1, BATF, BAX, BCL2, BCL3, BCL6, BLNK, BST2, BTK, CARD11, CASP3, CASP8, CCR6, CD180, CD27, CD28, CD300A, CD38, CD40, CD40LG, CD74, CD79A, CD79B, CD81, CD86, CDH17, CDKN1A, CDKN2A, CEBPG, CHRNA4, CHRNB2, CLCF1, CLSTN1, CMTM7, CR2, CTLA4, CTPS1, CXCR5, CYLD, DCAF1, DCLRE1C, DLL1, DOCK10, DOCK11, EP30…	FALSE
GO:0097530	GO_BiologicalProcess-GOA_23.02.2017_10h01	granulocyte migration	[4, 6, 7, 8]	[Group080, Group091, Group157, Group161]	10	7.57576	9.07341e-11	2.44075e-08	{Group080=2.1232905665321592E-17, Group091=1.9643660437894692E-20, Group157=6.014358351570216E-37, Group161=1.2972628010365007E-28}	{Group080=1.8684956985483E-15, Group091=2.3179519316715738E-18, Group157=9.562829778996643E-35, Group161=1.945894201554751E-26}	[CCL2, CXCL2, CXCL8, IFNG, IL1A, IL1B, IL4, MAPK14, MAPK3, PIK3CG]	[ADAM8, ADGRE2, ANXA1, BST1, C1QBP, C3AR1, C5AR1, C5AR2, CAMK1D, CCL1, CCL11, CCL13, CCL14, CCL15, CCL15-CCL14, CCL16, CCL17, CCL18, CCL19, CCL2, CCL20, CCL21, CCL22, CCL23, CCL24, CCL25, CCL26, CCL3, CCL3L1, CCL4, CCL4L1, CCL5, CCL7, CCL8, CCR7, CD300A, CD74, CKLF, CLSTN1, CMKLR1, CSF1, CSF3R, CX3CL1, CXADR, CXCL1, CXCL17, CXCL2, CXCL3, CXCL5, CXCL6, CXCL8, CXCR2, DAPK2, DHX34, DHX8, EDN1, EDN2,…	FALSE
GO:0030260	GO_BiologicalProcess-GOA_23.02.2017_10h01	entry into host cell	[6, 7]	[Group022]	10	7.35294	1.22094e-10	3.24769e-08	{Group022=1.0673875035391895E-13}	{Group022=5.336937517695947E-12}	[ACE2, ANPEP, CD4, CD81, CTSB, CXCL8, DPP4, GRB2, ICAM1, PPIA]	[ACE2, ANPEP, APCS, AXL, CAV1, CAV2, CBL, CBLL1, CCR5, CD209, CD4, CD46, CD55, CD74, CD80, CD81, CD86, CDH1, CDHR3, CLDN1, CLEC4G, CLEC4M, CLEC5A, CR1, CR2, CTNNB1, CTNND1, CTSB, CXADR, CXCL8, CXCR4, DAG1, DPP4, DYNLT1, EFNB2, EFNB3, EPS15, EXOC2, EXOC7, F11R, FCN1, FCN3, FUCA2, FZR1, GAS6, GRB2, GRK2, GSN, GYPA, HAVCR1, HLA-DRB1, HS3ST5, HS3ST6, HSBP1L1, HSPA1A, HSPA1B, HTR2A, HYAL2, ICAM1, IDE,…	FALSE
GO:0042098	GO_BiologicalProcess-GOA_23.02.2017_10h01	T cell proliferation	[5, 6, 7]	[Group161]	11	5.88235	1.50168e-10	3.97945e-08	{Group161=1.2972628010365007E-28}	{Group161=1.945894201554751E-26}	[BAX, CASP3, CD4, CD40LG, IFNG, IL10, IL1B, IL2, IL4, IL6, PIK3CG]	[ABL1, AGER, AIF1, ANXA1, BAX, BMP4, BTN2A2, BTN3A1, BTNL2, C00870, C18200, C21orf33, CARD11, CASP3, CCDC88B, CCL19, CCL5, CCND3, CCR2, CD151, CD1D, CD209, CD24, CD244, CD274, CD276, CD28, CD3E, CD4, CD40LG, CD46, CD55, CD59, CD6, CD80, CD86, CDKN2A, CEBPB, CLC, CLCF1, CLEC4G, CORO1A, CTLA4, CTNNB1, CTPS1, DEAF1, DHPS, DLG1, DNAJA3, DOCK2, DOCK8, EBI3, EFNB1, ELF4, EPHB6, EPO, EPX, ERBB2, FADD, F…	FALSE
GO:0050714	GO_BiologicalProcess-GOA_23.02.2017_10h01	positive regulation of protein secretion	[4, 5, 6, 7, 8, 9, 10]	[Group118, Group157, Group161]	12	4.93827	1.55454e-10	4.10399e-08	{Group118=4.905106245059882E-26, Group157=6.014358351570216E-37, Group161=1.2972628010365007E-28}	{Group118=6.916199805534434E-24, Group157=9.562829778996643E-35, Group161=1.945894201554751E-26}	[EGFR, IFNG, IL10, IL1A, IL1B, IL2, IL6, MAPK14, MAPK3, PPIA, PRKCE, TNF]	[AACS, ABAT, ABL1, ACHE, ADAM8, ADAM9, ADORA2A, AGTR2, AIM2, ALOX15B, AMH, ANG, ANKRD1, ANO1, APBB1, ARF1, ARF1P1, ARRB1, ATP13A2, BAD, BLK, BMP6, BTNL2, C03958, C15906, C16079, C1QTNF1, C1QTNF12, C1QTNF3, C2CD2L, C5, CADM1, CAMP, CAPN10, CARD8, CASP1, CASP5, CASR, CCL19, CCL3, CD14, CD2, CD244, CD274, CD34, CD38, CD58, CFTR, CHAMP1, CHIA, CHUK, CLEC4E, CLEC5A, CLEC6A, CLEC9A, CLU, CRH, CRTAM, CS…	FALSE
GO:0050730	GO_BiologicalProcess-GOA_23.02.2017_10h01	regulation of peptidyl-tyrosine phosphorylation	[7, 8, 9, 10]	[Group161]	12	4.93827	1.55454e-10	4.10399e-08	{Group161=1.2972628010365007E-28}	{Group161=1.945894201554751E-26}	[ACE, CD4, CD81, CSF2, EGFR, ICAM1, IFNG, IL2, IL4, IL6, PRKCE, TP53]	[ABI1, ABI2, ABL1, ACE, ADAM17, ADIPOQ, ADNP, ADORA1, ADRA2A, ADRA2B, ADRA2C, AFAP1L2, AGT, AGXT, ALKAL1, ALKAL2, AMH, ANGPT1, ANGPT4, APP, AREG, ARHGEF2, ARL2BP, ARRB2, BST1, C18200, C21orf33, CAV1, CBL, CBLB, CBLC, CCK, CCL5, CCM2, CD24, CD300A, CD36, CD3E, CD4, CD40, CD44, CD74, CD80, CD81, CLCF1, CNTF, CNTN1, CRLF1, CSF1R, CSF2, CSF3, CSPG4, CTF1, DGKQ, DMTN, DOK7, DVL2, EFNA1, EFNA5, EGF, EG…	FALSE
GO:0045637	GO_BiologicalProcess-GOA_23.02.2017_10h01	regulation of myeloid cell differentiation	[4, 5, 6, 7, 8, 9]	[Group130, Group161]	11	5.85106	1.59018e-10	4.18217e-08	{Group130=8.72359720625284E-19, Group161=1.2972628010365007E-28}	{Group130=8.549125262127783E-17, Group161=1.945894201554751E-26}	[CASP8, CD4, CREB1, FOS, IFNG, IL4, MAPK14, PIK3R1, PRKCA, RB1, TNF]	[ACIN1, ACVR1B, ACVR2A, ADIPOQ, ANKRD54, APCS, ARID4A, ARNT, ATP6AP1, B2M, BGLAP, C1QC, CA2, CALCA, CAMK4, CARTPT, CASP8, CCL3, CCR1, CD101, CD4, CD74, CDC73, CDK6, CEACAM1, CEBPB, CIB1, CLDN18, CREB1, CSF1, CSF3, CSF3R, CTNNB1, CTNNBIP1, CTR9, CUL4A, DCSTAMP, DLL1, EIF6, ESRRA, ETS1, FADD, FAM213A, FAS, FASN, FBN1, FES, FOS, FOXO3, FOXP1, FSHB, FSHR, FSTL3, GABPA, GAS2L1, GATA1, GATA2, GNAS, GPR…	FALSE
GO:1902042	GO_BiologicalProcess-GOA_23.02.2017_10h01	negative regulation of extrinsic apoptotic signaling pathway via death domain receptors	[6, 7, 8, 9, 10]	[Group160, Group161]	7	16.6667	2.47777e-10	6.41742e-08	{Group160=2.095925753462619E-36, Group161=1.2972628010365007E-28}	{Group160=3.311562690470938E-34, Group161=1.945894201554751E-26}	[BCL2L1, CASP8, HMOX1, ICAM1, IL6, NOS3, SERPINE1]	[ARHGEF2, BCL2L1, BMP5, BRCA1, CASP8, CFLAR, DAPK1, FADD, FAIM2, FAS, FASLG, FASN, FGA, FGB, FGG, GPX1, HGF, HMGB2, HMOX1, ICAM1, IL6, NANOS3, NOS3, PARK7, PEA15, RAF1, RFFL, RIPK1, RNASE3, RNF34, SCRT2, SERPINE1, SFRP2, SOS1, TANK, TMBIM1, TNFAIP3, TNFRSF10A, TNFRSF10B, TNFSF10, TRADD, TRAF2]	FALSE
GO:0071248	GO_BiologicalProcess-GOA_23.02.2017_10h01	cellular response to metal ion	[5]	[Group155]	10	6.32911	5.36581e-10	1.37365e-07	{Group155=1.5800558011000385E-30}	{Group155=2.4490864917050597E-28}	[CREB1, EGFR, FOS, HMOX1, IL4, MAPK1, MAPK3, MAPK8, PARP1, SOD1]	[ACER1, ADCY1, ADD1, AKR1C3, AKT1, ALAD, ALOX15, ALOX5AP, ANK3, AOC1, AQP1, AQP2, ASPH, ATF4, ATP13A2, ATP7A, B2M, BECN1, BMP6, BNIP3, BRAF, CACNA1H, CACYBP, CALR, CAMK2D, CAPN3, CARF, CCNB1, CD86, CDH1, CDKN1B, CDKN2AIP, CEBPA, CHP2, CHUK, CLDN1, CLIC4, CLU, CPNE1, CPNE2, CPNE3, CPNE6, CPNE7, CREB1, CRHBP, CYBB, CYP11B1, CYP11B2, CYP1A1, CYP1A2, DAXX, DMTN, DPEP1, ECT2, EDN1, EEF2K, EGFR, EIF2AK…	FALSE
GO:0050670	GO_BiologicalProcess-GOA_23.02.2017_10h01	regulation of lymphocyte proliferation	[5, 6, 7]	[Group161]	11	5.16432	6.03157e-10	1.53805e-07	{Group161=1.2972628010365007E-28}	{Group161=1.945894201554751E-26}	[BCL2, CASP3, CD4, CD40LG, CD81, IFNG, IL10, IL1B, IL2, IL4, IL6]	[ADA, AGER, AHR, AIF1, AMH, ANXA1, ATAD5, ATM, BCL2, BCL6, BMP4, BTK, BTN2A2, BTNL2, C00870, C18200, C21orf33, CARD11, CASP3, CCDC88B, CCL19, CCL5, CCR2, CD1D, CD209, CD24, CD244, CD274, CD276, CD28, CD300A, CD38, CD3E, CD4, CD40, CD40LG, CD46, CD55, CD59, CD6, CD74, CD80, CD81, CD86, CDKN1A, CDKN2A, CEBPB, CHRNB2, CLC, CLCF1, CLEC4G, CORO1A, CTLA4, CTNNB1, DEAF1, DHPS, DLG1, DNAJA3, EBI3, EFNB1,…	FALSE
GO:0050870	GO_BiologicalProcess-GOA_23.02.2017_10h01	positive regulation of T cell activation	[5, 6, 7, 8]	[Group161]	11	4.7619	1.42331e-09	3.52981e-07	{Group161=1.2972628010365007E-28}	{Group161=1.945894201554751E-26}	[CCL2, CD4, CD40LG, DPP4, GRB2, IFNG, IL1B, IL2, IL4, IL6, PIK3R1]	[ADA, ADAM8, AGER, AIF1, AKT1, ANXA1, AP3B1, AP3D1, ARHGEF7, BAD, BCL10, BTLA, BTNL2, C00870, C18200, C21orf33, CARD11, CAV1, CCDC88B, CCL19, CCL2, CCL21, CCL5, CCR2, CCR7, CD1D, CD24, CD244, CD247, CD27, CD274, CD276, CD28, CD3D, CD3E, CD3G, CD4, CD40LG, CD46, CD47, CD5, CD55, CD59, CD6, CD74, CD80, CD83, CD86, CDC42, CORO1A, CSK, CTLA4, CYLD, DEAF1, DHPS, DNAJA3, DPP4, EBI3, EFNB1, EFNB2, EFNB3…	FALSE
GO:0002699	GO_BiologicalProcess-GOA_23.02.2017_10h01	positive regulation of immune effector process	[3, 4, 5]	[Group064, Group091, Group124, Group141, Group147, Group157, Group161]	10	5.68182	1.53984e-09	3.788e-07	{Group064=1.2494360185450583E-22, Group091=1.9643660437894692E-20, Group124=7.279489626776259E-30, Group141=5.055409846520685E-27, Group147=2.219335197191626E-28, Group157=6.014358351570216E-37, Group161=1.2972628010365007E-28}	{Group064=1.586783743552224E-20, Group091=2.3179519316715738E-18, Group124=1.1064824232699913E-27, Group141=7.330344277454994E-25, Group147=3.306809443815523E-26, Group157=9.562829778996643E-35, Group161=1.945894201554751E-26}	[CCL2, HMOX1, IFNG, IL1B, IL2, IL4, IL6, MAPK14, MAPK3, TNF]	[ADORA2B, AMH, ANKRD17, ANXA1, AP1G1, ATAD5, B2M, BCL10, BTK, C12orf4, C3, C6, CADM1, CCL19, CCL2, CCR2, CD226, CD244, CD28, CD300A, CD36, CD40, CD46, CD74, CD80, CD84, CD86, CLCF1, CRTAM, DDX60, DEFB103A, DHX58, EHHADH, EXOSC3, EXOSC6, F2RL1, FADD, FCER1A, FCER1G, FCER2, FER, FES, FFAR2, FFAR3, FGR, FOXF1, FOXP3, FZD5, GAB2, GATA2, GATA3, GNPDA1, GPI, GPRC5B, HLA-A, HLA-B, HLA-DMB, HLA-E, HLX, H…	FALSE
GO:0008637	GO_BiologicalProcess-GOA_23.02.2017_10h01	apoptotic mitochondrial changes	[5, 6]	[Group090, Group109, Group122, Group160]	9	6.66667	2.63586e-09	6.32605e-07	{Group090=1.5479791277768595E-23, Group109=9.5049965209969E-19, Group122=1.1159148140695808E-17, Group160=2.095925753462619E-36}	{Group090=2.0433324486654544E-21, Group109=9.219846625366993E-17, Group122=1.0154824808033186E-15, Group160=3.311562690470938E-34}	[ATF2, BAX, BCL2, BCL2L1, CASP8, IL6, MAPK8, MCL1, TP53]	[ACAA2, AIFM2, AKT1, APOPT1, ARRB2, ATF2, ATG3, ATP2A1, ATPIF1, AVP, BAD, BAK1, BAX, BBC3, BCL2, BCL2L1, BCL2L11, BID, BIK, BLOC1S2, BMF, BNIP3, BNIP3L, BOK, C13662, C22orf29, CAMK2A, CASP8, CCAR2, CCK, CDKN2A, CIDEB, CLU, DNM1L, DYNLL1, DYNLL2, E2F1, ERBB4, EYA1, EYA2, FAM162A, FIS1, FXN, FZD9, GCLC, GCLM, GDNF, GGCT, GPER1, GPX1, GSK3A, GSK3B, GZMB, HGF, HIP1R, HK2, HOOK2, HRK, HSPA1A, HSPD1, I…	FALSE
GO:0050731	GO_BiologicalProcess-GOA_23.02.2017_10h01	positive regulation of peptidyl-tyrosine phosphorylation	[7, 8, 9, 10, 11]	[Group161]	10	5.37634	2.63269e-09	6.34478e-07	{Group161=1.2972628010365007E-28}	{Group161=1.945894201554751E-26}	[ACE, CD4, CD81, CSF2, ICAM1, IFNG, IL2, IL4, IL6, TP53]	[ABI1, ABI2, ABL1, ACE, ADAM17, ADIPOQ, ADNP, ADORA1, ADRA2A, ADRA2B, ADRA2C, AFAP1L2, AGT, AGXT, ALKAL1, ALKAL2, AMH, ANGPT1, ANGPT4, AREG, ARHGEF2, ARL2BP, ARRB2, C18200, C21orf33, CCK, CCL5, CCM2, CD24, CD36, CD3E, CD4, CD40, CD44, CD74, CD80, CD81, CLCF1, CNTF, CNTN1, CRLF1, CSF1R, CSF2, CSF3, CSPG4, CTF1, DGKQ, DOK7, DVL2, EFNA1, EFNA5, EGF, EHD4, ENPP2, EPGN, EPO, EPX, ERBB3, ERBB4, ERCC6, …	FALSE
GO:0050671	GO_BiologicalProcess-GOA_23.02.2017_10h01	positive regulation of lymphocyte proliferation	[5, 6, 7, 8]	[Group161]	9	6.38298	3.87284e-09	9.17864e-07	{Group161=1.2972628010365007E-28}	{Group161=1.945894201554751E-26}	[BCL2, CD4, CD40LG, CD81, IFNG, IL1B, IL2, IL4, IL6]	[ADA, AGER, AIF1, AMH, ANXA1, ATAD5, BCL2, BCL6, BTNL2, C00870, C18200, C21orf33, CARD11, CCDC88B, CCL19, CCL5, CCR2, CD1D, CD24, CD244, CD274, CD276, CD28, CD38, CD3E, CD4, CD40, CD40LG, CD46, CD55, CD59, CD6, CD74, CD80, CD81, CD86, CDKN1A, CHRNB2, CLCF1, CORO1A, DEAF1, DHPS, DNAJA3, EBI3, EFNB1, EPO, EPX, FADD, FGF10, FOXP3, GPAM, GPR183, HAVCR2, HES1, HHLA2, HLA-A, HLA-DMB, HLA-DPA1, HLA-DPB1…	FALSE
GO:0031668	GO_BiologicalProcess-GOA_23.02.2017_10h01	cellular response to extracellular stimulus	[3, 4]	[Group052, Group059, Group143, Group155]	10	4.71698	9.27762e-09	2.08746e-06	{Group052=5.019251775501425E-16, Group059=7.565770288482156E-24, Group143=1.0304610897274216E-26, Group155=1.5800558011000385E-30}	{Group052=3.764438831626069E-14, Group059=1.013813218656609E-21, Group143=1.4735593583102129E-24, Group155=2.4490864917050597E-28}	[BCL2, FOS, HMOX1, ICAM1, IL6, MAPK1, MAPK3, MAPK8, PPARG, TP53]	[ADNP, ADORA2B, AES, AIF1, AIFM1, AKR1C3, ALB, AMBRA1, AOC1, AQP2, ARHGAP35, ASGR1, ASNS, ATF3, ATF4, ATG14, ATG5, ATG7, ATP2B1, AVPR1A, AXL, BCL2, BECN1, BECN2, BGLAP, BHLHA15, BMPR2, BRIP1, CADPS2, CARTPT, CASR, CAV1, CBL, CBS, CDKN1A, CDKN2B, CHMP1A, COL1A1, COMT, CPEB4, CTSV, CYP24A1, CYP27B1, DAP, DAPL1, DCTPP1, DEPDC5, DNAJC15, DNM1L, DNPEP, DSC2, DSC3, EHMT2, EIF2AK2, EIF2AK3, EIF2AK4, EIF…	FALSE
GO:0033273	GO_BiologicalProcess-GOA_23.02.2017_10h01	response to vitamin	[4, 6]	[Group028, Group067, Group083, Group097, Group155, Group158, Group159]	8	7.20721	1.15526e-08	2.57623e-06	{Group028=2.469054413533442E-14, Group067=3.8968317253609067E-17, Group083=9.283507481187041E-23, Group097=5.641539777391449E-38, Group155=1.5800558011000385E-30, Group158=2.1814444388913482E-30, Group159=2.3614833448420293E-33}	{Group028=1.5308137363907342E-12, Group067=3.3123069665567706E-15, Group083=1.1882889575919413E-20, Group097=9.026463643826318E-36, Group155=2.4490864917050597E-28, Group158=3.3594244358926764E-28, Group159=3.6839140179535657E-31}	[CAT, CCL2, CD4, CXCL10, EGFR, PPARG, PTGS2, RELA]	[ABCB4, ADA, ALAD, ALDH1A2, ALPL, AQP3, ARG1, ARID4A, ASCL1, ATP2B1, BCHE, BECN1, BGLAP, BMP7, BRIP1, C13055, C16051, C18200, CASR, CAT, CCL2, CCND1, CD4, CD40, CDKN2D, COL1A1, CRAT, CXCL10, CXXC1, CYP1A1, CYP24A1, CYP27B1, DNMT3A, DNMT3B, EEF2, EGFR, EPO, EPX, F5, F7, FADS1, FGF23, FKBP1B, FOLR1, FOLR2, GAS6, GATA4, GDAP1, GLYAT, GSN, GSTP1, HAMP, HLCS, HMGCS1, IL15, ITGA2, KANK2, KYNU, LEP, LON…	FALSE
GO:0000187	GO_BiologicalProcess-GOA_23.02.2017_10h01	activation of MAPK activity	[7, 8, 9, 10, 11, 12, 13]	[Group118, Group124, Group143, Group147, Group149, Group155, Group157, Group161]	9	5.625	1.17621e-08	2.61119e-06	{Group118=4.905106245059882E-26, Group124=7.279489626776259E-30, Group143=1.0304610897274216E-26, Group147=2.219335197191626E-28, Group149=2.409346134030596E-21, Group155=1.5800558011000385E-30, Group157=6.014358351570216E-37, Group161=1.2972628010365007E-28}	{Group118=6.916199805534434E-24, Group124=1.1064824232699913E-27, Group143=1.4735593583102129E-24, Group147=3.306809443815523E-26, Group149=2.963495744857633E-19, Group155=2.4490864917050597E-28, Group157=9.562829778996643E-35, Group161=1.945894201554751E-26}	[CD40LG, CD81, IL1B, IL6, MAPK1, MAPK14, MAPK3, SOD1, TNF]	[ADAM8, ADORA2B, ADRA2A, ADRA2B, ADRA2C, AKAP13, ALK, APP, ARHGEF7, ARRB1, AVPI1, AXIN1, BIRC7, BMP2, BUD31, C1QTNF2, C5, C5AR1, CCL19, CD40LG, CD74, CD81, CDK1, CHRFAM7A, CHRNA7, CSPG4, CXCL17, CXCR4, DAB2IP, DAXX, DBNL, DRD4, DUSP5, DUSP6, DUSP7, DUSP9, EFNA1, EGF, EPGN, ERCC6, ERN1, ERN2, ERP29, ETFA, ETFB, ETFDH, FCER1A, FGF1, FGF10, FGF13, FGF2, FPR1, FRS2, GAB1, GHR, GHRL, GNG3, GRM1, GRM4,…	FALSE
GO:0031281	GO_BiologicalProcess-GOA_23.02.2017_10h01	positive regulation of cyclase activity	[5]	[Group018, Group035, Group124, Group146, Group154]	7	9.72222	1.23361e-08	2.72628e-06	{Group018=5.1128769996314335E-12, Group035=3.855205702182162E-15, Group124=7.279489626776259E-30, Group146=5.380402153400938E-28, Group154=1.203528415039811E-23}	{Group018=1.7895069498710018E-10, Group035=2.5444357634402266E-13, Group124=1.1064824232699913E-27, Group146=7.909191165499379E-26, Group154=1.6006927920029487E-21}	[CALM1, MAPK14, MAPK3, MAPK8, NOS2, NOS3, PRKCA]	[ACR, ADCY1, ADCY2, ADCY3, ADCY4, ADCY5, ADCY6, ADCY7, ADCY8, ADCY9, ADCYAP1, ADGRD1, ADGRG6, ADORA2A, ADORA2B, ADORA3, ADRB1, ADRB2, ADRB3, AVPR2, C16119, CACNA1A, CALCA, CALCR, CALM1, CAP1, CAP2, CPAMD8, CRHR1, DRD1, DRD5, EDNRA, FSHR, GHRHR, GIPR, GLP1R, GNAL, GNAS, GPER1, GUCA1A, GUCA1B, GUCA1C, GUCA2A, GUCA2B, HPCA, LHCGR, MAPK14, MAPK3, MAPK8, NANOS1, NANOS2, NANOS3, NF1, NOS1, NOS2, NOS3, …	FALSE
GO:0042129	GO_BiologicalProcess-GOA_23.02.2017_10h01	regulation of T cell proliferation	[6, 7, 8]	[Group161]	9	5.59006	1.24204e-08	2.73248e-06	{Group161=1.2972628010365007E-28}	{Group161=1.945894201554751E-26}	[CASP3, CD4, CD40LG, IFNG, IL10, IL1B, IL2, IL4, IL6]	[AGER, AIF1, ANXA1, BMP4, BTN2A2, BTNL2, C00870, C18200, C21orf33, CARD11, CASP3, CCDC88B, CCL19, CCL5, CCR2, CD1D, CD209, CD24, CD244, CD274, CD276, CD28, CD3E, CD4, CD40LG, CD46, CD55, CD59, CD6, CD80, CD86, CDKN2A, CEBPB, CLC, CLCF1, CLEC4G, CORO1A, CTLA4, CTNNB1, DEAF1, DHPS, DLG1, DNAJA3, EBI3, EFNB1, EPO, EPX, ERBB2, FADD, FOXJ1, FOXP3, GLMN, GNRH1, GPAM, GPNMB, HAVCR2, HES1, HHLA2, HLA-A, …	FALSE
GO:1904035	GO_BiologicalProcess-GOA_23.02.2017_10h01	regulation of epithelial cell apoptotic process	[6, 7]	[Group132, Group160, Group161]	7	9.58904	1.36026e-08	2.97896e-06	{Group132=1.6327869166520973E-27, Group160=2.095925753462619E-36, Group161=1.2972628010365007E-28}	{Group132=2.383868898312062E-25, Group160=3.311562690470938E-34, Group161=1.945894201554751E-26}	[CD40LG, HMOX1, ICAM1, IL10, IL4, IL6, SERPINE1]	[ABL1, AKR1C3, ANGPT1, ANGPTL4, ANO6, BOK, BRAF, CAPN10, CAST, CD248, CD3EAP, CD40, CD40LG, CFLAR, COL18A1, ECSCR, EIF2S1, ERC2, FASLG, FGA, FGB, FGF21, FGG, FOXO3, GAS6, GATA3, GPER1, GSN, HMOX1, ICAM1, IL10, IL13, IL4, IL6, JAK2, KDR, KRIT1, MAPK7, MEN1, MST1, MTOR, NDNF, NEUROD1, NFE2L2, PDCD4, PDHX, PDX1, PIAS4, PPARGC1A, PRKCI, RAMP2, RGCC, SCG2, SEMA5A, SERPINB13, SERPINE1, SFRP4, SORT1, SP…	FALSE
GO:0071312	GO_BiologicalProcess-GOA_23.02.2017_10h01	cellular response to alkaloid	[5, 6]	[Group052, Group070, Group102, Group105, Group119, Group129, Group139, Group158, Group159, Group161]	6	13.9535	1.55988e-08	3.38493e-06	{Group052=5.019251775501425E-16, Group070=7.878512232929875E-18, Group102=5.266614387496279E-16, Group105=7.609187719694851E-20, Group119=1.6445864070363825E-16, Group129=5.489879487929511E-20, Group139=2.373309952007317E-19, Group158=2.1814444388913482E-30, Group159=2.3614833448420293E-33, Group161=1.2972628010365007E-28}	{Group052=3.764438831626069E-14, Group070=7.405801498954083E-16, Group102=3.897294646747246E-14, Group105=8.370106491664335E-18, Group119=1.2827773974883783E-14, Group129=6.0937662316017574E-18, Group139=2.5157085491277562E-17, Group158=3.3594244358926764E-28, Group159=3.6839140179535657E-31, Group161=1.945894201554751E-26}	[BCL2L1, CASP3, ICAM1, NFKB1, RELA, TNF]	[ABCB4, AIF1, ATG7, BAD, BCL2L1, BLM, C16079, CASP3, CASP6, CASP7, CASQ2, CCNA2, CRH, CRHBP, DDC, EHMT2, FAM58A, GSTM2, GUCY2C, HTR1B, ICAM1, KCNJ11, MDM2, MSX1, NFKB1, NTRK1, OPRM1, PPARGC1A, PPP1R9B, RAD51, RECQL5, RELA, RYR1, RYR2, RYR3, SELENON, SLC34A1, SLC8A1, SPIDR, STAR, TH, TNF, TRPV1]	FALSE
GO:0046718	GO_BiologicalProcess-GOA_23.02.2017_10h01	viral entry into host cell	[5, 6, 7, 8]	[Group022, Group073]	8	6.77966	1.87322e-08	4.04615e-06	{Group022=1.0673875035391895E-13, Group073=3.0729508041895474E-17}	{Group022=5.336937517695947E-12, Group073=2.6427376916030108E-15}	[ACE2, ANPEP, CD4, CD81, CTSB, DPP4, ICAM1, PPIA]	[ACE2, ANPEP, APCS, AXL, CAV1, CAV2, CCR5, CD209, CD4, CD46, CD55, CD74, CD80, CD81, CD86, CDHR3, CLDN1, CLEC4G, CLEC4M, CLEC5A, CR1, CR2, CTSB, CXADR, CXCR4, DAG1, DPP4, DYNLT1, EFNB2, EFNB3, EPS15, F11R, FCN1, FCN3, GAS6, GRK2, GSN, GYPA, HAVCR1, HLA-DRB1, HS3ST5, HS3ST6, HSBP1L1, HSPA1A, HSPA1B, HTR2A, HYAL2, ICAM1, IDE, IFITM1, IFITM2, IFITM3, IFNA2, ITCH, ITGA2, ITGA5, ITGAV, ITGB1, ITGB3, I…	FALSE
GO:2001242	GO_BiologicalProcess-GOA_23.02.2017_10h01	regulation of intrinsic apoptotic signaling pathway	[5, 6, 7, 8]	[Group107, Group120, Group121, Group160]	9	5.32544	1.8957e-08	4.07576e-06	{Group107=9.28476033582257E-18, Group120=1.0480295495135786E-20, Group121=8.591502166967616E-20, Group160=2.095925753462619E-36}	{Group107=8.63482711231499E-16, Group120=1.2471551639211586E-18, Group121=9.278822340325026E-18, Group160=3.311562690470938E-34}	[BAX, BCL2, BCL2L1, HSPB1, MCL1, PARP1, PTGS2, SOD1, TP53]	[ACKR3, AKT1, AMH, ANKRD2, ARHGEF2, ATAD5, BAD, BAG5, BAX, BBC3, BCAP31, BCL2, BCL2L1, BCL2L10, BCL2L11, BCL2L12, BCLAF1, BDKRB1, BDKRB2, BID, BMF, BOK, C18200, CAV1, CCAR2, CD44, CD74, CDKN2D, CLU, CREB3, CREB3L1, CREB3L4, CXCL12, CYLD, DAPK2, DDIT3, DDX3X, DFNA5, DNAJA1, DNM1L, EIF2AK3, ELL3, ENO1, EPO, EPX, ERP29, FBXO18, FBXW7, FIGNL1, FIS1, GPX1, GRINA, HELLS, HERPUD1, HIF1A, HNRNPK, HSP90B2…	FALSE
GO:1901216	GO_BiologicalProcess-GOA_23.02.2017_10h01	positive regulation of neuron death	[4, 5, 6]	[Group122, Group160]	7	9.09091	1.98308e-08	4.24379e-06	{Group122=1.1159148140695808E-17, Group160=2.095925753462619E-36}	{Group122=1.0154824808033186E-15, Group160=3.311562690470938E-34}	[APOE, ATF2, BAX, CASP3, MCL1, PARP1, TP53]	[ABL1, AIFM1, AIMP2, APOE, ARHGEF7, ASCL1, ATF2, ATF4, ATM, BAD, BAX, BBC3, BCL2L11, CASP2, CASP3, CASP9, CCL3, CDC34, CDC42, CDK5, CDK5R1, CLU, CTNNB1, CTSZ, DAXX, DDIT3, DDIT4, EIF2S1, ELK1, EPHA7, FASLG, FBXW7, FIS1, FOXO3, FYN, GDNF, GRIK2, GRIK5, GSK3B, HDAC4, ITGA1, JUN, KCNH4, KCNH8, MAP2K4, MAP3K11, MAP3K5, MAPT, MCL1, MTOR, MYB, MYBL2, NF1, NQO1, NQO2, PAK3, PARP1, PCSK9, PDZD2, PICALM, …	FALSE
GO:0007006	GO_BiologicalProcess-GOA_23.02.2017_10h01	mitochondrial membrane organization	[4, 5]	[Group109, Group122, Group128, Group160]	8	6.50406	2.59691e-08	5.47949e-06	{Group109=9.5049965209969E-19, Group122=1.1159148140695808E-17, Group128=2.43620398361868E-20, Group160=2.095925753462619E-36}	{Group109=9.219846625366993E-17, Group122=1.0154824808033186E-15, Group128=2.825996620997669E-18, Group160=3.311562690470938E-34}	[ATF2, BAX, BCL2, BCL2L1, CALM1, CASP8, MAPK8, TP53]	[ACAA2, AFG3L2, ALKBH7, APOO, APOOL, ATF2, ATPIF1, BAD, BAK1, BAX, BBC3, BCL2, BCL2L1, BCL2L11, BID, BLOC1S2, BMF, BNIP3, BNIP3L, BOK, C16005, C19orf70, C22orf29, CALM1, CAMK2A, CASP8, CHCHD3, CHCHD6, CLN8, CNP, COX18, DYNLL1, DYNLL2, E2F1, ERGIC3, EYA1, EYA2, FZD9, GDNF, GSK3A, GSK3B, GZMB, HEBP2, HIP1R, HK2, HOOK2, HSP90AA1, HSPA1A, HSPA4, IMMT, KCNA5, KIF2A, LETM1, MAIP1, MAPK8, MED12, MFN1, M…	FALSE
GO:0071260	GO_BiologicalProcess-GOA_23.02.2017_10h01	cellular response to mechanical stimulus	[4]	[Group034, Group053, Group097, Group128, Group155, Group160]	7	8.64198	2.83233e-08	5.9479e-06	{Group034=1.4198320846036622E-18, Group053=9.576111518151522E-14, Group097=5.641539777391449E-38, Group128=2.43620398361868E-20, Group155=1.5800558011000385E-30, Group160=2.095925753462619E-36}	{Group034=1.3630388012195157E-16, Group053=4.979577989438792E-12, Group097=9.026463643826318E-36, Group128=2.825996620997669E-18, Group155=2.4490864917050597E-28, Group160=3.311562690470938E-34}	[CASP8, EGFR, IL1B, MAPK3, MAPK8, NFKB1, PTGS2]	[AGT, AGXT, AKT1, ANKRD1, AQP1, ARHGDIA, ATP1A1, ATP1A2, ATP1A3, ATP1A4, BAD, BAG3, BAK1, BCL10, BMP6, BNIP3, CASP1, CASP2, CASP5, CASP8, CASP8AP2, CD40, CHEK1, CNN2, COL1A1, CRADD, CYBA, DAG1, EGFR, ENG, FADD, FAS, FASN, GADD45A, GCLC, GJA1, HABP4, HDAC4, IL13, IL1B, IRF1, ITGA2, KCNJ2, KCNK4, LTBR, MAG, MAP2K4, MAP3K1, MAP3K14, MAP3K2, MAPK3, MAPK8, MMP7, MTPN, MYD88, NFKB1, NPPA, PDE2A, PIEZO1…	FALSE
GO:0002822	GO_BiologicalProcess-GOA_23.02.2017_10h01	regulation of adaptive immune response based on somatic recombination of immune receptors built from immunoglobulin superfamily domains	[5, 6]	[Group138, Group141, Group148, Group161]	8	6.34921	3.13777e-08	6.55794e-06	{Group138=2.2350029818032858E-20, Group141=5.055409846520685E-27, Group148=7.862789791132838E-14, Group161=1.2972628010365007E-28}	{Group138=2.6149534887098442E-18, Group141=7.330344277454994E-25, Group148=4.2459064872117324E-12, Group161=1.945894201554751E-26}	[CD4, IFNG, IL10, IL1B, IL2, IL4, IL6, TNF]	[ADA, AGER, ANXA1, APLF, ATAD5, B2M, BCL6, BTK, C3, C4BPA, C4BPB, CCL19, CCR2, CD226, CD28, CD4, CD40, CD80, CEACAM1, CLC, CLCF1, CLEC4G, CR1, DEAF1, DUSP22, EXOSC3, EXOSC6, FADD, FCER1A, FCER1G, FCER2, FOXJ1, FOXP3, FZD5, GATA3, HAVCR2, HFE, HLA-A, HLA-B, HLA-DQB2, HLA-E, HLX, HMGB1, HPX, HSPD1, IFNA2, IFNB1, IFNG, IL10, IL12A, IL12B, IL12RB1, IL1B, IL1RL1, IL2, IL20RB, IL23A, IL23R, IL27, IL27R…	FALSE
GO:0032655	GO_BiologicalProcess-GOA_23.02.2017_10h01	regulation of interleukin-12 production	[4, 5]	[Group102, Group115, Group126, Group139, Group145, Group161]	6	12	3.97966e-08	8.1981e-06	{Group102=5.266614387496279E-16, Group115=5.1646959803579173E-14, Group126=5.208615599587011E-13, Group139=2.373309952007317E-19, Group145=8.291268333444812E-26, Group161=1.2972628010365007E-28}	{Group102=3.897294646747246E-14, Group115=2.995523668607592E-12, Group126=2.2397047078224147E-11, Group139=2.5157085491277562E-17, Group145=1.1607775666822736E-23, Group161=1.945894201554751E-26}	[CD40LG, IFNG, IL10, MAPK14, NFKB1, RELA]	[AGER, ARRB2, C1QBP, CCL19, CCR7, CD36, CD40, CD40LG, CMKLR1, FOXP1, HLA-B, HLA-G, HMGB1, HSPD1, IDO1, IFNG, IL10, IL12B, IL23A, IL23R, IRAK3, IRF1, IRF5, IRF8, ISL1, JAK3, LGALS9, LILRB1, LTB, MAPK11, MAPK14, MAST2, MEFV, NFKB1, PIBF1, PLCB1, RELA, RIPK2, SLAMF1, THBS1, TIGIT, TIRAP, TLR2, TLR3, TLR4, TLR8, TLR9, TNFRSF9, TNFSF4, TRAF6]	FALSE
GO:0072577	GO_BiologicalProcess-GOA_23.02.2017_10h01	endothelial cell apoptotic process	[7]	[Group132, Group150, Group161]	6	12	3.97966e-08	8.1981e-06	{Group132=1.6327869166520973E-27, Group150=6.47380039518465E-25, Group161=1.2972628010365007E-28}	{Group132=2.383868898312062E-25, Group150=8.998582549306663E-23, Group161=1.945894201554751E-26}	[CD40LG, ICAM1, IL10, IL4, SERPINE1, TNF]	[ABL1, AKR1C3, ANGPT1, ANGPTL4, ANO6, BMPR2, BRAF, CD248, CD40, CD40LG, COL18A1, COL4A3, DAB2IP, ECSCR, FASLG, FGA, FGB, FGF21, FGG, FOXO3, GAS6, GATA3, GPER1, HIPK1, ICAM1, IL10, IL13, IL4, KDR, KRIT1, MAP3K5, MAPK7, MEN1, NDNF, NFE2L2, PDCD4, PRKCI, RAMP2, RGCC, SCG2, SEMA5A, SERPINE1, TEK, TERT, THBS1, TNF, TNFAIP3, TNIP2, XBP1, XBP1P1]	FALSE
GO:0043123	GO_BiologicalProcess-GOA_23.02.2017_10h01	positive regulation of I-kappaB kinase/NF-kappaB signaling	[5, 6, 7, 8]	[Group072, Group141, Group144, Group161]	9	4.83871	4.3497e-08	8.91688e-06	{Group072=3.6656708819119506E-14, Group141=5.055409846520685E-27, Group144=3.030093432374026E-28, Group161=1.2972628010365007E-28}	{Group072=2.162745820328051E-12, Group141=7.330344277454994E-25, Group144=4.484538279913559E-26, Group161=1.945894201554751E-26}	[CASP8, CD4, HMOX1, IL1B, PRKCB, PRKCE, PTGS2, RELA, TNF]	[ABL1, ADIPOQ, AJUBA, AKAP13, AKT1, ANKRD17, APOL2, APOL3, ATP2C1, BCL10, BIRC2, BIRC3, BRD4, BST2, C18orf32, C8orf4, CANT1, CARD11, CARD9, CASP1, CASP10, CASP8, CC2D1A, CCDC22, CCL19, CCL21, CCR7, CD27, CD36, CD4, CD40, CD74, CFLAR, CHUK, CLEC6A, CTH, CTNNB1, CXXC5, DDRGK1, ECM1, ECT2, EDA, EDA2R, EDAR, EEF1D, F2R, F2RL1, FADD, FASLG, FKBP1A, FLNA, FYN, GJA1, GOLT1B, GPR89A, GPRC5B, GREM1, HLA-D…	FALSE
GO:0002367	GO_BiologicalProcess-GOA_23.02.2017_10h01	cytokine production involved in immune response	[3, 4]	[Group059, Group147, Group149, Group157, Group161]	7	8.04598	4.67256e-08	9.48529e-06	{Group059=7.565770288482156E-24, Group147=2.219335197191626E-28, Group149=2.409346134030596E-21, Group157=6.014358351570216E-37, Group161=1.2972628010365007E-28}	{Group059=1.013813218656609E-21, Group147=3.306809443815523E-26, Group149=2.963495744857633E-19, Group157=9.562829778996643E-35, Group161=1.945894201554751E-26}	[HMOX1, IL10, IL4, IL6, MAPK14, MAPK3, TNF]	[AMH, ANGPT1, APOA1, APOA2, ATG5, B2M, BCL10, BCL6, BST2, BTK, CD226, CD36, CD55, CD74, CD96, CHGA, CLC, CLCF1, CUEDC2, DENND1B, DLG1, F2RL1, FCER1G, FFAR2, FFAR3, FOXP3, FZD5, GAS6, GATA3, GPRC5B, HFE, HLA-A, HMOX1, HSPD1, IFNA2, IFNB1, IL10, IL31RA, IL4, IL6, IRAK3, JAK3, KARS, KDELR1, KIT, LGALS17A, LILRB1, LPAL2, MALT1, MAP3K7, MAPK14, MAPK3, MIF, MR1, NLRP3, NOD2, NR4A3, PNKD, PRKCZ, RNU6-66…	FALSE
GO:0007259	GO_BiologicalProcess-GOA_23.02.2017_10h01	JAK-STAT cascade	[5, 6, 7]	[Group143, Group161]	9	4.7619	4.99311e-08	1.00861e-05	{Group143=1.0304610897274216E-26, Group161=1.2972628010365007E-28}	{Group143=1.4735593583102129E-24, Group161=1.945894201554751E-26}	[CCL2, CSF2, IFNG, IL2, IL4, IL6, MAPK1, MAPK3, STAT1]	[ADIPOR1, AGAP2, AGT, AGXT, AKR1B1, ARL2BP, ASPN, BGN, C18200, C18201, C21orf33, CAV1, CCL2, CCL5, CCM2, CCR2, CD300A, CD40, CDK5, CDK5R1, CHAD, CISH, CLCF1, CNTF, CRLF1, CRLF3, CSF1R, CSF2, CSH1, CTF1, CTR9, CYP1B1, DAB1, DCN, DNAAF3, DOT1L, EGF, ELP2, EPO, EPX, ERBB4, F2R, FER, FGFR3, FLRT1, FLRT2, FLRT3, FLT3, FYN, GFRA2, GGNBP2, GH1, GH2, GHR, GP1BA, GPI, HCLS1, HDAC2, HES1, HES5, HGS, HMGA2,…	FALSE
GO:0071622	GO_BiologicalProcess-GOA_23.02.2017_10h01	regulation of granulocyte chemotaxis	[5, 6, 7, 8, 9, 10]	[Group080, Group091, Group147, Group157, Group161]	6	11.3208	5.69689e-08	1.13938e-05	{Group080=2.1232905665321592E-17, Group091=1.9643660437894692E-20, Group147=2.219335197191626E-28, Group157=6.014358351570216E-37, Group161=1.2972628010365007E-28}	{Group080=1.8684956985483E-15, Group091=2.3179519316715738E-18, Group147=3.306809443815523E-26, Group157=9.562829778996643E-35, Group161=1.945894201554751E-26}	[CCL2, CXCL2, CXCL8, IL4, MAPK14, MAPK3]	[BST1, C1QBP, C3AR1, C5AR1, C5AR2, CAMK1D, CCL19, CCL2, CCL21, CCL5, CCR7, CD74, CMKLR1, CSF1, CXCL1, CXCL17, CXCL2, CXCL3, CXCL5, CXCL6, CXCL8, DAPK2, EDN1, EHHADH, IL23A, IL4, JAM3, KARS, KIF20B, LBP, MAPK14, MAPK3, MPP1, NCKAP1L, PF4, PF4V1, PPBP, RAC1, RAC2, RARRES2, RNASE1, RPSA, S100A11P1, S100A14, S100A7, SLAMF1, SLIT2, THBS1, THBS4, TIRAP, TNFSF18, TRPV4, XCL1]	FALSE
GO:0030316	GO_BiologicalProcess-GOA_23.02.2017_10h01	osteoclast differentiation	[7, 8, 9, 10]	[Group130, Group161]	7	7.69231	6.39305e-08	1.26582e-05	{Group130=8.72359720625284E-19, Group161=1.2972628010365007E-28}	{Group130=8.549125262127783E-17, Group161=1.945894201554751E-26}	[CREB1, FOS, IFNG, IL4, MAPK14, PIK3R1, TNF]	[ANXA2, ATP6AP1, BGLAP, CA2, CALCA, CALCR, CAMK4, CARTPT, CCL3, CCR1, CD109, CEBPB, CLDN18, CREB1, CSF1, CSF1R, CTNNB1, DCSTAMP, EFNA2, EPHA2, ESRRA, FAM20C, FAM213A, FARP2, FBN1, FOS, FOXP1, FSHB, FSHR, FSTL3, GAB2, GLO1, GNAS, GPC3, GPR183, GPR55, GPR68, IFNG, IL12B, IL17A, IL20, IL23A, IL23R, IL4, INPP5D, IREB2, JUNB, KLF10, LHCGR, LILRA6, LILRB1, LILRB3, LILRB4, LRRC17, LRRK1, LTF, MAFB, MAPK…	FALSE
GO:0050663	GO_BiologicalProcess-GOA_23.02.2017_10h01	cytokine secretion	[4, 5, 6, 7, 8, 9]	[Group086, Group101, Group118, Group147, Group157, Group161]	9	4.59184	6.82686e-08	1.34489e-05	{Group086=1.2095964201304352E-16, Group101=6.970265301625163E-27, Group118=4.905106245059882E-26, Group147=2.219335197191626E-28, Group157=6.014358351570216E-37, Group161=1.2972628010365007E-28}	{Group086=9.676771361043482E-15, Group101=1.0037182034340234E-24, Group118=6.916199805534434E-24, Group147=3.306809443815523E-26, Group157=9.562829778996643E-35, Group161=1.945894201554751E-26}	[IFNG, IL10, IL1A, IL1B, IL6, MAPK14, MAPK3, NOS2, TNF]	[ABCA1, ABL1, AGT, AGTR2, AGXT, AIM2, ALOX15B, AMH, ANGPT1, ANXA1, ANXA4, APOA1, APOA2, ATG5, BANK1, BTN2A2, BTN3A1, BTN3A2, BTNL2, C00870, C1QTNF3, C5, C5AR2, CADM1, CAMP, CARD11, CARD8, CASP1, CASP5, CCL19, CCL3, CCR7, CD14, CD2, CD244, CD274, CD34, CD36, CD58, CHAMP1, CHI3L1, CHIA, CHUK, CIDEA, CLEC4E, CLEC5A, CLEC6A, CLEC9A, CRP, CRTAM, CSF1R, CSRP1, DRD2, EPHB6, EZR, F2R, F2RL1, FBLN1, FCN1,…	FALSE
GO:0048145	GO_BiologicalProcess-GOA_23.02.2017_10h01	regulation of fibroblast proliferation	[4, 5]	[Group023, Group159, Group160, Group161]	7	7.6087	6.89827e-08	1.35206e-05	{Group023=1.3370853332271275E-11, Group159=2.3614833448420293E-33, Group160=2.095925753462619E-36, Group161=1.2972628010365007E-28}	{Group023=3.87754746635867E-10, Group159=3.6839140179535657E-31, Group160=3.311562690470938E-34, Group161=1.945894201554751E-26}	[BAX, CDK4, CREB1, EGFR, IFNG, PPARG, TP53]	[AGT, AGTR2, AGXT, AMH, ANXA2, AQP1, B4GALT7, BAX, BMI1, BTC, C1QL4, CCNA2, CCNB1, CD300A, CD74, CDC6, CDC73, CDK4, CDK6, CDKN1A, CREB1, CTC1, CTNNB1, DAB2IP, DACH1, DDR2, E2F1, EGFR, EMD, EREG, ESR1, FBLN1, FBXO4, FGF10, FN1, FNTB, FOSL2, FTH1, GAS6, GSTP1, IFI30, IFNG, IGF1, IL13, JUN, LIG4, LTA, MED25, MED31, MED9, MIF, MORC3, MYB, MYC, NDUFS4, NF1, NUPR1, PARP10, PAWR, PDGFA, PDGFB, PDGFC, PD…	FALSE
GO:0051092	GO_BiologicalProcess-GOA_23.02.2017_10h01	positive regulation of NF-kappaB transcription factor activity	[3, 4, 5, 8, 9, 10, 11, 12, 13]	[Group059, Group105, Group119, Group132, Group139, Group144, Group159, Group161]	8	5.67376	7.55118e-08	1.47248e-05	{Group059=7.565770288482156E-24, Group105=7.609187719694851E-20, Group119=1.6445864070363825E-16, Group132=1.6327869166520973E-27, Group139=2.373309952007317E-19, Group144=3.030093432374026E-28, Group159=2.3614833448420293E-33, Group161=1.2972628010365007E-28}	{Group059=1.013813218656609E-21, Group105=8.370106491664335E-18, Group119=1.2827773974883783E-14, Group132=2.383868898312062E-25, Group139=2.5157085491277562E-17, Group144=4.484538279913559E-26, Group159=3.6839140179535657E-31, Group161=1.945894201554751E-26}	[CAT, CD40LG, ICAM1, IL1B, NFKB1, PRKCB, RELA, TNF]	[ADAM8, AGER, AGT, AGXT, AIM2, AKR1B1, ALK, AMH, AR, AREG, ARHGEF2, BCL10, BTK, CAMK2A, CAPN3, CARD11, CARD14, CARM1, CAT, CD40, CD40LG, CFLAR, CHUK, CIB1, CLOCK, CLU, CRAT, CTH, DDRGK1, EDA, EDA2R, EIF2AK2, ERC1, FER, GLYAT, GREM1, HSPA1A, HSPA1B, ICAM1, IKBKB, IKBKG, IL1B, IL1RAP, INS, IRAK1, IRAK2, IRAK3, IRAK4, ITGB2, KRAS, LGALS9, LRRFIP1, LTF, MALT1, MAP3K13, MAP3K7, MID2, MTDH, MTPN, MYD88…	FALSE
GO:0046683	GO_BiologicalProcess-GOA_23.02.2017_10h01	response to organophosphorus	[4]	[Group041, Group099, Group113, Group152, Group161]	8	5.6338	7.97739e-08	1.54761e-05	{Group041=1.01839353956105E-12, Group099=5.555412196230995E-16, Group113=4.548470078238836E-20, Group152=3.9478872628846304E-24, Group161=1.2972628010365007E-28}	{Group041=4.175413512200305E-11, Group099=4.055450903248627E-14, Group113=5.094286487627496E-18, Group152=5.329647804894251E-22, Group161=1.945894201554751E-26}	[CCL2, FOS, IL1B, PIK3CG, PTGS2, RELA, SOD1, STAT1]	[AANAT, ADIPOQ, AGXT, AKAP6, AKAP7, AKAP9, AKR1C1, ALDH3A1, APEX1, APP, AQP1, AQP8, AQP9, AREG, ASPH, BIRC2, BRAF, BSG, BUD31, C00746, C12orf76, CARM1, CASP1, CCL2, CDO1, CFTR, CIB2, CITED1, CNGA3, COL1A1, CPS1, CRHBP, CRLS1, CYP21A2, DGKQ, DMTN, DNTT, DUOX1, DUOX2, DUSP1, DUSP12, EEF2K, EZR, FAM58A, FDX1, FOS, FOSB, FOSL1, GPD1, GUCY2C, HCN1, HCN2, HCN4, HSP90B1, HSPA5, HSPD1, IGFBP5, IL1B, INPP…	FALSE
GO:0031294	GO_BiologicalProcess-GOA_23.02.2017_10h01	lymphocyte costimulation	[2, 5, 6, 7, 8]	[Group056, Group161]	7	7.36842	8.62113e-08	1.65526e-05	{Group056=8.114071639618488E-17, Group161=1.2972628010365007E-28}	{Group056=6.734679460883345E-15, Group161=1.945894201554751E-26}	[CD4, CD40LG, DPP4, GRB2, IL4, IL6, PIK3R1]	[AKT1, ARHGEF7, BTLA, CARD11, CAV1, CCL19, CCL21, CCR7, CD24, CD247, CD274, CD28, CD3D, CD3E, CD3G, CD4, CD40LG, CD5, CD80, CD86, CDC42, CSK, CTLA4, DEAF1, DPP4, EFNB1, EFNB2, EFNB3, EPHB6, FYN, GNAO1, GRAP2, GRB2, HHLA2, HLA-DPA1, HLA-DPB1, HLA-DQA1, HLA-DQA2, HLA-DQB1, HLA-DQB2, HLA-DRA, HLA-DRB1, HLA-DRB3, HLA-DRB4, HLA-DRB5, ICOS, ICOSLG, IL4, IL6, KLRK1, LCK, LGALS1, LOC105369230, LYN, MAP3K…	FALSE
GO:0032845	GO_BiologicalProcess-GOA_23.02.2017_10h01	negative regulation of homeostatic process	[2, 3, 4, 5]	[Group075, Group154, Group160]	9	4.41176	9.61897e-08	1.83722e-05	{Group075=2.6908036920448136E-16, Group154=1.203528415039811E-23, Group160=2.095925753462619E-36}	{Group075=2.0719188428745066E-14, Group154=1.6006927920029487E-21, Group160=3.311562690470938E-34}	[BAX, BCL2, CALM1, CXCL10, CXCL11, IL6, PARP1, PRKCA, PRKCE]	[ABL1, ACD, ADA, ADORA1, ADRA2A, AKAP6, AMH, ANK2, APEX1, APP, ARRDC3, ARTN, ASPH, ATG5, ATM, ATP1A2, AVPR2, BAX, BBC3, BCL10, BCL2, BDKRB1, BTF3P11, C18200, CACNA1C, CALCA, CALM1, CAMK2D, CAPN3, CARTPT, CASQ1, CASQ2, CATSPER4, CCL19, CCL21, CCL3, CCR5, CCR7, CD19, CD38, CD74, CEMIP, CHD7, CHERP, CLDN18, CLIC2, CLU, COMT, CORO1A, CSK, CXCL10, CXCL11, CXCL9, CXCR3, CYBA, DDIT3, DHRS7C, DIAPH1, DMD…	FALSE
GO:2001244	GO_BiologicalProcess-GOA_23.02.2017_10h01	positive regulation of intrinsic apoptotic signaling pathway	[5, 6, 7, 8, 9]	[Group090, Group095, Group120, Group121, Group122, Group136, Group158, Group160]	6	10.1695	1.09775e-07	2.05278e-05	{Group090=1.5479791277768595E-23, Group095=7.872064311268882E-19, Group120=1.0480295495135786E-20, Group121=8.591502166967616E-20, Group122=1.1159148140695808E-17, Group136=1.8509521382527809E-22, Group158=2.1814444388913482E-30, Group160=2.095925753462619E-36}	{Group090=2.0433324486654544E-21, Group095=7.793343668156193E-17, Group120=1.2471551639211586E-18, Group121=9.278822340325026E-18, Group122=1.0154824808033186E-15, Group136=2.313690172815976E-20, Group158=3.3594244358926764E-28, Group160=3.311562690470938E-34}	[BAX, BCL2, BCL2L1, MCL1, SOD1, TP53]	[BAD, BAX, BBC3, BCAP31, BCL2, BCL2L1, BCL2L11, BCLAF1, BID, BMF, BOK, CAV1, CLU, DDIT3, DFNA5, DNM1L, FBXO18, FBXW7, FIS1, IL19, IL20RA, LCK, LOC654780, MCL1, MSX1, MTCH2, NACC2, NCK1, NCK2, NKX3-1, NOX1, PARK7, PIAS4, PLAGL2, PLEKHF1, PMAIP1, PRKN, PRKRA, PTPN2, RACK1, RAD9A, RIPK3, RPL26, RPS3, RPS7, S100A8, S100A9, SEPT4, SERINC3, SFPQ, SIAH1, SIRT1, SKIL, SLC9A3R1, SOD1, SPOP, TP53, TP53BP1,…	FALSE
GO:0032869	GO_BiologicalProcess-GOA_23.02.2017_10h01	cellular response to insulin stimulus	[6, 7, 8]	[Group144, Group161]	9	4.18605	1.50573e-07	2.75549e-05	{Group144=3.030093432374026E-28, Group161=1.2972628010365007E-28}	{Group144=4.484538279913559E-26, Group161=1.945894201554751E-26}	[CCL2, CDK4, GRB2, IL1B, PARP1, PIK3R1, PPARG, PRKCB, RELA]	[ADIPOQ, ADIPOR1, AGT, AGXT, AHSG, AKT1, AKT2, AP3S1, APC, APOBEC1, APPL1, APRT, ATP6AP1, ATP6V0A1, ATP6V0A2, ATP6V0A4, ATP6V0B, ATP6V0C, ATP6V0D1, ATP6V0D2, ATP6V0E1, ATP6V0E2, ATP6V1A, ATP6V1B1, ATP6V1B2, ATP6V1C1, ATP6V1C2, ATP6V1D, ATP6V1E1, ATP6V1E2, ATP6V1F, ATP6V1G1, ATP6V1G2, ATP6V1G3, ATP6V1H, BAIAP2, BAIAP2L1, BAIAP2L2, BCAR1, C16542, C1QTNF12, C2CD5, CAPN10, CAV2, CCL2, CCND3, CDK4, CE…	FALSE
GO:0042102	GO_BiologicalProcess-GOA_23.02.2017_10h01	positive regulation of T cell proliferation	[6, 7, 8, 9]	[Group141, Group161]	7	6.73077	1.6121e-07	2.93401e-05	{Group141=5.055409846520685E-27, Group161=1.2972628010365007E-28}	{Group141=7.330344277454994E-25, Group161=1.945894201554751E-26}	[CD4, CD40LG, IFNG, IL1B, IL2, IL4, IL6]	[AGER, AIF1, ANXA1, BTNL2, C00870, C18200, C21orf33, CARD11, CCDC88B, CCL19, CCL5, CCR2, CD1D, CD24, CD244, CD274, CD276, CD28, CD3E, CD4, CD40LG, CD46, CD55, CD59, CD6, CD80, CD86, CORO1A, DEAF1, DHPS, DNAJA3, EBI3, EFNB1, EPO, EPX, FADD, FOXP3, GPAM, HAVCR2, HES1, HHLA2, HLA-A, HLA-DMB, HLA-DPA1, HLA-DPB1, HLA-E, HMGB1, ICOSLG, IFNG, IGF1, IGF2, IGFBP2, IL12A, IL12B, IL12RB1, IL15, IL18, IL1B, …	FALSE
GO:2000021	GO_BiologicalProcess-GOA_23.02.2017_10h01	regulation of ion homeostasis	[3, 4, 5, 6]	[Group075, Group154, Group160]	9	4.10959	1.76125e-07	3.15264e-05	{Group075=2.6908036920448136E-16, Group154=1.203528415039811E-23, Group160=2.095925753462619E-36}	{Group075=2.0719188428745066E-14, Group154=1.6006927920029487E-21, Group160=3.311562690470938E-34}	[BAX, BCL2, CALM1, CD4, CXCL10, CXCL11, PARP1, PRKCA, PRKCE]	[ABL1, ADCYAP1R1, ADORA1, ADORA2A, AGT, AGTR1, AGTR2, AGXT, AKAP6, ALOX12, ANK2, ANK3, AP3D1, APEX1, APP, ASPH, ATG5, ATP1A2, AVP, AVPR1A, AVPR2, B2M, BAK1, BAX, BBC3, BCL2, BDKRB1, BOK, C00746, C13662, C13705, C18200, CA2, CA7, CACNA1C, CACNA1G, CALCA, CALM1, CAMK2D, CAPN3, CASQ1, CASQ2, CATSPER4, CAV1, CAV3, CCK, CCL19, CCL21, CCL3, CCR5, CCR7, CD19, CD4, CEMIP, CFH, CHD7, CHERP, CLIC2, CLU, CO…	FALSE
GO:0071354	GO_BiologicalProcess-GOA_23.02.2017_10h01	cellular response to interleukin-6	[6]	[Group041, Group061, Group089, Group102, Group103, Group105, Group115, Group119, Group129, Group139, Group150, Group153, Group159, Group161]	5	14.7059	2.01403e-07	3.56482e-05	{Group041=1.01839353956105E-12, Group061=2.3024050426205298E-26, Group089=2.0657438308566865E-17, Group102=5.266614387496279E-16, Group103=4.578328693136612E-19, Group105=7.609187719694851E-20, Group115=5.1646959803579173E-14, Group119=1.6445864070363825E-16, Group129=5.489879487929511E-20, Group139=2.373309952007317E-19, Group150=6.47380039518465E-25, Group153=9.632572699614655E-25, Group159=2.3…	{Group041=4.175413512200305E-11, Group061=3.269415160521152E-24, Group089=1.838512009462451E-15, Group102=3.897294646747246E-14, Group103=4.7156785539307104E-17, Group105=8.370106491664335E-18, Group115=2.995523668607592E-12, Group119=1.2827773974883783E-14, Group129=6.0937662316017574E-18, Group139=2.5157085491277562E-17, Group150=8.998582549306663E-23, Group153=1.3196624598472077E-22, Group159=…	[CCL2, ICAM1, IL6, NFKB1, RELA]	[ABCC2, CAMP, CCL2, CFL1, CHAMP1, CTR9, FCAR, FER, FGF23, FGG, GAB1, GFI1, HAMP, ICAM1, IL6, IL6R, IL6ST, NFKB1, PHB, PID1, PIGU, PPARGC1A, PTGIS, PTPN2, RELA, SBNO2, SELPLG, SMAD4, ST3GAL6, STAT3, TDGF1, TDGF1P3, VPS72, ZCCHC11]	FALSE
GO:0002703	GO_BiologicalProcess-GOA_23.02.2017_10h01	regulation of leukocyte mediated immunity	[4, 5]	[Group138, Group141, Group145, Group148, Group151, Group161]	8	5	2.00631e-07	3.57124e-05	{Group138=2.2350029818032858E-20, Group141=5.055409846520685E-27, Group145=8.291268333444812E-26, Group148=7.862789791132838E-14, Group151=5.6806760749081155E-21, Group161=1.2972628010365007E-28}	{Group138=2.6149534887098442E-18, Group141=7.330344277454994E-25, Group145=1.1607775666822736E-23, Group148=4.2459064872117324E-12, Group151=6.930424811387901E-19, Group161=1.945894201554751E-26}	[HMOX1, IFNG, IL10, IL1B, IL2, IL4, IL6, TNF]	[ABR, ADORA2B, AGER, AP1G1, APLF, ARRB2, ATAD5, B2M, BCL6, BCR, BST2, BTK, C12orf4, C3, C4BPA, C4BPB, CADM1, CCR2, CD226, CD28, CD300A, CD40, CD84, CD96, CEACAM1, CLC, CLCF1, CLEC4G, CR1, CRK, CRTAM, DEAF1, DUSP22, EXOSC3, EXOSC6, F2RL1, FADD, FCER1A, FCER1G, FCER2, FER, FES, FGR, FOXF1, FOXJ1, FOXP3, FZD5, GAB2, GATA2, GATA3, HAVCR2, HFE, HLA-A, HLA-B, HLA-E, HMGB1, HMOX1, HPX, HSPD1, IFNA2, IFN…	FALSE
GO:0048015	GO_BiologicalProcess-GOA_23.02.2017_10h01	phosphatidylinositol-mediated signaling	[5, 6, 7]	[Group033, Group056, Group118, Group143]	9	4.03587	2.05372e-07	3.61455e-05	{Group033=2.356220841852683E-10, Group056=8.114071639618488E-17, Group118=4.905106245059882E-26, Group143=1.0304610897274216E-26}	{Group033=5.183685852075903E-9, Group056=6.734679460883345E-15, Group118=6.916199805534434E-24, Group143=1.4735593583102129E-24}	[CAT, EGFR, GRB2, IL6, MAPK1, MAPK3, PIK3CG, PIK3R1, TP53]	[AGAP2, AGO1, AGO2, AGO3, AGO4, AGT, AGXT, AKT1, ANGPT1, BECN1, BTC, C1QBP, C3orf58, CA8, CAT, CBL, CCL5, CD19, CD28, CD80, CD86, CEACAM1, CLSTN1, CRAT, CRYBA1, CSF1R, CSF3, DAB2IP, DCN, EDN1, EGF, EGFR, ENTPD5, ERBB2, ERBB3, ERBB4, EREG, EXOC1, EXOC7, EZR, F2, F2R, F2RL1, FBXL2, FGF1, FGF10, FGF13, FGF16, FGF17, FGF18, FGF19, FGF2, FGF20, FGF22, FGF23, FGF3, FGF4, FGF5, FGF6, FGF7, FGF8, FGF9, F…	FALSE
GO:0051928	GO_BiologicalProcess-GOA_23.02.2017_10h01	positive regulation of calcium ion transport	[4, 5, 6, 7, 8, 9, 10]	[Group068, Group154]	7	6.48148	2.09009e-07	3.63675e-05	{Group068=2.008691210230321E-18, Group154=1.203528415039811E-23}	{Group068=1.908256649718805E-16, Group154=1.6006927920029487E-21}	[BAX, CALM1, CCL2, CD4, CXCL10, CXCL11, G6PD]	[ABL1, ADCYAP1R1, AKAP6, ANK2, APEX1, ARRB2, ASPH, ATP1B1, ATP2B2, ATP2B4, ATP2C2, BAK1, BAX, BDKRB1, C16079, CACNA1D, CACNA2D1, CACNB2, CALM1, CAMK2A, CAPN3, CASK, CASR, CAV1, CCL2, CCL3, CCL4, CCL5, CCR1, CD19, CD4, CEMIP, CRACR2A, CREB3, CREB3L4, CRH, CXCL10, CXCL11, CXCL12, CXCL9, CXCR3, DRD1, EHD3, F2, F2R, F2RL3, FFAR1, FGF14, G6PD, GCG, GPER1, GRM6, GSTM2, GSTO1, HAP1, HCRT, HOMER1, HTT, I…	FALSE
GO:0010623	GO_BiologicalProcess-GOA_23.02.2017_10h01	programmed cell death involved in cell development	[4, 5, 6]	[Group054, Group111, Group136, Group152, Group160, Group161]	4	28.5714	2.08455e-07	3.64796e-05	{Group054=3.353524727928328E-13, Group111=1.595395626325167E-17, Group136=1.8509521382527809E-22, Group152=3.9478872628846304E-24, Group160=2.095925753462619E-36, Group161=1.2972628010365007E-28}	{Group054=1.542621374847031E-11, Group111=1.4358560636926502E-15, Group136=2.313690172815976E-20, Group152=5.329647804894251E-22, Group160=3.311562690470938E-34, Group161=1.945894201554751E-26}	[BAX, BCL2, IL1A, IL1B]	[BAX, BCL2, BHLHE23, CASP2, CASP5, CNTF, DNASE1L3, FASLG, IL1A, IL1B, KIT, KITLG, NTRK1, PRKDC]	FALSE
GO:0001844	GO_BiologicalProcess-GOA_23.02.2017_10h01	protein insertion into mitochondrial membrane involved in apoptotic signaling pathway	[4, 5, 6, 7, 8, 9, 10, 11]	[Group096, Group109, Group111, Group117, Group160, Group161]	5	14.2857	2.3426e-07	4.0527e-05	{Group096=5.896738035562535E-21, Group109=9.5049965209969E-19, Group111=1.595395626325167E-17, Group117=9.856959170040014E-12, Group160=2.095925753462619E-36, Group161=1.2972628010365007E-28}	{Group096=7.135053023030667E-19, Group109=9.219846625366993E-17, Group111=1.4358560636926502E-15, Group117=3.2527965261132046E-10, Group160=3.311562690470938E-34, Group161=1.945894201554751E-26}	[BAX, BCL2, CASP8, MAPK8, TP53]	[BAD, BAX, BBC3, BCL2, BCL2L11, BID, BMF, CASP8, DYNLL1, DYNLL2, E2F1, GZMB, MAPK8, MOAP1, NMT1, PMAIP1, PPP1R13B, PPP3CC, PPP3R1, REXO2, SFN, SH3GLB1, TFDP1, TFDP2, TP53, TP53BP1, TP53BP2, TP63, TP73, YWHAB, YWHAE, YWHAG, YWHAH, YWHAQ, YWHAZ]	FALSE
GO:0008630	GO_BiologicalProcess-GOA_23.02.2017_10h01	intrinsic apoptotic signaling pathway in response to DNA damage	[5, 6, 7, 8]	[Group122, Group128, Group136, Group160]	7	6.36364	2.37068e-07	4.07757e-05	{Group122=1.1159148140695808E-17, Group128=2.43620398361868E-20, Group136=1.8509521382527809E-22, Group160=2.095925753462619E-36}	{Group122=1.0154824808033186E-15, Group128=2.825996620997669E-18, Group136=2.313690172815976E-20, Group160=3.311562690470938E-34}	[BAX, BCL2L1, HMOX1, MCL1, PIK3R1, TNF, TP53]	[ABL1, ACKR3, AEN, AMH, ATAD5, ATM, BAD, BAG6, BAK1, BAX, BCL2L1, BCL2L11, BCL2L12, BCL3, BID, BRCA1, BRCA2, CASP2, CASP9, CCAR2, CD44, CD74, CDIP1, CDKN1A, CDKN2D, CHEK2, CIDEB, CLU, CNRIP1, CRIP1, CXCL12, DDIT4, DYRK2, E2F1, ELL3, EP300, EPHA2, ERCC6, FBXO18, FNIP2, HIC1, HIPK1, HIPK2, HMOX1, HNRNPK, HTRA2, IFI16, IKBKE, ING2, ING3, INGX, KDM1A, MAEL, MCL1, MIF, MLH1, MOAP1, MSH2, MSH6, MTCH2, …	FALSE
GO:0090279	GO_BiologicalProcess-GOA_23.02.2017_10h01	regulation of calcium ion import	[7, 8, 9, 10]	[Group075, Group154]	7	6.36364	2.37068e-07	4.07757e-05	{Group075=2.6908036920448136E-16, Group154=1.203528415039811E-23}	{Group075=2.0719188428745066E-14, Group154=1.6006927920029487E-21}	[BAX, CALM1, CCL2, CXCL10, CXCL11, PRKCA, PRKCE]	[ABL1, AKAP6, ANK2, APEX1, APP, ASPH, ATG5, ATP1A2, ATP2C2, BAX, BDKRB1, C16079, CACNA1C, CALM1, CAMK2D, CAPN3, CASK, CASQ1, CASQ2, CASR, CAV3, CCL2, CCL3, CD19, CEMIP, CHD7, CLIC2, CORO1A, CRH, CTNNB1, CXCL10, CXCL11, CXCL12, CXCL9, CXCR3, CYBA, DHRS7C, DIAPH1, DMD, DRD1, EGF, EPPIN, F2, F2R, F2RL3, FKBP1A, FKBP1B, FYN, GCG, GPER1, GRM6, GSTM2, GSTO1, HAP1, HOMER1, HRC, HTT, IL13, JPH1, JPH2, JP…	FALSE
GO:0002739	GO_BiologicalProcess-GOA_23.02.2017_10h01	regulation of cytokine secretion involved in immune response	[4, 5, 6, 7, 8, 9, 10, 11]	[Group074, Group091, Group124, Group147, Group157, Group161]	4	26.6667	2.83419e-07	4.81812e-05	{Group074=6.309205599136187E-19, Group091=1.9643660437894692E-20, Group124=7.279489626776259E-30, Group147=2.219335197191626E-28, Group157=6.014358351570216E-37, Group161=1.2972628010365007E-28}	{Group074=6.435389711118911E-17, Group091=2.3179519316715738E-18, Group124=1.1064824232699913E-27, Group147=3.306809443815523E-26, Group157=9.562829778996643E-35, Group161=1.945894201554751E-26}	[IL10, MAPK14, MAPK3, TNF]	[ANGPT1, APOA1, APOA2, ATG5, F2RL1, IL10, KARS, LILRB1, LPAL2, MAPK14, MAPK3, TNF, TNFRSF14, TRIM6, WNT5A]	FALSE
GO:0050864	GO_BiologicalProcess-GOA_23.02.2017_10h01	regulation of B cell activation	[5, 6, 7]	[Group131, Group134, Group138, Group161]	8	4.73373	3.05257e-07	5.09779e-05	{Group131=8.965170180080678E-17, Group134=5.416335777720201E-14, Group138=2.2350029818032858E-20, Group161=1.2972628010365007E-28}	{Group131=7.351439547666156E-15, Group134=3.0331480355233125E-12, Group138=2.6149534887098442E-18, Group161=1.945894201554751E-26}	[BCL2, CASP3, CD81, IFNG, IL10, IL2, IL4, IL6]	[ADA, AHR, AMH, APLF, ATAD5, ATM, ATP11C, BAD, BANK1, BCL2, BCL6, BTK, CARD11, CASP3, CD27, CD28, CD300A, CD38, CD40, CD74, CD81, CDKN1A, CDKN2A, CHRNB2, CLCF1, CTLA4, CYLD, EXOSC3, EXOSC6, FAS, FASN, FOXJ1, FOXP3, GPR183, ID2, IFNG, IGHA1, IGHA2, IGHD, IGHE, IGHG1, IGHG2, IGHG3, IGHG4, IGHM, IGHV1-18, IGHV1-24, IGHV1-3, IGHV1-45, IGHV1-58, IGHV1-69-2, IGHV1OR15-1, IGHV1OR15-9, IGHV2-26, IGHV2OR1…	FALSE
GO:0042698	GO_BiologicalProcess-GOA_23.02.2017_10h01	ovulation cycle	[2, 3, 4]	[Group060, Group088, Group095, Group158, Group160, Group161]	7	6.08696	3.21422e-07	5.30346e-05	{Group060=4.473753820840397E-19, Group088=8.18427208747288E-14, Group095=7.872064311268882E-19, Group158=2.1814444388913482E-30, Group160=2.095925753462619E-36, Group161=1.2972628010365007E-28}	{Group060=4.652703973674013E-17, Group088=4.337664206360627E-12, Group095=7.793343668156193E-17, Group158=3.3594244358926764E-28, Group160=3.311562690470938E-34, Group161=1.945894201554751E-26}	[BAX, BCL2, BCL2L1, EGFR, ICAM1, NOS3, SOD1]	[ADAMTS1, ADCYAP1, ADNP, AFP, AMH, ANG, ANXA1, ARRB1, ARRB2, ATM, AXL, BAX, BCL2, BCL2L1, BMP15, BMPR1B, C18201, CASP2, CEBPB, CLU, CTNNA1, DMC1, DMRTA1, EGFR, EGR1, EIF2B2, EIF2B4, EIF2B5, EREG, ESR1, ETS1, FANCF, FANCG, FOXC1, FOXL2, FOXO3, FSHB, FSHR, FZD4, GABRB1, GDF9, GNRH1, GPR149, HAS1, HAS2, HID1, ICAM1, IMMP2L, INHA, INHBA, INHBB, KISS1, KIT, KITLG, KMT2B, LEP, LFNG, LHCGR, MAP2K6, MMP1…	FALSE
GO:0032635	GO_BiologicalProcess-GOA_23.02.2017_10h01	interleukin-6 production	[4]	[Group110, Group141, Group148, Group152, Group161]	7	5.83333	4.29741e-07	7.00478e-05	{Group110=1.095475490592073E-21, Group141=5.055409846520685E-27, Group148=7.862789791132838E-14, Group152=3.9478872628846304E-24, Group161=1.2972628010365007E-28}	{Group110=1.3583896083341706E-19, Group141=7.330344277454994E-25, Group148=4.2459064872117324E-12, Group152=5.329647804894251E-22, Group161=1.945894201554751E-26}	[IFNG, IL10, IL1A, IL1B, IL6, NOS2, TNF]	[ADCYAP1, ADORA2B, AFAP1L2, AKIRIN2, ARHGEF2, ARRB1, ARRB2, ASH1L, AZI2, AZIN2, BANK1, BCL10, BPI, C1QTNF3, C5AR2, CARD9, CD36, CEBPB, CSK, CYBA, DDX58, EHHADH, EREG, F2R, F2RL1, FCER1G, FOXJ1, FOXP3, GAS6, GBA, GHRL, GHSR, HAVCR2, HGF, HLA-B, HMGB1, HSPD1, HYAL2, IFNG, IL10, IL17A, IL17F, IL17RC, IL19, IL1A, IL1B, IL1RAP, IL1RL2, IL33, IL36A, IL36B, IL36RN, IL6, IL6R, INPP5D, IRAK3, ISL1, KLF2, …	FALSE
GO:0014805	GO_BiologicalProcess-GOA_23.02.2017_10h01	smooth muscle adaptation	[3, 5]	[Group021, Group039, Group058, Group146, Group158, Group161]	3	60	5.7005e-07	9.12079e-05	{Group021=1.1086437902368568E-10, Group039=4.678066514792462E-16, Group058=1.7223391850378113E-12, Group146=5.380402153400938E-28, Group158=2.1814444388913482E-30, Group161=1.2972628010365007E-28}	{Group021=2.660745096568456E-9, Group039=3.5553305512422715E-14, Group058=6.889356740151245E-11, Group146=7.909191165499379E-26, Group158=3.3594244358926764E-28, Group161=1.945894201554751E-26}	[HMOX1, IL1B, NOS3]	[CYBA, HMOX1, IL1B, NANOS3, NOS3]	FALSE
GO:0046165	GO_BiologicalProcess-GOA_23.02.2017_10h01	alcohol biosynthetic process	[5]	[Group069, Group108, Group161]	7	5.6	5.67253e-07	9.13278e-05	{Group069=2.746894291012695E-12, Group108=1.0260577003899081E-11, Group161=1.2972628010365007E-28}	{Group069=9.888819447645703E-11, Group108=3.283384641247706E-10, Group161=1.945894201554751E-26}	[APOE, G6PD, IFNG, IL1B, NFKB1, SOD1, TNF]	[ABCG1, ACAA2, ACAT2, ACER1, ACER2, ACER3, ACLY, ADCYAP1R1, AKR1B1, APOA1, APOA4, APOA5, APOB, APOE, ARV1, C14orf1, C16051, C19897, CD244, CES1, CFTR, CNBP, CTDSP2, CYB5R3, CYP27B1, CYP2R1, CYP3A4, CYP51A1, DBH, DHCR24, DHCR7, DHDDS, DHX34, DHX8, EBP, ERLIN1, ERLIN2, FDFT1, FDPS, FGF1, FGF13, FGF2, G6PD, GBA, GFI1, GGPS1, GLB1, GOLT1A, GOLT1B, GOT1, GPER1, HMGCR, HMGCS1, HMGCS2, HRH1, HSD17B7, HS…	FALSE
GO:0045190	GO_BiologicalProcess-GOA_23.02.2017_10h01	isotype switching	[3, 4, 5, 6, 7, 8, 9, 10, 11, 12]	[Group126, Group134, Group137, Group138, Group151, Group161]	5	11.9048	6.01004e-07	9.55596e-05	{Group126=5.208615599587011E-13, Group134=5.416335777720201E-14, Group137=1.0770586316843705E-11, Group138=2.2350029818032858E-20, Group151=5.6806760749081155E-21, Group161=1.2972628010365007E-28}	{Group126=2.2397047078224147E-11, Group134=3.0331480355233125E-12, Group137=3.231175895053112E-10, Group138=2.6149534887098442E-18, Group151=6.930424811387901E-19, Group161=1.945894201554751E-26}	[CD40LG, IFNG, IL10, IL2, IL4]	[AICDA, APLF, ARTN, ATAD5, BATF, BCL6, CCR6, CD28, CD40, CD40LG, CLCF1, ERCC1, EXO1, EXOSC3, EXOSC6, FOXP3, HSPD1, IFNG, IL10, IL2, IL27RA, IL4, LIG4, MLH1, MSH2, MSH6, NBN, NDFIP1, NSD2, PAXIP1, RNF168, RNF8, STAT6, SUPT6H, SWAP70, TBX21, TFRC, TGFB1, THOC1, TNFSF13, TNFSF4, UNG]	FALSE
GO:1901030	GO_BiologicalProcess-GOA_23.02.2017_10h01	positive regulation of mitochondrial outer membrane permeabilization involved in apoptotic signaling pathway	[3, 4, 5, 6, 7, 8, 9, 10, 11, 12]	[Group096, Group109, Group111, Group117, Group160, Group161]	5	11.9048	6.01004e-07	9.55596e-05	{Group096=5.896738035562535E-21, Group109=9.5049965209969E-19, Group111=1.595395626325167E-17, Group117=9.856959170040014E-12, Group160=2.095925753462619E-36, Group161=1.2972628010365007E-28}	{Group096=7.135053023030667E-19, Group109=9.219846625366993E-17, Group111=1.4358560636926502E-15, Group117=3.2527965261132046E-10, Group160=3.311562690470938E-34, Group161=1.945894201554751E-26}	[BAX, BCL2, CASP8, MAPK8, TP53]	[ATPIF1, BAD, BAK1, BAX, BBC3, BCL2, BCL2L11, BID, BMF, BOK, CASP8, DYNLL1, DYNLL2, E2F1, GSK3A, GSK3B, GZMB, HIP1R, MAPK8, NMT1, PMAIP1, PPP1R13B, PPP3CC, PPP3R1, REXO2, SFN, SH3GLB1, SIVA1, TFDP1, TFDP2, TP53, TP53BP1, TP53BP2, TP63, TP73, YWHAB, YWHAE, YWHAG, YWHAH, YWHAQ, YWHAZ, ZNF205]	FALSE
GO:0030801	GO_BiologicalProcess-GOA_23.02.2017_10h01	positive regulation of cyclic nucleotide metabolic process	[6, 7, 8, 9, 10]	[Group035, Group146, Group154]	7	5.51181	6.31757e-07	9.91858e-05	{Group035=3.855205702182162E-15, Group146=5.380402153400938E-28, Group154=1.203528415039811E-23}	{Group035=2.5444357634402266E-13, Group146=7.909191165499379E-26, Group154=1.6006927920029487E-21}	[APOE, CALM1, CXCL10, CXCL11, NOS2, NOS3, PRKCA]	[ABCA1, ACR, ADCY1, ADCY2, ADCY3, ADCY4, ADCY5, ADCY6, ADCY7, ADCY8, ADCY9, ADCYAP1, ADCYAP1R1, ADGRD1, ADGRG6, ADM, ADNP, ADORA2A, ADORA2B, ADORA3, ADRB1, ADRB2, ADRB3, AKAP12, AKAP5, APOE, AVP, AVPR2, C13662, C16051, C16079, C16119, CACNA1A, CALCA, CALCR, CALCRL, CALM1, CAP1, CAP2, CHGA, CPAMD8, CRH, CRHR1, CXCL10, CXCL11, CXCL9, CXCR3, DRD1, DRD5, EDNRA, FLNB, FSHR, FZD2, GCG, GHRH, GHRHR, GIP…	FALSE
GO:1900407	GO_BiologicalProcess-GOA_23.02.2017_10h01	regulation of cellular response to oxidative stress	[4, 5, 6]	[Group107, Group121, Group155, Group156, Group158, Group160, Group161]	6	7.59494	6.36988e-07	9.93702e-05	{Group107=9.28476033582257E-18, Group121=8.591502166967616E-20, Group155=1.5800558011000385E-30, Group156=2.39789469623427E-30, Group158=2.1814444388913482E-30, Group160=2.095925753462619E-36, Group161=1.2972628010365007E-28}	{Group107=8.63482711231499E-16, Group121=9.278822340325026E-18, Group155=2.4490864917050597E-28, Group156=3.668778885238433E-28, Group158=3.3594244358926764E-28, Group160=3.311562690470938E-34, Group161=1.945894201554751E-26}	[HSPB1, IL6, MCL1, PARP1, SOD1, TNF]	[AKT1, ATF4, ATG7, BAG5, BMP7, CD36, CLU, CTNNB1, DHFR, ENDOG, FBLN5, FBXO7, FBXW7, FCAR, FOXO3, FUT8, FZD1, GCH1, GPR37, GPR37L1, GPX1, HDAC6, HGF, HIF1A, HSP90B2P, HSPB1, HSPH1, HTRA2, IL6, INS, LOC654780, LRRK2, MAPK7, MCL1, MET, MMP3, MTCH1, NFE2L2, NME5, NOL3, NONO, NOX1, NR4A3, NUP93, OXR1, P4HB, PARK7, PARP1, PAWR, PDE8A, PDIA2, PDILT, PINK1, PRKN, PSAP, PYCR1, RACK1, RGN, RIPK1, RNMT, SFP…	FALSE
GO:0071636	GO_BiologicalProcess-GOA_23.02.2017_10h01	positive regulation of transforming growth factor beta production	[4, 5, 6]	[Group055, Group142]	4	22.2222	6.29761e-07	9.95022e-05	{Group055=1.6001975949374276E-14, Group142=7.17431876360572E-19}	{Group055=1.0081244848105795E-12, Group142=7.174318763605721E-17}	[ATF2, CREB1, PTGS2, SMAD3]	[ATF2, ATP6AP2, CD34, CD46, CREB1, CX3CL1, FOXP3, GDNF, LGALS9, LUM, MYB, PTGS2, SERPINB7, SERPINF2, SMAD3, THBS1, WNT11, XCL1]	FALSE
GO:0071478	GO_BiologicalProcess-GOA_23.02.2017_10h01	cellular response to radiation	[4]	[Group065, Group120, Group128, Group160]	8	4.25532	6.86896e-07	0.000105782	{Group065=3.2052889103204567E-20, Group120=1.0480295495135786E-20, Group128=2.43620398361868E-20, Group160=2.095925753462619E-36}	{Group065=3.6860822468685255E-18, Group120=1.2471551639211586E-18, Group128=2.825996620997669E-18, Group160=3.311562690470938E-34}	[BAX, BCL2L1, CALM1, GRB2, MAPK14, PIK3R1, PTGS2, TP53]	[ACTR5, ADIRF, AKT2, ANTXR1, AQP1, ATF4, ATM, ATR, AURKB, BAK1, BAX, BCL2L1, BLM, BMF, CALM1, CAMKMT, CASP9, CCND2, CDC25A, CDKN1A, CERS1, CHEK1, CHEK2, CLOCK, CNGA1, CNGB1, CNRIP1, COPS9, CREBBP, CRIP1, CRY1, CRY2, CRYAB, CUL4B, CYBA, DDB1, DDB2, DMBT1, DNM2, ECT2, EEF1D, EGR1, EIF2AK4, EIF2S1, ELK1, EP300, ERCC1, ERCC4, FBXO4, FBXW7, FIGNL1, FMR1, FMR1-IT1, FNTA, FNTB, GADD45A, GATA3, GNAT1, GN…	FALSE
GO:0035821	GO_BiologicalProcess-GOA_23.02.2017_10h01	modification of morphology or physiology of other organism	[2, 3]	[Group050]	7	5.38462	7.40002e-07	0.00011322	{Group050=8.317822597433291E-20}	{Group050=9.066426631202287E-18}	[APOE, BCL2L1, CASP8, CD4, IFNG, NOS2, SMAD3]	[AKR1C1, ALB, ANXA2, APCS, APOE, APOL1, AQP1, ATG7, AZU1, BAD, BCL2L1, BCL2L11, C9, CAMP, CASP8, CAV2, CCL3, CCL4, CCL5, CCNK, CCNT1, CD209, CD4, CFL1, CHAMP1, CHD1, CHGA, CLEC4M, CPSF4, CTDP1, CTSG, DAG1, DAND5, DCD, DEFA1, DEFA1A3, DEFA3, DEFA4, DEFA5, DEFA6, EIF2AK2, EIF2AK4, ELANE, EP300, F2RL1, FBLN1, FCER2, FMR1, FMR1-IT1, GNLY, GSDMD, HAMP, HDAC1, HIPK2, HMGA2, HPN, HSPA8, HTN1, HTN3, HYAL…	FALSE
GO:0002702	GO_BiologicalProcess-GOA_23.02.2017_10h01	positive regulation of production of molecular mediator of immune response	[3, 4, 5, 6]	[Group086, Group091, Group131, Group143, Group147, Group157, Group161]	6	7.31707	7.95108e-07	0.000120856	{Group086=1.2095964201304352E-16, Group091=1.9643660437894692E-20, Group131=8.965170180080678E-17, Group143=1.0304610897274216E-26, Group147=2.219335197191626E-28, Group157=6.014358351570216E-37, Group161=1.2972628010365007E-28}	{Group086=9.676771361043482E-15, Group091=2.3179519316715738E-18, Group131=7.351439547666156E-15, Group143=1.4735593583102129E-24, Group147=3.306809443815523E-26, Group157=9.562829778996643E-35, Group161=1.945894201554751E-26}	[IFNG, IL2, IL4, IL6, MAPK14, MAPK3]	[AMH, ATAD5, B2M, BCL10, CD226, CD244, CD28, CD36, CD40, CD74, CLCF1, DEFB103A, EXOSC3, EXOSC6, F2RL1, FCER1G, FFAR2, FFAR3, FZD5, GATA3, GNPDA1, GPI, GPRC5B, HLA-A, HLA-E, HPX, IFNG, IL13, IL2, IL33, IL4, IL4R, IL5, IL6, KARS, KLK5, KLK7, MALT1, MAP3K7, MAPK14, MAPK3, MIF, MLH1, MSH2, MSH6, MZB1, NLRP3, NOD2, NR4A3, NSD2, PAXIP1, PGC, POLR2D, PRKCZ, PTPN22, RBP4, RNU6-664P, RSAD2, S100A8, S100A9…	FALSE
GO:0002889	GO_BiologicalProcess-GOA_23.02.2017_10h01	regulation of immunoglobulin mediated immune response	[7, 8]	[Group130, Group134, Group137, Group138, Group151, Group161]	5	10.8696	9.56811e-07	0.000143522	{Group130=8.72359720625284E-19, Group134=5.416335777720201E-14, Group137=1.0770586316843705E-11, Group138=2.2350029818032858E-20, Group151=5.6806760749081155E-21, Group161=1.2972628010365007E-28}	{Group130=8.549125262127783E-17, Group134=3.0331480355233125E-12, Group137=3.231175895053112E-10, Group138=2.6149534887098442E-18, Group151=6.930424811387901E-19, Group161=1.945894201554751E-26}	[IFNG, IL10, IL2, IL4, TNF]	[APLF, ATAD5, BCL6, BTK, C3, C4BPA, C4BPB, CD226, CD28, CD40, CLCF1, CR1, EXOSC3, EXOSC6, FCER1A, FCER1G, FCER2, FOXJ1, FOXP3, HPX, IFNG, IL10, IL2, IL27RA, IL4, LTA, MLH1, MSH2, MSH6, NDFIP1, NECTIN2, NSD2, PAXIP1, PTPN6, STAT6, SUPT6H, SUSD4, TBX21, TFRC, TGFB1, THOC1, TNF, TNFSF13, TNFSF4, UNG, XCL1]	FALSE
GO:0035729	GO_BiologicalProcess-GOA_23.02.2017_10h01	cellular response to hepatocyte growth factor stimulus	[6]	[Group100, Group115, Group129, Group145, Group159, Group161]	4	20	9.91259e-07	0.000147698	{Group100=1.4518138688106545E-11, Group115=5.1646959803579173E-14, Group129=5.489879487929511E-20, Group145=8.291268333444812E-26, Group159=2.3614833448420293E-33, Group161=1.2972628010365007E-28}	{Group100=4.0650788326698327E-10, Group115=2.995523668607592E-12, Group129=6.0937662316017574E-18, Group145=1.1607775666822736E-23, Group159=3.6839140179535657E-31, Group161=1.945894201554751E-26}	[CREB1, IL10, IL6, RELA]	[ADAMTS12, BCAR1, CASR, CREB1, GCLC, GCLM, GSK3B, HGF, IL10, IL6, MBD4, MED1, NELL1, NRP1, RELA, SIRT2, SOS1, TDGF1, TDGF1P3, VIL1]	FALSE
GO:0036473	GO_BiologicalProcess-GOA_23.02.2017_10h01	cell death in response to oxidative stress	[4, 5]	[Group090, Group092, Group107, Group121, Group133, Group155, Group158, Group160, Group161]	6	6.97674	1.05459e-06	0.000156079	{Group090=1.5479791277768595E-23, Group092=5.2205935367859703E-23, Group107=9.28476033582257E-18, Group121=8.591502166967616E-20, Group133=6.575467853059808E-19, Group155=1.5800558011000385E-30, Group158=2.1814444388913482E-30, Group160=2.095925753462619E-36, Group161=1.2972628010365007E-28}	{Group090=2.0433324486654544E-21, Group092=6.786771597821762E-21, Group107=8.63482711231499E-16, Group121=9.278822340325026E-18, Group133=6.641222531590407E-17, Group155=2.4490864917050597E-28, Group158=3.3594244358926764E-28, Group160=3.311562690470938E-34, Group161=1.945894201554751E-26}	[BCL2, HSPB1, IL6, MCL1, PARP1, SOD1]	[AKT1, ARL6IP5, ATF4, ATG7, BAG5, BCL2, CLU, CTNNB1, CYP1B1, DIABLO, ENDOG, FBXO7, FBXW7, FCAR, FOXO3, FZD1, GPR37, GPR37L1, GPX1, HDAC6, HGF, HIF1A, HSP90B2P, HSPB1, HSPH1, HTRA2, IL6, INS, JAK2, LOC654780, LRRK2, MAP3K5, MAPK7, MCL1, MELK, MET, MMP3, MTCH1, NFE2L2, NME5, NOL3, NONO, NOX1, NR4A3, NUP93, OXR1, P4HB, PARK7, PARP1, PAWR, PDCD10, PDE8A, PDIA2, PDILT, PDK1, PDPK1, PINK1, PML, PRKCD, …	FALSE
GO:0051023	GO_BiologicalProcess-GOA_23.02.2017_10h01	regulation of immunoglobulin secretion	[5, 6, 7, 8, 9, 10]	[Group140, Group147, Group153, Group156, Group161]	4	19.0476	1.22089e-06	0.000179471	{Group140=1.0731331045036508E-17, Group147=2.219335197191626E-28, Group153=9.632572699614655E-25, Group156=2.39789469623427E-30, Group161=1.2972628010365007E-28}	{Group140=9.872824561433587E-16, Group147=3.306809443815523E-26, Group153=1.3196624598472077E-22, Group156=3.668778885238433E-28, Group161=1.945894201554751E-26}	[CD40LG, IL2, IL6, TNF]	[CD40, CD40LG, GNPDA1, GPI, HLA-E, IL2, IL33, IL5, IL6, POLR2D, RBP4, STX4, TANK, TMBIM6, TNF, TNFRSF4, TNFSF4, TRAF2, TRAF6, XBP1, XBP1P1]	FALSE
GO:0043271	GO_BiologicalProcess-GOA_23.02.2017_10h01	negative regulation of ion transport	[3, 4, 5, 6]	[Group045, Group060, Group088, Group146, Group154, Group160]	7	4.96454	1.27972e-06	0.000186839	{Group045=3.066582739010323E-17, Group060=4.473753820840397E-19, Group088=8.18427208747288E-14, Group146=5.380402153400938E-28, Group154=1.203528415039811E-23, Group160=2.095925753462619E-36}	{Group045=2.667926982938981E-15, Group060=4.652703973674013E-17, Group088=4.337664206360627E-12, Group146=7.909191165499379E-26, Group154=1.6006927920029487E-21, Group160=3.311562690470938E-34}	[APOE, BCL2, CALM1, ICAM1, NOS3, PRKCE, PTGS2]	[ABAT, ACSL4, ACTN2, ADCYAP1, ADORA1, ADRA2A, AGT, AGTR2, AGXT, AKT1, AKT2, ANK3, ANO9, APOE, APP, ARL6IP5, ATF4, ATP1A2, ATP7A, BCL2, BEST3, C03958, C18200, CAB39, CALCA, CALM1, CAMK2D, CASQ2, CAV1, CAV3, CBARP, CHRFAM7A, CLIC2, CNR1, COMMD1, CRBN, CRHR1, CYP4F2, DRD2, DRD3, DRD4, EPO, EPPIN, EPX, FGF12, FKBP1B, FMR1, FMR1-IT1, GABRE, GNAO1, GNB5, GOPC, GPM6B, GPR35, GRM7, GSTM2, GSTO1, HAMP, HC…	FALSE
GO:0010524	GO_BiologicalProcess-GOA_23.02.2017_10h01	positive regulation of calcium ion transport into cytosol	[3, 4, 5, 6, 7, 8, 9, 10, 11, 12, 13, 14]	[Group028, Group068, Group075, Group154]	5	10	1.46116e-06	0.000210408	{Group028=2.469054413533442E-14, Group068=2.008691210230321E-18, Group075=2.6908036920448136E-16, Group154=1.203528415039811E-23}	{Group028=1.5308137363907342E-12, Group068=1.908256649718805E-16, Group075=2.0719188428745066E-14, Group154=1.6006927920029487E-21}	[BAX, CALM1, CD4, CXCL10, CXCL11]	[ABL1, ADCYAP1R1, AKAP6, APEX1, ASPH, BAK1, BAX, BDKRB1, CALM1, CAPN3, CAV1, CD19, CD4, CEMIP, CXCL10, CXCL11, CXCL9, CXCR3, DRD1, F2, F2R, F2RL3, GPER1, GSTM2, GSTO1, HAP1, HTT, IL13, JPH2, LACRT, NPSR1, NTSR1, P2RX2, P2RX3, P2RX4, P2RX5, P2RX7, PDPK1, PKD2, PLA2G1B, PLCG1, PRKD2, SLC6A4, SNCA, SRI, THY1, TRDN, TRPC1, TRPC3, XCL1]	FALSE
GO:0043524	GO_BiologicalProcess-GOA_23.02.2017_10h01	negative regulation of neuron apoptotic process	[5, 6, 7, 8]	[Group158, Group160]	7	4.72973	1.77097e-06	0.000253249	{Group158=2.1814444388913482E-30, Group160=2.095925753462619E-36}	{Group158=3.3594244358926764E-28, Group160=3.311562690470938E-34}	[APOE, BAX, BCL2, BCL2L1, CCL2, HMOX1, SOD1]	[AARS, ADAM8, ADNP, ADORA2A, AGAP2, ALKBH1, AMBRA1, ANGPT1, APOE, AXL, BARHL1, BAX, BCL2, BCL2L1, BDNF, BDNF-AS, BHLHB9, BIRC5, BOK, BRAF, BTG2, C1D, C5AR1, CACNA1A, CCL2, CEBPB, CHL1, CITED1, CLCF1, CLN3, CNTF, CNTFR, CORO1A, CPEB4, CRLF1, DDX11, DLX1, DNAJC5, DRAXIN, EN1, EN2, ERBB3, F2R, FAIM2, FAM134B, FAM58A, FGF20, FGF8, FOXB1, FYN, FZD9, GABRA5, GABRB2, GABRB3, GCLC, GCLM, GDF5, GDNF, GFRA…	FALSE
GO:0042542	GO_BiologicalProcess-GOA_23.02.2017_10h01	response to hydrogen peroxide	[4, 5]	[Group052, Group070, Group092, Group121, Group131, Group155, Group160, Group161]	7	4.66667	1.93727e-06	0.000275093	{Group052=5.019251775501425E-16, Group070=7.878512232929875E-18, Group092=5.2205935367859703E-23, Group121=8.591502166967616E-20, Group131=8.965170180080678E-17, Group155=1.5800558011000385E-30, Group160=2.095925753462619E-36, Group161=1.2972628010365007E-28}	{Group052=3.764438831626069E-14, Group070=7.405801498954083E-16, Group092=6.786771597821762E-21, Group121=9.278822340325026E-18, Group131=7.351439547666156E-15, Group155=2.4490864917050597E-28, Group160=3.311562690470938E-34, Group161=1.945894201554751E-26}	[BCL2, CASP3, CAT, HMOX1, IL6, RELA, SOD1]	[ABL1, ADA, ADAM9, AIFM1, AKR1B1, ANXA1, APEX1, APTX, AQP1, AREG, ARG1, AXL, BAD, BAK1, BCL2, BECN1, BNIP3, CASP3, CAT, CBX8, CDK1, CFL1, CLU, COL1A1, CRAT, CRK, CRYAB, CST3, CYP1B1, DLC1, DUSP1, DUSP12, ECT2, EEF2, ENDOG, ETS1, EZH2, FABP1, FAM58A, FBXO7, FKBP1B, FOSL1, FOXO1, FOXO3, FXN, GLRX2, GLYAT, GNAO1, GPR37, GPR37L1, GPX1, GUCY2C, HBA1, HBB, HDAC2, HDAC6, HGF, HMOX1, HP, HPR, HSF1, HSP90…	FALSE
GO:0050999	GO_BiologicalProcess-GOA_23.02.2017_10h01	regulation of nitric-oxide synthase activity	[5, 6]	[Group039, Group045, Group058, Group146, Group154, Group158, Group161]	5	9.43396	1.96117e-06	0.000276525	{Group039=4.678066514792462E-16, Group045=3.066582739010323E-17, Group058=1.7223391850378113E-12, Group146=5.380402153400938E-28, Group154=1.203528415039811E-23, Group158=2.1814444388913482E-30, Group161=1.2972628010365007E-28}	{Group039=3.5553305512422715E-14, Group045=2.667926982938981E-15, Group058=6.889356740151245E-11, Group146=7.909191165499379E-26, Group154=1.6006927920029487E-21, Group158=3.3594244358926764E-28, Group161=1.945894201554751E-26}	[APOE, CALM1, EGFR, IL1B, NOS3]	[ACVR2A, AGTR2, AKT1, APOE, ATP2B4, CALM1, CAV1, CAV3, CNR1, CNR2, CYGB, DDAH1, DDAH2, DHFR, DNM2, EGFR, ENG, ESR1, FCER2, GCH1, GCHFR, GLA, HIF1A, HSP90AA1, HTR2B, IL1B, INS, KRAS, LEP, LYPLA1, NANOS3, NAT8, NOD1, NOS1AP, NOS3, NOSIP, NOSTRIN, NPR3, NPRL3, PCDHA4, PCDHA6, PCDHA@, PRKG2, PTK2B, PTS, RNU1-93P, SCARB1, SPR, TACR1, TERF2, TERT, WASL, ZDHHC21]	FALSE
GO:0006919	GO_BiologicalProcess-GOA_23.02.2017_10h01	activation of cysteine-type endopeptidase activity involved in apoptotic process	[7, 8, 9, 10, 11, 12, 13]	[Group047, Group117, Group142, Group156, Group160, Group161]	6	6.25	2.01676e-06	0.000282346	{Group047=3.9053239828330067E-10, Group117=9.856959170040014E-12, Group142=7.17431876360572E-19, Group156=2.39789469623427E-30, Group160=2.095925753462619E-36, Group161=1.2972628010365007E-28}	{Group047=6.639050770816111E-9, Group117=3.2527965261132046E-10, Group142=7.174318763605721E-17, Group156=3.668778885238433E-28, Group160=3.311562690470938E-34, Group161=1.945894201554751E-26}	[BAX, CASP3, CASP8, PPARG, SMAD3, TNF]	[ACER2, AIFM1, ANP32B, APAF1, BAD, BAK1, BAX, BBC3, BCL2L10, BCL2L11, BCL2L13, BEX3, BID, BOK, CARD8, CASP1, CASP2, CASP3, CASP7, CASP8, CASP8AP2, CASP9, CCK, CDKN1B, CDKN2A, CNTN1, COL4A3, CRADD, CTSH, CYCS, DAP, DIABLO, DLC1, DLEC1, DNAJA3, DNPEP, DYNLL1, EGLN3, EIF2AK3, F2R, F3, FADD, FAM162A, FAS, FASLG, FASN, HIP1, HIP1R, HSPD1, HSPE1, IAPP, IFI27, IFT57, JAK2, LCK, MAPT, MTCH1, MUL1, NGF, N…	FALSE
GO:1901655	GO_BiologicalProcess-GOA_23.02.2017_10h01	cellular response to ketone	[5]	[Group079, Group087, Group089, Group103, Group129, Group156, Group159, Group161]	6	6.25	2.01676e-06	0.000282346	{Group079=8.893212916361293E-15, Group087=1.685885468660308E-13, Group089=2.0657438308566865E-17, Group103=4.578328693136612E-19, Group129=5.489879487929511E-20, Group156=2.39789469623427E-30, Group159=2.3614833448420293E-33, Group161=1.2972628010365007E-28}	{Group079=5.691656266471228E-13, Group087=8.26083879643551E-12, Group089=1.838512009462451E-15, Group103=4.7156785539307104E-17, Group129=6.0937662316017574E-18, Group156=3.668778885238433E-28, Group159=3.6839140179535657E-31, Group161=1.945894201554751E-26}	[CCL2, EGFR, ICAM1, IL6, PPARG, PRKCE]	[AACS, ABCB4, ABCC2, ACACA, ACOD1, ADCY1, ADCY2, ADCY3, ADCY5, ADCY6, ADCY8, AGTR2, AIFM1, AKAP8, AKR1B1, AKT1, AQP1, AR, AREG, ARG1, ATP2B1, C16079, CASP9, CBX3, CCL2, CDC5L, CFLAR, CRH, CXXC1, DCPS, DDIT4, DNMT3B, EFNA5, EGFR, EIF4E, EIF4EBP1, ELK1, EPHA5, ERRFI1, FAM58A, FBXO32, FDX1, FECH, FOXO1, FOXO3, GAS6, GJB2, GNAI1, GNAS, GNB1, GNG2, GUCY2C, ICAM1, IFNB1, IL6, KCNH4, KCNH8, KLF2, KLF4, …	FALSE
GO:0043525	GO_BiologicalProcess-GOA_23.02.2017_10h01	positive regulation of neuron apoptotic process	[5, 6, 7, 8]	[Group122, Group160, Group161]	5	9.25926	2.15477e-06	0.000297358	{Group122=1.1159148140695808E-17, Group160=2.095925753462619E-36, Group161=1.2972628010365007E-28}	{Group122=1.0154824808033186E-15, Group160=3.311562690470938E-34, Group161=1.945894201554751E-26}	[ATF2, BAX, CASP3, MCL1, TP53]	[AIFM1, ARHGEF7, ASCL1, ATF2, ATF4, ATM, BAX, BBC3, BCL2L11, CASP2, CASP3, CASP9, CCL3, CDC34, CDC42, CDK5, CDK5R1, CTNNB1, CTSZ, DDIT3, EPHA7, FASLG, FBXW7, FIS1, FOXO3, GDNF, GRIK2, GRIK5, HDAC4, ITGA1, JUN, MAP2K4, MAP3K11, MCL1, MYB, MYBL2, NF1, NQO1, NQO2, PAK3, PCSK9, PDZD2, PIN1, PITX3, PRKN, PRNP, RAPSN, SRPK2, TFAP2A, TFAP2B, TGFB2, TP53, TP53BP1, UBE2M]	FALSE
GO:0045672	GO_BiologicalProcess-GOA_23.02.2017_10h01	positive regulation of osteoclast differentiation	[6, 7, 8, 9, 10, 11, 12]	[Group130, Group161]	4	16.6667	2.14854e-06	0.000298646	{Group130=8.72359720625284E-19, Group161=1.2972628010365007E-28}	{Group130=8.549125262127783E-17, Group161=1.945894201554751E-26}	[CREB1, FOS, IFNG, TNF]	[ATP6AP1, CA2, CCR1, CREB1, CSF1, FOS, GNAS, GPR68, IFNG, IL12B, IL17A, IL20, IL23A, IL23R, KLF10, OCSTAMP, POU4F1, POU4F2, PPARGC1B, SLC9B2, TMEM64, TNF, TNFSF11, TRAF6]	FALSE
GO:0001889	GO_BiologicalProcess-GOA_23.02.2017_10h01	liver development	[4, 5, 6, 7]	[Group049, Group100, Group110, Group126, Group145, Group148, Group151, Group159, Group161]	7	4.51613	2.41107e-06	0.000327906	{Group049=5.259467498051892E-14, Group100=1.4518138688106545E-11, Group110=1.095475490592073E-21, Group126=5.208615599587011E-13, Group145=8.291268333444812E-26, Group148=7.862789791132838E-14, Group151=5.6806760749081155E-21, Group159=2.3614833448420293E-33, Group161=1.2972628010365007E-28}	{Group049=2.9978964738895782E-12, Group100=4.0650788326698327E-10, Group110=1.3583896083341706E-19, Group126=2.2397047078224147E-11, Group145=1.1607775666822736E-23, Group148=4.2459064872117324E-12, Group151=6.930424811387901E-19, Group159=3.6839140179535657E-31, Group161=1.945894201554751E-26}	[EGFR, HMOX1, IFNG, IL10, IL6, RELA, SMAD3]	[AACS, ACADM, ACAT1, ACO2, ACOD1, ADA, AK4, ALDH1A2, ANXA1, ARF6, ARG1, ARID5B, ASNS, ATP7A, AURKA, BAAT, C06643, C13055, C21orf33, CAD, CCDC39, CCDC40, CCND1, CEACAM1, CEBPA, CEBPB, CEBPG, CFLAR, CITED2, CLDN1, COBL, CPB2, CPS1, CSNK2A2, CSNK2B, CUL3, CYP1A1, CYP21A2, DBP, DDX39B, DFFB, DNAAF1, E2F7, E2F8, EGFR, EZH2, FBXW7, FPGS, FRZB, GATA6, GC, GFER, GLI1, GNPNAT1, HAMP, HES1, HFE, HGF, HHEX,…	FALSE
GO:0042990	GO_BiologicalProcess-GOA_23.02.2017_10h01	regulation of transcription factor import into nucleus	[7, 8, 9, 10, 11, 12, 13]	[Group142, Group148, Group156, Group161]	6	6	2.56172e-06	0.000340708	{Group142=7.17431876360572E-19, Group148=7.862789791132838E-14, Group156=2.39789469623427E-30, Group161=1.2972628010365007E-28}	{Group142=7.174318763605721E-17, Group148=4.2459064872117324E-12, Group156=3.668778885238433E-28, Group161=1.945894201554751E-26}	[IL10, IL1B, PIK3R1, PTGS2, SMAD3, TNF]	[AGTR2, AKAP6, BAG3, BCL3, BMP7, C1QTNF3, C8orf4, CCDC22, CCL19, CD27, CD36, CDH1, CHERP, CREB3, CREB3L4, CSF3, CYLD, DDX58, DMAP1, DYRK2, EDA, EDAR, FAF1, FBXW11, FLNA, FZR1, G3BP2, GREM1, GSK3B, HCLS1, HDAC3, IL10, IL12B, IL18R1, IL1B, IL23A, KEAP1, LACRT, LGALS9, LITAF, MAPK7, MAVS, MBTPS1, MDFI, MTOR, MXI1, NF1, NFKBIA, NFKBIE, NFKBIL1, NLRP12, NLRP3, NOL3, NOV, PIK3R1, PIK3R2, PKD1, PKD2, PL…	FALSE
GO:0032800	GO_BiologicalProcess-GOA_23.02.2017_10h01	receptor biosynthetic process	[5, 6]	[Group011, Group151, Group153, Group161]	4	16	2.55025e-06	0.000341734	{Group011=3.252980946800273E-10, Group151=5.6806760749081155E-21, Group153=9.632572699614655E-25, Group161=1.2972628010365007E-28}	{Group011=6.180663798920519E-9, Group151=6.930424811387901E-19, Group153=1.3196624598472077E-22, Group161=1.945894201554751E-26}	[ACE2, IL10, PPARG, TNF]	[ACE2, ACHE, ADIPOQ, ANKRD13C, CNPY2, EDN1, FGF21, FURIN, HDAC1, HDAC2, HDAC6, HIF1A, HNRNPK, HOXA5, IL10, ITGAV, ITGB3, NR1D1, NR1H3, PPARA, PPARG, SCAP, SEC24A, SH2D2A, TNF]	FALSE
GO:1900544	GO_BiologicalProcess-GOA_23.02.2017_10h01	positive regulation of purine nucleotide metabolic process	[6, 7, 8, 9, 10]	[Group035, Group146, Group154]	7	4.4586	2.62593e-06	0.000346623	{Group035=3.855205702182162E-15, Group146=5.380402153400938E-28, Group154=1.203528415039811E-23}	{Group035=2.5444357634402266E-13, Group146=7.909191165499379E-26, Group154=1.6006927920029487E-21}	[APOE, CALM1, CXCL10, CXCL11, NOS2, NOS3, PRKCA]	[ABCA1, ACR, ACTN3, ADCY1, ADCY2, ADCY3, ADCY4, ADCY5, ADCY6, ADCY7, ADCY8, ADCY9, ADCYAP1, ADCYAP1R1, ADGRD1, ADGRG6, ADM, ADNP, ADORA2A, ADORA2B, ADORA3, ADRB1, ADRB2, ADRB3, AKAP12, AKAP5, APOE, ARNT, AVP, AVPR2, C13662, C16051, C16079, C16119, CACNA1A, CALCA, CALCR, CALCRL, CALM1, CAP1, CAP2, CCNB1, CDK1, CHGA, CPAMD8, CRH, CRHR1, CXCL10, CXCL11, CXCL9, CXCR3, DRD1, DRD5, EDNRA, ENO1, ENTPD5,…	FALSE
GO:0071398	GO_BiologicalProcess-GOA_23.02.2017_10h01	cellular response to fatty acid	[5, 6]	[Group023, Group055, Group057, Group076, Group079, Group089, Group159, Group161]	5	8.77193	2.82714e-06	0.000367528	{Group023=1.3370853332271275E-11, Group055=1.6001975949374276E-14, Group057=4.253617063750937E-13, Group076=5.586511777497201E-15, Group079=8.893212916361293E-15, Group089=2.0657438308566865E-17, Group159=2.3614833448420293E-33, Group161=1.2972628010365007E-28}	{Group023=3.87754746635867E-10, Group055=1.0081244848105795E-12, Group057=1.8715915080504124E-11, Group076=3.631232655373181E-13, Group079=5.691656266471228E-13, Group089=1.838512009462451E-15, Group159=3.6839140179535657E-31, Group161=1.945894201554751E-26}	[CCL2, CDK4, CREB1, PPARG, PRKCE]	[ACACA, ADCY6, AKAP8, AKR1C2, AKR1C3, AKT1, APOB, CCL2, CCNB1, CDK4, CLDN1, CPS1, CPT1A, CREB1, CYP21A2, DGAT2, E2F1, EDN1, FFAR2, FFAR3, GNAS, GNB1, GNG2, ID3, KCNK4, LDLR, NFATC4, NME2, NR1H4, OR51E2, P2RY4, P2RY6, PDK3, PDK4, PID1, PPARG, PPARGC1A, PRKAA1, PRKAA2, PRKCE, PTAFR, PTGDR, PTGER2, PTGER4, PTGFR, RANBP1, SFRP1, SMARCD1, SRC, SREBF1, TNC, TNFSF4, TNNC1, UCP1, XRCC5, ZC3H12A, ZNF683]	FALSE
GO:0090280	GO_BiologicalProcess-GOA_23.02.2017_10h01	positive regulation of calcium ion import	[5, 6, 7, 8, 9, 10, 11]	[Group068, Group150, Group154, Group160]	5	8.77193	2.82714e-06	0.000367528	{Group068=2.008691210230321E-18, Group150=6.47380039518465E-25, Group154=1.203528415039811E-23, Group160=2.095925753462619E-36}	{Group068=1.908256649718805E-16, Group150=8.998582549306663E-23, Group154=1.6006927920029487E-21, Group160=3.311562690470938E-34}	[BAX, CALM1, CCL2, CXCL10, CXCL11]	[ABL1, AKAP6, APEX1, ASPH, ATP2C2, BAX, BDKRB1, C16079, CALM1, CAPN3, CASK, CASR, CCL2, CCL3, CD19, CEMIP, CRH, CXCL10, CXCL11, CXCL12, CXCL9, CXCR3, DRD1, F2, F2R, F2RL3, GCG, GPER1, GRM6, GSTM2, GSTO1, HAP1, HTT, IL13, JPH2, LACRT, LGALS3, NPSR1, NTSR1, PDGFB, PDGFRB, PDPK1, PKD2, PLCG1, PRKD2, SLC6A4, SNCA, SRI, STC1, THY1, TRDN, TRPC1, TRPV2, TRPV3, UCN, XCL1, ZP3]	FALSE
GO:0006953	GO_BiologicalProcess-GOA_23.02.2017_10h01	acute-phase response	[6]	[Group051, Group054, Group086, Group099, Group111, Group136, Group142, Group152, Group153, Group156, Group160, Group161]	5	8.62069	3.08451e-06	0.000397902	{Group051=6.726258273302631E-25, Group054=3.353524727928328E-13, Group086=1.2095964201304352E-16, Group099=5.555412196230995E-16, Group111=1.595395626325167E-17, Group136=1.8509521382527809E-22, Group142=7.17431876360572E-19, Group152=3.9478872628846304E-24, Group153=9.632572699614655E-25, Group156=2.39789469623427E-30, Group160=2.095925753462619E-36, Group161=1.2972628010365007E-28}	{Group051=9.28223641715763E-23, Group054=1.542621374847031E-11, Group086=9.676771361043482E-15, Group099=4.055450903248627E-14, Group111=1.4358560636926502E-15, Group136=2.313690172815976E-20, Group142=7.174318763605721E-17, Group152=5.329647804894251E-22, Group153=1.3196624598472077E-22, Group156=3.668778885238433E-28, Group160=3.311562690470938E-34, Group161=1.945894201554751E-26}	[IL1A, IL1B, IL6, PTGS2, TNF]	[AHSG, APCS, APOL2, C18200, CD163, CEBPB, CNR1, CRP, CSRP1, DLC1, EDNRB, EHHADH, EPO, EPX, F2, F8, FN1, HAMP, HFE, HP, HPR, IL1A, IL1B, IL1RN, IL22, IL6, IL6R, INS, ITIH4, LBP, MBL2, MRGPRX1, ORM1, ORM2, PCDHA4, PCDHA@, PLSCR1, PPIAP10, PTGER3, PTGS2, REG3A, REG3G, RPSA, SAA1, SAA2, SAA4, SERPINA1, SERPINA3, SERPINF2, SIGIRR, STAT3, TFR2, TIMP1, TNF, TNFRSF11A, TNFSF11, TRPV1, UGT1A1]	FALSE
GO:0045075	GO_BiologicalProcess-GOA_23.02.2017_10h01	regulation of interleukin-12 biosynthetic process	[5, 6, 7, 8]	[Group102, Group119, Group126, Group139, Group159, Group161]	3	37.5	3.16549e-06	0.000405183	{Group102=5.266614387496279E-16, Group119=1.6445864070363825E-16, Group126=5.208615599587011E-13, Group139=2.373309952007317E-19, Group159=2.3614833448420293E-33, Group161=1.2972628010365007E-28}	{Group102=3.897294646747246E-14, Group119=1.2827773974883783E-14, Group126=2.2397047078224147E-11, Group139=2.5157085491277562E-17, Group159=3.6839140179535657E-31, Group161=1.945894201554751E-26}	[IFNG, NFKB1, RELA]	[IFNG, IRF1, LTB, MAST2, NFKB1, RELA, TLR4, TRAF6]	FALSE
GO:0071316	GO_BiologicalProcess-GOA_23.02.2017_10h01	cellular response to nicotine	[6, 7]	[Group070, Group102, Group105, Group119, Group126, Group139, Group153, Group158, Group159, Group161]	3	37.5	3.16549e-06	0.000405183	{Group070=7.878512232929875E-18, Group102=5.266614387496279E-16, Group105=7.609187719694851E-20, Group119=1.6445864070363825E-16, Group126=5.208615599587011E-13, Group139=2.373309952007317E-19, Group153=9.632572699614655E-25, Group158=2.1814444388913482E-30, Group159=2.3614833448420293E-33, Group161=1.2972628010365007E-28}	{Group070=7.405801498954083E-16, Group102=3.897294646747246E-14, Group105=8.370106491664335E-18, Group119=1.2827773974883783E-14, Group126=2.2397047078224147E-11, Group139=2.5157085491277562E-17, Group153=1.3196624598472077E-22, Group158=3.3594244358926764E-28, Group159=3.6839140179535657E-31, Group161=1.945894201554751E-26}	[NFKB1, RELA, TNF]	[BAD, KCNJ11, MSX1, NFKB1, NTRK1, RELA, TH, TNF]	FALSE
GO:1904427	GO_BiologicalProcess-GOA_23.02.2017_10h01	positive regulation of calcium ion transmembrane transport	[5, 6, 7, 8, 9, 10, 11]	[Group068, Group154]	5	8.47458	3.35995e-06	0.000423354	{Group068=2.008691210230321E-18, Group154=1.203528415039811E-23}	{Group068=1.908256649718805E-16, Group154=1.6006927920029487E-21}	[BAX, CALM1, CXCL10, CXCL11, G6PD]	[ABL1, AKAP6, ANK2, APEX1, ASPH, ATP1B1, BAX, BDKRB1, CACNA2D1, CACNB2, CALM1, CAPN3, CD19, CEMIP, CRACR2A, CXCL10, CXCL11, CXCL9, CXCR3, DRD1, EHD3, F2, F2R, F2RL3, FGF14, G6PD, GPER1, GSTM2, GSTO1, HAP1, HTT, IL13, JPH2, KCNE2, KCNE3, LACRT, NPSR1, NTSR1, PDPK1, PKD2, PLCG1, PLCG2, PRKD2, RGN, RYR2, S100A1, SLC6A4, SLC9A1, SNCA, SRI, STIM1, STIM2, SUMO1, THY1, TMEM110, TRDN, TRPC1, UBL4A, XCL1]	FALSE
GO:0048771	GO_BiologicalProcess-GOA_23.02.2017_10h01	tissue remodeling	[3]	[Group019, Group024, Group140, Group161]	7	4.26829	3.50821e-06	0.000438527	{Group019=3.490201866799155E-10, Group024=1.0110325961232061E-7, Group140=1.0731331045036508E-17, Group161=1.2972628010365007E-28}	{Group019=6.28236336023848E-9, Group024=5.05516298061603E-7, Group140=9.872824561433587E-16, Group161=1.945894201554751E-26}	[ACE, BAX, EGFR, IL1A, IL2, IL6, NOS3]	[ABR, ACD, ACE, ACVR2B, ACVRL1, ADAM8, ADRB2, AGER, AGT, AGTR2, AGXT, ANXA1, ARG1, ATG5, ATP6AP1, ATP7A, AXL, B4GALT1, BAK1, BAX, BCR, BGLAP, BGN, BMPR2, BSX, BTF3P11, C16051, C19897, CA2, CALCA, CAPN1, CARTPT, CAV1, CCR2, CD38, CEACAM1, CEL, CELA1, CHD7, CLDN18, CSF1R, CSK, CSPG4, CST3, CTHRC1, CTNNB1, CTSK, CXXC1, CYP27B1, DBH, DCSTAMP, DLL4, EFNA2, EGFR, ELF3, EPAS1, EPHA2, ERG, F2R, FGF10, FG…	FALSE
GO:0031330	GO_BiologicalProcess-GOA_23.02.2017_10h01	negative regulation of cellular catabolic process	[4, 5, 6]	[Group090, Group110, Group121, Group160, Group161]	7	4.21687	3.80146e-06	0.00046758	{Group090=1.5479791277768595E-23, Group110=1.095475490592073E-21, Group121=8.591502166967616E-20, Group160=2.095925753462619E-36, Group161=1.2972628010365007E-28}	{Group090=2.0433324486654544E-21, Group110=1.3583896083341706E-19, Group121=9.278822340325026E-18, Group160=3.311562690470938E-34, Group161=1.945894201554751E-26}	[BCL2, BCL2L1, HMOX1, IL10, IL6, MCL1, PIK3CG]	[ACACB, AKT1, ALAD, ANXA2, APOC1, APOC3, ATG7, ATP13A2, ATP2B4, ATRAID, BAG5, BAG6, BCL2, BCL2L1, BMF, CCAR2, CDK5RAP3, CDKN2A, CHMP4A, CHMP4B, CLEC16A, CNR1, CST3, CTSA, DAB2IP, DAP, DAPL1, DFFA, DHX34, DLC1, DNPEP, EGLN1, EHMT2, EIF4G1, EIF4G2, ETFBKMT, FEZ1, FEZ2, FHIT, FMR1, FMR1-IT1, FURIN, GABARAPL2, GATA4, GIPC1, GOLGA2, GPLD1, GSK3A, HERC1, HFE, HGF, HMOX1, HP, HPR, HSP90AB1, HTR2B, IAPP,…	FALSE
GO:0050994	GO_BiologicalProcess-GOA_23.02.2017_10h01	regulation of lipid catabolic process	[4, 5, 6]	[Group069, Group161]	5	8.19672	3.96863e-06	0.000484172	{Group069=2.746894291012695E-12, Group161=1.2972628010365007E-28}	{Group069=9.888819447645703E-11, Group161=1.945894201554751E-26}	[CDK4, IL1B, PIK3CG, PRKCE, TNF]	[AADAC, ABCD2, ABHD5, ACACB, ADORA1, ADRA2A, ADRB2, AKT1, AKT2, ANGPTL3, APOA1, APOA2, APOA4, APOA5, APOC1, APOC2, APOC3, BSCL2, CDK4, CIDEA, CNR1, CPT1A, CRTC3, ETFBKMT, FABP1, FGF21, FMC1, GPLD1, GRIP1, HCAR2, HTT, IDH1, IL1B, INS, IRS1, IRS2, LDLR, LGALS12, LONP2, LPAL2, MTOR, NCOA2, PCDHA4, PCDHA@, PDE3B, PIK3CG, PLIN5, PNPLA2, PPARA, PRKAA1, PRKCD, PRKCE, RARRES2, SCARB1, SLC6A4, SPTLC1, SPT…	FALSE
GO:0097755	GO_BiologicalProcess-GOA_23.02.2017_10h01	positive regulation of blood vessel diameter	[7]	[Group039, Group088, Group108, Group146, Group155, Group158, Group159, Group160, Group161]	5	8.06452	4.30373e-06	0.000520752	{Group039=4.678066514792462E-16, Group088=8.18427208747288E-14, Group108=1.0260577003899081E-11, Group146=5.380402153400938E-28, Group155=1.5800558011000385E-30, Group158=2.1814444388913482E-30, Group159=2.3614833448420293E-33, Group160=2.095925753462619E-36, Group161=1.2972628010365007E-28}	{Group039=3.5553305512422715E-14, Group088=4.337664206360627E-12, Group108=3.283384641247706E-10, Group146=7.909191165499379E-26, Group155=2.4490864917050597E-28, Group158=3.3594244358926764E-28, Group159=3.6839140179535657E-31, Group160=3.311562690470938E-34, Group161=1.945894201554751E-26}	[APOE, EGFR, HMOX1, NOS3, SOD1]	[ADCYAP1, ADM, ADORA1, ADORA2A, ADORA2B, ADRB1, ADRB2, ADRB3, AGT, AGTR2, AGXT, ALOX12, APLN, APOE, ARHGAP42, ATG5, BBS2, BDKRB1, BDKRB2, BMPR2, CALCA, CASR, CPS1, CYP21A2, DOCK4, DOCK5, DRD1, EDNRB, EGFR, EPHX2, F2RL1, GCH1, GJA1, GJA5, GPER1, GPX1, GUCY1A3, HMOX1, INS, ITGA1, KCNJ8, KCNMB1, KNG1, LEP, MKKS, NANOS1, NANOS3, NOS1, NOS3, NPPC, PLA2G6, PLOD3, PPARD, PRKG1, PTAFR, PTPRM, RGS2, SCPEP…	FALSE
GO:0045348	GO_BiologicalProcess-GOA_23.02.2017_10h01	positive regulation of MHC class II biosynthetic process	[5, 6, 7]	[Group098, Group126, Group134, Group135, Group148, Group151, Group161]	3	33.3333	4.73492e-06	0.000558721	{Group098=1.7727505368998016E-13, Group126=5.208615599587011E-13, Group134=5.416335777720201E-14, Group135=2.6641611867720388E-12, Group148=7.862789791132838E-14, Group151=5.6806760749081155E-21, Group161=1.2972628010365007E-28}	{Group098=8.509202577119047E-12, Group126=2.2397047078224147E-11, Group134=3.0331480355233125E-12, Group135=9.857396391056543E-11, Group148=4.2459064872117324E-12, Group151=6.930424811387901E-19, Group161=1.945894201554751E-26}	[IFNG, IL10, IL4]	[AZU1, CIITA, IFNG, IL10, IL4, SIRT1, TLR4, XBP1, XBP1P1]	FALSE
GO:0006801	GO_BiologicalProcess-GOA_23.02.2017_10h01	superoxide metabolic process	[4]	[Group146, Group155, Group156, Group158, Group160, Group161]	5	7.93651	4.66065e-06	0.000559278	{Group146=5.380402153400938E-28, Group155=1.5800558011000385E-30, Group156=2.39789469623427E-30, Group158=2.1814444388913482E-30, Group160=2.095925753462619E-36, Group161=1.2972628010365007E-28}	{Group146=7.909191165499379E-26, Group155=2.4490864917050597E-28, Group156=3.668778885238433E-28, Group158=3.3594244358926764E-28, Group160=3.311562690470938E-34, Group161=1.945894201554751E-26}	[EGFR, NOS2, NOS3, SOD1, TNF]	[AATF, AGT, AGXT, AIFM2, ALOX12, APOA4, ATP7A, BMP7, BST1, CCS, CD36, CRP, CSRP1, CYB5R4, CYBA, CYBB, DHFR, DUOX1, EDN1, EGFR, F2RL1, FBLN5, GCH1, GSTP1, IMMP2L, MAPT, MPO, MT3, NANOS2, NANOS3, NCF1, NCF1B, NCF1C, NCF2, NFE2L2, NOS2, NOS3, NOX1, NOX3, NOX4, NOX5, NOXA1, NOXO1, NQO1, NRROS, PARK7, PON3, PPIAP10, PRDX1, PRDX2, PREX1, PRG3, PRKCD, RGN, SH3PXD2A, SH3PXD2B, SOD1, SOD2, SOD3, SYK, SZT2…	FALSE
GO:0046688	GO_BiologicalProcess-GOA_23.02.2017_10h01	response to copper ion	[5]	[Group012, Group029, Group103, Group127]	4	13.7931	4.73212e-06	0.000563123	{Group012=8.013288701897547E-9, Group029=1.537248125048842E-10, Group103=4.578328693136612E-19, Group127=9.796760338000124E-17}	{Group012=9.615946442277057E-8, Group029=3.535670687612336E-9, Group103=4.7156785539307104E-17, Group127=7.9353758737801E-15}	[ICAM1, IL1A, PTGS1, SOD1]	[AANAT, AOC1, AQP1, AQP2, ATP5D, ATP7A, ATP7B, BECN1, CDK1, COX1, CYP1A1, CYP1A2, DAXX, HSF1, ICAM1, IL1A, LOXL2, MAP1LC3A, MT1G, MYCBP2, PAM, PARK7, PRNP, PTGS1, S100A13, SNCA, SOD1, SOD3, SORD]	FALSE
GO:0042531	GO_BiologicalProcess-GOA_23.02.2017_10h01	positive regulation of tyrosine phosphorylation of STAT protein	[7, 8, 9, 10, 11, 12]	[Group138, Group140, Group161]	5	7.8125	5.04037e-06	0.000589724	{Group138=2.2350029818032858E-20, Group140=1.0731331045036508E-17, Group161=1.2972628010365007E-28}	{Group138=2.6149534887098442E-18, Group140=9.872824561433587E-16, Group161=1.945894201554751E-26}	[CSF2, IFNG, IL2, IL4, IL6]	[ARL2BP, C18200, C21orf33, CCL5, CCM2, CD40, CLCF1, CNTF, CRLF1, CSF1R, CSF2, CTF1, EPO, EPX, ERBB4, FGFR3, FLT3, FYN, GH1, GHR, HCLS1, HDAC2, HES1, HES5, HPX, HSF1, IFNA2, IFNG, IFNL1, IGF1, IL12A, IL12B, IL13, IL15, IL18, IL2, IL20, IL21, IL23A, IL23R, IL24, IL3, IL31RA, IL4, IL6, IL6R, IL6ST, ISL1, JAK2, KIT, LEP, LIF, LYN, OSM, PECAM1, PIBF1, PTK6, SOCS3, STAP2, STAT3, TIMP1, TNFRSF18, TNFRSF…	FALSE
GO:0070228	GO_BiologicalProcess-GOA_23.02.2017_10h01	regulation of lymphocyte apoptotic process	[7, 8]	[Group137, Group140, Group160, Group161]	5	7.8125	5.04037e-06	0.000589724	{Group137=1.0770586316843705E-11, Group140=1.0731331045036508E-17, Group160=2.095925753462619E-36, Group161=1.2972628010365007E-28}	{Group137=3.231175895053112E-10, Group140=9.872824561433587E-16, Group160=3.311562690470938E-34, Group161=1.945894201554751E-26}	[BAX, ICAM1, IL10, IL2, TP53]	[ADA, ADAM8, AMH, AURKB, BAX, BBC3, BCL10, BCL6, BIRC7, BMP4, BPNT1, BTK, CCL5, CD27, CD274, CD3G, CD74, DOCK8, EFNA1, FADD, FAS, FASN, FNIP1, FOXP1, GIMAP8, GPAM, HIF1A, HSH2D, ICAM1, IDO1, IL10, IL2, IRS2, JAK3, LGALS13, LGALS14, LGALS16, LGALS3, LGALS9, LYN, MIF, NFKBID, NOC2L, P2RX7, PDCD1, PIP, PRELID1, PRKCQ, PTEN, RAG1, RIPK3, RORC, S100A8, S100A9, SLC39A10, SLC46A2, TARP, TGFB2, TP53, TP5…	FALSE
GO:0001836	GO_BiologicalProcess-GOA_23.02.2017_10h01	release of cytochrome c from mitochondria	[4, 5, 6, 7]	[Group090, Group111, Group120, Group128, Group133, Group136, Group140, Group160, Group161]	5	7.69231	5.44394e-06	0.000631497	{Group090=1.5479791277768595E-23, Group111=1.595395626325167E-17, Group120=1.0480295495135786E-20, Group128=2.43620398361868E-20, Group133=6.575467853059808E-19, Group136=1.8509521382527809E-22, Group140=1.0731331045036508E-17, Group160=2.095925753462619E-36, Group161=1.2972628010365007E-28}	{Group090=2.0433324486654544E-21, Group111=1.4358560636926502E-15, Group120=1.2471551639211586E-18, Group128=2.825996620997669E-18, Group133=6.641222531590407E-17, Group136=2.313690172815976E-20, Group140=9.872824561433587E-16, Group160=3.311562690470938E-34, Group161=1.945894201554751E-26}	[BAX, BCL2, BCL2L1, IL6, TP53]	[AKT1, APOPT1, ARRB2, AVP, BAD, BAK1, BAX, BBC3, BCL2, BCL2L1, BCL2L11, BID, BIK, BMF, BNIP3, BOK, C13662, CCK, CIDEB, CLU, DNM1L, FAM162A, FIS1, FXN, FZD9, GGCT, GPER1, GPX1, HGF, HRK, IFI6, IFNAR1, IGF1, IL6, JUN, LMNA, MED12, MFF, MLLT11, MMP9, MOAP1, NLRP3, NOL3, OPA1, PDCD5, PINK1, PLA2G6, PLAUR, PMAIP1, PPIF, PRELID1, PRKN, PSMD10, PYCARD, REXO2, RIPK2, SFN, SOD2, SOS1, TIMM50, TNFSF10, TP5…	FALSE
GO:0018107	GO_BiologicalProcess-GOA_23.02.2017_10h01	peptidyl-threonine phosphorylation	[7, 8, 9]	[Group018, Group035, Group062, Group078]	6	5.17241	6.07192e-06	0.000698271	{Group018=5.1128769996314335E-12, Group035=3.855205702182162E-15, Group062=4.359779768241478E-20, Group078=9.848377456993859E-21}	{Group018=1.7895069498710018E-10, Group035=2.5444357634402266E-13, Group062=4.970148935795285E-18, Group078=1.1818052948392632E-18}	[BCL2, CALM1, MAPK1, MAPK8, PRKCA, PRKCB]	[ACOD1, ACVR1, ACVR1B, AKT1, AXIN1, AZU1, BCL2, BMP7, CAB39, CAD, CALM1, CAMK1, CAMK1D, CAMK1G, CAMK2A, CAMK2B, CAMK2D, CAMK2G, CAMKK1, CAMKK2, CAMKV, CDK1, CDK5, CDK5R1, CEMIP, CHEK1, CHEK2, CHI3L1, CLK1, COLEC11, COQ7, CSNK2A1, CSNK2A2, CSNK2B, DAPK2, DAPK3, DCAF1, DCLK1, DCLK2, DCLK3, DDIT4, DFFB, DGKQ, DMTN, DYRK1A, EGF, EIF4G1, GCG, GPI, GRK2, GSG2, GSK3B, HIPK2, HIPK3, INPP5K, LMTK2, LRRK2,…	FALSE
GO:0045940	GO_BiologicalProcess-GOA_23.02.2017_10h01	positive regulation of steroid metabolic process	[4, 5, 6, 7]	[Group114, Group130, Group141, Group146, Group148, Group161]	4	12.9032	6.23223e-06	0.000710474	{Group114=2.1225869765692824E-15, Group130=8.72359720625284E-19, Group141=5.055409846520685E-27, Group146=5.380402153400938E-28, Group148=7.862789791132838E-14, Group161=1.2972628010365007E-28}	{Group114=1.4645850138328048E-13, Group130=8.549125262127783E-17, Group141=7.330344277454994E-25, Group146=7.909191165499379E-26, Group148=4.2459064872117324E-12, Group161=1.945894201554751E-26}	[APOE, IFNG, IL1B, TNF]	[ABCG1, AGT, AGTR1, AGXT, APOA1, APOA2, APOA4, APOA5, APOC1, APOE, BMP6, CTDSP2, FAM58A, FGF1, GUCY2C, IFNG, IL1B, LDLRAP1, LPAL2, NR1D1, POR, PPARGC1A, PRKAA1, SCP2, SREBF1, STAR, STARD4, SYCP2, TNF, VDAC2, WNT4]	FALSE
GO:0048304	GO_BiologicalProcess-GOA_23.02.2017_10h01	positive regulation of isotype switching to IgG isotypes	[4, 5, 6, 7, 8, 9, 10, 11, 12, 13, 14, 15]	[Group135, Group161]	3	30	6.74521e-06	0.000762209	{Group135=2.6641611867720388E-12, Group161=1.2972628010365007E-28}	{Group135=9.857396391056543E-11, Group161=1.945894201554751E-26}	[IFNG, IL2, IL4]	[ATAD5, CD28, CD40, IFNG, IL2, IL4, MLH1, MSH2, PAXIP1, TBX21]	FALSE
GO:1902931	GO_BiologicalProcess-GOA_23.02.2017_10h01	negative regulation of alcohol biosynthetic process	[4, 5, 6, 7]	[Group108, Group125, Group158, Group161]	3	30	6.74521e-06	0.000762209	{Group108=1.0260577003899081E-11, Group125=7.480942316253816E-16, Group158=2.1814444388913482E-30, Group161=1.2972628010365007E-28}	{Group108=3.283384641247706E-10, Group125=5.311469044540209E-14, Group158=3.3594244358926764E-28, Group161=1.945894201554751E-26}	[APOE, NFKB1, SOD1]	[APOE, CYP27B1, ERLIN1, ERLIN2, GFI1, NFKB1, PLEK, SCAP, SH2D2A, SOD1]	FALSE
GO:0030183	GO_BiologicalProcess-GOA_23.02.2017_10h01	B cell differentiation	[5, 7, 8, 9, 10]	[Group134, Group137, Group161]	6	5.04202	7.03617e-06	0.000788051	{Group134=5.416335777720201E-14, Group137=1.0770586316843705E-11, Group161=1.2972628010365007E-28}	{Group134=3.0331480355233125E-12, Group137=3.231175895053112E-10, Group161=1.945894201554751E-26}	[BAX, BCL2, CD40LG, IL10, IL4, PIK3R1]	[ABL1, ADA, ADAM17, ADGRG3, AICDA, ATM, ATP11C, BAD, BAK1, BAX, BCL2, BCL3, BCL6, BLNK, BTK, CARD11, CD27, CD40LG, CD79A, CD79B, CDH17, CEBPG, CLCF1, CMTM7, CR2, CYLD, DCAF1, DCLRE1C, DLL1, DOCK10, DOCK11, EP300, FLT3, FNIP1, FZD9, GON4L, GPR183, HDAC4, HDAC5, HDAC9, HHEX, HLA-DQB2, ID2, IFNA1, IFNA10, IFNA14, IFNA16, IFNA17, IFNA2, IFNA21, IFNA4, IFNA5, IFNA6, IFNA7, IFNA8, IFNB1, IFNE, IFNK, IF…	FALSE
GO:0032735	GO_BiologicalProcess-GOA_23.02.2017_10h01	positive regulation of interleukin-12 production	[4, 5, 6]	[Group102, Group126, Group161]	4	12.5	7.1016e-06	0.000788277	{Group102=5.266614387496279E-16, Group126=5.208615599587011E-13, Group161=1.2972628010365007E-28}	{Group102=3.897294646747246E-14, Group126=2.2397047078224147E-11, Group161=1.945894201554751E-26}	[CD40LG, IFNG, MAPK14, RELA]	[AGER, CCL19, CCR7, CD36, CD40, CD40LG, HLA-G, HMGB1, HSPD1, IDO1, IFNG, IL12B, IL23A, IL23R, IRF1, IRF5, IRF8, ISL1, LGALS9, LTB, MAPK11, MAPK14, PLCB1, RELA, RIPK2, TIRAP, TLR2, TLR3, TLR4, TLR9, TNFSF4, TRAF6]	FALSE
GO:0019229	GO_BiologicalProcess-GOA_23.02.2017_10h01	regulation of vasoconstriction	[5, 6, 7, 9]	[Group058, Group073, Group088, Group159]	5	7.14286	7.85735e-06	0.000864309	{Group058=1.7223391850378113E-12, Group073=3.0729508041895474E-17, Group088=8.18427208747288E-14, Group159=2.3614833448420293E-33}	{Group058=6.889356740151245E-11, Group073=2.6427376916030108E-15, Group088=4.337664206360627E-12, Group159=3.6839140179535657E-31}	[ACE, ACE2, EGFR, ICAM1, PTGS2]	[ACE, ACE2, ADM, ADRA1A, ADRA1B, ADRA1D, ADRA2A, ADRA2B, ADRA2C, AGT, AGTR1, AGXT, AKT1, APLN, ARHGAP42, ASIC2, ATP1A2, AVP, AVPR1A, AVPR1B, AVPR2, BDKRB1, BDKRB2, BMPR2, C13662, C19897, CASR, CAV1, CD38, CHRM1, CHRM3, DBH, DHX15, DHX34, DHX8, DOCK4, DOCK5, ECE1, EDN1, EDN2, EDN3, EGFR, F2R, FGA, FGB, FGG, GJA1, GJA5, HRH1, HRH2, HTR2A, ICAM1, IFNAR1, KCNA5, KCNMB2, KCNMB3, KCNMB4, LEP, NLRP3, OX…	FALSE
GO:0032612	GO_BiologicalProcess-GOA_23.02.2017_10h01	interleukin-1 production	[4]	[Group008, Group098, Group145, Group148, Group151, Group161]	5	7.14286	7.85735e-06	0.000864309	{Group008=1.873217718010227E-8, Group098=1.7727505368998016E-13, Group145=8.291268333444812E-26, Group148=7.862789791132838E-14, Group151=5.6806760749081155E-21, Group161=1.2972628010365007E-28}	{Group008=1.3112524026071587E-7, Group098=8.509202577119047E-12, Group145=1.1607775666822736E-23, Group148=4.2459064872117324E-12, Group151=6.930424811387901E-19, Group161=1.945894201554751E-26}	[HSPB1, IFNG, IL10, IL1B, SMAD3]	[ABCA1, AIM2, ANXA1, APOA1, ARRB2, AZU1, CALCA, CARD8, CASP1, CASP5, CCL19, CCL20, CCL3, CCR7, CD36, CEACAM1, CMA1, EGR1, ERRFI1, F2R, F2RL1, FOXP1, GAS6, GBP5, GHRL, GHSR, GSDMD, GSTP1, HAVCR2, HDAC2, HMGB1, HSPB1, IFI16, IFNAR1, IFNG, IL10, IL1B, IL1R2, ISL1, JAK2, LGALS9, MEFV, MR1, NLRC4, NLRP1, NLRP12, NLRP2, NLRP3, NOD1, NOD2, NR1H4, P2RX7, PANX1, PML, PNKD, PYCARD, PYDC1, PYDC2, S100A13, S…	FALSE
GO:0044259	GO_BiologicalProcess-GOA_23.02.2017_10h01	multicellular organismal macromolecule metabolic process	[4]	[Group159]	6	4.91803	8.12115e-06	0.000877084	{Group159=2.3614833448420293E-33}	{Group159=3.6839140179535657E-31}	[ACE, ACE2, CCL2, CTSB, IL6, PPARG]	[ACACA, ACE, ACE2, ADAM15, ADAMTS14, ADAMTS2, ADAMTS3, AKR1C3, AMELX, ARG1, BMP4, CBX8, CCL2, CEL, CIITA, COL10A1, COL11A1, COL11A2, COL12A1, COL13A1, COL15A1, COL18A1, COL19A1, COL1A1, COL1A2, COL25A1, COL26A1, COL2A1, COL3A1, COL4A1, COL4A2, COL4A3, COL4A4, COL4A5, COL4A6, COL5A1, COL5A2, COL5A3, COL6A1, COL6A2, COL6A3, COL6A5, COL6A6, COL7A1, COL8A1, COL8A2, CREB3L1, CST3, CTGF, CTSB, CTSD, CT…	FALSE
GO:0045807	GO_BiologicalProcess-GOA_23.02.2017_10h01	positive regulation of endocytosis	[3, 4, 5, 6, 7]	[Group076, Group079, Group082, Group114, Group125, Group150, Group159, Group161]	6	4.83871	8.91703e-06	0.000945205	{Group076=5.586511777497201E-15, Group079=8.893212916361293E-15, Group082=9.778798445098952E-9, Group114=2.1225869765692824E-15, Group125=7.480942316253816E-16, Group150=6.47380039518465E-25, Group159=2.3614833448420293E-33, Group161=1.2972628010365007E-28}	{Group076=3.631232655373181E-13, Group079=5.691656266471228E-13, Group082=1.0756678289608847E-7, Group114=1.4645850138328048E-13, Group125=5.311469044540209E-14, Group150=8.998582549306663E-23, Group159=3.6839140179535657E-31, Group161=1.945894201554751E-26}	[APOE, CCL2, IL1B, PPARG, SERPINE1, TNF]	[ABCA7, ABR, ACTN4, AHI1, AHSG, ANGPT1, ANKFY1, ANO6, ANXA2, APOA5, APOE, ARF1, ARF1P1, ARRB1, ARRB2, ATAD1, AXL, AZU1, B2M, BCR, BICD1, C2, C3, C4A, C4B, CALR, CALY, CAMK1D, CAV3, CBL, CBLL1, CCL14, CCL19, CCL2, CCL21, CD14, CD300LF, CD36, CD47, CD63, CLIP3, CYBA, DAB2, DLL1, DNM1L, DNM2, DOCK2, DRD2, EEF2K, EGF, F2RL1, F3, FCER1G, FLOT1, FMR1, FMR1-IT1, GAS6, GATA2, GPC3, GREM1, HAMP, HFE, HIP1…	FALSE
GO:0048147	GO_BiologicalProcess-GOA_23.02.2017_10h01	negative regulation of fibroblast proliferation	[4, 5, 6]	[Group023, Group032, Group077, Group122, Group128, Group137, Group143, Group151, Group160, Group161]	4	11.7647	9.10482e-06	0.000956006	{Group023=1.3370853332271275E-11, Group032=1.0612168011302865E-10, Group077=1.4816838565081345E-16, Group122=1.1159148140695808E-17, Group128=2.43620398361868E-20, Group137=1.0770586316843705E-11, Group143=1.0304610897274216E-26, Group151=5.6806760749081155E-21, Group160=2.095925753462619E-36, Group161=1.2972628010365007E-28}	{Group023=3.87754746635867E-10, Group032=2.6530420028257164E-9, Group077=1.1705302466414263E-14, Group122=1.0154824808033186E-15, Group128=2.825996620997669E-18, Group137=3.231175895053112E-10, Group143=1.4735593583102129E-24, Group151=6.930424811387901E-19, Group160=3.311562690470938E-34, Group161=1.945894201554751E-26}	[BAX, IFNG, PPARG, TP53]	[AGTR2, B4GALT7, BAX, C1QL4, CD300A, CDC73, DAB2IP, DACH1, EMD, FBXO4, FTH1, GSTP1, IFI30, IFNG, LTA, MED25, MED31, MED9, MORC3, MYC, NF1, NUPR1, PARP10, PAWR, PEX2, PPARG, PVT1, SFRP1, SKI, SOD2, TP53, TP53BP1, TP53INP1, TRIM32]	FALSE
GO:0034116	GO_BiologicalProcess-GOA_23.02.2017_10h01	positive regulation of heterotypic cell-cell adhesion	[4, 5, 6, 7]	[Group148, Group161]	3	27.2727	9.24866e-06	0.000961861	{Group148=7.862789791132838E-14, Group161=1.2972628010365007E-28}	{Group148=4.2459064872117324E-12, Group161=1.945894201554751E-26}	[IL10, IL1B, TNF]	[ALOX15, BMP7, CD44, FGA, FGB, FGG, FLOT1, GCNT2, IL10, IL1B, TNF]	FALSE
GO:1903076	GO_BiologicalProcess-GOA_23.02.2017_10h01	regulation of protein localization to plasma membrane	[5, 6, 7]	[Group030, Group057, Group109, Group158]	5	6.84931	9.66338e-06	0.000995328	{Group030=6.554902454475491E-13, Group057=4.253617063750937E-13, Group109=9.5049965209969E-19, Group158=2.1814444388913482E-30}	{Group030=2.7530590308797062E-11, Group057=1.8715915080504124E-11, Group109=9.219846625366993E-17, Group158=3.3594244358926764E-28}	[BCL2L1, EGFR, IFNG, PIK3R1, PRKCE]	[ACSL3, AGR2, AKR1B1, AKT1, ANXA13, AP2M1, APPL1, AR, AREG, ARF6, ARHGEF16, BCL2L1, CIB1, CLIP3, CLTC, CNST, CSK, DAB2, DLG1, DPP10, EGFR, EPHA2, EZR, GBP1, GOPC, GPER1, IFNG, ITGA3, ITGB1, KALRN, KIF5B, LDLRAP1, LRRC15, LYPD1, LYPLA1, NKD2, NRXN1, NUMB, PDPK1, PID1, PIK3R1, PKDCC, PLS1, PPFIA1, PPP1R9B, PPP2R5A, PRKCE, PRKCH, PRKCI, RAB11A, RAB11FIP2, RACK1, RAMP3, RANGRF, RER1, RHOG, RHOQ, SORB…	FALSE
GO:0008286	GO_BiologicalProcess-GOA_23.02.2017_10h01	insulin receptor signaling pathway	[6, 7, 8, 9]	[Group144, Group161]	6	4.72441	1.02284e-05	0.00104329	{Group144=3.030093432374026E-28, Group161=1.2972628010365007E-28}	{Group144=4.484538279913559E-26, Group161=1.945894201554751E-26}	[CDK4, GRB2, IL1B, PIK3R1, PRKCB, RELA]	[ADIPOR1, AHSG, AKT1, AKT2, AP3S1, APC, APPL1, ATP6AP1, ATP6V0A1, ATP6V0A2, ATP6V0A4, ATP6V0B, ATP6V0C, ATP6V0D1, ATP6V0D2, ATP6V0E1, ATP6V0E2, ATP6V1A, ATP6V1B1, ATP6V1B2, ATP6V1C1, ATP6V1C2, ATP6V1D, ATP6V1E1, ATP6V1E2, ATP6V1F, ATP6V1G1, ATP6V1G2, ATP6V1G3, ATP6V1H, BAIAP2, BAIAP2L1, BAIAP2L2, BCAR1, C16542, C1QTNF12, C2CD5, CAV2, CCND3, CDK4, CISH, DNAI1, EIF4EBP1, EIF4EBP2, ENPP1, FER, FOXC2…	FALSE
GO:0035690	GO_BiologicalProcess-GOA_23.02.2017_10h01	cellular response to drug	[4]	[Group036, Group040, Group084, Group099, Group103, Group159, Group161]	5	6.57895	1.17787e-05	0.00116609	{Group036=1.0299156926148561E-11, Group040=1.6550600522035983E-11, Group084=9.938191658653112E-14, Group099=5.555412196230995E-16, Group103=4.578328693136612E-19, Group159=2.3614833448420293E-33, Group161=1.2972628010365007E-28}	{Group036=3.192738647106054E-10, Group040=4.4686621409497153E-10, Group084=5.068477745913087E-12, Group099=4.055450903248627E-14, Group103=4.7156785539307104E-17, Group159=3.6839140179535657E-31, Group161=1.945894201554751E-26}	[CCL2, EGFR, IL1B, NOS2, TP53]	[ACER2, ACOD1, ADIPOQ, ADSSL1, AIM2, ANKRD1, BRAF, CAD, CCL2, CD69, CERS1, CHEK2, COASY, CRHBP, DDC, DFFB, DPEP1, EDN1, EFTUD2, EGFR, EHMT2, EIF2B5, FBP1, FGF21, GAS6, GPLD1, HMGA2, HSF1, HSP90AB1, HSPA5, HTR1B, IL1B, KCNC1, KCNE2, KCNH2, KCNQ1, KCTD11, KMT2A, MEF2C, MT2A, MT3, MYC, NANOS2, NCOA1, NFE2L2, NKX3-1, NOS2, PDE2A, PDE4A, PDE4B, PPAT, PPM1E, PPM1F, PPP1R12A, PPP1R14A, PPP1R9B, PPP3CA, …	FALSE
GO:0050871	GO_BiologicalProcess-GOA_23.02.2017_10h01	positive regulation of B cell activation	[5, 6, 7, 8]	[Group131, Group133, Group161]	6	4.61538	1.16917e-05	0.00116917	{Group131=8.965170180080678E-17, Group133=6.575467853059808E-19, Group161=1.2972628010365007E-28}	{Group131=7.351439547666156E-15, Group133=6.641222531590407E-17, Group161=1.945894201554751E-26}	[BCL2, CD81, IFNG, IL2, IL4, IL6]	[ADA, AMH, ATAD5, ATP11C, BAD, BCL2, BCL6, BTK, CARD11, CD27, CD28, CD38, CD40, CD74, CD81, CDKN1A, CHRNB2, CLCF1, EXOSC3, EXOSC6, GPR183, IFNG, IGHA1, IGHA2, IGHD, IGHE, IGHG1, IGHG2, IGHG3, IGHG4, IGHM, IGHV1-18, IGHV1-24, IGHV1-3, IGHV1-45, IGHV1-58, IGHV1-69-2, IGHV1OR15-1, IGHV1OR15-9, IGHV2-26, IGHV2OR16-5, IGHV3-15, IGHV3-16, IGHV3-20, IGHV3-21, IGHV3-23, IGHV3-35, IGHV3-38, IGHV3-43, IGHV…	FALSE
GO:0002693	GO_BiologicalProcess-GOA_23.02.2017_10h01	positive regulation of cellular extravasation	[4, 5, 6, 7, 8, 9]	[Group012, Group061, Group103, Group127, Group135, Group152, Group159]	3	25	1.2297e-05	0.0012051	{Group012=8.013288701897547E-9, Group061=2.3024050426205298E-26, Group103=4.578328693136612E-19, Group127=9.796760338000124E-17, Group135=2.6641611867720388E-12, Group152=3.9478872628846304E-24, Group159=2.3614833448420293E-33}	{Group012=9.615946442277057E-8, Group061=3.269415160521152E-24, Group103=4.7156785539307104E-17, Group127=7.9353758737801E-15, Group135=9.857396391056543E-11, Group152=5.329647804894251E-22, Group159=3.6839140179535657E-31}	[CCL2, ICAM1, IL1A]	[ADAM8, CCL2, CCR2, ELANE, FADD, ICAM1, IL1A, IL1R1, ITGA4, PDGFD, PLVAP, PTAFR]	FALSE
GO:0045086	GO_BiologicalProcess-GOA_23.02.2017_10h01	positive regulation of interleukin-2 biosynthetic process	[5, 6, 7, 8, 9]	[Group054, Group111, Group141, Group152, Group161]	3	25	1.2297e-05	0.0012051	{Group054=3.353524727928328E-13, Group111=1.595395626325167E-17, Group141=5.055409846520685E-27, Group152=3.9478872628846304E-24, Group161=1.2972628010365007E-28}	{Group054=1.542621374847031E-11, Group111=1.4358560636926502E-15, Group141=7.330344277454994E-25, Group152=5.329647804894251E-22, Group161=1.945894201554751E-26}	[CD4, IL1A, IL1B]	[CARD11, CD28, CD3E, CD4, CD80, CD86, GLMN, IL1A, IL1B, IRF4, PRKCQ, STAT5B]	FALSE
GO:0097011	GO_BiologicalProcess-GOA_23.02.2017_10h01	cellular response to granulocyte macrophage colony-stimulating factor stimulus	[6]	[Group010, Group031]	3	25	1.2297e-05	0.0012051	{Group010=1.2309986704583822E-9, Group031=1.01839353956105E-12}	{Group010=1.8464980056875732E-8, Group031=4.175413512200305E-11}	[CD4, CSF2, MAPK1]	[AKT1, CD4, CSF2, ETV3, FCAR, MAPK1, NPR2, NPRL2, PDE1B, PDE2A, ZFP36, ZFP36L2]	FALSE
GO:0032637	GO_BiologicalProcess-GOA_23.02.2017_10h01	interleukin-8 production	[4]	[Group007, Group040, Group161]	5	6.49351	1.25587e-05	0.00121819	{Group007=1.2654978389004852E-8, Group040=1.6550600522035983E-11, Group161=1.2972628010365007E-28}	{Group007=1.0123982711203881E-7, Group040=4.4686621409497153E-10, Group161=1.945894201554751E-26}	[IL10, IL1B, NOS2, SERPINE1, TNF]	[ADIPOQ, AFAP1L2, AIFM2, ANXA1, ANXA4, APOA2, ARRB1, BCL10, BCL3, BPI, C5AR2, CACTIN, CALCA, CAMP, CD14, CD2, CD244, CD58, CHAMP1, CHI3L1, CRP, CSRP1, DDIT3, DDX58, EHHADH, ELANE, F2R, F2RL1, FADD, FCN1, FFAR2, GDF2, HSPA1A, HSPA1B, HYAL2, IL10, IL17F, IL1B, IL6R, KLF4, LBP, LEP, LGALS9, LPAL2, MAP2K5, MAVS, NANOS2, NDUFA2, NLRP10, NOD1, NOD2, NOS2, OTUD7B, PARK7, PLA2G1B, PPIAP10, PRG3, PRKD2, P…	FALSE
GO:0071549	GO_BiologicalProcess-GOA_23.02.2017_10h01	cellular response to dexamethasone stimulus	[6, 8, 9]	[Group056, Group061, Group067, Group073, Group084, Group089, Group103, Group112, Group127, Group129, Group135, Group140, Group150, Group152, Group156, Group159, Group161]	4	10.8108	1.28523e-05	0.00123382	{Group056=8.114071639618488E-17, Group061=2.3024050426205298E-26, Group067=3.8968317253609067E-17, Group073=3.0729508041895474E-17, Group084=9.938191658653112E-14, Group089=2.0657438308566865E-17, Group103=4.578328693136612E-19, Group112=2.0443419021937814E-23, Group127=9.796760338000124E-17, Group129=5.489879487929511E-20, Group135=2.6641611867720388E-12, Group140=1.0731331045036508E-17, Group15…	{Group056=6.734679460883345E-15, Group061=3.269415160521152E-24, Group067=3.3123069665567706E-15, Group073=2.6427376916030108E-15, Group084=5.068477745913087E-12, Group089=1.838512009462451E-15, Group103=4.7156785539307104E-17, Group112=2.6780878918738537E-21, Group127=7.9353758737801E-15, Group129=6.0937662316017574E-18, Group135=9.857396391056543E-11, Group140=9.872824561433587E-16, Group150=8.…	[CCL2, EGFR, ICAM1, IL6]	[ABCB4, ABCC2, AGTR2, AQP1, ARG1, C16079, CASP9, CBX3, CCL2, CFLAR, CRH, DDIT4, DNMT3B, EGFR, EIF4E, EIF4EBP1, ERRFI1, FAM58A, FBXO32, FECH, FOXO1, GJB2, GUCY2C, ICAM1, IFNB1, IL6, MSTN, NR3C1, RPL32, RPS6KB1, SERPINF1, SMYD3, SRD5A1, STAR, TFAP4, TGFB1, TINAGL1]	FALSE
GO:0034250	GO_BiologicalProcess-GOA_23.02.2017_10h01	positive regulation of cellular amide metabolic process	[4, 5, 6]	[Group014, Group037, Group078, Group086, Group114, Group118, Group133, Group143, Group147, Group149, Group155, Group156, Group157, Group161]	6	4.51128	1.33201e-05	0.00126541	{Group014=3.115639175355854E-10, Group037=6.61054049147753E-17, Group078=9.848377456993859E-21, Group086=1.2095964201304352E-16, Group114=2.1225869765692824E-15, Group118=4.905106245059882E-26, Group133=6.575467853059808E-19, Group143=1.0304610897274216E-26, Group147=2.219335197191626E-28, Group149=2.409346134030596E-21, Group155=1.5800558011000385E-30, Group156=2.39789469623427E-30, Group157=6.0…	{Group014=6.231278350711708E-9, Group037=5.5528540128411255E-15, Group078=1.1818052948392632E-18, Group086=9.676771361043482E-15, Group114=1.4645850138328048E-13, Group118=6.916199805534434E-24, Group133=6.641222531590407E-17, Group143=1.4735593583102129E-24, Group147=3.306809443815523E-26, Group149=2.963495744857633E-19, Group155=2.4490864917050597E-28, Group156=3.668778885238433E-28, Group157=9…	[APOE, CDK4, IL6, MAPK1, MAPK3, TNF]	[ABCF1, APOE, BARHL2, BCDIN3D, BCL3, BOLL, C1QBP, CCL5, CD28, CDC123, CDK4, CDK5RAP1, CHRFAM7A, CHRNA7, CIRBP, CLU, COA3, CPEB1, CPEB3, CSNK1E, CYR61, DAZ1, DAZL, DDX39B, DDX3X, DEFB103A, DNAJC3, DND1, EEF2, EIF2AK4, EIF2B5, EIF3C, EIF3D, EIF3E, EIF4A3, EIF4G2, EIF5A, EIF5A2, EIF5AL1, EIF6, ELAVL1, EPRS, ERBB2, ESR1, FAM129A, FMR1, FMR1-IT1, GSAP, GUF1, HNRNPD, HNRNPL, IL6, IMPACT, ITGA2, KHDRBS1…	FALSE
GO:0071392	GO_BiologicalProcess-GOA_23.02.2017_10h01	cellular response to estradiol stimulus	[5, 6]	[Group042, Group056, Group067, Group084, Group087, Group098, Group100, Group112, Group115, Group129, Group140, Group145, Group150, Group152, Group156, Group159, Group161]	4	10.5263	1.43221e-05	0.00134628	{Group042=3.087487453903566E-14, Group056=8.114071639618488E-17, Group067=3.8968317253609067E-17, Group084=9.938191658653112E-14, Group087=1.685885468660308E-13, Group098=1.7727505368998016E-13, Group100=1.4518138688106545E-11, Group112=2.0443419021937814E-23, Group115=5.1646959803579173E-14, Group129=5.489879487929511E-20, Group140=1.0731331045036508E-17, Group145=8.291268333444812E-26, Group150…	{Group042=1.8833673468811752E-12, Group056=6.734679460883345E-15, Group067=3.3123069665567706E-15, Group084=5.068477745913087E-12, Group087=8.26083879643551E-12, Group098=8.509202577119047E-12, Group100=4.0650788326698327E-10, Group112=2.6780878918738537E-21, Group115=2.995523668607592E-12, Group129=6.0937662316017574E-18, Group140=9.872824561433587E-16, Group145=1.1607775666822736E-23, Group150=…	[CCL2, EGFR, IL10, IL6]	[ABCB4, AIFM1, CCDC62, CCL2, CCNA2, CFLAR, CRHBP, DDX18, EGFR, ESR1, ESR2, GPER1, H2AFZ, HNRNPD, HSF1, IL10, IL6, ITGA2, KAT5, KIF18A, MSX2, MYOD1, MYOG, NCOA3, NRIP1, POU4F1, POU4F2, PPARGC1A, PPP1R9B, RAMP3, RUVBL2, SFRP1, SRD5A1, SSTR1, SSTR2, SSTR3, UGT1A1, ZNF703]	FALSE
GO:0033135	GO_BiologicalProcess-GOA_23.02.2017_10h01	regulation of peptidyl-serine phosphorylation	[7, 8, 9, 10]	[Group062, Group117, Group131, Group133, Group142, Group156, Group158, Group160, Group161]	6	4.44444	1.45041e-05	0.00134888	{Group062=4.359779768241478E-20, Group117=9.856959170040014E-12, Group131=8.965170180080678E-17, Group133=6.575467853059808E-19, Group142=7.17431876360572E-19, Group156=2.39789469623427E-30, Group158=2.1814444388913482E-30, Group160=2.095925753462619E-36, Group161=1.2972628010365007E-28}	{Group062=4.970148935795285E-18, Group117=3.2527965261132046E-10, Group131=7.351439547666156E-15, Group133=6.641222531590407E-17, Group142=7.174318763605721E-17, Group156=3.668778885238433E-28, Group158=3.3594244358926764E-28, Group160=3.311562690470938E-34, Group161=1.945894201554751E-26}	[BAX, BCL2, IFNG, IL6, PTGS2, TNF]	[AKAP9, AKT1, AMH, ANGPT1, ARAF, ARRB1, ARRB2, ATP2B4, AVP, AXIN1, BAG4, BAK1, BAX, BCAR3, BCL2, BDKRB1, BDKRB2, BRAF, C13662, CAMK1, CAPRIN2, CAV1, CCM2, CD44, CDC42, CNKSR3, CREBL2, CSF3, DDIT4, DKK1, DMD, DMTN, DOCK7, EIF4G1, FNIP1, FNIP2, GAS6, GCG, GFRA2, GGNBP2, GPD1L, GSK3B, HAX1, HCLS1, HGF, HRC, IFNA1, IFNA10, IFNA14, IFNA16, IFNA17, IFNA2, IFNA21, IFNA4, IFNA5, IFNA6, IFNA7, IFNA8, IFNA…	FALSE
GO:0048565	GO_BiologicalProcess-GOA_23.02.2017_10h01	digestive tract development	[3, 4, 5, 6]	[Group027, Group085, Group156, Group158, Group161]	6	4.41176	1.51272e-05	0.0013917	{Group027=2.6415810914468555E-9, Group085=2.6500112563124555E-15, Group156=2.39789469623427E-30, Group158=2.1814444388913482E-30, Group161=1.2972628010365007E-28}	{Group027=3.698213528025598E-8, Group085=1.8020076542924697E-13, Group156=3.668778885238433E-28, Group158=3.3594244358926764E-28, Group161=1.945894201554751E-26}	[BCL2, CXCL8, EGFR, RB1, SMAD3, TNF]	[ACVR2B, ADA, AGR2, AHI1, ALDH1A2, ALX4, ASCL1, BBS7, BCL2, BMP4, C13055, C1GALT1, C21orf33, CBFA2T2, CCDC103, CCDC39, CCDC40, CCKBR, CCNB1, CDKN1A, CDX2, CHD8, CLDN18, CLMP, COBL, COL3A1, CPS1, CTNNB1, CXCL8, CYP1A1, CYP21A2, DAB1, DACT1, DCHS1, DHX15, DNAAF1, DNAAF3, EDNRB, EGFR, EPB41L5, EPHB3, FAT4, FGF10, FGF9, FGFR2, FLNB, FOXE1, FOXF1, FOXF2, FOXL1, GATA4, GATA5, GATA6, GLI1, GLI2, GLI3, H…	FALSE
GO:0002639	GO_BiologicalProcess-GOA_23.02.2017_10h01	positive regulation of immunoglobulin production	[4, 5, 6, 7]	[Group135, Group138, Group140, Group161]	4	10.2564	1.5912e-05	0.001448	{Group135=2.6641611867720388E-12, Group138=2.2350029818032858E-20, Group140=1.0731331045036508E-17, Group161=1.2972628010365007E-28}	{Group135=9.857396391056543E-11, Group138=2.6149534887098442E-18, Group140=9.872824561433587E-16, Group161=1.945894201554751E-26}	[IFNG, IL2, IL4, IL6]	[ATAD5, CD28, CD40, CLCF1, EXOSC3, EXOSC6, GNPDA1, GPI, HLA-E, HPX, IFNG, IL13, IL2, IL33, IL4, IL4R, IL5, IL6, MLH1, MSH2, MSH6, MZB1, NSD2, PAXIP1, POLR2D, RBP4, SASH3, STAT6, STX4, TBX21, TFRC, TGFB1, TNFRSF4, TNFSF13, TNFSF4, UNG, XBP1, XBP1P1, XCL1]	FALSE
GO:0030225	GO_BiologicalProcess-GOA_23.02.2017_10h01	macrophage differentiation	[7, 8, 9, 10]	[Group013, Group032, Group046, Group161]	4	10.2564	1.5912e-05	0.001448	{Group013=1.8634867332557528E-13, Group032=1.0612168011302865E-10, Group046=1.7206874458711569E-15, Group161=1.2972628010365007E-28}	{Group013=8.758387646302038E-12, Group032=2.6530420028257164E-9, Group046=1.2044812121098097E-13, Group161=1.945894201554751E-26}	[CASP8, PARP1, PRKCA, RB1]	[ADIPOQ, BMP4, C1QC, CALCA, CASP8, CDC42, CEBPA, CEBPE, CSF1, CSF1R, EIF2AK1, EIF2AK2, FADD, GAB3, GATA2, HCLS1, ID2, IL31RA, IL34, INHA, INHBA, L3MBTL3, LIF, MMP9, NKX2-3, PARP1, PF4, PRKCA, PTPN2, RB1, RIPK1, ROR2, RORA, SIRT1, SPI1, TRIB1, TSPAN2, VEGFA, ZBTB46]	FALSE
GO:0048662	GO_BiologicalProcess-GOA_23.02.2017_10h01	negative regulation of smooth muscle cell proliferation	[4, 5, 6]	[Group032, Group077, Group098, Group145, Group148, Group151, Group159, Group160, Group161]	4	10.2564	1.5912e-05	0.001448	{Group032=1.0612168011302865E-10, Group077=1.4816838565081345E-16, Group098=1.7727505368998016E-13, Group145=8.291268333444812E-26, Group148=7.862789791132838E-14, Group151=5.6806760749081155E-21, Group159=2.3614833448420293E-33, Group160=2.095925753462619E-36, Group161=1.2972628010365007E-28}	{Group032=2.6530420028257164E-9, Group077=1.1705302466414263E-14, Group098=8.509202577119047E-12, Group145=1.1607775666822736E-23, Group148=4.2459064872117324E-12, Group151=6.930424811387901E-19, Group159=3.6839140179535657E-31, Group160=3.311562690470938E-34, Group161=1.945894201554751E-26}	[HMOX1, IFNG, IL10, PPARG]	[ADIPOQ, AIF1, ANG, APOD, CDKN1B, CNN1, COMT, CTNNBIP1, GPER1, GSTP1, HMOX1, IFNG, IGFBP3, IGFBP5, IL10, IL12A, IL12B, IL15, ILK, KLF4, MFN2, MYOCD, NDRG2, NDRG4, NPR1, NPR3, NPRL3, NR5A1, OGN, PPARD, PPARG, PPARGC1A, PTGIR, SF1, TGFB3, TNFAIP3, TPM1, TRIB1, VIPR2]	FALSE
GO:0019048	GO_BiologicalProcess-GOA_23.02.2017_10h01	modulation by virus of host morphology or physiology	[4, 5, 6]	[Group022, Group050, Group117, Group160]	4	10	1.76281e-05	0.00158653	{Group022=1.0673875035391895E-13, Group050=8.317822597433291E-20, Group117=9.856959170040014E-12, Group160=2.095925753462619E-36}	{Group022=5.336937517695947E-12, Group050=9.066426631202287E-18, Group117=3.2527965261132046E-10, Group160=3.311562690470938E-34}	[BCL2L1, CASP8, CD4, SMAD3]	[ATG7, BAD, BCL2L1, BCL2L11, CASP8, CCNK, CD209, CD4, CLEC4M, CPSF4, DAG1, EIF2AK2, EIF2AK4, FBLN1, HIPK2, HYAL2, INSR, KPNA1, KPNA2, KPNA3, KPNA4, KPNA5, KPNA6, KPNA7, KPNB1, MYC, NTRK3, PABPN1, PRKN, PVT1, RRAGA, RXRA, SLC25A6, SMAD3, TGFB1, TYMS, VAPA, VAPB, ZC3H12A, ZC3HAV1]	FALSE
GO:0043331	GO_BiologicalProcess-GOA_23.02.2017_10h01	response to dsRNA	[4, 5]	[Group034, Group053, Group078, Group085, Group143, Group155]	5	5.88235	2.03524e-05	0.00177066	{Group034=1.4198320846036622E-18, Group053=9.576111518151522E-14, Group078=9.848377456993859E-21, Group085=2.6500112563124555E-15, Group143=1.0304610897274216E-26, Group155=1.5800558011000385E-30}	{Group034=1.3630388012195157E-16, Group053=4.979577989438792E-12, Group078=1.1818052948392632E-18, Group085=1.8020076542924697E-13, Group143=1.4735593583102129E-24, Group155=2.4490864917050597E-28}	[EGFR, MAPK1, MAPK3, NFKB1, SMAD3]	[ADAR, AGO1, AGO2, AGO3, AGO4, BCDIN3D, CARD9, CAV1, CIITA, COLEC12, DDX1, DDX21, DDX56, DDX58, DGCR8, DHX36, DICER1, DROSHA, EGFR, ESR1, FLOT1, GARS, HNRNPA2B1, IFIT1, IFNA1, IFNA10, IFNA14, IFNA16, IFNA17, IFNA2, IFNA21, IFNA4, IFNA5, IFNA6, IFNA7, IFNA8, IFNB1, IFNE, IFNK, IFNW1, IRAK3, IRF3, KCNJ8, LIN28A, LIN28B, MAP2K1, MAP2K2, MAPK1, MAPK3, MAVS, MB21D1, METTL3, MUL1, MYCN, NCBP1, NCOR1, N…	FALSE
GO:1905952	GO_BiologicalProcess-GOA_23.02.2017_10h01	regulation of lipid localization	[3, 4]	[Group075, Group082, Group108, Group114, Group115, Group125, Group132, Group133, Group138, Group139, Group142, Group149, Group153, Group156, Group159, Group161]	6	4.1958	2.01213e-05	0.00177067	{Group075=2.6908036920448136E-16, Group082=9.778798445098952E-9, Group108=1.0260577003899081E-11, Group114=2.1225869765692824E-15, Group115=5.1646959803579173E-14, Group125=7.480942316253816E-16, Group132=1.6327869166520973E-27, Group133=6.575467853059808E-19, Group138=2.2350029818032858E-20, Group139=2.373309952007317E-19, Group142=7.17431876360572E-19, Group149=2.409346134030596E-21, Group153=9…	{Group075=2.0719188428745066E-14, Group082=1.0756678289608847E-7, Group108=3.283384641247706E-10, Group114=1.4645850138328048E-13, Group115=2.995523668607592E-12, Group125=5.311469044540209E-14, Group132=2.383868898312062E-25, Group133=6.641222531590407E-17, Group138=2.6149534887098442E-18, Group139=2.5157085491277562E-17, Group142=7.174318763605721E-17, Group149=2.963495744857633E-19, Group153=1…	[APOE, IL1B, IL6, NFKB1, PPARG, TNF]	[ABCA1, ABCA12, ABCA2, ABCA7, ABCB4, ABCG1, ABCG5, ABCG8, ABHD5, ACACB, ACSL4, ADIPOQ, AGT, AGTR1, AGTR2, AGXT, AKT1, AKT2, ALKBH7, AMH, ANXA2, APOA1, APOA2, APOA4, APOA5, APOB, APOC1, APOC2, APOC3, APOC4, APOE, ARV1, ATP8A1, ATP8A2, BMP6, C00746, C16079, C1D, C1QTNF1, C3, CD36, CETP, CIDEA, CRH, CRHR1, CRP, CRY1, CRY2, CSRP1, CTDSP2, CXXC1, CYP19A1, CYP4A11, CYP4F2, DISP3, EDN1, EGF, EHD1, ERFE,…	FALSE
GO:0043029	GO_BiologicalProcess-GOA_23.02.2017_10h01	T cell homeostasis	[4, 7]	[Group111, Group122, Group131, Group136, Group137, Group140, Group160, Group161]	4	9.30232	2.35951e-05	0.00200558	{Group111=1.595395626325167E-17, Group122=1.1159148140695808E-17, Group131=8.965170180080678E-17, Group136=1.8509521382527809E-22, Group137=1.0770586316843705E-11, Group140=1.0731331045036508E-17, Group160=2.095925753462619E-36, Group161=1.2972628010365007E-28}	{Group111=1.4358560636926502E-15, Group122=1.0154824808033186E-15, Group131=7.351439547666156E-15, Group136=2.313690172815976E-20, Group137=3.231175895053112E-10, Group140=9.872824561433587E-16, Group160=3.311562690470938E-34, Group161=1.945894201554751E-26}	[BAX, BCL2, CASP3, IL2]	[AKT1, BAX, BCL2, BCL2L11, CACNA1F, CASP3, CCNB2, CORO1A, DNAJA3, FADD, FAS, FASN, FOXN1, FOXP3, GPAM, GPR174, IL2, IL2RA, JAK3, LGALS9, LMO1, NCKAP1L, P2RX7, PMAIP1, PPP2R3C, PPP3CB, RAG1, RC3H1, RC3H2, RIPK3, RPS6, SIT1, SIVA1, SLC46A2, SLC6A20, SPNS2, STAT5B, TGFB1, TGFB2, TNFSF14, TSC22D3, TSC22D4, ZC3H8]	FALSE
GO:1901343	GO_BiologicalProcess-GOA_23.02.2017_10h01	negative regulation of vasculature development	[3, 4, 5, 6, 7, 8, 9]	[Group036, Group051, Group077, Group079, Group094, Group150, Group154, Group157]	5	5.61798	2.54453e-05	0.00211196	{Group036=1.0299156926148561E-11, Group051=6.726258273302631E-25, Group077=1.4816838565081345E-16, Group079=8.893212916361293E-15, Group094=1.4395324297023587E-22, Group150=6.47380039518465E-25, Group154=1.203528415039811E-23, Group157=6.014358351570216E-37}	{Group036=3.192738647106054E-10, Group051=9.28223641715763E-23, Group077=1.1705302466414263E-14, Group079=5.691656266471228E-13, Group094=1.813810861424972E-20, Group150=8.998582549306663E-23, Group154=1.6006927920029487E-21, Group157=9.562829778996643E-35}	[CCL2, CXCL10, IFNG, SERPINE1, STAT1]	[ADGRB1, ADGRB2, ADGRB3, AGT, AGXT, AMOT, ANGPT2, ANGPT4, APOH, BMP4, BMP7, C13705, CCL2, CCR2, CNMD, COL4A2, COL4A3, CTNNB1, CXCL10, CXCR3, DAB2IP, DCN, DLL4, ECSCR, EPHA2, FAM129B, FASLG, FOXC1, FOXO4, GDF2, GHRL, GPR4, GTF2I, HDAC5, HEY2, HHEX, HOXA5, HRG, IFNG, IL17F, ITGB1BP1, KLF4, KLK3, KLKB1, KRIT1, MAP2K5, MEOX2, MMRN2, NF1, NGFR, NOTCH1, NPPB, NPR1, NRG1, PDCD10, PDE3B, PDGFB, PF4, PGK1…	FALSE
GO:0010759	GO_BiologicalProcess-GOA_23.02.2017_10h01	positive regulation of macrophage chemotaxis	[5, 6, 7, 8, 9, 10, 11]	[Group091, Group124, Group147, Group157, Group161]	3	20	2.52192e-05	0.00211841	{Group091=1.9643660437894692E-20, Group124=7.279489626776259E-30, Group147=2.219335197191626E-28, Group157=6.014358351570216E-37, Group161=1.2972628010365007E-28}	{Group091=2.3179519316715738E-18, Group124=1.1064824232699913E-27, Group147=3.306809443815523E-26, Group157=9.562829778996643E-35, Group161=1.945894201554751E-26}	[CCL2, MAPK14, MAPK3]	[C3AR1, C5AR1, CCL2, CCL5, CMKLR1, CSF1, CXCL17, KARS, MAPK14, MAPK3, RARRES2, SLAMF1, THBS1, TNFSF18, TRPV4]	FALSE
GO:0097296	GO_BiologicalProcess-GOA_23.02.2017_10h01	activation of cysteine-type endopeptidase activity involved in apoptotic signaling pathway	[6, 7, 8, 9, 10, 11, 12, 13, 14]	[Group047, Group050, Group117, Group160]	3	20	2.52192e-05	0.00211841	{Group047=3.9053239828330067E-10, Group050=8.317822597433291E-20, Group117=9.856959170040014E-12, Group160=2.095925753462619E-36}	{Group047=6.639050770816111E-9, Group050=9.066426631202287E-18, Group117=3.2527965261132046E-10, Group160=3.311562690470938E-34}	[BAX, CASP8, SMAD3]	[BAX, CASP8, FADD, FAS, FASLG, FASN, JAK2, RIPK1, SMAD3, TANK, TNFRSF10A, TNFRSF10B, TNFSF10, TRADD, TRAF2]	FALSE
GO:0010883	GO_BiologicalProcess-GOA_23.02.2017_10h01	regulation of lipid storage	[3, 4, 5]	[Group025, Group052, Group115, Group125, Group132, Group138, Group139, Group142, Group143, Group153, Group156, Group159, Group161]	4	8.88889	2.83196e-05	0.00232221	{Group025=1.0149589553391206E-8, Group052=5.019251775501425E-16, Group115=5.1646959803579173E-14, Group125=7.480942316253816E-16, Group132=1.6327869166520973E-27, Group138=2.2350029818032858E-20, Group139=2.373309952007317E-19, Group142=7.17431876360572E-19, Group143=1.0304610897274216E-26, Group153=9.632572699614655E-25, Group156=2.39789469623427E-30, Group159=2.3614833448420293E-33, Group161=1.…	{Group025=1.0149589553391207E-7, Group052=3.764438831626069E-14, Group115=2.995523668607592E-12, Group125=5.311469044540209E-14, Group132=2.383868898312062E-25, Group138=2.6149534887098442E-18, Group139=2.5157085491277562E-17, Group142=7.174318763605721E-17, Group143=1.4735593583102129E-24, Group153=1.3196624598472077E-22, Group156=3.668778885238433E-28, Group159=3.6839140179535657E-31, Group161=…	[IL6, NFKB1, PPARG, TNF]	[ABCA1, ABCG1, ABHD5, ACACB, ALKBH7, APOB, APOC4, C3, CD36, CIDEA, CRP, CSRP1, EHD1, FBXW7, FITM1, FITM2, FTO, HILPDA, IKBKE, IL6, ITGAV, ITGB3, LCP1, LEP, LPL, MSR1, NFKB1, NFKBIA, NR1H2, NR1H3, OSBPL11, OSBPL8, PLA2G10, PLIN5, PNPLA2, PPARA, PPARG, PPIAP10, PTPN2, SCARB1, SIRT1, SREBF2, TNF, VSTM2A, ZC3H12A]	FALSE
GO:0030730	GO_BiologicalProcess-GOA_23.02.2017_10h01	sequestering of triglyceride	[4, 5]	[Group047, Group082, Group153, Group161]	3	18.75	3.09521e-05	0.00250712	{Group047=3.9053239828330067E-10, Group082=9.778798445098952E-9, Group153=9.632572699614655E-25, Group161=1.2972628010365007E-28}	{Group047=6.639050770816111E-9, Group082=1.0756678289608847E-7, Group153=1.3196624598472077E-22, Group161=1.945894201554751E-26}	[IL1B, PPARG, TNF]	[ABHD5, APOC4, CIDEA, ENPP1, FITM1, FITM2, IL1B, LCP1, LPL, OSBPL11, OSBPL8, PLIN5, PNPLA2, PPARA, PPARG, TNF]	FALSE
GO:0031295	GO_BiologicalProcess-GOA_23.02.2017_10h01	T cell costimulation	[3, 6, 7, 8, 9]	[Group161]	5	5.37634	3.14777e-05	0.00251822	{Group161=1.2972628010365007E-28}	{Group161=1.945894201554751E-26}	[CD4, CD40LG, DPP4, GRB2, PIK3R1]	[AKT1, ARHGEF7, BTLA, CARD11, CAV1, CCL19, CCL21, CCR7, CD24, CD247, CD274, CD28, CD3D, CD3E, CD3G, CD4, CD40LG, CD5, CD80, CD86, CDC42, CSK, CTLA4, DEAF1, DPP4, EFNB1, EFNB2, EFNB3, EPHB6, FYN, GNAO1, GRAP2, GRB2, HHLA2, HLA-DPA1, HLA-DPB1, HLA-DQA1, HLA-DQA2, HLA-DQB1, HLA-DQB2, HLA-DRA, HLA-DRB1, HLA-DRB3, HLA-DRB4, HLA-DRB5, ICOS, ICOSLG, KLRK1, LCK, LGALS1, LOC105369230, LYN, MAP3K14, MAP3K8…	FALSE
GO:0046324	GO_BiologicalProcess-GOA_23.02.2017_10h01	regulation of glucose import	[5, 6, 9, 10]	[Group074, Group161]	3	4.16667	0.00281904	0.00281904	{Group074=6.309205599136187E-19, Group161=1.2972628010365007E-28}	{Group074=6.435389711118911E-17, Group161=1.945894201554751E-26}	[MAPK14, PIK3R1, TNF]	[ADIPOQ, ADIPOR2, AGT, AGXT, AKT1, AKT2, APPL1, ARPP19, ASPSCR1, C16051, C1QTNF12, C1QTNF2, C2CD5, CAPN10, CLTCL1, CREBL2, ENPP1, FFAR3, FGF19, FGF21, GPC3, GRB10, GSK3A, HK2, HOOK2, IGF1, INS, INSR, IRS1, IRS2, ITLN1, KCNA5, KIF2A, LEP, LMBRD1, MAPK14, MYC, MZB1, NFE2L2, NGFR, NR1H4, OSBPL8, OSTN, PAK1, PEA15, PID1, PIK3R1, PIK3R2, PIK3R3, PKN1, PRKAA1, PRKAG2, PRKCI, PRKCZ, PTH, PTPN11, PTRH2, …	FALSE
GO:0055024	GO_BiologicalProcess-GOA_23.02.2017_10h01	regulation of cardiac muscle tissue development	[5, 6, 7, 8, 9]	[Group043, Group044, Group055, Group104, Group106]	3	4.16667	0.00281904	0.00281904	{Group043=7.255481590296722E-10, Group044=4.186338009055683E-13, Group055=1.6001975949374276E-14, Group104=5.90642690918055E-14, Group106=3.536637698216287E-14}	{Group043=1.1608770544474755E-8, Group044=1.8838521040750574E-11, Group055=1.0081244848105795E-12, Group104=3.2485348000493025E-12, Group106=2.1219826189297723E-12}	[CREB1, G6PD, MAPK14]	[AKAP6, ARRB2, BMP10, BMP2, BMP4, BMPR1A, CAV3, CCNB1, CDK1, CREB1, CTDP1, DDX39B, DKK1, EDN1, EFNB2, ERBB3, ERBB4, FGF13, FGF2, FGF20, FGF3, FGF8, FGF9, FGFR1, FGFR2, FRS2, FZD7, G6PD, GATA6, GJA1, GREM1, GSK3A, GSK3B, HAMP, HEY2, IGF1, JPH2, KCNK2, LONP1, MAPK11, MAPK14, MEF2C, MTOR, MYOCD, NKX2-5, NOG, NOTCH1, NRG1, PAK1, PDZD2, PIM1, PIN1, PKN1, POLR2D, PTEN, RBP4, RBPJ, SAV1, SMAD4, SOX6, TB…	FALSE
GO:2000573	GO_BiologicalProcess-GOA_23.02.2017_10h01	positive regulation of DNA biosynthetic process	[5, 6, 7, 8, 9]	[Group033, Group053, Group078, Group086, Group143, Group147, Group149, Group155, Group157, Group161]	3	4.16667	0.00281904	0.00281904	{Group033=2.356220841852683E-10, Group053=9.576111518151522E-14, Group078=9.848377456993859E-21, Group086=1.2095964201304352E-16, Group143=1.0304610897274216E-26, Group147=2.219335197191626E-28, Group149=2.409346134030596E-21, Group155=1.5800558011000385E-30, Group157=6.014358351570216E-37, Group161=1.2972628010365007E-28}	{Group033=5.183685852075903E-9, Group053=4.979577989438792E-12, Group078=1.1818052948392632E-18, Group086=9.676771361043482E-15, Group143=1.4735593583102129E-24, Group147=3.306809443815523E-26, Group149=2.963495744857633E-19, Group155=2.4490864917050597E-28, Group157=9.562829778996643E-35, Group161=1.945894201554751E-26}	[IL6, MAPK1, MAPK3]	[ACD, ANTXR1, ARHGEF7, ARRB2, ATM, ATR, AURKB, CCT2, CCT3, CCT4, CCT5, CCT6A, CCT7, CCT8, CHTF18, CHTF8, CTNNB1, DDX39B, DKC1, DSCC1, FGFR4, GREM1, GRHL2, HGF, HMBOX1, HNRNPA1, HNRNPA2B1, HNRNPD, HSP90AA1, HSP90AB1, IL6, KLF4, MAP2K7, MAP3K4, MAPK1, MAPK15, MAPK3, MAPKAPK5, MMAB, MYC, NAF1, NEK2, NEK7, NOX4, NVL, PAK3, PARM1, PDGFB, PDGFRB, PKIB, PNKP, POT1, PRKCQ, PRKD2, PTGES3, PTK2B, PVT1, RFC…	FALSE
GO:0042345	GO_BiologicalProcess-GOA_23.02.2017_10h01	regulation of NF-kappaB import into nucleus	[6, 7, 8, 9, 10, 11, 12, 13, 14]	[Group072, Group099, Group148, Group152, Group158, Group161]	4	8.33333	3.6659e-05	0.00289606	{Group072=3.6656708819119506E-14, Group099=5.555412196230995E-16, Group148=7.862789791132838E-14, Group152=3.9478872628846304E-24, Group158=2.1814444388913482E-30, Group161=1.2972628010365007E-28}	{Group072=2.162745820328051E-12, Group099=4.055450903248627E-14, Group148=4.2459064872117324E-12, Group152=5.329647804894251E-22, Group158=3.3594244358926764E-28, Group161=1.945894201554751E-26}	[IL10, IL1B, PTGS2, TNF]	[BCL3, BMP7, C1QTNF3, C8orf4, CCDC22, CCL19, CD27, CYLD, EDA, EDAR, FAF1, FBXW11, G3BP2, GREM1, IL10, IL12B, IL18R1, IL1B, IL23A, LGALS9, LITAF, NFKBIA, NLRP12, NLRP3, NOL3, NOV, PLXNA1, PPM1A, PPM1B, PRDX1, PSMD10, PTGS2, PYDC2, RBCK1, RHOA, RPL10, SPHK1, TLR2, TLR3, TLR4, TLR7, TLR9, TMSB4X, TNF, TNFSF14, TRIP6, ZC3H12A, ZNF268]	FALSE
GO:0045058	GO_BiologicalProcess-GOA_23.02.2017_10h01	T cell selection	[2, 6, 8, 9, 10, 11]	[Group106, Group133, Group134, Group160, Group161]	4	8.33333	3.6659e-05	0.00289606	{Group106=3.536637698216287E-14, Group133=6.575467853059808E-19, Group134=5.416335777720201E-14, Group160=2.095925753462619E-36, Group161=1.2972628010365007E-28}	{Group106=2.1219826189297723E-12, Group133=6.641222531590407E-17, Group134=3.0331480355233125E-12, Group160=3.311562690470938E-34, Group161=1.945894201554751E-26}	[BCL2, CD4, IL4, IL6]	[AIRE, ATG5, BATF, BCL11B, BCL2, BRAF, CARD11, CCR7, CD1D, CD28, CD3D, CD3E, CD4, CD74, CYLD, DEAF1, DOCK2, FAS, FASN, FOXN1, FOXP3, GATA3, GLI3, IL12B, IL12RB1, IL15, IL23A, IL23R, IL4, IL6, IRF4, ITPKB, JAG2, LOXL3, LY9, PTPN2, SHH, SLAMF6, SPN, SRF, STAT3, STAT6, STK11, SYK, THEMIS, TNFSF18, ZAP70, ZFPM1]	FALSE
GO:2000811	GO_BiologicalProcess-GOA_23.02.2017_10h01	negative regulation of anoikis	[6, 7, 8]	[Group090, Group121, Group136, Group160]	3	17.6471	3.74794e-05	0.00292339	{Group090=1.5479791277768595E-23, Group121=8.591502166967616E-20, Group136=1.8509521382527809E-22, Group160=2.095925753462619E-36}	{Group090=2.0433324486654544E-21, Group121=9.278822340325026E-18, Group136=2.313690172815976E-20, Group160=3.311562690470938E-34}	[BCL2, BCL2L1, MCL1]	[BCL2, BCL2L1, CAV1, CEACAM5, ITGA5, ITGB1, MCL1, NOTCH1, NTRK2, PDK4, PIK3CA, PTK2, PTRH2, SNAI2, SRC, TLE1, ZNF304]	FALSE
GO:0097194	GO_BiologicalProcess-GOA_23.02.2017_10h01	execution phase of apoptosis	[3, 6]	[Group047, Group050, Group117, Group120, Group122, Group128, Group160, Group161]	5	5.15464	3.85653e-05	0.00296953	{Group047=3.9053239828330067E-10, Group050=8.317822597433291E-20, Group117=9.856959170040014E-12, Group120=1.0480295495135786E-20, Group122=1.1159148140695808E-17, Group128=2.43620398361868E-20, Group160=2.095925753462619E-36, Group161=1.2972628010365007E-28}	{Group047=6.639050770816111E-9, Group050=9.066426631202287E-18, Group117=3.2527965261132046E-10, Group120=1.2471551639211586E-18, Group122=1.0154824808033186E-15, Group128=2.825996620997669E-18, Group160=3.311562690470938E-34, Group161=1.945894201554751E-26}	[BAX, BCL2L1, CASP3, CASP8, TP53]	[ACIN1, ACVR1C, AIFM1, AIFM3, AKT1, APAF1, APC, BAX, BBC3, BCAP31, BCL2L1, BIRC2, BLCAP, BMX, BNIP1, BOK, C16542, CAPN10, CARD18, CASP1, CASP10, CASP12, CASP14, CASP2, CASP3, CASP4, CASP5, CASP6, CASP7, CASP8, CASP9, CDK5RAP3, CDKN2A, CECR2, CEL, CFLAR, CIDEA, CIDEB, CIDEC, CLSPN, CXCR3, DEDD2, DFFA, DFFB, DLC1, DLEC1, DNASE1L3, DNASE2, DNASE2B, DNM1L, DYNLL1, ENDOG, ERN2, ETFA, ETFB, ETFDH, FAP,…	FALSE
GO:0000060	GO_BiologicalProcess-GOA_23.02.2017_10h01	protein import into nucleus, translocation	[5, 6, 7, 8, 9, 10, 11, 12]	[Group062, Group130, Group143, Group147, Group149, Group153, Group156, Group161]	4	8.16327	3.98003e-05	0.00302483	{Group062=4.359779768241478E-20, Group130=8.72359720625284E-19, Group143=1.0304610897274216E-26, Group147=2.219335197191626E-28, Group149=2.409346134030596E-21, Group153=9.632572699614655E-25, Group156=2.39789469623427E-30, Group161=1.2972628010365007E-28}	{Group062=4.970148935795285E-18, Group130=8.549125262127783E-17, Group143=1.4735593583102129E-24, Group147=3.306809443815523E-26, Group149=2.963495744857633E-19, Group153=1.3196624598472077E-22, Group156=3.668778885238433E-28, Group161=1.945894201554751E-26}	[IFNG, IL6, MAPK1, TNF]	[ABRA, AKR1C3, AKT1, ARNTL, BCL3, BCL6, CDK1, CDKN1A, CEP57, GAS6, GCKR, HSP90AB1, IFNG, IGF1, IL6, IPO4, IPO5, JAK2, KPNB1, MAP4K5, MAPK1, MAVS, MBD4, MED1, MT3, NFKBIA, NUTF2, OGG1, OPRD1, OR1D2, PARP10, PDE2A, PHB2, POLA2, PSEN1, RAN, RANBP6, RBM22, SEC61B, SIRT1, SIX3, SLC11A1, TGFB1, TMEM173, TNF, TNPO1, TNPO2, TXN, UBR5]	FALSE
GO:0050766	GO_BiologicalProcess-GOA_23.02.2017_10h01	positive regulation of phagocytosis	[4, 5, 6, 7, 8]	[Group027, Group076, Group084, Group099, Group124, Group127, Group144, Group150, Group152, Group153, Group159, Group161]	4	8.16327	3.98003e-05	0.00302483	{Group027=2.6415810914468555E-9, Group076=5.586511777497201E-15, Group084=9.938191658653112E-14, Group099=5.555412196230995E-16, Group124=7.279489626776259E-30, Group127=9.796760338000124E-17, Group144=3.030093432374026E-28, Group150=6.47380039518465E-25, Group152=3.9478872628846304E-24, Group153=9.632572699614655E-25, Group159=2.3614833448420293E-33, Group161=1.2972628010365007E-28}	{Group027=3.698213528025598E-8, Group076=3.631232655373181E-13, Group084=5.068477745913087E-12, Group099=4.055450903248627E-14, Group124=1.1064824232699913E-27, Group127=7.9353758737801E-15, Group144=4.484538279913559E-26, Group150=8.998582549306663E-23, Group152=5.329647804894251E-22, Group153=1.3196624598472077E-22, Group159=3.6839140179535657E-31, Group161=1.945894201554751E-26}	[CCL2, IL1B, PPARG, TNF]	[ABCA7, ABR, AHSG, ANO6, AZU1, BCR, C2, C3, C4A, C4B, CALR, CAMK1D, CCL2, CD300LF, CD36, CD47, CYBA, DNM2, DOCK2, F2RL1, FCER1G, GAS6, GATA2, HNRNPC, IL1B, ITGA2, ITGAV, LMAN2, MBL2, MERTK, MFGE8, MYO18A, NCKAP1L, PITX3, PPARG, PTX3, PYCARD, RAB27A, RAP1A, RAPGEF1, RN7SL263P, SFTPD, SLC11A1, SPACA3, STAP1, TNF, TUB, TULP1, UXT]	FALSE
GO:0010829	GO_BiologicalProcess-GOA_23.02.2017_10h01	negative regulation of glucose transport	[3, 4, 5, 6, 8, 9, 10]	[Group072, Group105, Group144, Group161]	3	16.6667	4.48493e-05	0.00331885	{Group072=3.6656708819119506E-14, Group105=7.609187719694851E-20, Group144=3.030093432374026E-28, Group161=1.2972628010365007E-28}	{Group072=2.162745820328051E-12, Group105=8.370106491664335E-18, Group144=4.484538279913559E-26, Group161=1.945894201554751E-26}	[IL1B, PRKCB, TNF]	[ENPP1, GRB10, GSK3A, IL1B, INPP5K, LEP, LMBRD1, MYC, MZB1, OSTN, PEA15, PID1, PRKAA1, PRKCB, PVT1, SELENOS, SIRT6, TNF]	FALSE
GO:0051153	GO_BiologicalProcess-GOA_23.02.2017_10h01	regulation of striated muscle cell differentiation	[5, 6, 7]	[Group038, Group044, Group074, Group104, Group106, Group134, Group157, Group161]	5	5	4.46473e-05	0.00334855	{Group038=7.255481590296722E-10, Group044=4.186338009055683E-13, Group074=6.309205599136187E-19, Group104=5.90642690918055E-14, Group106=3.536637698216287E-14, Group134=5.416335777720201E-14, Group157=6.014358351570216E-37, Group161=1.2972628010365007E-28}	{Group038=1.1608770544474755E-8, Group044=1.8838521040750574E-11, Group074=6.435389711118911E-17, Group104=3.2485348000493025E-12, Group106=2.1219826189297723E-12, Group134=3.0331480355233125E-12, Group157=9.562829778996643E-35, Group161=1.945894201554751E-26}	[BCL2, CXCL10, G6PD, IL4, MAPK14]	[ACTN3, AKAP13, AKAP6, ANKRD2, ARRB2, BCL2, BDNF, BDNF-AS, BHLHA15, BHLHE41, BMP10, BMP2, BMP4, CAV3, CCL8, CD53, CEACAM5, CFLAR, CTDP1, CXCL10, CXCL9, CYP26B1, DDX39B, DKK1, DMPK, EDN1, EFNB2, EHD1, EHD2, EZH2, FAM129B, FBXO22, FLOT1, FLT3LG, FRS2, FZD7, G6PD, GDF15, GREM1, GSK3A, GSK3B, HAMP, HDAC4, HDAC5, HDAC9, IGF1, IL4, IL4R, MAML1, MAMSTR, MAPK14, MEF2C, MESP1, MMP14, MORF4L2, MSX1, MTOR, …	FALSE
GO:0032309	GO_BiologicalProcess-GOA_23.02.2017_10h01	icosanoid secretion	[6, 7, 8, 9]	[Group026, Group040, Group058, Group082, Group084, Group161]	4	7.69231	5.04082e-05	0.0036798	{Group026=1.053669339831007E-8, Group040=1.6550600522035983E-11, Group058=1.7223391850378113E-12, Group082=9.778798445098952E-9, Group084=9.938191658653112E-14, Group161=1.2972628010365007E-28}	{Group026=9.483024058479063E-8, Group040=4.4686621409497153E-10, Group058=6.889356740151245E-11, Group082=1.0756678289608847E-7, Group084=5.068477745913087E-12, Group161=1.945894201554751E-26}	[ACE, IL1B, NOS2, PLA2G4A]	[ABCC4, ACE, ACSL4, AGTR2, AMH, ANXA1, BDKRB1, BDKRB2, C00746, C15865, CYP4A11, CYP4F2, DRD2, DRD3, DRD4, EDN1, GPNMB, IL1B, LEP, MAP2K6, MIF, NANOS2, NMB, NMUR2, NOS2, NTSR1, OC90, OXT, P2RX4, P2RX7, PLA2G10, PLA2G12A, PLA2G12B, PLA2G1B, PLA2G2A, PLA2G2C, PLA2G2D, PLA2G2E, PLA2G2F, PLA2G3, PLA2G4A, PLA2G4F, PLA2G5, PLA2G6, PLA2R1, PNPLA8, PROCA1, S100A8, S100A9, SYK, TNFRSF11A, TNFSF11]	FALSE
GO:0060711	GO_BiologicalProcess-GOA_23.02.2017_10h01	labyrinthine layer development	[3, 4, 5, 6, 7, 8, 9]	[Group031]	4	7.69231	5.04082e-05	0.0036798	{Group031=1.01839353956105E-12}	{Group031=4.175413512200305E-11}	[CASP8, GRB2, IL10, MAPK1]	[ADM, AKT1, BIRC6, BMP5, BMP7, C21orf33, CASP8, CDX2, CDX4, CITED1, CYR61, EGLN1, FBXW8, FGFR2, FZD5, GAB1, GCM1, GGNBP2, GJB5, GRB2, GRHL2, HES1, HEY1, HEY2, HS6ST1, IL10, JUNB, LEF1, MAP2K1, MAPK1, NCOA1, NSDHL, OVOL2, PCDH12, PIGU, PLCD1, PLCD3, RBPJ, RNASEH2A, RNU6-664P, RSPO3, SENP2, SOCS3, SPINT2, ST14, SUMO1, TMED2, VASH1, VASH2, WNT2, WNT7B, ZFP36L1]	FALSE
GO:0044130	GO_BiologicalProcess-GOA_23.02.2017_10h01	negative regulation of growth of symbiont in host	[4, 5, 6, 7, 8]	[Group098, Group126, Group130, Group148, Group151, Group161]	3	15.7895	5.31095e-05	0.00382388	{Group098=1.7727505368998016E-13, Group126=5.208615599587011E-13, Group130=8.72359720625284E-19, Group148=7.862789791132838E-14, Group151=5.6806760749081155E-21, Group161=1.2972628010365007E-28}	{Group098=8.509202577119047E-12, Group126=2.2397047078224147E-11, Group130=8.549125262127783E-17, Group148=4.2459064872117324E-12, Group151=6.930424811387901E-19, Group161=1.945894201554751E-26}	[IFNG, IL10, TNF]	[CAMP, CD36, CHAMP1, CTSG, EHHADH, ELANE, IFNG, IL10, IL12B, IRF8, LBP, LTA, MBL2, MPO, MYD88, RPSA, SQSTM1, TIRAP, TNF]	FALSE
GO:1900409	GO_BiologicalProcess-GOA_23.02.2017_10h01	positive regulation of cellular response to oxidative stress	[3, 4, 5, 6, 7]	[Group107, Group121, Group158, Group160, Group161]	3	15.7895	5.31095e-05	0.00382388	{Group107=9.28476033582257E-18, Group121=8.591502166967616E-20, Group158=2.1814444388913482E-30, Group160=2.095925753462619E-36, Group161=1.2972628010365007E-28}	{Group107=8.63482711231499E-16, Group121=9.278822340325026E-18, Group158=3.3594244358926764E-28, Group160=3.311562690470938E-34, Group161=1.945894201554751E-26}	[MCL1, SOD1, TNF]	[CLU, ENDOG, FBXW7, FCAR, FOXO3, HDAC6, LOC654780, MCL1, MMP3, NOX1, PARK7, PAWR, PRKN, RGN, RIPK1, SFPQ, SOD1, TNF, TRPM2]	FALSE
GO:0046854	GO_BiologicalProcess-GOA_23.02.2017_10h01	phosphatidylinositol phosphorylation	[6, 7, 8]	[Group033, Group056, Group140, Group156, Group159, Group161]	5	4.71698	5.90202e-05	0.00419044	{Group033=2.356220841852683E-10, Group056=8.114071639618488E-17, Group140=1.0731331045036508E-17, Group156=2.39789469623427E-30, Group159=2.3614833448420293E-33, Group161=1.2972628010365007E-28}	{Group033=5.183685852075903E-9, Group056=6.734679460883345E-15, Group140=9.872824561433587E-16, Group156=3.668778885238433E-28, Group159=3.6839140179535657E-31, Group161=1.945894201554751E-26}	[EGFR, GRB2, IL6, PIK3CG, PIK3R1]	[BPNT1, BTC, CD19, CD28, CD80, CD86, CLSTN1, EFR3A, EFR3B, EGF, EGFR, ERBB2, ERBB3, ERBB4, EREG, FAM126A, FGF1, FGF10, FGF13, FGF16, FGF17, FGF18, FGF19, FGF2, FGF20, FGF22, FGF23, FGF3, FGF4, FGF5, FGF6, FGF7, FGF8, FGF9, FGFR1, FGFR2, FGFR3, FGFR4, FRS2, FYN, GAB1, GRB2, HBEGF, HGF, ICOS, IL6, IMPA1, IMPA2, IMPAD1, INPP1, IP6K1, IP6K2, IRS1, IRS2, KIT, KITLG, KL, KLB, LCK, MET, NRG1, NRG2, NRG4…	FALSE
GO:0042523	GO_BiologicalProcess-GOA_23.02.2017_10h01	positive regulation of tyrosine phosphorylation of Stat5 protein	[8, 9, 10, 11, 12, 13]	[Group161]	3	15	6.23068e-05	0.00429917	{Group161=1.2972628010365007E-28}	{Group161=1.945894201554751E-26}	[CSF2, IL2, IL4]	[C18200, CSF2, EPO, EPX, ERBB4, FYN, GH1, GHR, IGF1, IL12B, IL2, IL23A, IL23R, IL3, IL31RA, IL4, JAK2, KIT, PECAM1, TIMP1]	FALSE
GO:0043369	GO_BiologicalProcess-GOA_23.02.2017_10h01	CD4-positive or CD8-positive, alpha-beta T cell lineage commitment	[4, 6, 7, 8, 9, 10, 11, 12, 13]	[Group104, Group106, Group121, Group133, Group134, Group160, Group161]	3	15	6.23068e-05	0.00429917	{Group104=5.90642690918055E-14, Group106=3.536637698216287E-14, Group121=8.591502166967616E-20, Group133=6.575467853059808E-19, Group134=5.416335777720201E-14, Group160=2.095925753462619E-36, Group161=1.2972628010365007E-28}	{Group104=3.2485348000493025E-12, Group106=2.1219826189297723E-12, Group121=9.278822340325026E-18, Group133=6.641222531590407E-17, Group134=3.0331480355233125E-12, Group160=3.311562690470938E-34, Group161=1.945894201554751E-26}	[BCL2, IL4, IL6]	[BATF, BCL2, BRAF, CYLD, FOXP3, IL12B, IL12RB1, IL23A, IL23R, IL4, IL6, IRF4, LOXL3, LY9, SHH, SLAMF6, STAT3, STAT6, TNFSF18, ZFPM1]	FALSE
GO:0070498	GO_BiologicalProcess-GOA_23.02.2017_10h01	interleukin-1-mediated signaling pathway	[5, 6, 7]	[Group061, Group086, Group143, Group147, Group149, Group152, Group157, Group161]	3	15	6.23068e-05	0.00429917	{Group061=2.3024050426205298E-26, Group086=1.2095964201304352E-16, Group143=1.0304610897274216E-26, Group147=2.219335197191626E-28, Group149=2.409346134030596E-21, Group152=3.9478872628846304E-24, Group157=6.014358351570216E-37, Group161=1.2972628010365007E-28}	{Group061=3.269415160521152E-24, Group086=9.676771361043482E-15, Group143=1.4735593583102129E-24, Group147=3.306809443815523E-26, Group149=2.963495744857633E-19, Group152=5.329647804894251E-22, Group157=9.562829778996643E-35, Group161=1.945894201554751E-26}	[IL1A, IL6, MAPK3]	[EGR1, IKBKB, IL1A, IL1R1, IL1R2, IL1RL2, IL1RN, IL6, IRAK1, IRAK2, IRAK3, IRAK4, MAPK3, PLCB1, RPS6KA4, RPS6KA5, TNIP2, TRAF6, VRK2, ZNF675]	FALSE
GO:0032680	GO_BiologicalProcess-GOA_23.02.2017_10h01	regulation of tumor necrosis factor production	[5, 6]	[Group030, Group036, Group042, Group098, Group148, Group151, Group159, Group161]	5	4.6729	6.1727e-05	0.00432089	{Group030=6.554902454475491E-13, Group036=1.0299156926148561E-11, Group042=3.087487453903566E-14, Group098=1.7727505368998016E-13, Group148=7.862789791132838E-14, Group151=5.6806760749081155E-21, Group159=2.3614833448420293E-33, Group161=1.2972628010365007E-28}	{Group030=2.7530590308797062E-11, Group036=3.192738647106054E-10, Group042=1.8833673468811752E-12, Group098=8.509202577119047E-12, Group148=4.2459064872117324E-12, Group151=6.930424811387901E-19, Group159=3.6839140179535657E-31, Group161=1.945894201554751E-26}	[CCL2, HSPB1, IFNG, IL10, PIK3R1]	[ADIPOQ, AKAP8, ANGPT1, ARFGEF2, ARHGEF2, ARRB2, AXL, AZU1, BCL3, BPI, C5AR2, CACTIN, CARD9, CCL19, CCL2, CCL3, CCR2, CD14, CD2, CD34, CD36, CHRFAM7A, CHRNA7, CIDEA, CLU, CYBA, CYBB, DEAF1, EHHADH, ERRFI1, FADD, FCER1G, FOXP1, FOXP3, GAS6, GHRL, GHSR, GPNMB, GPR18, GSTP1, HAVCR2, HDAC2, HLA-E, HSF1, HSPB1, HSPD1, IFNG, IL10, IL12B, IL23A, IRAK3, ISL1, JAK2, LBP, LEP, LGALS9, LILRB1, LTF, LY96, MA…	FALSE
GO:2000278	GO_BiologicalProcess-GOA_23.02.2017_10h01	regulation of DNA biosynthetic process	[5, 6, 7, 8]	[Group033, Group078, Group086, Group143, Group144, Group147, Group149, Group153, Group155, Group157, Group159, Group160, Group161]	5	4.62963	6.45287e-05	0.00438795	{Group033=2.356220841852683E-10, Group078=9.848377456993859E-21, Group086=1.2095964201304352E-16, Group143=1.0304610897274216E-26, Group144=3.030093432374026E-28, Group147=2.219335197191626E-28, Group149=2.409346134030596E-21, Group153=9.632572699614655E-25, Group155=1.5800558011000385E-30, Group157=6.014358351570216E-37, Group159=2.3614833448420293E-33, Group160=2.095925753462619E-36, Group161=1…	{Group033=5.183685852075903E-9, Group078=1.1818052948392632E-18, Group086=9.676771361043482E-15, Group143=1.4735593583102129E-24, Group144=4.484538279913559E-26, Group147=3.306809443815523E-26, Group149=2.963495744857633E-19, Group153=1.3196624598472077E-22, Group155=2.4490864917050597E-28, Group157=9.562829778996643E-35, Group159=3.6839140179535657E-31, Group160=3.311562690470938E-34, Group161=1…	[IL6, MAPK1, MAPK3, PPARG, TP53]	[ACD, ACVRL1, ADIPOQ, ANKRD1, ANTXR1, ARHGEF7, ARRB2, ATM, ATR, AURKB, BMPR2, CCT2, CCT3, CCT4, CCT5, CCT6A, CCT7, CCT8, CDKN1A, CERS1, CHTF18, CHTF8, COL26A1, CTC1, CTNNB1, DACH1, DDX39B, DKC1, DNAJC2, DSCC1, DUSP1, DUSP12, FAM129B, FGFR4, GDF2, GJA1, GNL3L, GREM1, GRHL2, HGF, HMBOX1, HNRNPA1, HNRNPA2B1, HNRNPC, HNRNPD, HNRNPU, HSP90AA1, HSP90AB1, IL6, KCNK2, KLF4, MAP2K7, MAP3K4, MAPK1, MAPK15,…	FALSE
GO:0043388	GO_BiologicalProcess-GOA_23.02.2017_10h01	positive regulation of DNA binding	[5]	[Group013, Group032, Group077, Group151, Group160]	4	7.14286	6.75888e-05	0.00446086	{Group013=1.8634867332557528E-13, Group032=1.0612168011302865E-10, Group077=1.4816838565081345E-16, Group151=5.6806760749081155E-21, Group160=2.095925753462619E-36}	{Group013=8.758387646302038E-12, Group032=2.6530420028257164E-9, Group077=1.1705302466414263E-14, Group151=6.930424811387901E-19, Group160=3.311562690470938E-34}	[IFNG, PARP1, PPARG, RB1]	[ACD, C21orf33, CDCA5, CEBPG, CTNNB1, DDRGK1, EDF1, EGF, ERCC2, FOXC1, GATA3, GTF2B, HAND2, HDAC8, HES1, HIPK2, HMGA2, HMGB1, HMGB2, IFNG, IGF1, IRF4, ISL1, ITGA2, JAK2, KAT2A, KLF4, MMP9, MYC, MYOCD, NEUROD1, NME1, PARK7, PARP1, PDHX, PDX1, PINX1, PITX2, PLAUR, POU4F1, POU4F2, PPARG, PRKN, PVT1, RB1, RMRP, SIRT2, SKI, TGFB1, TRAF6, TRIM28, TRIM6, TWIST1, TXN, WAPL, WNT3A]	FALSE
GO:0051817	GO_BiologicalProcess-GOA_23.02.2017_10h01	modification of morphology or physiology of other organism involved in symbiotic interaction	[3, 4]	[Group050, Group117, Group146]	5	4.58716	6.74275e-05	0.00451764	{Group050=8.317822597433291E-20, Group117=9.856959170040014E-12, Group146=5.380402153400938E-28}	{Group050=9.066426631202287E-18, Group117=3.2527965261132046E-10, Group146=7.909191165499379E-26}	[APOE, BCL2L1, CASP8, CD4, SMAD3]	[AKR1C1, ALB, ANXA2, APCS, APOE, AQP1, ATG7, AZU1, BAD, BCL2L1, BCL2L11, C9, CAMP, CASP8, CAV2, CCL3, CCL4, CCL5, CCNK, CCNT1, CD209, CD4, CFL1, CHAMP1, CHD1, CLEC4M, CPSF4, CTDP1, CTSG, DAG1, DAND5, EIF2AK2, EIF2AK4, ELANE, EP300, F2RL1, FBLN1, FMR1, FMR1-IT1, HDAC1, HIPK2, HMGA2, HPN, HSPA8, HYAL2, INPP5K, INSR, ITGAV, JUN, KPNA1, KPNA2, KPNA3, KPNA4, KPNA5, KPNA6, KPNA7, KPNB1, KRT17, LEF1, LT…	FALSE
GO:0042177	GO_BiologicalProcess-GOA_23.02.2017_10h01	negative regulation of protein catabolic process	[4, 5, 6, 7]	[Group015, Group085, Group100, Group110, Group145, Group158, Group159]	5	4.5045	7.35258e-05	0.00463213	{Group015=4.55560379306427E-8, Group085=2.6500112563124555E-15, Group100=1.4518138688106545E-11, Group110=1.095475490592073E-21, Group145=8.291268333444812E-26, Group158=2.1814444388913482E-30, Group159=2.3614833448420293E-33}	{Group015=2.733362275838562E-7, Group085=1.8020076542924697E-13, Group100=4.0650788326698327E-10, Group110=1.3583896083341706E-19, Group145=1.1607775666822736E-23, Group158=3.3594244358926764E-28, Group159=3.6839140179535657E-31}	[EGFR, IL10, NOS2, RELA, SMAD3]	[AGAP2, ALAD, ANXA2, ATP13A2, ATRAID, AZIN1, AZIN2, BAG5, BAG6, BANP, CCAR2, CDK5RAP3, CDKN2A, CLEC16A, CST3, CTSA, DAB2IP, DEDD, DERL2, DERL3, EGFR, ERLEC1, FHIT, FLNA, FMN2, FURIN, FYN, GABARAPL2, GIPC1, GRIN2A, GRIN2C, HFE, HSP90AB1, IL10, INS, IRAK3, KLHL40, LAMP3, LRIG2, MAD2L1, MAD2L2, MDM4, MRPL23, MTM1, N4BP1, NANOS2, NELL1, NOS2, NRG1, OPHN1, OS9, PANO1, PARK7, PBK, PDCL3, PDZD2, PHB, PI…	FALSE
GO:0002902	GO_BiologicalProcess-GOA_23.02.2017_10h01	regulation of B cell apoptotic process	[8, 9]	[Group137, Group140, Group161]	3	14.2857	7.24878e-05	0.00463922	{Group137=1.0770586316843705E-11, Group140=1.0731331045036508E-17, Group161=1.2972628010365007E-28}	{Group137=3.231175895053112E-10, Group140=9.872824561433587E-16, Group161=1.945894201554751E-26}	[BAX, IL10, IL2]	[ADA, AMH, AURKB, BAX, BCL10, BCL6, BTK, CD74, FNIP1, FOXP1, HSH2D, IL10, IL2, IRS2, LYN, MIF, NOC2L, PTEN, S100A8, S100A9, SLC39A10]	FALSE
GO:1902895	GO_BiologicalProcess-GOA_23.02.2017_10h01	positive regulation of pri-miRNA transcription from RNA polymerase II promoter	[7, 8, 9, 10, 11, 12, 13]	[Group015, Group041, Group100, Group102]	3	14.2857	7.24878e-05	0.00463922	{Group015=4.55560379306427E-8, Group041=1.01839353956105E-12, Group100=1.4518138688106545E-11, Group102=5.266614387496279E-16}	{Group015=2.733362275838562E-7, Group041=4.175413512200305E-11, Group100=4.0650788326698327E-10, Group102=3.897294646747246E-14}	[FOS, RELA, SMAD3]	[BMP2, BMP4, BMPR1A, FOS, GARS, GNL3, HIF1A, JUN, NGFR, PDGFB, RELA, SMAD1, SMAD3, SMAD6, SMARCA4, SPI1, SRF, STAT3, TEAD1, TERT, TGFB1]	FALSE
GO:0045600	GO_BiologicalProcess-GOA_23.02.2017_10h01	positive regulation of fat cell differentiation	[4, 5, 6, 7]	[Group044, Group055, Group142, Group159, Group161]	4	7.01754	7.24764e-05	0.00471097	{Group044=4.186338009055683E-13, Group055=1.6001975949374276E-14, Group142=7.17431876360572E-19, Group159=2.3614833448420293E-33, Group161=1.2972628010365007E-28}	{Group044=1.8838521040750574E-11, Group055=1.0081244848105795E-12, Group142=7.174318763605721E-17, Group159=3.6839140179535657E-31, Group161=1.945894201554751E-26}	[CREB1, MAPK14, PPARG, PTGS2]	[AAMDC, ADIG, ADIRF, AKT1, ASXL2, BMP2, CARM1, CCDC3, CEBPA, CEBPB, CMKLR1, CREB1, CREBL2, DKKL1, FNDC5, FRZB, GDF3, HTR2A, HTR2C, ID2, INS, KLF5, LMO3, LRP5, MAPK14, MEDAG, METRNL, NOCT, PPARD, PPARG, PRDM16, PTGS2, RARRES2, SAV1, SFRP1, SFRP2, SH3PXD2B, SNAI2, STK24, STK3, STK4, SULT1E1, TMEM64, TPH1, TRPM4, VSTM2A, WDFY2, WIF1, WNT5B, XBP1, XBP1P1, ZBTB16, ZBTB7C, ZC3H12A, ZFP36, ZFP36L1, ZNF3…	FALSE
GO:0048247	GO_BiologicalProcess-GOA_23.02.2017_10h01	lymphocyte chemotaxis	[4, 6, 7, 8]	[Group094, Group127, Group150, Group154]	4	7.01754	7.24764e-05	0.00471097	{Group094=1.4395324297023587E-22, Group127=9.796760338000124E-17, Group150=6.47380039518465E-25, Group154=1.203528415039811E-23}	{Group094=1.813810861424972E-20, Group127=7.9353758737801E-15, Group150=8.998582549306663E-23, Group154=1.6006927920029487E-21}	[CCL2, CXCL10, CXCL11, PIK3CG]	[ADAM10, ADAM17, ADAM8, CCL1, CCL11, CCL13, CCL14, CCL15, CCL15-CCL14, CCL16, CCL17, CCL18, CCL19, CCL2, CCL20, CCL21, CCL22, CCL23, CCL24, CCL25, CCL26, CCL3, CCL3L1, CCL4, CCL4L1, CCL5, CCL7, CCL8, CCR2, CH25H, CKLF, CLSTN1, CX3CL1, CXCL10, CXCL11, CXCL13, CXCL14, CXCL16, CXCL9, CXCR3, CYP7B1, GAS6, GPR183, HSD3B7, KLF5, KLRK1, PADI2, PIK3CD, PIK3CG, PTK2B, S100A7, SAA1, TMEM102, TNFSF14, WNT5A…	FALSE
GO:2000378	GO_BiologicalProcess-GOA_23.02.2017_10h01	negative regulation of reactive oxygen species metabolic process	[4, 5, 6]	[Group038, Group106, Group134, Group161]	4	7.01754	7.24764e-05	0.00471097	{Group038=7.255481590296722E-10, Group106=3.536637698216287E-14, Group134=5.416335777720201E-14, Group161=1.2972628010365007E-28}	{Group038=1.1608770544474755E-8, Group106=2.1219826189297723E-12, Group134=3.0331480355233125E-12, Group161=1.945894201554751E-26}	[BCL2, G6PD, IL10, IL4]	[AATF, ATG5, ATP2B4, BCL2, BCR, BECN1, BNIP3, BRCA1, CAV1, CD34, CFLAR, CRYAB, DLC1, G6PD, GLA, HDAC6, HIF1A, HK2, HOOK2, HP, HPR, HSP90B2P, HSPD1, IL10, IL4, KCNA5, KHSRP, KIF2A, MMP3, MPV17L, MT3, MYCN, NAT8, OPRM1, PAX2, PINK1, PLIN5, PON3, PRKN, PTGIS, RGN, RN7SL263P, SIRT2, SIRT3, SIRT5, SLC18A2, SLC30A10, STAT3, TFAP2A, TGFBRAP1, TIGAR, TRAP1, TSPO, UBL4A, VDAC1, WDR35, ZC3H12A]	FALSE
GO:0043535	GO_BiologicalProcess-GOA_23.02.2017_10h01	regulation of blood vessel endothelial cell migration	[5, 6, 7, 8, 9, 10]	[Group071, Group146]	4	6.89655	7.76166e-05	0.00481223	{Group071=2.8660833297684307E-15, Group146=5.380402153400938E-28}	{Group071=1.9202758309448486E-13, Group146=7.909191165499379E-26}	[APOE, HSPB1, PRKCA, PTGS2]	[ACVRL1, AGTR2, AKT1, AMOT, AMOTL1, ANGPT1, ANGPT2, ANGPT4, APOE, ATP5A1, ATP5B, CIB1, CSNK2B, DLL4, EFNA1, EPHA2, FGF13, FGF2, FOXC2, GDF2, HDAC5, HDAC7, HDAC9, HMGB1, HRG, HSPB1, ITGB1BP1, KLF4, MAP2K5, MEOX2, MMRN2, NF1, NFE2L2, NOTCH1, NR2E1, NRG1, P2RX4, PDCD10, PDGFB, PLCG1, PLG, PRCP, PRKCA, PRKD1, PRKD2, PTGS2, RGCC, RHOA, SH3BGRL3, SRPX2, STARD13, STAT5A, TGFB1, THBS1, TMSB4X, VASH1, VEG…	FALSE
GO:0030828	GO_BiologicalProcess-GOA_23.02.2017_10h01	positive regulation of cGMP biosynthetic process	[7, 8, 9, 10, 11, 12, 13]	[Group082, Group146, Group154, Group158]	3	13.6364	8.36983e-05	0.0048545	{Group082=9.778798445098952E-9, Group146=5.380402153400938E-28, Group154=1.203528415039811E-23, Group158=2.1814444388913482E-30}	{Group082=1.0756678289608847E-7, Group146=7.909191165499379E-26, Group154=1.6006927920029487E-21, Group158=3.3594244358926764E-28}	[APOE, NOS2, NOS3]	[ADNP, ADORA2B, APOE, GUCA1A, GUCA1B, GUCA1C, GUCA2A, GUCA2B, GUCY1A2, GUCY1A3, MTNR1A, NANOS1, NANOS2, NANOS3, NOS1, NOS2, NOS3, NPPC, NPR1, OSTN, RCVRN, RUNDC3A]	FALSE
GO:0019079	GO_BiologicalProcess-GOA_23.02.2017_10h01	viral genome replication	[4, 5, 6]	[Group027, Group158, Group161]	5	4.42478	8.00408e-05	0.00488249	{Group027=2.6415810914468555E-9, Group158=2.1814444388913482E-30, Group161=1.2972628010365007E-28}	{Group027=3.698213528025598E-8, Group158=3.3594244358926764E-28, Group161=1.945894201554751E-26}	[BCL2, CCL2, CXCL8, PPIA, TNF]	[ADAR, ADARB1, APOBEC3A, APOBEC3C, APOBEC3D, APOBEC3F, APOBEC3G, APOBEC3H, ATG16L1, ATG16L2, ATG5, BANF1, BCL2, BST2, BTBD17, CCL2, CCL5, CCNK, CD209, CD28, CDC42, CLEC4M, CTBP1, CTBP2, CXCL8, CXCR6, DDB1, DDX3X, DDX5, DEK, EEA1, EIF2AK2, EIF2AK4, FAM111A, FKBP6, FMR1, FMR1-IT1, GAS6, GRK2, HACD3, HMGA2, HSPA8, HTATSF1, IFI16, IFIT1, IFITM1, IFITM2, IFITM3, IFNB1, IFNL3, ILF3, INPP5K, ISG15, ISG2…	FALSE
GO:0042633	GO_BiologicalProcess-GOA_23.02.2017_10h01	hair cycle	[4]	[Group070, Group073, Group083, Group085, Group096, Group112, Group139, Group156, Group158, Group161]	5	4.38596	8.34605e-05	0.00492417	{Group070=7.878512232929875E-18, Group073=3.0729508041895474E-17, Group083=9.283507481187041E-23, Group085=2.6500112563124555E-15, Group096=5.896738035562535E-21, Group112=2.0443419021937814E-23, Group139=2.373309952007317E-19, Group156=2.39789469623427E-30, Group158=2.1814444388913482E-30, Group161=1.2972628010365007E-28}	{Group070=7.405801498954083E-16, Group073=2.6427376916030108E-15, Group083=1.1882889575919413E-20, Group085=1.8020076542924697E-13, Group096=7.135053023030667E-19, Group112=2.6780878918738537E-21, Group139=2.5157085491277562E-17, Group156=3.668778885238433E-28, Group158=3.3594244358926764E-28, Group161=1.945894201554751E-26}	[BCL2, EGFR, PTGS2, RELA, TNF]	[AARS, ACVR1B, ALX4, APCDD1, ARNTL, ATP7A, BCL2, CD109, CDC42, CDH15, CDH3, CELSR1, CLOCK, CTNNB1, CTSV, DKK1, DKK4, DNASE1L2, DSG4, EDA, EDAR, EGFR, ERCC2, FA2H, FARP2, FERMT1, FGF10, FGF7, FGFR2, FOXE1, FOXN1, FOXQ1, FST, FUZ, FZD3, FZD6, FZD9, GAL, GNAS, GORAB, HDAC1, HDAC2, HOXC13, HPSE, IGFBP5, INHBA, INTU, KRT14, KRT16, KRT17, KRT25, KRT27, KRT33B, KRT71, KRT83, KRT84, KRTAP4-3, KRTAP4-5, K…	FALSE
GO:0033627	GO_BiologicalProcess-GOA_23.02.2017_10h01	cell adhesion mediated by integrin	[3]	[Group009, Group127, Group161]	4	6.77966	8.3017e-05	0.00498102	{Group009=2.4654074502560813E-10, Group127=9.796760338000124E-17, Group161=1.2972628010365007E-28}	{Group009=5.177355645537771E-9, Group127=7.9353758737801E-15, Group161=1.945894201554751E-26}	[DPP4, ICAM1, PIK3CG, SERPINE1]	[ACER2, ADA, ADAM17, ADAM9, C1orf168, CCL21, CCL5, CIB1, COL16A1, CXCL13, CYP1B1, DPP4, EFNA1, EPHA2, EPHA8, FBN1, FERMT1, FERMT3, FOXC2, HRG, ICAM1, IFT74, ITGA11, ITGA2, ITGA5, ITGA6, ITGAV, ITGB1, ITGB1BP1, ITGB3, ITGB6, LPXN, LYN, MUC1, NCKAP1L, NCOA3, NOV, NPNT, NRG1, PDE3B, PIEZO1, PIK3CG, PLAU, PLXNA1, PODXL, PTK2, PTPN11, PTPN6, RAC3, RET, RPL10, SERPINE1, SFRP2, SNAI2, SWAP70, SYK, TESC,…	FALSE
GO:0050672	GO_BiologicalProcess-GOA_23.02.2017_10h01	negative regulation of lymphocyte proliferation	[5, 6, 7, 8]	[Group137, Group161]	3	4.34783	0.00249729	0.00499459	{Group137=1.0770586316843705E-11, Group161=1.2972628010365007E-28}	{Group137=3.231175895053112E-10, Group161=1.945894201554751E-26}	[CASP3, IL10, IL2]	[ATM, BMP4, BTK, BTN2A2, CASP3, CD274, CD300A, CDKN2A, CEBPB, CLEC4G, CTLA4, DEAF1, DLG1, ERBB2, FOXJ1, FOXP3, GAL, GLMN, GNRH1, GPNMB, HAVCR2, HLA-DRB1, HLA-G, IDO1, IHH, IL10, IL2, IL20RB, IL2RA, INPP5D, ITCH, KIAA0922, LGALS9, LILRB1, LILRB2, LOC105369230, LRRC32, LST1, LYN, MAD1L1, MARCH7, MNDA, NDFIP1, NFKBIL1, PAWR, PDCD1LG2, PDE5A, PELI1, PKN1, PLA2G2D, PLA2G2F, PRDM1, PRKAR1A, PRNP, PTPN6…	FALSE
GO:0034101	GO_BiologicalProcess-GOA_23.02.2017_10h01	erythrocyte homeostasis	[3, 6]	[Group038, Group043, Group044, Group074, Group131]	5	4.31034	9.06366e-05	0.00516629	{Group038=7.255481590296722E-10, Group043=7.255481590296722E-10, Group044=4.186338009055683E-13, Group074=6.309205599136187E-19, Group131=8.965170180080678E-17}	{Group038=1.1608770544474755E-8, Group043=1.1608770544474755E-8, Group044=1.8838521040750574E-11, Group074=6.435389711118911E-17, Group131=7.351439547666156E-15}	[CASP3, G6PD, HMOX1, MAPK14, RB1]	[ACIN1, ACVR1B, ACVR2A, ADAR, ADD1, AHSP, ALAS2, AMPD3, ANKRD54, ARID4A, ARNT, ATPIF1, AXL, B2M, BCL6, BMP4, C18200, C19313, CASP3, CDK6, CEBPG, DMTN, DNASE2, DYRK3, EPAS1, EPB42, EPO, EPX, ERCC2, ETS1, ETV2, FLVCR1, FOXO3, G6PD, GAS2L1, GATA1, GATA2, GATA3, GNPDA1, GPI, HBZ, HCLS1, HIF1A, HIPK2, HMGB2, HMOX1, HOXA5, HOXB6, HSPA9, ID2, IKZF1, INHA, INHBA, INPP5D, IREB2, ISG15, JAK2, JAK3, JMJD6, …	FALSE
GO:0002719	GO_BiologicalProcess-GOA_23.02.2017_10h01	negative regulation of cytokine production involved in immune response	[4, 5, 6, 7]	[Group093, Group151, Group159, Group161]	3	13.0435	9.59837e-05	0.0052791	{Group093=6.491736171405106E-16, Group151=5.6806760749081155E-21, Group159=2.3614833448420293E-33, Group161=1.2972628010365007E-28}	{Group093=4.674050043411676E-14, Group151=6.930424811387901E-19, Group159=3.6839140179535657E-31, Group161=1.945894201554751E-26}	[HMOX1, IL10, TNF]	[ANGPT1, APOA1, APOA2, BCL6, BST2, CD96, CUEDC2, FOXP3, HFE, HMOX1, IFNA2, IFNB1, IL10, IRAK3, JAK3, LILRB1, LPAL2, SLAMF1, TGFB1, TGFB2, TGFB3, TNF, XCL1]	FALSE
GO:0019430	GO_BiologicalProcess-GOA_23.02.2017_10h01	removal of superoxide radicals	[4, 5, 7, 8]	[Group107, Group155, Group158, Group160, Group161]	3	13.0435	9.59837e-05	0.0052791	{Group107=9.28476033582257E-18, Group155=1.5800558011000385E-30, Group158=2.1814444388913482E-30, Group160=2.095925753462619E-36, Group161=1.2972628010365007E-28}	{Group107=8.63482711231499E-16, Group155=2.4490864917050597E-28, Group158=3.3594244358926764E-28, Group160=3.311562690470938E-34, Group161=1.945894201554751E-26}	[NOS3, SOD1, TNF]	[APOA4, ATP7A, BMP7, CCS, CD36, DHFR, FBLN5, GCH1, MPO, MT3, NANOS3, NFE2L2, NOS3, NQO1, PARK7, PRDX1, PRDX2, RGN, SOD1, SOD2, SOD3, SZT2, TNF]	FALSE
GO:0046827	GO_BiologicalProcess-GOA_23.02.2017_10h01	positive regulation of protein export from nucleus	[4, 5, 6, 7, 8, 9, 10, 11]	[Group084]	3	13.0435	9.59837e-05	0.0052791	{Group084=9.938191658653112E-14}	{Group084=5.068477745913087E-12}	[IL1B, PRKCA, TP53]	[ANP32B, BAG3, CAMK1, CTDSPL2, EMD, GAS6, GSK3B, GTSE1, IL1B, MDM2, PPM1A, PRKACA, PRKCA, RAPGEF3, REXO2, RIOK2, SFN, TCF7L2, TP53, TP53BP1, TPR, XPO4, YWHAE]	FALSE
GO:0030804	GO_BiologicalProcess-GOA_23.02.2017_10h01	positive regulation of cyclic nucleotide biosynthetic process	[6, 7, 8, 9, 10, 11]	[Group035, Group045, Group063, Group071, Group146, Group154, Group158, Group161]	5	4.2735	9.43981e-05	0.00528629	{Group035=3.855205702182162E-15, Group045=3.066582739010323E-17, Group063=1.691568844596322E-11, Group071=2.8660833297684307E-15, Group146=5.380402153400938E-28, Group154=1.203528415039811E-23, Group158=2.1814444388913482E-30, Group161=1.2972628010365007E-28}	{Group035=2.5444357634402266E-13, Group045=2.667926982938981E-15, Group063=4.398078995950437E-10, Group071=1.9202758309448486E-13, Group146=7.909191165499379E-26, Group154=1.6006927920029487E-21, Group158=3.3594244358926764E-28, Group161=1.945894201554751E-26}	[APOE, CALM1, NOS2, NOS3, PRKCA]	[ABCA1, ACR, ADCY1, ADCY2, ADCY3, ADCY4, ADCY5, ADCY6, ADCY7, ADCY8, ADCY9, ADCYAP1, ADCYAP1R1, ADGRD1, ADGRG6, ADM, ADNP, ADORA2A, ADORA2B, ADORA3, ADRB1, ADRB2, ADRB3, AKAP12, AKAP5, APOE, AVP, AVPR2, C13662, C16051, C16079, C16119, CACNA1A, CALCA, CALCR, CALCRL, CALM1, CAP1, CAP2, CPAMD8, CRH, CRHR1, DRD1, DRD5, EDNRA, FLNB, FSHR, GCG, GHRH, GHRHR, GIPR, GLP1R, GNAL, GNAS, GPER1, GPHA2, GPHB5,…	FALSE
GO:0010827	GO_BiologicalProcess-GOA_23.02.2017_10h01	regulation of glucose transport	[4, 5, 8, 9]	[Group074, Group105, Group144, Group161]	5	4.20168	0.00010228	0.00552314	{Group074=6.309205599136187E-19, Group105=7.609187719694851E-20, Group144=3.030093432374026E-28, Group161=1.2972628010365007E-28}	{Group074=6.435389711118911E-17, Group105=8.370106491664335E-18, Group144=4.484538279913559E-26, Group161=1.945894201554751E-26}	[IL1B, MAPK14, PIK3R1, PRKCB, TNF]	[AAAS, ADIPOQ, ADIPOR2, AGT, AGXT, AKT1, AKT2, APPL1, ARPP19, ASPSCR1, C15906, C16051, C1QTNF1, C1QTNF12, C1QTNF2, C2CD5, C3, CAPN10, CLIP3, CLTCL1, CREBL2, ENPP1, FFAR3, FFAR4, FGF19, FGF21, GCK, GCKR, GIP, GNAI2, GPC3, GRB10, GSK3A, HK2, HOOK2, IGF1, IL1B, INPP5K, INS, INSR, IRS1, IRS2, ITLN1, KCNA5, KIF2A, LEP, LMBRD1, MAP4K2, MAP4K5, MAPK14, MYC, MZB1, NDC1, NFE2L2, NGFR, NR1H4, NR4A3, NUP107…	FALSE
GO:0045580	GO_BiologicalProcess-GOA_23.02.2017_10h01	regulation of T cell differentiation	[6, 7, 8, 9, 10, 11]	[Group131, Group138, Group140, Group161]	5	4.20168	0.00010228	0.00552314	{Group131=8.965170180080678E-17, Group138=2.2350029818032858E-20, Group140=1.0731331045036508E-17, Group161=1.2972628010365007E-28}	{Group131=7.351439547666156E-15, Group138=2.6149534887098442E-18, Group140=9.872824561433587E-16, Group161=1.945894201554751E-26}	[IFNG, IL2, IL4, IL6, SOD1]	[ADA, ADAM8, ANXA1, AP3B1, AP3D1, BAD, BCL6, BMP4, BRAF, C00870, CAMK4, CARD11, CCL19, CD2, CD27, CD28, CD46, CD74, CD80, CD83, CD86, CDKN2A, CLPTM1, CTLA4, CYLD, CYP26B1, DROSHA, DTX1, EGR3, ERBB2, FANCA, FANCD2, FOXJ1, FOXN1, FOXP3, GATA3, GLI2, GLI3, HLA-DOA, HLA-G, HLX, HMGB1, IFNA2, IFNB1, IFNG, IFNL1, IHH, IL12A, IL12B, IL12RB1, IL15, IL18, IL1RL2, IL2, IL23A, IL23R, IL27, IL2RA, IL36B, IL4…	FALSE
GO:0010634	GO_BiologicalProcess-GOA_23.02.2017_10h01	positive regulation of epithelial cell migration	[3, 4, 5, 6, 7, 8, 9]	[Group057, Group071]	5	4.16667	0.000106406	0.00563953	{Group057=4.253617063750937E-13, Group071=2.8660833297684307E-15}	{Group057=1.8715915080504124E-11, Group071=1.9202758309448486E-13}	[HSPB1, IFNG, PRKCA, PRKCE, PTGS2]	[AAMP, ADAM9, ADGRA2, AGT, AGXT, AKT1, ALOX12, AMOT, AMOTL1, ANGPT1, ANGPT4, ANXA3, ATOH8, ATP5A1, ATP5B, BCAR1, BCAS3, BMP4, BMPR2, CALR, CAPN7, CCBE1, CCR6, CIB1, CLASP1, CLASP2, CTSH, DOCK1, DOCK5, EDN1, ENPP2, EPB41L4B, EPB41L5, ETS1, FGF1, FGF10, FGF13, FGF16, FGF18, FGF2, FGF7, FGFR1, FLT4, FOXC2, FOXP1, GATA3, GLIPR2, GPLD1, HAS2, HBEGF, HDAC6, HDAC7, HDAC9, HIF1A, HSPB1, HYAL1, IFNG, INSL…	FALSE
GO:0002548	GO_BiologicalProcess-GOA_23.02.2017_10h01	monocyte chemotaxis	[4, 6, 7, 8]	[Group079, Group094, Group150, Group152, Group154, Group157, Group159]	4	6.25	0.000114205	0.00593867	{Group079=8.893212916361293E-15, Group094=1.4395324297023587E-22, Group150=6.47380039518465E-25, Group152=3.9478872628846304E-24, Group154=1.203528415039811E-23, Group157=6.014358351570216E-37, Group159=2.3614833448420293E-33}	{Group079=5.691656266471228E-13, Group094=1.813810861424972E-20, Group150=8.998582549306663E-23, Group152=5.329647804894251E-22, Group154=1.6006927920029487E-21, Group157=9.562829778996643E-35, Group159=3.6839140179535657E-31}	[CCL2, CXCL10, IL6, SERPINE1]	[AIF1, ANO6, ANXA1, CALCA, CCL1, CCL11, CCL13, CCL14, CCL15, CCL15-CCL14, CCL16, CCL17, CCL18, CCL19, CCL2, CCL20, CCL21, CCL22, CCL23, CCL24, CCL25, CCL26, CCL3, CCL3L1, CCL4, CCL4L1, CCL5, CCL7, CCL8, CCR1, CCR2, CREB3, CREB3L4, CX3CL1, CXCL10, CXCL12, CXCL17, FLT1, GREM1, HMGB1, IL6, IL6R, LGALS3, LYN, NBL1, NOV, PDGFB, PLA2G7, PLXNA1, PTPRO, PTPRU, RPL10, RPS19, S100A11P1, S100A12, S100A14, S…	FALSE
GO:0071482	GO_BiologicalProcess-GOA_23.02.2017_10h01	cellular response to light stimulus	[5]	[Group096, Group128, Group160]	5	4.06504	0.000119555	0.00609729	{Group096=5.896738035562535E-21, Group128=2.43620398361868E-20, Group160=2.095925753462619E-36}	{Group096=7.135053023030667E-19, Group128=2.825996620997669E-18, Group160=3.311562690470938E-34}	[BAX, CALM1, PIK3R1, PTGS2, TP53]	[ACTR5, AKT2, ANTXR1, AQP1, ATF4, ATR, AURKB, BAK1, BAX, BMF, CALM1, CAMKMT, CASP9, CDC25A, CDKN1A, CERS1, CHEK1, CNGA1, CNGB1, CNRIP1, COPS9, CREBBP, CRIP1, CRY1, CRY2, CUL4B, DDB1, DDB2, DMBT1, EIF2AK4, EIF2S1, EP300, ERCC1, ERCC4, FBXW7, FMR1, FMR1-IT1, FNTA, FNTB, GNAT1, GNB1, GNGT1, GRK1, GRK4, GRK7, GUCA1A, GUCA1B, GUCA1C, GUCY2D, GUCY2F, HIST3H2A, HYAL1, HYAL2, HYAL3, IMPACT, INO80, KDM1A,…	FALSE
GO:0010894	GO_BiologicalProcess-GOA_23.02.2017_10h01	negative regulation of steroid biosynthetic process	[5, 6, 7, 8]	[Group108, Group125, Group158, Group161]	3	12	0.000123958	0.00619788	{Group108=1.0260577003899081E-11, Group125=7.480942316253816E-16, Group158=2.1814444388913482E-30, Group161=1.2972628010365007E-28}	{Group108=3.283384641247706E-10, Group125=5.311469044540209E-14, Group158=3.3594244358926764E-28, Group161=1.945894201554751E-26}	[APOE, NFKB1, SOD1]	[APOE, ATP1A1, ATP1A3, ATP1A4, BMP2, BMP5, CYP27B1, DKK3, ERLIN1, ERLIN2, FGF19, GFI1, INSIG1, INSIG2, MALRD1, NFKB1, NR1H4, PROX1, REST, SCAP, SH2D2A, SNAI1, SNAI2, SOD1, WNT4]	FALSE
GO:0050995	GO_BiologicalProcess-GOA_23.02.2017_10h01	negative regulation of lipid catabolic process	[4, 5, 6, 7]	[Group127, Group161]	3	12	0.000123958	0.00619788	{Group127=9.796760338000124E-17, Group161=1.2972628010365007E-28}	{Group127=7.9353758737801E-15, Group161=1.945894201554751E-26}	[IL1B, PIK3CG, TNF]	[ACACB, ADORA1, ADRA2A, AKT1, APOA2, APOC1, APOC3, BSCL2, CIDEA, CNR1, CRTC3, ETFBKMT, FMC1, GPLD1, HCAR2, IL1B, INS, LPAL2, PCDHA4, PCDHA@, PDE3B, PIK3CG, PLIN5, PRKAA1, TNF]	FALSE
GO:0060396	GO_BiologicalProcess-GOA_23.02.2017_10h01	growth hormone receptor signaling pathway	[6, 7, 8, 9]	[Group033, Group053, Group078, Group143, Group149]	3	12	0.000123958	0.00619788	{Group033=2.356220841852683E-10, Group053=9.576111518151522E-14, Group078=9.848377456993859E-21, Group143=1.0304610897274216E-26, Group149=2.409346134030596E-21}	{Group033=5.183685852075903E-9, Group053=4.979577989438792E-12, Group078=1.1818052948392632E-18, Group143=1.4735593583102129E-24, Group149=2.963495744857633E-19}	[MAPK1, MAPK3, PIK3R1]	[C18201, CSH1, GH1, GH2, GHR, GHRL, HNF4A, JAK2, JAK3, LEPROT, LYN, MAPK1, MAPK3, MBD5, PIK3R1, PRL, PRLR, PTK2, PTPN1, PXDN, PXN, SOCS2, STAT3, STAT5A, STAT5B]	FALSE
GO:0010922	GO_BiologicalProcess-GOA_23.02.2017_10h01	positive regulation of phosphatase activity	[6, 7, 8, 9]	[Group008, Group148, Group161]	3	11.5385	0.000139734	0.00684696	{Group008=1.873217718010227E-8, Group148=7.862789791132838E-14, Group161=1.2972628010365007E-28}	{Group008=1.3112524026071587E-7, Group148=4.2459064872117324E-12, Group161=1.945894201554751E-26}	[CALM1, IFNG, SMAD3]	[AGTR2, AKAP6, BMP2, CALM1, CD300A, CHP2, GPLD1, HSP90AB1, IFNG, ITGA1, ITGA2, JAK2, MAGI2, MEF2C, NPNT, PDGFRB, PLEK, PPARGC1B, PPP1R12A, PPP1R15A, PTPA, RGN, RIPK3, SLC39A10, SMAD3, VRK3]	FALSE
GO:0045844	GO_BiologicalProcess-GOA_23.02.2017_10h01	positive regulation of striated muscle tissue development	[4, 5, 6, 7, 8, 9]	[Group044, Group055, Group095, Group104, Group106]	3	4.47761	0.00229608	0.00688824	{Group044=4.186338009055683E-13, Group055=1.6001975949374276E-14, Group095=7.872064311268882E-19, Group104=5.90642690918055E-14, Group106=3.536637698216287E-14}	{Group044=1.8838521040750574E-11, Group055=1.0081244848105795E-12, Group095=7.793343668156193E-17, Group104=3.2485348000493025E-12, Group106=2.1219826189297723E-12}	[BCL2, CREB1, MAPK14]	[ACTN3, AKAP6, ARNTL, ARRB2, BCL2, BMP10, BMP4, BMPR1A, CCNB1, CDK1, CDON, CREB1, CTNNB1, CYP26B1, DDX39B, DLL1, EDN1, EFNB2, ERBB3, ERBB4, FAM129B, FGF13, FGF2, FGF9, FGFR1, FGFR2, FLOT1, GATA6, GPC1, GREM1, GSK3B, HAMP, HEY2, HMGCR, IGF1, LONP1, MAPK14, MEF2C, MKL2, MTM1, MTOR, MYF5, MYF6, MYOCD, MYOD1, MYOG, NACA, NOTCH1, NRG1, PDZD2, PIM1, PIN1, PRKAA1, RBPJ, RPS6KB1, SHH, SHOX2, SOX17, TBX1,…	FALSE
GO:0015909	GO_BiologicalProcess-GOA_23.02.2017_10h01	long-chain fatty acid transport	[6, 7, 8, 9, 10]	[Group026, Group040, Group076, Group082, Group125]	4	5.7971	0.000153124	0.00734993	{Group026=1.053669339831007E-8, Group040=1.6550600522035983E-11, Group076=5.586511777497201E-15, Group082=9.778798445098952E-9, Group125=7.480942316253816E-16}	{Group026=9.483024058479063E-8, Group040=4.4686621409497153E-10, Group076=3.631232655373181E-13, Group082=1.0756678289608847E-7, Group125=5.311469044540209E-14}	[ACE, APOE, PLA2G4A, PPARG]	[ABCD1, ABCD2, ABCD3, ACACA, ACACB, ACE, ACSL1, ACSL3, AKT1, AKT2, AMH, ANXA1, APOE, BDKRB1, BDKRB2, C15865, CD36, CPT1A, CPT1B, CPT2, DRD2, DRD3, DRD4, FABP1, FABP3, GPNMB, IRS2, LCN1, LCN12, MID1IP1, MIF, NMB, NMUR2, NTSR1, OC90, PLA2G10, PLA2G12A, PLA2G12B, PLA2G1B, PLA2G2A, PLA2G2C, PLA2G2D, PLA2G2E, PLA2G2F, PLA2G3, PLA2G4A, PLA2G4F, PLA2G5, PLA2G6, PLA2R1, PLIN2, PNPLA8, PPARG, PRKAA2, PRKA…	FALSE
GO:0061045	GO_BiologicalProcess-GOA_23.02.2017_10h01	negative regulation of wound healing	[4, 5, 6, 7]	[Group046, Group050, Group063, Group146, Group158]	4	5.7971	0.000153124	0.00734993	{Group046=1.7206874458711569E-15, Group050=8.317822597433291E-20, Group063=1.691568844596322E-11, Group146=5.380402153400938E-28, Group158=2.1814444388913482E-30}	{Group046=1.2044812121098097E-13, Group050=9.066426631202287E-18, Group063=4.398078995950437E-10, Group146=7.909191165499379E-26, Group158=3.3594244358926764E-28}	[APOE, NOS3, SERPINE1, SMAD3]	[ABAT, ADAMTS18, AGER, ALOX12, ANXA2, APCS, APOE, APOH, C1QTNF1, CASK, CD109, CD34, CEACAM1, CEL, CLASP1, CLASP2, CPB2, CRK, EDN1, EPPK1, F11, F12, F2, FAP, FGA, FGB, FGF13, FGF2, FGG, GJA1, GLMN, GP1BA, HMGCR, HRG, KLKB1, KNG1, KRT1, NANOS3, NOS3, NRG1, PDGFA, PDGFB, PDGFRA, PHLDB2, PLAT, PLAU, PLAUR, PLG, PRKCD, PRKG1, PROC, PROS1, PROZ, SERPINB2, SERPINE1, SERPINE2, SERPINF2, SERPING1, SMAD3, …	FALSE
GO:0090322	GO_BiologicalProcess-GOA_23.02.2017_10h01	regulation of superoxide metabolic process	[5, 6]	[Group107, Group155, Group156, Group158, Group161]	3	11.1111	0.000156761	0.00736777	{Group107=9.28476033582257E-18, Group155=1.5800558011000385E-30, Group156=2.39789469623427E-30, Group158=2.1814444388913482E-30, Group161=1.2972628010365007E-28}	{Group107=8.63482711231499E-16, Group155=2.4490864917050597E-28, Group156=3.668778885238433E-28, Group158=3.3594244358926764E-28, Group161=1.945894201554751E-26}	[EGFR, SOD1, TNF]	[AATF, AGT, AGXT, BMP7, BST1, CD36, CRP, CSRP1, CYBA, DHFR, EGFR, F2RL1, FBLN5, GCH1, GSTP1, MAPT, NFE2L2, PARK7, PON3, PPIAP10, PRKCD, RGN, SOD1, SYK, SZT2, TGFB1, TNF]	FALSE
GO:0010575	GO_BiologicalProcess-GOA_23.02.2017_10h01	positive regulation of vascular endothelial growth factor production	[4, 5, 6]	[Group054, Group099, Group111, Group152, Group161]	3	10.7143	0.000175081	0.00805374	{Group054=3.353524727928328E-13, Group099=5.555412196230995E-16, Group111=1.595395626325167E-17, Group152=3.9478872628846304E-24, Group161=1.2972628010365007E-28}	{Group054=1.542621374847031E-11, Group099=4.055450903248627E-14, Group111=1.4358560636926502E-15, Group152=5.329647804894251E-22, Group161=1.945894201554751E-26}	[IL1A, IL1B, PTGS2]	[ADORA2B, ARNT, ATF4, BRCA1, C3, C3AR1, C5, C5AR1, CCBE1, CXCL17, CYP1B1, EIF2AK3, FLT4, GATA4, HIF1A, HPSE, IL1A, IL1B, IL6ST, ISL1, MIA3, NODAL, NOX1, PTGS2, RORA, SULF1, SULF2, TGFB1]	FALSE
GO:0042036	GO_BiologicalProcess-GOA_23.02.2017_10h01	negative regulation of cytokine biosynthetic process	[4, 5, 6, 7, 8]	[Group115, Group126, Group138, Group153, Group159, Group161]	3	10.3448	0.000194737	0.00876317	{Group115=5.1646959803579173E-14, Group126=5.208615599587011E-13, Group138=2.2350029818032858E-20, Group153=9.632572699614655E-25, Group159=2.3614833448420293E-33, Group161=1.2972628010365007E-28}	{Group115=2.995523668607592E-12, Group126=2.2397047078224147E-11, Group138=2.6149534887098442E-18, Group153=1.3196624598472077E-22, Group159=3.6839140179535657E-31, Group161=1.945894201554751E-26}	[IL10, IL6, NFKB1]	[ASB1, BCL3, ELANE, ERRFI1, FOXJ1, FOXP3, GHRL, GHSR, IL10, IL6, INHA, INHBA, INHBB, INPP5D, KLF4, LAG3, LILRB1, MAP2K5, MYO1C, NFKB1, NLRP12, NMI, RNF128, SFTPD, SIGIRR, TIA1, TRIB2, ZFP36, ZFPM1]	FALSE
GO:0055093	GO_BiologicalProcess-GOA_23.02.2017_10h01	response to hyperoxia	[3, 5]	[Group159]	3	10.3448	0.000194737	0.00876317	{Group159=2.3614833448420293E-33}	{Group159=3.6839140179535657E-31}	[CAT, CDK4, PPARG]	[ATG7, ATP6, ATP8, BNIP3, C18200, CAT, CAV1, CDK4, CDKN1A, COL1A1, CRAT, CYP1A1, DNMT3B, EPO, EPX, FAS, FASN, FOXO1, GLYAT, HDAC2, KCNA5, NOX1, PDGFRB, POLB, POLG, POLG2, PPARG, SOD2, TIMP1]	FALSE
GO:1904705	GO_BiologicalProcess-GOA_23.02.2017_10h01	regulation of vascular smooth muscle cell proliferation	[5, 6]	[Group093, Group151, Group159, Group161]	3	10.3448	0.000194737	0.00876317	{Group093=6.491736171405106E-16, Group151=5.6806760749081155E-21, Group159=2.3614833448420293E-33, Group161=1.2972628010365007E-28}	{Group093=4.674050043411676E-14, Group151=6.930424811387901E-19, Group159=3.6839140179535657E-31, Group161=1.945894201554751E-26}	[HMOX1, IL10, TNF]	[AGT, AGXT, BMPR1A, CDKN1B, CNN1, DDX39B, ERN1, GPER1, GSTP1, HMOX1, HPGD, HTR1B, IL10, JAK2, MAP3K5, MDM2, MMP2, MMP9, MYOCD, NQO2, PAK1, PDGFB, PKN1, TERT, TGFB3, TNF, TPM1, XBP1, XBP1P1]	FALSE
GO:0014910	GO_BiologicalProcess-GOA_23.02.2017_10h01	regulation of smooth muscle cell migration	[5, 6, 7, 8]	[Group095]	3	4.54545	0.00219938	0.00879753	{Group095=7.872064311268882E-19}	{Group095=7.793343668156193E-17}	[ACE, BCL2, SERPINE1]	[ACE, ADIPOQ, AGT, AGXT, AIF1, APEX1, ATP7A, BCL2, BMPR1A, BUD31, C1D, CAMK2D, CCL5, CORO1B, CRK, DOCK4, DOCK5, DOCK7, FOXO4, GSTP1, HAS2, HDAC4, IGF1, IGFBP3, IGFBP5, ILK, IQGAP1, ITGA2, LPAR1, LRP1, MDM2, MYC, MYOCD, NDRG4, NELL1, NFE2L2, NOX4, NRP1, P2RY6, PAK1, PDGFA, PDGFB, PDGFD, PDGFRB, PKN1, PLAU, PLXNA1, POSTN, PPARD, PPARGC1A, PVT1, RETN, RPS6KB1, SEMA6D, SERPINE1, SLIT2, SORL1, SRC, SS…	FALSE
GO:0060291	GO_BiologicalProcess-GOA_23.02.2017_10h01	long-term synaptic potentiation	[4, 5, 6, 7, 9, 10]	[Group014, Group057, Group149, Group161]	3	4.54545	0.00219938	0.00879753	{Group014=3.115639175355854E-10, Group057=4.253617063750937E-13, Group149=2.409346134030596E-21, Group161=1.2972628010365007E-28}	{Group014=6.231278350711708E-9, Group057=1.8715915080504124E-11, Group149=2.963495744857633E-19, Group161=1.945894201554751E-26}	[APOE, CREB1, MAPK1]	[APOE, ARC, BRAF, C15906, C16079, C1QTNF1, CALB1, CHRFAM7A, CHRNA7, CREB1, CRH, CRTC1, CX3CR1, DRD1, DRD2, EIF2AK4, FOXM1, GIP, GNAI2, GRIN2A, ITPR3, KALRN, LRRTM1, LRRTM2, MAPK1, MECP2, MPP2, NF1, NLGN1, NLGN3, NOL3, NPTN, NR2E1, NRGN, NTRK2, PAIP2, PLK2, PPP1R9A, PRKCZ, PRNP, PTEN, PTK2B, PTN, RELN, RGS14, S100B, SERPINE2, SHANK2, SHANK3, SLC24A1, SLC24A2, SLC24A4, SLC8A2, SLC8A3, SNAP25, SNAP4…	FALSE
GO:1903524	GO_BiologicalProcess-GOA_23.02.2017_10h01	positive regulation of blood circulation	[3, 4, 5, 6]	[Group060, Group073, Group088, Group158, Group159]	4	5.40541	0.000200833	0.00883666	{Group060=4.473753820840397E-19, Group073=3.0729508041895474E-17, Group088=8.18427208747288E-14, Group158=2.1814444388913482E-30, Group159=2.3614833448420293E-33}	{Group060=4.652703973674013E-17, Group073=2.6427376916030108E-15, Group088=4.337664206360627E-12, Group158=3.3594244358926764E-28, Group159=3.6839140179535657E-31}	[ACE2, EGFR, ICAM1, PTGS2]	[ACE2, ADA, ADM, ADRA1A, ADRA1B, ADRA1D, ADRA2C, ADRB1, AKT1, ATP1A1, ATP1A3, ATP1A4, ATP2A2, AVP, AVPR1A, AVPR1B, AVPR2, C13662, C19897, CASR, CAV1, CD38, CHGA, CTGF, DBH, DHX15, DHX34, DHX8, EDN1, EDN2, EDN3, EGFR, F2R, F2RL1, FGA, FGB, FGG, GCH1, GJA1, GJA5, GSK3A, HEY2, HRC, HRH1, HRH2, HTR2A, ICAM1, IFNAR1, KCNQ1, NKX2-5, NLRP3, NOS1AP, NPPA, OR51E2, OXTR, PDE4D, PTAFR, PTGS2, RGS2, RNF207, …	FALSE
GO:0046627	GO_BiologicalProcess-GOA_23.02.2017_10h01	negative regulation of insulin receptor signaling pathway	[4, 5, 6, 7, 8, 9, 10, 11]	[Group072, Group105, Group144, Group161]	3	10	0.00021577	0.00906233	{Group072=3.6656708819119506E-14, Group105=7.609187719694851E-20, Group144=3.030093432374026E-28, Group161=1.2972628010365007E-28}	{Group072=2.162745820328051E-12, Group105=8.370106491664335E-18, Group144=4.484538279913559E-26, Group161=1.945894201554751E-26}	[IL1B, PRKCB, RELA]	[AHSG, CISH, ENPP1, GPR21, GRB10, GRB14, GSK3A, IL1B, INPP5K, IRS1, KANK1, LMBRD1, MSTN, NCOA5, PID1, PRKCB, PRKCD, PRKCQ, PRKCZ, PTPN1, PTPN2, PTPRE, RELA, RPS6KB1, SOCS1, SOCS2, SOCS3, TRIM72, TSC1, TSC2]	FALSE
GO:0034103	GO_BiologicalProcess-GOA_23.02.2017_10h01	regulation of tissue remodeling	[3, 4]	[Group024, Group056, Group137, Group140, Group156, Group159, Group160, Group161]	4	5.33333	0.000211526	0.00909561	{Group024=1.0110325961232061E-7, Group056=8.114071639618488E-17, Group137=1.0770586316843705E-11, Group140=1.0731331045036508E-17, Group156=2.39789469623427E-30, Group159=2.3614833448420293E-33, Group160=2.095925753462619E-36, Group161=1.2972628010365007E-28}	{Group024=5.05516298061603E-7, Group056=6.734679460883345E-15, Group137=3.231175895053112E-10, Group140=9.872824561433587E-16, Group156=3.668778885238433E-28, Group159=3.6839140179535657E-31, Group160=3.311562690470938E-34, Group161=1.945894201554751E-26}	[BAX, EGFR, IL2, IL6]	[ABR, ADAM8, AGER, AGT, AGXT, ATP6AP1, B4GALT1, BAX, BCR, BGLAP, BTF3P11, CA2, CALCA, CARTPT, CD38, CEACAM1, CLDN18, CSF1R, CSK, CST3, CXXC1, CYP27B1, DCSTAMP, EGFR, ERG, FLT4, FSHB, FSHR, GPNMB, GREM1, HAND2, HRG, IAPP, IL12B, IL15, IL18, IL2, IL20RA, IL21, IL23A, IL6, INPP5D, ITGB3, LEP, LEPR, LEPROT, LRP5, MC4R, MEPE, NF1, NRG1, P2RX7, PDK4, PML, PPARGC1B, PPP3CA, RN7SL263P, S1PR1, SFRP1, SIGL…	FALSE
GO:0001975	GO_BiologicalProcess-GOA_23.02.2017_10h01	response to amphetamine	[5, 6]	[Group012, Group029, Group060, Group095, Group160]	3	9.67742	0.00023822	0.0095288	{Group012=8.013288701897547E-9, Group029=1.537248125048842E-10, Group060=4.473753820840397E-19, Group095=7.872064311268882E-19, Group160=2.095925753462619E-36}	{Group012=9.615946442277057E-8, Group029=3.535670687612336E-9, Group060=4.652703973674013E-17, Group095=7.793343668156193E-17, Group160=3.311562690470938E-34}	[CALM1, ICAM1, SOD1]	[ADORA2A, C00746, C19897, CALM1, CNR2, DBH, DPYSL2, DRD1, DRD2, DRD3, DRD4, DRD5, GPRIN1, GRIN1, GRIN2A, HDAC2, HDAC9, HPRT1, ICAM1, NR4A2, OXT, OXTR, PCDHA6, PDE1B, PPP1R1B, PPP1R9B, PPP3CA, SLC18A2, SOD1, TH, TRDMT1]	FALSE
GO:0032733	GO_BiologicalProcess-GOA_23.02.2017_10h01	positive regulation of interleukin-10 production	[4, 5, 6]	[Group161]	3	9.67742	0.00023822	0.0095288	{Group161=1.2972628010365007E-28}	{Group161=1.945894201554751E-26}	[CD40LG, IL4, IL6]	[BCL3, CD274, CD28, CD34, CD40LG, CD46, CD83, FCER1G, HGF, HMGB1, HSPD1, IL12B, IL20RB, IL23A, IL4, IL6, IRF4, LGALS9, NOD2, PIBF1, PRKCZ, PYCARD, SASH3, SOS1, TIGIT, TLR2, TLR4, TLR9, TNFSF4, TUSC2, XCL1]	FALSE
GO:0001938	GO_BiologicalProcess-GOA_23.02.2017_10h01	positive regulation of endothelial cell proliferation	[5, 6, 7]	[Group042, Group063, Group093, Group098, Group159, Group161]	4	5.12821	0.000246066	0.00959657	{Group042=3.087487453903566E-14, Group063=1.691568844596322E-11, Group093=6.491736171405106E-16, Group098=1.7727505368998016E-13, Group159=2.3614833448420293E-33, Group161=1.2972628010365007E-28}	{Group042=1.8833673468811752E-12, Group063=4.398078995950437E-10, Group093=4.674050043411676E-14, Group098=8.509202577119047E-12, Group159=3.6839140179535657E-31, Group161=1.945894201554751E-26}	[CCL2, CCR3, IL10, PRKCA]	[ACVRL1, AGGF1, AKT1, ANG, ARG1, ARNT, BMP2, BMP4, BMP6, BMPR2, CAV2, CCL11, CCL2, CCL24, CCL26, CCR3, CDH13, CNTN1, CXCL12, CYBA, ECM1, EGFL7, EGR3, F3, FGF13, FGF2, FLT4, GDF2, HIF1A, HMGB2, HTR2B, IL10, ITGB3, JUN, KDR, LRG1, MEN1, MIA3, MTOR, MYDGF, NELL1, NELL2, NF1, NR4A1, NRARP, NRP1, NRP2, PDCD6, PDCL3, PDGFB, PGF, PLXNB3, PPP1R16B, PRKCA, PRKD1, PRKD2, PROX1, RICTOR, RNU1-93P, RPTOR, SCG…	FALSE
GO:0055117	GO_BiologicalProcess-GOA_23.02.2017_10h01	regulation of cardiac muscle contraction	[6, 7, 8]	[Group021, Group071, Group146, Group154]	4	5.12821	0.000246066	0.00959657	{Group021=1.1086437902368568E-10, Group071=2.8660833297684307E-15, Group146=5.380402153400938E-28, Group154=1.203528415039811E-23}	{Group021=2.660745096568456E-9, Group071=1.9202758309448486E-13, Group146=7.909191165499379E-26, Group154=1.6006927920029487E-21}	[ACE2, CALM1, PIK3CG, PRKCA]	[ACE2, ADORA1, ADRA1A, ADRA1B, ADRA1D, AKAP9, ANK2, ASPH, ATP1A1, ATP1A2, ATP1A3, ATP1A4, ATP1B1, ATP2A2, BMP10, CACNA1C, CALM1, CAMK2D, CASQ2, CAV1, CAV3, CHGA, CLIC2, CTGF, CTNNA3, DLG1, DMD, DSC2, DSC3, DSG2, DSP, DSPP, EHD3, FGF13, FKBP1B, FLNA, GATA4, GJA5, GSTM2, GSTO1, HCN4, HDAC4, HRC, JUP, KCNE3, KCNJ2, KCNQ1, NANOS1, NKX2-5, NOS1, NOS1AP, NPPA, P2RX4, PDE4B, PDE4D, PDE5A, PIK3CG, PKP2, …	FALSE
GO:0071479	GO_BiologicalProcess-GOA_23.02.2017_10h01	cellular response to ionizing radiation	[5]	[Group120, Group128, Group160]	4	5.1948	0.000234133	0.00959947	{Group120=1.0480295495135786E-20, Group128=2.43620398361868E-20, Group160=2.095925753462619E-36}	{Group120=1.2471551639211586E-18, Group128=2.825996620997669E-18, Group160=3.311562690470938E-34}	[BCL2L1, GRB2, MAPK14, TP53]	[ANTXR1, ATM, ATR, BCL2L1, BLM, CCND2, CDKN1A, CHEK2, CLOCK, CRYAB, CYBA, DNM2, ECT2, EEF1D, EGR1, ELK1, ERCC4, FBXO4, FIGNL1, GADD45A, GATA3, GRB2, GTF2H5, H2AFX, HAMP, HMGA2, HRAS, HSF1, HUS1, IFI16, INO80, INTS7, KCNH4, KCNH8, KDM1A, KDM4D, MAPK14, MDM2, MGMT, MMAB, NET1, NIPBL, NOX4, NUCKS1, PRPF38B, RAD1, RAD51, RAD51AP1, RAD9A, RAD9B, RHNO1, RHOB, RNASE6, RPL26, RRAD, SERPINA2, SFRP1, SFRP2…	FALSE
GO:0071230	GO_BiologicalProcess-GOA_23.02.2017_10h01	cellular response to amino acid stimulus	[5, 6]	[Group030, Group119, Group129, Group156, Group158, Group161]	3	4.7619	0.00192466	0.0096233	{Group030=6.554902454475491E-13, Group119=1.6445864070363825E-16, Group129=5.489879487929511E-20, Group156=2.39789469623427E-30, Group158=2.1814444388913482E-30, Group161=1.2972628010365007E-28}	{Group030=2.7530590308797062E-11, Group119=1.2827773974883783E-14, Group129=6.0937662316017574E-18, Group156=3.668778885238433E-28, Group158=3.3594244358926764E-28, Group161=1.945894201554751E-26}	[BCL2L1, EGFR, TNF]	[ABCB4, ATP7A, BAIAP2, BCL11A, BCL2L1, CAPN2, CASTOR1, CEBPB, COL16A1, COL1A1, COL1A2, COL3A1, COL4A1, COL4A6, COL5A2, COL6A1, CPEB1, CPEB3, CPEB4, CYBA, CYBB, DNMT1, DNMT3A, EGFR, GCLC, GCLM, GLRA1, GLRA2, HNRNPD, HSF1, IPO5, LAMTOR1, LAMTOR2, LAMTOR3, LAMTOR4, LAMTOR5, LARS, MMP2, MTOR, NEURL1, NSMF, NTRK2, PDGFC, PDGFD, RPTOR, RRAGA, RRAGB, RRAGC, RRAGD, SESN1, SESN2, SESN3, SH3BP4, SIX1, SLC3…	FALSE
GO:0032965	GO_BiologicalProcess-GOA_23.02.2017_10h01	regulation of collagen biosynthetic process	[5, 6, 7]	[Group076, Group081, Group087, Group113, Group143, Group150, Group152, Group153, Group159, Group161]	3	9.375	0.000262129	0.0099609	{Group076=5.586511777497201E-15, Group081=2.3550023519198475E-19, Group087=1.685885468660308E-13, Group113=4.548470078238836E-20, Group143=1.0304610897274216E-26, Group150=6.47380039518465E-25, Group152=3.9478872628846304E-24, Group153=9.632572699614655E-25, Group159=2.3614833448420293E-33, Group161=1.2972628010365007E-28}	{Group076=3.631232655373181E-13, Group081=2.5198525165542367E-17, Group087=8.26083879643551E-12, Group113=5.094286487627496E-18, Group143=1.4735593583102129E-24, Group150=8.998582549306663E-23, Group152=5.329647804894251E-22, Group153=1.3196624598472077E-22, Group159=3.6839140179535657E-31, Group161=1.945894201554751E-26}	[CCL2, IL6, PPARG]	[AMELX, BMP4, CBX8, CCL2, CIITA, CREB3L1, CTGF, CYGB, ENG, ERRFI1, F2, F2R, HDAC2, IL6, IL6R, ITGA2, MYB, PDGFRB, PPARD, PPARG, PRDX5, RAP1A, RGCC, SCX, SERPINB7, SERPINF2, SUCO, TGFB1, TGFB3, UCN, UTS2, WNT4]	FALSE
GO:1900117	GO_BiologicalProcess-GOA_23.02.2017_10h01	regulation of execution phase of apoptosis	[4, 6, 7]	[Group122, Group128, Group137, Group160]	3	9.375	0.000262129	0.0099609	{Group122=1.1159148140695808E-17, Group128=2.43620398361868E-20, Group137=1.0770586316843705E-11, Group160=2.095925753462619E-36}	{Group122=1.0154824808033186E-15, Group128=2.825996620997669E-18, Group137=3.231175895053112E-10, Group160=3.311562690470938E-34}	[BAX, BCL2L1, TP53]	[AIFM1, APAF1, BAX, BCL2L1, BOK, CDKN2A, CEL, CIDEA, CXCR3, DFFA, DLC1, DLEC1, DYNLL1, ENDOG, FAP, FZD3, FZD9, GCG, GLMN, HSF1, PAK2, PKN2, PTGIS, RFFL, RNF34, RPS3, SIRT2, TBX5, TP53, TP53BP1, TP53BP2, ZC3H12A]	FALSE
GO:0045445	GO_BiologicalProcess-GOA_23.02.2017_10h01	myoblast differentiation	[5, 6]	[Group043, Group074, Group106, Group150, Group157, Group161]	4	5	0.000271235	0.0100357	{Group043=7.255481590296722E-10, Group074=6.309205599136187E-19, Group106=3.536637698216287E-14, Group150=6.47380039518465E-25, Group157=6.014358351570216E-37, Group161=1.2972628010365007E-28}	{Group043=1.1608770544474755E-8, Group074=6.435389711118911E-17, Group106=2.1219826189297723E-12, Group150=8.998582549306663E-23, Group157=9.562829778996643E-35, Group161=1.945894201554751E-26}	[CXCL10, MAPK14, RB1, TNF]	[ANKRD2, ASB2, BMP4, BOC, BTG1, CAPN3, CCL17, CCL8, CDON, CMTM5, CSRP3, CXCL10, CXCL14, CXCL9, DDIT3, DDX17, DDX5, DLL1, DTYMK, EPAS1, FGF6, FLOT2, FLT3LG, GDF3, GREM1, HIF1AN, HINFP, HMGCR, ID3, IFRD1, IGF1, IGFBP3, ILK, ISL1, JAG1, KCNAB1, KLHL41, LGALS1, MAML1, MAP3K5, MAPK12, MAPK14, MBNL1, MBNL3, MEF2C, MSTN, MYF5, MYF6, MYOCD, MYOD1, MYOG, NMRK2, NOTCH1, NR2C2, NRG1, PITX1, PLCB1, PPARD, PR…	FALSE
GO:1902624	GO_BiologicalProcess-GOA_23.02.2017_10h01	positive regulation of neutrophil migration	[4, 5, 6, 7, 8, 9, 10, 11]	[Group080, Group157]	3	9.09091	0.000287536	0.0100638	{Group080=2.1232905665321592E-17, Group157=6.014358351570216E-37}	{Group080=1.8684956985483E-15, Group157=9.562829778996643E-35}	[CXCL2, CXCL8, IL1A]	[ADAM8, C1QBP, C3AR1, C5AR1, CAMK1D, CCL19, CCL21, CCR7, CD74, CXCL1, CXCL2, CXCL3, CXCL5, CXCL6, CXCL8, DAPK2, EDN1, EHHADH, IL1A, IL1R1, IL23A, LBP, NCKAP1L, PF4, PF4V1, PPBP, RAC1, RAC2, RNASE1, RPSA, THBS4, TIRAP, XCL1]	FALSE
GO:0016525	GO_BiologicalProcess-GOA_23.02.2017_10h01	negative regulation of angiogenesis	[4, 5, 6, 7, 8, 9, 10, 11, 12]	[Group079, Group094, Group150, Group154, Group157]	4	4.93827	0.000284489	0.0102416	{Group079=8.893212916361293E-15, Group094=1.4395324297023587E-22, Group150=6.47380039518465E-25, Group154=1.203528415039811E-23, Group157=6.014358351570216E-37}	{Group079=5.691656266471228E-13, Group094=1.813810861424972E-20, Group150=8.998582549306663E-23, Group154=1.6006927920029487E-21, Group157=9.562829778996643E-35}	[CCL2, CXCL10, SERPINE1, STAT1]	[ADGRB1, ADGRB2, ADGRB3, AGT, AGXT, AMOT, ANGPT2, ANGPT4, APOH, C13705, CCL2, CCR2, CNMD, COL4A2, COL4A3, CTNNB1, CXCL10, CXCR3, DAB2IP, DCN, DLL4, ECSCR, EPHA2, FAM129B, FASLG, FOXC1, FOXO4, GDF2, GHRL, GPR4, GTF2I, HDAC5, HHEX, HOXA5, HRG, IL17F, ITGB1BP1, KLF4, KLK3, KLKB1, KRIT1, MAP2K5, MEOX2, MMRN2, NF1, NGFR, NOTCH1, NPPB, NPR1, NRG1, PDCD10, PDE3B, PF4, PGK1, PML, PTN, PTPRM, RGCC, RHOA, …	FALSE
GO:0071624	GO_BiologicalProcess-GOA_23.02.2017_10h01	positive regulation of granulocyte chemotaxis	[5, 6, 7, 8, 9, 10, 11]	[Group157]	3	8.82353	0.000314481	0.0106924	{Group157=6.014358351570216E-37}	{Group157=9.562829778996643E-35}	[CXCL2, CXCL8, IL4]	[C1QBP, C3AR1, C5AR1, CAMK1D, CCL19, CCL21, CCR7, CD74, CXCL1, CXCL2, CXCL3, CXCL5, CXCL6, CXCL8, DAPK2, EDN1, EHHADH, IL23A, IL4, LBP, NCKAP1L, PF4, PF4V1, PPBP, RAC1, RAC2, RNASE1, RPSA, S100A11P1, S100A14, S100A7, THBS4, TIRAP, XCL1]	FALSE
GO:0097421	GO_BiologicalProcess-GOA_23.02.2017_10h01	liver regeneration	[5, 6, 7, 8]	[Group031, Group087, Group100, Group145, Group151, Group158, Group159, Group161]	3	8.82353	0.000314481	0.0106924	{Group031=1.01839353956105E-12, Group087=1.685885468660308E-13, Group100=1.4518138688106545E-11, Group145=8.291268333444812E-26, Group151=5.6806760749081155E-21, Group158=2.1814444388913482E-30, Group159=2.3614833448420293E-33, Group161=1.2972628010365007E-28}	{Group031=4.175413512200305E-11, Group087=8.26083879643551E-12, Group100=4.0650788326698327E-10, Group145=1.1607775666822736E-23, Group151=6.930424811387901E-19, Group158=3.3594244358926764E-28, Group159=3.6839140179535657E-31, Group161=1.945894201554751E-26}	[EGFR, HMOX1, IL10]	[AURKA, CCND1, CEBPB, CLDN1, CPB2, CSNK2A2, CSNK2B, EGFR, EZH2, GLI1, HAMP, HFE, HMOX1, IL10, MYC, NFKBIA, PCNA, PNPT1, PRMT5, PTPN3, PVT1, RAP1A, RGN, RPL19, RPL30, RPL32, SRSF1, SRSF5, SULF2, TGFB1, TYMS, UCP2, VTN, WDR35]	FALSE
GO:0043124	GO_BiologicalProcess-GOA_23.02.2017_10h01	negative regulation of I-kappaB kinase/NF-kappaB signaling	[5, 6, 7, 8]	[Group031]	3	4.83871	0.00183812	0.0110287	{Group031=1.01839353956105E-12}	{Group031=4.175413512200305E-11}	[CASP8, IL10, STAT1]	[ABL1, ADIPOQ, ASH1L, BMP7, C1QTNF3, CARD19, CARD8, CASP8, CCDC22, CD27, CYLD, DAB2IP, DNAJA3, ESR1, FAF1, FBXW11, G3BP2, GSTP1, IL10, IL1RL1, LITAF, NAF1, NFKBIA, NFKBID, NLRC3, NLRP12, NLRP3, NLRP6, NLRX1, NOV, NR1H4, OPTN, OTUD7A, OTUD7B, PER1, PLXNA1, PPM1A, PPM1B, PSMD10, PYCARD, PYDC2, RHOH, RIOK3, RIPK1, RORA, RPL10, SIRT1, STAT1, TANK, TLE1, TMSB4X, TNFAIP3, TNFSF14, TNIP1, TNIP3, TRIM59,…	FALSE
GO:0006695	GO_BiologicalProcess-GOA_23.02.2017_10h01	cholesterol biosynthetic process	[6, 7]	[Group108, Group158, Group161]	3	5.08475	0.00159326	0.0111528	{Group108=1.0260577003899081E-11, Group158=2.1814444388913482E-30, Group161=1.2972628010365007E-28}	{Group108=3.283384641247706E-10, Group158=3.3594244358926764E-28, Group161=1.945894201554751E-26}	[APOE, G6PD, SOD1]	[ABCG1, ACAA2, ACAT2, ACLY, APOA1, APOA4, APOA5, APOB, APOE, ARV1, CES1, CFTR, CNBP, CYB5R3, CYP51A1, DHCR24, DHCR7, EBP, ERLIN1, ERLIN2, FDFT1, FDPS, FGF1, G6PD, GGPS1, GLB1, HMGCR, HMGCS1, HMGCS2, HSD17B7, HSD17B7P2, IDI1, IDI2, INSIG1, INSIG2, LBR, LMBR1, LSS, MSMO1, MVD, MVK, NPC1L1, NSDHL, PMVK, POR, PRKAA1, PRKAA2, SC5D, SCAP, SEC14L2, SH2D2A, SH3D19, SOAT2, SOD1, SQLE, SREBF1, TM7SF2, UBL4…	FALSE
GO:0001937	GO_BiologicalProcess-GOA_23.02.2017_10h01	negative regulation of endothelial cell proliferation	[5, 6, 7]	[Group093, Group114, Group149, Group161]	3	8.57143	0.000343003	0.0113191	{Group093=6.491736171405106E-16, Group114=2.1225869765692824E-15, Group149=2.409346134030596E-21, Group161=1.2972628010365007E-28}	{Group093=4.674050043411676E-14, Group114=1.4645850138328048E-13, Group149=2.963495744857633E-19, Group161=1.945894201554751E-26}	[APOE, STAT1, TNF]	[ACVRL1, AIMP1, APOE, APOH, ATOH8, ATP5A1, ATPIF1, CAV1, CAV2, CXCR3, DLL4, ENG, GDF2, GHRL, GJA1, KRIT1, MEN1, NF1, NGFR, NR2F1, NR2F2, PDCD10, PTPRM, RGCC, SCG2, SPARC, STAT1, SULF1, SYNJ2BP, TGFBR1, THBS1, TNF, TNMD, VASH1, XDH]	FALSE
GO:0010039	GO_BiologicalProcess-GOA_23.02.2017_10h01	response to iron ion	[5]	[Group038, Group043, Group104, Group106, Group134, Group160]	3	8.57143	0.000343003	0.0113191	{Group038=7.255481590296722E-10, Group043=7.255481590296722E-10, Group104=5.90642690918055E-14, Group106=3.536637698216287E-14, Group134=5.416335777720201E-14, Group160=2.095925753462619E-36}	{Group038=1.1608770544474755E-8, Group043=1.1608770544474755E-8, Group104=3.2485348000493025E-12, Group106=2.1219826189297723E-12, Group134=3.0331480355233125E-12, Group160=3.311562690470938E-34}	[BCL2, G6PD, HMOX1]	[ABAT, ACO1, ALAD, APBB1, ATP7A, B2M, BCL2, BECN1, BMP6, C1QA, CCNB1, CCND1, CPOX, CYBRD1, CYP1A1, DRD2, F3, FXN, G6PD, HAMP, HFE, HMOX1, MAP1LC3A, MDM2, PDHX, PDX1, SLC11A2, SLC40A1, SLC6A3, SNCA, TF, TFAP2A, TFF1, TFR2, UBL4A]	FALSE
GO:0031102	GO_BiologicalProcess-GOA_23.02.2017_10h01	neuron projection regeneration	[4, 5, 6, 7, 8, 10, 11]	[Group087, Group104, Group121, Group133, Group149, Group160, Group161]	3	5.26316	0.00144205	0.0115364	{Group087=1.685885468660308E-13, Group104=5.90642690918055E-14, Group121=8.591502166967616E-20, Group133=6.575467853059808E-19, Group149=2.409346134030596E-21, Group160=2.095925753462619E-36, Group161=1.2972628010365007E-28}	{Group087=8.26083879643551E-12, Group104=3.2485348000493025E-12, Group121=9.278822340325026E-18, Group133=6.641222531590407E-17, Group149=2.963495744857633E-19, Group160=3.311562690470938E-34, Group161=1.945894201554751E-26}	[APOE, BCL2, IL6]	[ADM, APOA1, APOA4, APOA5, APOD, APOE, BCL2, BRAF, CERS2, CHL1, CNTF, CTNNA1, CXXC1, DAG1, DDX11, DHFR, EPHA4, FKBP1B, FOLR1, HGF, IL6, INPP5F, ISL1, JAK2, JAM3, JUN, KLF4, KLK8, LAMB2, LAMC1, LMNB2, LRIG2, MAP2K1, MAP4K4, MATN2, MTR, NDEL1, NEFL, NTRK3, OCRL, PRRX1, PTEN, PTPRF, PTPRS, RGMA, RTN4R, RTN4RL1, RTN4RL2, SCARF1, SOS1, SPP1, STK24, TNC, TNNC1, TNR, TSPO, ULK1]	FALSE
GO:0070231	GO_BiologicalProcess-GOA_23.02.2017_10h01	T cell apoptotic process	[8]	[Group095, Group122, Group128, Group137, Group160, Group161]	3	5.26316	0.00144205	0.0115364	{Group095=7.872064311268882E-19, Group122=1.1159148140695808E-17, Group128=2.43620398361868E-20, Group137=1.0770586316843705E-11, Group160=2.095925753462619E-36, Group161=1.2972628010365007E-28}	{Group095=7.793343668156193E-17, Group122=1.0154824808033186E-15, Group128=2.825996620997669E-18, Group137=3.231175895053112E-10, Group160=3.311562690470938E-34, Group161=1.945894201554751E-26}	[BAX, ICAM1, TP53]	[ADA, ADAM8, AKT1, BAK1, BAX, BBC3, BCL10, BCL2L11, BMP4, BPNT1, CCL5, CD27, CD274, CLC, CLCF1, DFFA, DNAJA3, DOCK8, EFNA1, FADD, FAS, FASLG, FASN, GIMAP8, GLI3, GPAM, HIF1A, ICAM1, IDO1, IL2RA, JAK3, KDELR1, LGALS13, LGALS14, LGALS16, LGALS17A, LGALS3, LGALS9, NFKBID, PDCD1, PIP, PRELID1, PRKCQ, RAG1, RIPK1, RIPK3, RORC, RPS6, SIVA1, SLC46A2, TGFB2, TP53, TP53BP1, TSC22D3, TSC22D4, WNT5A, ZC3H8]	FALSE
GO:0042311	GO_BiologicalProcess-GOA_23.02.2017_10h01	vasodilation	[8]	[Group088, Group108, Group146, Group158, Group160, Group161]	3	8.33333	0.00037314	0.0119405	{Group088=8.18427208747288E-14, Group108=1.0260577003899081E-11, Group146=5.380402153400938E-28, Group158=2.1814444388913482E-30, Group160=2.095925753462619E-36, Group161=1.2972628010365007E-28}	{Group088=4.337664206360627E-12, Group108=3.283384641247706E-10, Group146=7.909191165499379E-26, Group158=3.3594244358926764E-28, Group160=3.311562690470938E-34, Group161=1.945894201554751E-26}	[APOE, NOS3, SOD1]	[ADORA1, ADORA2A, ADORA2B, ADRB1, ADRB2, ADRB3, AGT, AGTR2, AGXT, APOE, ATG5, BBS2, BDKRB1, BDKRB2, CALCA, CASR, CPS1, CYP21A2, DRD1, EDNRB, GCH1, GPX1, GUCY1A3, ITGA1, KCNJ8, KNG1, MKKS, NANOS1, NANOS3, NOS1, NOS3, PLOD3, PRKG1, RGS2, SOD1, SOD2]	FALSE
GO:0050886	GO_BiologicalProcess-GOA_23.02.2017_10h01	endocrine process	[3]	[Group019, Group039, Group040, Group058, Group073, Group088, Group146]	4	4.49438	0.000407821	0.0122346	{Group019=3.490201866799155E-10, Group039=4.678066514792462E-16, Group040=1.6550600522035983E-11, Group058=1.7223391850378113E-12, Group073=3.0729508041895474E-17, Group088=8.18427208747288E-14, Group146=5.380402153400938E-28}	{Group019=6.28236336023848E-9, Group039=3.5553305512422715E-14, Group040=4.4686621409497153E-10, Group058=6.889356740151245E-11, Group073=2.6427376916030108E-15, Group088=4.337664206360627E-12, Group146=7.909191165499379E-26}	[ACE, ACE2, IL1B, NOS3]	[ACE, ACE2, AGT, AGTR1, AGTR2, AGXT, APLN, ATP6AP2, AVPR1A, AVPR1B, AVPR2, BMP6, C16079, C1QTNF1, C1QTNF3, C9orf3, CGA, CHGA, CMA1, CORIN, CPA3, CPA4, CRH, CRHBP, CRHR1, CRY1, CRY2, CTSG, CTSZ, CYBA, CYP11B2, DRD3, DRD5, ECE1, EDN1, EDN2, EDN3, ENPEP, F2R, F2RL1, FAM129B, FGFR1, FOXL2, FZD4, GAL, GALR1, GATA3, GDF9, GHRL, GJA5, GNAS, HCAR2, HSD11B2, IL1B, INHA, INHBA, INHBB, KCTD11, KISS1, KRAS, …	FALSE
GO:0007435	GO_BiologicalProcess-GOA_23.02.2017_10h01	salivary gland morphogenesis	[5, 6, 7, 8]	[Group056, Group107, Group129, Group140, Group149, Group153, Group155, Group156, Group158, Group159, Group161]	3	7.69231	0.000473619	0.0123141	{Group056=8.114071639618488E-17, Group107=9.28476033582257E-18, Group129=5.489879487929511E-20, Group140=1.0731331045036508E-17, Group149=2.409346134030596E-21, Group153=9.632572699614655E-25, Group155=1.5800558011000385E-30, Group156=2.39789469623427E-30, Group158=2.1814444388913482E-30, Group159=2.3614833448420293E-33, Group161=1.2972628010365007E-28}	{Group056=6.734679460883345E-15, Group107=8.63482711231499E-16, Group129=6.0937662316017574E-18, Group140=9.872824561433587E-16, Group149=2.963495744857633E-19, Group153=1.3196624598472077E-22, Group155=2.4490864917050597E-28, Group156=3.668778885238433E-28, Group158=3.3594244358926764E-28, Group159=3.6839140179535657E-31, Group161=1.945894201554751E-26}	[EGFR, IL6, TNF]	[BMP7, BTBD7, CDC42, DAG1, EDA, EDAR, EGFR, ESRP2, FGF10, FGF7, FGF8, FGFR1, FGFR2, HGF, IL6, LAMA5, MLF2, NELL1, NFIB, NKX3-1, NRP1, NTN4, PAX6, PDGFA, PLXNA1, PLXND1, POLB, POLG2, SEMA3A, SEMA3C, SHH, SNAI2, SOS1, TGFB1, TGFB2, TGFB3, TGM2, TNF, TWSG1]	FALSE
GO:0031343	GO_BiologicalProcess-GOA_23.02.2017_10h01	positive regulation of cell killing	[2, 3, 4]	[Group036, Group084, Group094, Group098, Group103, Group135]	3	7.69231	0.000473619	0.0123141	{Group036=1.0299156926148561E-11, Group084=9.938191658653112E-14, Group094=1.4395324297023587E-22, Group098=1.7727505368998016E-13, Group103=4.578328693136612E-19, Group135=2.6641611867720388E-12}	{Group036=3.192738647106054E-10, Group084=5.068477745913087E-12, Group094=1.813810861424972E-20, Group098=8.509202577119047E-12, Group103=4.7156785539307104E-17, Group135=9.857396391056543E-11}	[CCL2, IFNG, NOS2]	[AP1G1, B2M, BAD, BCL2L11, CADM1, CCL2, CD226, CRTAM, F2RL1, FADD, FCER2, HLA-A, HLA-B, HLA-E, IFNG, IL12A, IL12B, IL12RB1, IL21, IL23A, IL23R, KLRK1, LAG3, LAMP1, NANOS2, NCR3, NECTIN2, NOS2, P2RX7, PVR, RASGRP1, SH2D1A, SLAMF6, STAP1, STAT5B, STX7, UXT, VAV1, XCL1]	FALSE
GO:0046456	GO_BiologicalProcess-GOA_23.02.2017_10h01	icosanoid biosynthetic process	[5, 6, 7, 8]	[Group005]	3	5.35714	0.00136996	0.0123297	{Group005=5.435944221100363E-4}	{Group005=0.0010871888442200725}	[PLA2G4A, PTGS1, PTGS2]	[AIFM2, AKR1C3, ALOX12, ALOX15, ALOX5, ALOX5AP, AMH, ANXA1, AVP, AVPR1A, C13662, CBR1, CD74, EDN1, EDN2, FADS1, FAM213B, FCER1A, GGT1, GGT2, GGT3P, GGT5, GGT6, GGT7, GGTA1P, GGTA2P, GGTLC1, GGTLC2, GGTLC3, HPGDS, IFNAR1, LOC102724197, LTA4H, LTC4S, MGST2, MIF, NLRP3, PIBF1, PLA2G1B, PLA2G4A, PLA2G4F, PLA2G5, PNPLA8, PRG3, PTGDS, PTGES, PTGES2, PTGES3, PTGIS, PTGS1, PTGS2, S100A8, S100A9, SIRT1, S…	FALSE
GO:0070527	GO_BiologicalProcess-GOA_23.02.2017_10h01	platelet aggregation	[5, 6, 7]	[Group071]	3	5.35714	0.00136996	0.0123297	{Group071=2.8660833297684307E-15}	{Group071=1.9202758309448486E-13}	[HSPB1, PIK3CG, PRKCA]	[ABAT, ACTB, ACTG1, ADAMTS18, ALOX12, BLOC1S4, C1QTNF1, CEACAM1, CLIC1, CSRP1, DMTN, FERMT3, FGA, FGB, FGG, FIBP, FLNA, GAS6, GATA1, GNAS, GP1BA, HBB, HSPB1, ILK, ITGA2B, ITGB3, KRT89P, LYN, METAP1, MYH9, MYL12A, MYL9, P2RY12, PDGFRA, PIK3CB, PIK3CG, PLEK, POTEF, PRKCA, PRKCD, PRKCQ, PRKG1, PTPN6, RAP2B, SERPINE2, SLC7A11, STXBP1, STXBP3, SYK, TLN1, TSPAN32, TYRO3, UBASH3B, VCL, VPS33B, WNT3A]	FALSE
GO:0001942	GO_BiologicalProcess-GOA_23.02.2017_10h01	hair follicle development	[3, 5, 6, 7, 8]	[Group027, Group070, Group085, Group100, Group110, Group129, Group139, Group156, Group158, Group161]	4	4.3956	0.000443802	0.0124265	{Group027=2.6415810914468555E-9, Group070=7.878512232929875E-18, Group085=2.6500112563124555E-15, Group100=1.4518138688106545E-11, Group110=1.095475490592073E-21, Group129=5.489879487929511E-20, Group139=2.373309952007317E-19, Group156=2.39789469623427E-30, Group158=2.1814444388913482E-30, Group161=1.2972628010365007E-28}	{Group027=3.698213528025598E-8, Group070=7.405801498954083E-16, Group085=1.8020076542924697E-13, Group100=4.0650788326698327E-10, Group110=1.3583896083341706E-19, Group129=6.0937662316017574E-18, Group139=2.5157085491277562E-17, Group156=3.668778885238433E-28, Group158=3.3594244358926764E-28, Group161=1.945894201554751E-26}	[BCL2, EGFR, RELA, TNF]	[AARS, ACVR1B, ALX4, APCDD1, ATP7A, BCL2, CD109, CDC42, CDH15, CDH3, CELSR1, CTNNB1, CTSV, DKK1, DKK4, DNASE1L2, DSG4, EDA, EDAR, EGFR, ERCC2, FERMT1, FGF10, FGF7, FGFR2, FOXE1, FOXN1, FOXQ1, FST, FUZ, FZD3, FZD6, FZD9, GAL, GNAS, GORAB, HDAC1, HDAC2, HOXC13, HPSE, IGFBP5, INHBA, INTU, KRT17, KRT25, KRT27, KRT71, KRT84, LAMA5, LDB1, LDB2, LGR4, LGR5, LHX2, LRP4, MSX2, MYO5A, MYSM1, NF1, NOM1, NOT…	FALSE
GO:0002286	GO_BiologicalProcess-GOA_23.02.2017_10h01	T cell activation involved in immune response	[3, 4, 5, 6, 7]	[Group077, Group135, Group159, Group161]	4	4.3956	0.000443802	0.0124265	{Group077=1.4816838565081345E-16, Group135=2.6641611867720388E-12, Group159=2.3614833448420293E-33, Group161=1.2972628010365007E-28}	{Group077=1.1705302466414263E-14, Group135=9.857396391056543E-11, Group159=3.6839140179535657E-31, Group161=1.945894201554751E-26}	[ICAM1, IFNG, IL4, IL6]	[ANXA1, APBB1IP, ATP7A, BATF, BCL3, BCL6, CCL19, CD1C, CD46, CD80, CD86, CEACAM1, CLEC4D, CLEC4E, EIF2AK4, EOMES, F2RL1, FCER1G, FOXP1, FOXP3, GATA3, GPR183, HAVCR2, HLA-DMB, HLX, HMGB1, ICAM1, IFNA1, IFNA10, IFNA14, IFNA16, IFNA17, IFNA2, IFNA21, IFNA4, IFNA5, IFNA6, IFNA7, IFNA8, IFNB1, IFNE, IFNG, IFNK, IFNL1, IFNW1, IL12B, IL12RB1, IL18, IL18R1, IL23A, IL23R, IL27, IL4, IL4R, IL6, IRF4, ITGAL…	FALSE
GO:0046632	GO_BiologicalProcess-GOA_23.02.2017_10h01	alpha-beta T cell differentiation	[6, 8, 9, 10, 11]	[Group106, Group133, Group134, Group135, Group160, Group161]	4	4.3956	0.000443802	0.0124265	{Group106=3.536637698216287E-14, Group133=6.575467853059808E-19, Group134=5.416335777720201E-14, Group135=2.6641611867720388E-12, Group160=2.095925753462619E-36, Group161=1.2972628010365007E-28}	{Group106=2.1219826189297723E-12, Group133=6.641222531590407E-17, Group134=3.0331480355233125E-12, Group135=9.857396391056543E-11, Group160=3.311562690470938E-34, Group161=1.945894201554751E-26}	[BCL2, IFNG, IL4, IL6]	[ABL1, ADA, ANXA1, AP3B1, AP3D1, ATP7A, BATF, BCL11B, BCL2, BCL3, BCL6, BMX, BRAF, C00870, CCL19, CD80, CD83, CD86, EOMES, FOXP1, FOXP3, FUT7, GATA3, GLI3, GPR18, GPR183, HLX, HMGB1, IFNG, IHH, IL12B, IL12RB1, IL18, IL18R1, IL23A, IL23R, IL27, IL4, IL4R, IL6, IRF1, IRF4, ITK, ITPKB, JAK3, LEF1, LGALS9, LOXL3, LY9, MYB, MYDGF, NCKAP1L, NKAP, NKX2-3, NLRP3, PAX1, PLA2G2D, PNP, PPY, PRDM1, PRKCZ, PS…	FALSE
GO:0060333	GO_BiologicalProcess-GOA_23.02.2017_10h01	interferon-gamma-mediated signaling pathway	[5, 6, 7]	[Group025, Group032, Group077, Group094, Group135, Group151, Group160, Group161]	4	4.34783	0.000462617	0.0124907	{Group025=1.0149589553391206E-8, Group032=1.0612168011302865E-10, Group077=1.4816838565081345E-16, Group094=1.4395324297023587E-22, Group135=2.6641611867720388E-12, Group151=5.6806760749081155E-21, Group160=2.095925753462619E-36, Group161=1.2972628010365007E-28}	{Group025=1.0149589553391207E-7, Group032=2.6530420028257164E-9, Group077=1.1705302466414263E-14, Group094=1.813810861424972E-20, Group135=9.857396391056543E-11, Group151=6.930424811387901E-19, Group160=3.311562690470938E-34, Group161=1.945894201554751E-26}	[ICAM1, IFNG, PPARG, STAT1]	[B2M, CAMK2A, CAMK2B, CAMK2D, CAMK2G, CD44, CDC37, CIITA, DNAJA3, FCGR1A, FCGR1B, GBP1, GBP2, GNAO1, HCK, HFE, HLA-A, HLA-B, HLA-C, HLA-DPA1, HLA-DPB1, HLA-DQA1, HLA-DQA2, HLA-DQB1, HLA-DQB2, HLA-DRA, HLA-DRB1, HLA-DRB3, HLA-DRB4, HLA-DRB5, HLA-E, HLA-F, HLA-G, HLA-H, HPX, HSP90AB1, ICAM1, IFI30, IFNG, IFNGR1, IFNGR2, IRF1, IRF2, IRF3, IRF4, IRF5, IRF6, IRF7, IRF8, IRF9, JAK1, JAK2, LOC105369230,…	FALSE
GO:0043370	GO_BiologicalProcess-GOA_23.02.2017_10h01	regulation of CD4-positive, alpha-beta T cell differentiation	[8, 9, 10, 11, 12, 13]	[Group135, Group161]	3	8.10811	0.00040493	0.0125528	{Group135=2.6641611867720388E-12, Group161=1.2972628010365007E-28}	{Group135=9.857396391056543E-11, Group161=1.945894201554751E-26}	[IFNG, IL4, IL6]	[ANXA1, BCL6, CCL19, CD80, CD83, CD86, FOXP3, GATA3, HLX, HMGB1, IFNG, IL12B, IL12RB1, IL18, IL23A, IL23R, IL27, IL4, IL4R, IL6, IRF4, JAK3, LGALS9, LOXL3, MYB, MYDGF, NCKAP1L, NLRP3, PRKCZ, RARA, RC3H1, RIPK2, SASH3, SOCS5, TNFSF18, TNFSF4, ZBTB7B]	FALSE
GO:0002720	GO_BiologicalProcess-GOA_23.02.2017_10h01	positive regulation of cytokine production involved in immune response	[4, 5, 6, 7]	[Group086, Group091, Group104, Group143, Group147, Group149, Group157, Group161]	3	7.31707	0.000549363	0.0126353	{Group086=1.2095964201304352E-16, Group091=1.9643660437894692E-20, Group104=5.90642690918055E-14, Group143=1.0304610897274216E-26, Group147=2.219335197191626E-28, Group149=2.409346134030596E-21, Group157=6.014358351570216E-37, Group161=1.2972628010365007E-28}	{Group086=9.676771361043482E-15, Group091=2.3179519316715738E-18, Group104=3.2485348000493025E-12, Group143=1.4735593583102129E-24, Group147=3.306809443815523E-26, Group149=2.963495744857633E-19, Group157=9.562829778996643E-35, Group161=1.945894201554751E-26}	[IL6, MAPK14, MAPK3]	[AMH, B2M, BCL10, CD226, CD36, CD74, F2RL1, FCER1G, FFAR2, FFAR3, FZD5, GATA3, GPRC5B, HLA-A, IL6, KARS, MALT1, MAP3K7, MAPK14, MAPK3, MIF, NLRP3, NOD2, NR4A3, PRKCZ, RNU6-664P, RSAD2, S100A8, S100A9, SASH3, SEMA7A, SPON2, TANK, TLR4, TNFRSF14, TNFSF4, TRAF2, TRAF6, TRIM6, WNT5A, XCL1]	FALSE
GO:0030224	GO_BiologicalProcess-GOA_23.02.2017_10h01	monocyte differentiation	[7, 8, 9, 10]	[Group010, Group025]	3	7.89474	0.00043841	0.0127139	{Group010=1.2309986704583822E-9, Group025=1.0149589553391206E-8}	{Group010=1.8464980056875732E-8, Group025=1.0149589553391207E-7}	[CD4, CSF2, PPARG]	[ACIN1, APCS, BMP4, CD4, CD74, CDK6, CSF1, CSF1R, CSF2, CTNNBIP1, DCSTAMP, FOXP1, GPR68, HLA-DRB1, HOXA7, IFI16, IL31RA, IL34, INPP5D, IRF7, JUN, LOC105369230, MBD4, MED1, MEF2C, MT1G, MYC, MYH9, PDE1B, PDE2A, PIR, PPARG, PVT1, SP3, THOC5, VEGFA, ZBTB46, ZFP36L1]	FALSE
GO:0071870	GO_BiologicalProcess-GOA_23.02.2017_10h01	cellular response to catecholamine stimulus	[5, 6, 7]	[Group018, Group020, Group053, Group078, Group124, Group143, Group149]	3	7.89474	0.00043841	0.0127139	{Group018=5.1128769996314335E-12, Group020=2.552530913936693E-12, Group053=9.576111518151522E-14, Group078=9.848377456993859E-21, Group124=7.279489626776259E-30, Group143=1.0304610897274216E-26, Group149=2.409346134030596E-21}	{Group018=1.7895069498710018E-10, Group020=9.699617472959434E-11, Group053=4.979577989438792E-12, Group078=1.1818052948392632E-18, Group124=1.1064824232699913E-27, Group143=1.4735593583102129E-24, Group149=2.963495744857633E-19}	[MAPK1, MAPK3, PRKCA]	[ABL1, ADCY6, ADIPOQ, APLP1, APP, ATF4, ATP2B4, DNM2, DRD1, DRD5, FAM58A, GABPA, GNAS, GNB1, GNG2, GUCY2C, HCN3, HDAC2, ID1, KCNQ1, LRRK2, MAPK1, MAPK3, NR4A3, PDE4B, PDE4D, PKLR, PRKACA, PRKCA, PRKN, RYR2, SIN3A, SIRT2, SLC9A1, SNCA, SRD5A1, STAR, SULT1A3]	FALSE
GO:0032715	GO_BiologicalProcess-GOA_23.02.2017_10h01	negative regulation of interleukin-6 production	[4, 5, 6]	[Group107, Group115, Group149, Group153, Group156, Group159, Group161]	3	7.5	0.000510591	0.0127648	{Group107=9.28476033582257E-18, Group115=5.1646959803579173E-14, Group149=2.409346134030596E-21, Group153=9.632572699614655E-25, Group156=2.39789469623427E-30, Group159=2.3614833448420293E-33, Group161=1.2972628010365007E-28}	{Group107=8.63482711231499E-16, Group115=2.995523668607592E-12, Group149=2.963495744857633E-19, Group153=1.3196624598472077E-22, Group156=3.668778885238433E-28, Group159=3.6839140179535657E-31, Group161=1.945894201554751E-26}	[IL10, IL6, TNF]	[ARRB1, ARRB2, BANK1, BPI, C1QTNF3, C5AR2, CSK, FOXJ1, FOXP3, GAS6, GBA, GHRL, GHSR, HAVCR2, HGF, IL10, IL36RN, IL6, INPP5D, IRAK3, KLF2, NCKAP1L, NLRC3, NLRP12, NLRX1, NR1H4, ORM1, PTPN22, RABGEF1, SELENOS, SLAMF1, SOCS5, SOS1, SYT11, SYT12, TLR4, TLR9, TNF, TNFAIP3, ZC3H12A]	FALSE
GO:0061028	GO_BiologicalProcess-GOA_23.02.2017_10h01	establishment of endothelial barrier	[6, 7, 8]	[Group105, Group119, Group127, Group161]	3	7.5	0.000510591	0.0127648	{Group105=7.609187719694851E-20, Group119=1.6445864070363825E-16, Group127=9.796760338000124E-17, Group161=1.2972628010365007E-28}	{Group105=8.370106491664335E-18, Group119=1.2827773974883783E-14, Group127=7.9353758737801E-15, Group161=1.945894201554751E-26}	[ICAM1, IL1B, TNF]	[ADD1, AFDN, CDH5, CLDN1, CLDN5, CTNNB1, ENG, EZR, F11R, F2RL1, ICAM1, IKBKB, IL1B, MARVELD2, MSN, MYADM, MYD88, PDE2A, PDE4D, PPP1R16B, PROC, PTPRS, RAP1A, RAP1B, RAP2C, RAPGEF1, RAPGEF2, RAPGEF3, RDX, ROCK1, ROCK2, S1PR2, S1PR3, SOX18, TJP1, TJP2, TNF, TNFRSF1A, WNT7A, WNT7B]	FALSE
GO:1901224	GO_BiologicalProcess-GOA_23.02.2017_10h01	positive regulation of NIK/NF-kappaB signaling	[5, 6, 7, 8]	[Group100, Group119, Group129, Group139, Group155, Group156, Group158, Group161]	3	7.5	0.000510591	0.0127648	{Group100=1.4518138688106545E-11, Group119=1.6445864070363825E-16, Group129=5.489879487929511E-20, Group139=2.373309952007317E-19, Group155=1.5800558011000385E-30, Group156=2.39789469623427E-30, Group158=2.1814444388913482E-30, Group161=1.2972628010365007E-28}	{Group100=4.0650788326698327E-10, Group119=1.2827773974883783E-14, Group129=6.0937662316017574E-18, Group139=2.5157085491277562E-17, Group155=2.4490864917050597E-28, Group156=3.668778885238433E-28, Group158=3.3594244358926764E-28, Group161=1.945894201554751E-26}	[EGFR, RELA, TNF]	[ACTN4, AGO1, AGO3, CALR, CARD10, CARD14, CD14, CHI3L1, COPS8, EGFR, EIF2AK2, HAVCR2, ILK, IRAK1, LIMS1, MALT1, MAP3K7, MAS1, NDUFA2, NOD1, NOD2, PTP4A3, RC3H1, RC3H2, RELA, RPS3, SASH1, TANK, TERF2IP, TIRAP, TLR3, TLR6, TNF, TNFRSF10A, TNFRSF10B, TNFSF15, TRAF2, TRAF4, TRAF6, ZFP91]	FALSE
GO:0050688	GO_BiologicalProcess-GOA_23.02.2017_10h01	regulation of defense response to virus	[4, 5, 6, 7]	[Group054, Group135, Group141, Group148, Group161]	4	4.0404	0.0006106	0.0128226	{Group054=3.353524727928328E-13, Group135=2.6641611867720388E-12, Group141=5.055409846520685E-27, Group148=7.862789791132838E-14, Group161=1.2972628010365007E-28}	{Group054=1.542621374847031E-11, Group135=9.857396391056543E-11, Group141=7.330344277454994E-25, Group148=4.2459064872117324E-12, Group161=1.945894201554751E-26}	[CD4, IFNG, IL1B, IL4]	[AIM2, ANKRD17, AP1B1, AP1G1, AP1M1, AP1M2, AP1S1, AP1S2, AP1S3, AP2A1, AP2A2, AP2B1, AP2M1, AP2S1, APOBEC3F, APOBEC3G, ARF1, ARF1P1, ATP6V1H, B2M, BIRC2, BIRC3, C1QBP, CD247, CD28, CD4, CD8B, CREB3, CREB3L4, DDX58, DDX60, DEAF1, DHX58, DOCK2, EIF2AK2, EIF2AK4, ELMO1, ELMOD2, FYN, HCK, HERC5, HLA-A, HTRA1, IFIT1, IFNG, IFNLR1, IL12B, IL12RB1, IL15, IL1B, IL23A, IL23R, IL27, IL2RA, IL4, ITCH, LCK,…	FALSE
GO:0033280	GO_BiologicalProcess-GOA_23.02.2017_10h01	response to vitamin D	[4, 5, 7]	[Group028, Group081, Group083, Group154]	3	7.14286	0.000589971	0.0129794	{Group028=2.469054413533442E-14, Group081=2.3550023519198475E-19, Group083=9.283507481187041E-23, Group154=1.203528415039811E-23}	{Group028=1.5308137363907342E-12, Group081=2.5198525165542367E-17, Group083=1.1882889575919413E-20, Group154=1.6006927920029487E-21}	[CD4, CXCL10, PTGS2]	[ABCB4, ALPL, AQP3, ATP2B1, BGLAP, BMP7, C16051, CASR, CD4, CDKN2D, CXCL10, CXXC1, CYP24A1, CYP27B1, FGF23, GDAP1, IL15, KANK2, LONP1, MBD4, MED1, PENK, PHEX, PIM1, PTGS2, PTH, PTN, PTRH2, SFRP1, SNAI2, SNW1, SPP1, STC1, STC2, TGFB1, TNC, TNNC1, TPCN2, TRIM24, TRIM25, TYR, VDR]	FALSE
GO:0030193	GO_BiologicalProcess-GOA_23.02.2017_10h01	regulation of blood coagulation	[3, 4, 5, 6, 7]	[Group046, Group063, Group071, Group146, Group154, Group158]	4	4.16667	0.000543594	0.0130463	{Group046=1.7206874458711569E-15, Group063=1.691568844596322E-11, Group071=2.8660833297684307E-15, Group146=5.380402153400938E-28, Group154=1.203528415039811E-23, Group158=2.1814444388913482E-30}	{Group046=1.2044812121098097E-13, Group063=4.398078995950437E-10, Group071=1.9202758309448486E-13, Group146=7.909191165499379E-26, Group154=1.6006927920029487E-21, Group158=3.3594244358926764E-28}	[APOE, NOS3, PRKCA, SERPINE1]	[ABAT, ADAMTS18, ALOX12, ANO6, ANXA2, APOE, APOH, ASIC2, ATXN3, C1QTNF1, C6orf1, CAV1, CD34, CD36, CEACAM1, CEL, CLEC4M, CNTN1, CPB2, DMTN, EDN1, ENPP4, F11, F12, F2, F2R, F2RL1, F3, F7, FAM46A, FAP, FCER1G, FGA, FGB, FGG, FOXA2, GLMN, GP1BA, HPSE, HRG, KLKB1, KNG1, KRT1, LBH, LYN, NANOS3, NFE2L2, NOS3, NR4A3, NRG1, PDGFA, PDGFB, PDGFRA, PGR-AS1, PLAT, PLAU, PLAUR, PLEK, PLG, PRKCA, PRKCD, PRKCQ,…	FALSE
GO:0032649	GO_BiologicalProcess-GOA_23.02.2017_10h01	regulation of interferon-gamma production	[4, 5]	[Group137, Group148, Group161]	4	4.16667	0.000543594	0.0130463	{Group137=1.0770586316843705E-11, Group148=7.862789791132838E-14, Group161=1.2972628010365007E-28}	{Group137=3.231175895053112E-10, Group148=4.2459064872117324E-12, Group161=1.945894201554751E-26}	[IL10, IL1B, IL2, TNF]	[ABL1, AXL, BCL3, C1QBP, CCR2, CCR7, CD14, CD2, CD226, CD244, CD274, CD276, CD3E, CD96, CEBPG, EBI3, FADD, FOXP3, FZD5, GAS6, GATA3, HAVCR2, HLA-A, HLA-DPA1, HLA-DPB1, HLA-DRB1, HMGB1, HRAS, HSPD1, IFNAR1, IFNL1, IL10, IL12A, IL12B, IL12RB1, IL12RB2, IL18, IL18R1, IL1B, IL1RL1, IL2, IL20RB, IL21, IL23A, IL23R, IL27, IL27RA, IL33, IL36RN, INHA, INHBA, IRF8, ISG15, ISL1, KLRK1, LGALS9, LILRB1, LOC1…	FALSE
GO:0032570	GO_BiologicalProcess-GOA_23.02.2017_10h01	response to progesterone	[5, 6]	[Group015, Group041, Group102, Group113, Group159]	3	6.81818	0.000676832	0.0135366	{Group015=4.55560379306427E-8, Group041=1.01839353956105E-12, Group102=5.266614387496279E-16, Group113=4.548470078238836E-20, Group159=2.3614833448420293E-33}	{Group015=2.733362275838562E-7, Group041=4.175413512200305E-11, Group102=3.897294646747246E-14, Group113=5.094286487627496E-18, Group159=3.6839140179535657E-31}	[CCL2, FOS, RELA]	[ABHD2, ACOD1, BAD, C00746, CATSPER1, CATSPER2, CATSPER3, CATSPER4, CATSPERB, CATSPERD, CATSPERG, CAV1, CCL2, CD38, CLDN4, DSG1, DSG2, FOS, FOSB, FOSL1, GABRB1, GJB2, GNPDA1, GPI, NCOA1, NKX2-2, NR1H3, OXT, OXTR, PTGER2, PTN, RAMP2, RELA, SRC, SREBF1, TACR1, TGFB1, TGFB2, TGFB3, THBS1, TLR2, TSPO, TXNIP, TYMS]	FALSE
GO:0045599	GO_BiologicalProcess-GOA_23.02.2017_10h01	negative regulation of fat cell differentiation	[4, 5, 6, 7]	[Group047, Group104, Group107, Group142, Group149, Group153, Group156, Group158, Group161]	3	6.81818	0.000676832	0.0135366	{Group047=3.9053239828330067E-10, Group104=5.90642690918055E-14, Group107=9.28476033582257E-18, Group142=7.17431876360572E-19, Group149=2.409346134030596E-21, Group153=9.632572699614655E-25, Group156=2.39789469623427E-30, Group158=2.1814444388913482E-30, Group161=1.2972628010365007E-28}	{Group047=6.639050770816111E-9, Group104=3.2485348000493025E-12, Group107=8.63482711231499E-16, Group142=7.174318763605721E-17, Group149=2.963495744857633E-19, Group153=1.3196624598472077E-22, Group156=3.668778885238433E-28, Group158=3.3594244358926764E-28, Group161=1.945894201554751E-26}	[IL6, SMAD3, TNF]	[ADIPOQ, ARNTL, ASXL1, AXIN1, BBS12, C1QL4, CCDC85B, DDIT3, E2F1, ENPP1, FAM57B, FOXO1, GATA2, GATA3, GPER1, ID4, IL6, INSIG1, JAG1, JDP2, MMP11, MSX2, RORA, RUNX1T1, SIRT1, SIRT2, SMAD3, SOD2, SORT1, TGFB1, TGFB1I1, TNF, TRIB2, TRIB3, TRPV4, WNT1, WNT10B, WNT3A, WNT5A, WWTR1, ZADH2, ZFP36L2, ZFPM1, ZFPM2]	FALSE
[truncated: 16 more rows]

## Sheet: ClueGO-CC-NodeAttribut
Table S5-2. Node attribute information of GO analysis-cellular component (CC)
GOID	Ontology Source	GOTerm	GOLevels	GOGroups	Nr. Genes	% Associated Genes	Term PValue	Term PValue Corrected with Bonferroni step down	Group PValue	Group PValue Corrected with Bonferroni step down	Associated Genes Found	All Associated Genes	OverViewTerm
[truncated: 2 more rows]

## Sheet: ClueGO-MF-NodeAttribut
Table S5-3. Node attribute information of GO analysis-molecular function (MF)
[truncated: 19 more rows]
