# Supplementary material for: Potential mechanism prediction of Cold-Damp Plague Formula against COVID-19 via network pharmacology analysis and molecular docking
Source: Chin Med. 2020 Jul 30;15:78. doi: 10.1186/s13020-020-00360-8 (PMC7391051; doi:10.1186/s13020-020-00360-8)
Supplement: Supplementary file 7 — Additional file 7: Table S6. Node attribute information of KEGG analysis. [file 13020_2020_360_MOESM7_ESM.xlsx]

## Sheet: ClueGOResults-KEGG Nod
Table S6. Node attribute information of KEGG analysis
GOID	Ontology Source	GOTerm	GOLevels	GOGroups	Nr. Genes	% Associated Genes	Term PValue	Term PValue Corrected with Bonferroni step down	Group PValue	Group PValue Corrected with Bonferroni step down	Associated Genes Found	All Associated Genes	OverViewTerm
KEGG:04010	KEGG_01.03.2017	MAPK signaling pathway	[-1]	[Group24, Group25]	19	7.45098	7.48215e-13	8.15554e-11	{Group24=1.6198446768028198E-23, Group25=6.1255450354991566E-18}	{Group24=3.7256427566464854E-22, Group25=9.80087205679865E-17}	[ATF2, CASP3, EGFR, FOS, GRB2, HSPB1, IL1A, IL1B, MAPK1, MAPK14, MAPK3, MAPK8, NFKB1, PLA2G4A, PRKCA, PRKCB, RELA, TNF, TP53]	[AKT1, AKT2, AKT3, ARRB1, ARRB2, ATF2, ATF4, BDNF, BRAF, CACNA1A, CACNA1B, CACNA1C, CACNA1D, CACNA1E, CACNA1F, CACNA1G, CACNA1H, CACNA1I, CACNA1S, CACNA2D1, CACNA2D2, CACNA2D3, CACNA2D4, CACNB1, CACNB2, CACNB3, CACNB4, CACNG1, CACNG2, CACNG3, CACNG4, CACNG5, CACNG6, CACNG7, CACNG8, CASP3, CD14, CDC25B, CDC42, CHUK, CRK, CRKL, DAXX, DDIT3, DUSP1, DUSP10, DUSP16, DUSP2, DUSP3, DUSP4, DUSP5, DUSP6, …	TRUE
KEGG:04071	KEGG_01.03.2017	Sphingolipid signaling pathway	[-1]	[Group13, Group16, Group19, Group22, Group24, Group25]	15	12.7119	1.1457e-13	1.28318e-11	{Group13=5.9735011611036426E-12, Group16=6.693331547348122E-20, Group19=3.087782314701002E-27, Group22=1.6057462163294384E-19, Group24=1.6198446768028198E-23, Group25=6.1255450354991566E-18}	{Group13=6.570851277214007E-11, Group16=1.4055996249431058E-18, Group19=7.719455786752505E-26, Group22=3.211492432658877E-18, Group24=3.7256427566464854E-22, Group25=9.80087205679865E-17}	[BAX, BCL2, MAPK1, MAPK14, MAPK3, MAPK8, NFKB1, NOS3, PIK3R1, PRKCA, PRKCB, PRKCE, RELA, TNF, TP53]	[ABCC1, ACER1, ACER2, ADORA1, ADORA3, AKT1, AKT2, AKT3, ASAH1, ASAH2, BAX, BCL2, BDKRB2, BID, CERS1, CERS2, CERS3, CERS4, CERS5, CERS6, CTSD, DEGS1, DEGS2, FCER1A, FCER1G, FYN, GAB2, GNA12, GNA13, GNAI1, GNAI2, GNAI3, GNAQ, HRAS, KRAS, MAP2K1, MAP2K2, MAP3K5, MAPK1, MAPK10, MAPK11, MAPK12, MAPK13, MAPK14, MAPK3, MAPK8, MAPK9, MS4A2, NFKB1, NOS3, NRAS, NSMAF, OPRD1, PDPK1, PIK3CA, PIK3CB, PIK3CD, …	TRUE
KEGG:04210	KEGG_01.03.2017	Apoptosis	[-1]	[Group11, Group17, Group22, Group25]	17	12.3188	3.54878e-15	4.22305e-13	{Group11=3.365147532546613E-14, Group17=2.069840670066042E-27, Group22=1.6057462163294384E-19, Group25=6.1255450354991566E-18}	{Group11=4.711206545565258E-13, Group17=5.381585742171709E-26, Group22=3.211492432658877E-18, Group25=9.80087205679865E-17}	[BAX, BCL2, BCL2L1, CASP3, CASP8, CTSB, FOS, MAPK1, MAPK3, MAPK8, MCL1, NFKB1, PARP1, PIK3R1, RELA, TNF, TP53]	[ACTB, ACTG1, AIFM1, AKT1, AKT2, AKT3, APAF1, ATF4, ATM, BAD, BAK1, BAX, BBC3, BCL2, BCL2A1, BCL2L1, BCL2L11, BID, BIRC2, BIRC3, BIRC5, CAPN1, CAPN2, CASP10, CASP12, CASP2, CASP3, CASP6, CASP7, CASP8, CASP9, CFLAR, CHUK, CSF2RB, CTSB, CTSC, CTSD, CTSF, CTSH, CTSK, CTSL, CTSO, CTSS, CTSV, CTSW, CTSZ, CYCS, DAB2IP, DAXX, DDIT3, DFFA, DFFB, DIABLO, EIF2AK3, EIF2S1, ENDOG, ERN1, FADD, FAS, FASLG, FOS…	TRUE
KEGG:04211	KEGG_01.03.2017	Longevity regulating pathway	[-1]	[Group07, Group09, Group15, Group25]	9	9.89011	1.30079e-07	8.97548e-06	{Group07=1.875631249072848E-15, Group09=1.0862374578391279E-20, Group15=2.0979889133002987E-10, Group25=6.1255450354991566E-18}	{Group07=2.813446873609272E-14, Group09=2.3897224072460815E-19, Group15=2.097988913300299E-9, Group25=9.80087205679865E-17}	[ATF2, BAX, CAT, CREB1, NFKB1, PIK3R1, PPARG, RELA, TP53]	[ADCY1, ADCY2, ADCY3, ADCY4, ADCY5, ADCY6, ADCY7, ADCY8, ADCY9, ADIPOQ, ADIPOR1, ADIPOR2, AKT1, AKT1S1, AKT2, AKT3, APPL1, ATF2, ATF4, ATF6B, ATG101, ATG13, ATG5, BAX, CAMK4, CAMKK2, CAT, CREB1, CREB3, CREB3L1, CREB3L2, CREB3L3, CREB3L4, CREB5, EHMT1, EHMT2, EIF4E, EIF4E1B, EIF4E2, EIF4EBP1, FOXO1, FOXO3, HRAS, IGF1, IGF1R, INS, INSR, IRS1, IRS2, IRS4, KL, KRAS, MTOR, NFKB1, NRAS, PIK3CA, PIK3CB,…	TRUE
KEGG:04213	KEGG_01.03.2017	Longevity regulating pathway	[-1]	[Group01]	3	4.83871	0.0197552	0.0395104	{Group01=0.0197552179243188}	{Group01=0.0197552179243188}	[CAT, PIK3R1, SOD1]	[ADCY1, ADCY2, ADCY3, ADCY4, ADCY5, ADCY6, ADCY7, ADCY8, ADCY9, AKT1, AKT1S1, AKT2, AKT3, ATG5, CAT, CLPB, CRYAB, EIF4EBP2, FOXA2, FOXO1, FOXO3, HDAC1, HDAC2, HRAS, HSPA1A, HSPA1B, HSPA1L, HSPA2, HSPA6, HSPA8, IGF1, IGF1R, INS, INSR, IRS1, IRS2, IRS4, KRAS, MTOR, NRAS, PIK3CA, PIK3CB, PIK3CD, PIK3R1, PIK3R2, PIK3R3, PRKAA1, PRKAA2, PRKAB1, PRKAB2, PRKACA, PRKACB, PRKACG, PRKAG1, PRKAG2, PRKAG3, R…	TRUE
KEGG:04380	KEGG_01.03.2017	Osteoclast differentiation	[-1]	[Group16, Group21, Group24, Group25]	16	12.3077	2.61477e-14	2.95469e-12	{Group16=6.693331547348122E-20, Group21=3.0946781157773867E-27, Group24=1.6198446768028198E-23, Group25=6.1255450354991566E-18}	{Group16=1.4055996249431058E-18, Group21=7.427227477865728E-26, Group24=3.7256427566464854E-22, Group25=9.80087205679865E-17}	[CREB1, FOS, GRB2, IFNG, IL1A, IL1B, MAPK1, MAPK14, MAPK3, MAPK8, NFKB1, PIK3R1, PPARG, RELA, STAT1, TNF]	[ACP5, AKT1, AKT2, AKT3, BLNK, BTK, CALCR, CAMK4, CHUK, CREB1, CSF1, CSF1R, CTSK, CYBA, CYBB, CYLD, FCGR1A, FCGR2A, FCGR2B, FCGR2C, FCGR3A, FCGR3B, FHL2, FOS, FOSB, FOSL1, FOSL2, FYN, GAB2, GRB2, IFNAR1, IFNAR2, IFNB1, IFNG, IFNGR1, IFNGR2, IKBKB, IKBKG, IL1A, IL1B, IL1R1, IRF9, ITGB3, JAK1, JUN, JUNB, JUND, LCK, LCP2, LILRA1, LILRA2, LILRA3, LILRA4, LILRA5, LILRA6, LILRB1, LILRB2, LILRB3, LILRB4…	TRUE
KEGG:04612	KEGG_01.03.2017	Antigen processing and presentation	[-1]	[Group03]	5	6.49351	0.000709227	0.0127661	{Group03=2.986200378665797E-4}	{Group03=0.0011944801514663188}	[CD4, CREB1, CTSB, IFNG, TNF]	[B2M, CALR, CANX, CD4, CD74, CD8A, CD8B, CIITA, CREB1, CTSB, CTSL, CTSS, HLA-A, HLA-B, HLA-C, HLA-DMA, HLA-DMB, HLA-DOA, HLA-DOB, HLA-DPA1, HLA-DPB1, HLA-DQA1, HLA-DQA2, HLA-DQB1, HLA-DRA, HLA-DRB1, HLA-DRB3, HLA-DRB4, HLA-DRB5, HLA-E, HLA-F, HLA-G, HSP90AA1, HSP90AB1, HSPA1A, HSPA1B, HSPA1L, HSPA2, HSPA4, HSPA5, HSPA6, HSPA8, IFI30, IFNG, KIR2DL1, KIR2DL2, KIR2DL3, KIR2DL4, KIR2DL5A, KIR2DS1, KI…	TRUE
KEGG:04614	KEGG_01.03.2017	Renin-angiotensin system	[-1]	[Group02]	3	13.0435	0.00119684	0.0179527	{Group02=0.0011968439639149855}	{Group02=0.0035905318917449566}	[ACE, ACE2, ANPEP]	[ACE, ACE2, AGT, AGTR1, AGTR2, ANPEP, ATP6AP2, CMA1, CPA3, CTSA, CTSG, ENPEP, KLK1, KLK2, LNPEP, MAS1, MME, MRGPRD, NLN, PRCP, PREP, REN, THOP1]	TRUE
KEGG:04650	KEGG_01.03.2017	Natural killer cell mediated cytotoxicity	[-1]	[Group14, Group18, Group25]	11	8.27068	3.03152e-08	2.27364e-06	{Group14=3.803797610461494E-18, Group18=1.7234766993344764E-7, Group25=6.1255450354991566E-18}	{Group14=6.46645593778454E-17, Group18=1.0340860196006859E-6, Group25=9.80087205679865E-17}	[CASP3, CSF2, GRB2, ICAM1, IFNG, MAPK1, MAPK3, PIK3R1, PRKCA, PRKCB, TNF]	[ARAF, BID, BRAF, CASP3, CD244, CD247, CD48, CSF2, FAS, FASLG, FCER1G, FCGR3A, FCGR3B, FYN, GRB2, GZMB, HCST, HLA-A, HLA-B, HLA-C, HLA-E, HLA-G, HRAS, ICAM1, ICAM2, IFNA1, IFNA10, IFNA13, IFNA14, IFNA16, IFNA17, IFNA2, IFNA21, IFNA4, IFNA5, IFNA6, IFNA7, IFNA8, IFNAR1, IFNAR2, IFNB1, IFNG, IFNGR1, IFNGR2, ITGAL, ITGB2, KIR2DL1, KIR2DL2, KIR2DL3, KIR2DL4, KIR2DL5A, KIR2DS1, KIR2DS2, KIR2DS3, KIR2D…	TRUE
KEGG:04664	KEGG_01.03.2017	Fc epsilon RI signaling pathway	[-1]	[Group21, Group23, Group24, Group25]	11	16.1765	1.9695e-11	2.00889e-09	{Group21=3.0946781157773867E-27, Group23=3.9857914471622045E-9, Group24=1.6198446768028198E-23, Group25=6.1255450354991566E-18}	{Group21=7.427227477865728E-26, Group23=3.1886331577297636E-8, Group24=3.7256427566464854E-22, Group25=9.80087205679865E-17}	[CSF2, GRB2, IL4, MAPK1, MAPK14, MAPK3, MAPK8, PIK3R1, PLA2G4A, PRKCA, TNF]	[AKT1, AKT2, AKT3, ALOX5, ALOX5AP, BTK, CSF2, FCER1A, FCER1G, FYN, GAB2, GRB2, HRAS, IL13, IL3, IL4, IL5, INPP5D, JMJD7-PLA2G4B, KRAS, LAT, LCP2, LOC102723407, LYN, MAP2K1, MAP2K2, MAP2K3, MAP2K4, MAP2K6, MAP2K7, MAPK1, MAPK10, MAPK11, MAPK12, MAPK13, MAPK14, MAPK3, MAPK8, MAPK9, MS4A2, NRAS, PDPK1, PIK3CA, PIK3CB, PIK3CD, PIK3R1, PIK3R2, PIK3R3, PLA2G4A, PLA2G4B, PLA2G4C, PLA2G4D, PLA2G4E, PLA2G…	TRUE
KEGG:04668	KEGG_01.03.2017	TNF signaling pathway	[-1]	[Group25]	21	19.4444	4.94778e-23	6.43212e-21	{Group25=6.1255450354991566E-18}	{Group25=9.80087205679865E-17}	[ATF2, CASP3, CASP8, CCL2, CREB1, CSF2, CXCL10, CXCL2, FOS, ICAM1, IL1B, IL6, MAPK1, MAPK14, MAPK3, MAPK8, NFKB1, PIK3R1, PTGS2, RELA, TNF]	[AKT1, AKT2, AKT3, ATF2, ATF4, ATF6B, BAG4, BCL3, BIRC2, BIRC3, CASP10, CASP3, CASP7, CASP8, CCL2, CCL20, CCL5, CEBPB, CFLAR, CHUK, CREB1, CREB3, CREB3L1, CREB3L2, CREB3L3, CREB3L4, CREB5, CSF1, CSF2, CX3CL1, CXCL1, CXCL10, CXCL2, CXCL3, CXCL5, DAB2IP, DNM1L, EDN1, FADD, FAS, FOS, ICAM1, IKBKB, IKBKG, IL15, IL18R1, IL1B, IL6, ITCH, JAG1, JUN, JUNB, LIF, LTA, MAP2K1, MAP2K3, MAP2K4, MAP2K6, MAP2K7…	TRUE
KEGG:04726	KEGG_01.03.2017	Serotonergic synapse	[-1]	[Group04, Group23, Group25]	8	7.07965	8.71707e-06	0.000435853	{Group04=8.768999845808076E-5, Group23=3.9857914471622045E-9, Group25=6.1255450354991566E-18}	{Group04=4.384499922904038E-4, Group23=3.1886331577297636E-8, Group25=9.80087205679865E-17}	[CASP3, MAPK1, MAPK3, PLA2G4A, PRKCA, PRKCB, PTGS1, PTGS2]	[ADCY5, ALOX12, ALOX12B, ALOX15, ALOX15B, ALOX5, APP, ARAF, BRAF, CACNA1A, CACNA1B, CACNA1C, CACNA1D, CACNA1F, CACNA1S, CASP3, CYP2C18, CYP2C19, CYP2C8, CYP2C9, CYP2D6, CYP2J2, CYP4X1, DDC, DUSP1, GABRB1, GABRB2, GABRB3, GNAI1, GNAI2, GNAI3, GNAO1, GNAQ, GNAS, GNB1, GNB2, GNB3, GNB4, GNB5, GNG10, GNG11, GNG12, GNG13, GNG2, GNG3, GNG4, GNG5, GNG7, GNG8, GNGT1, GNGT2, HRAS, HTR1A, HTR1B, HTR1D, HTR…	TRUE
KEGG:04915	KEGG_01.03.2017	Estrogen signaling pathway	[-1]	[Group20, Group25]	10	10.2041	1.80332e-08	1.42462e-06	{Group20=3.4212824879811116E-9, Group25=6.1255450354991566E-18}	{Group20=3.0791542391830005E-8, Group25=9.80087205679865E-17}	[ATF2, CALM1, CREB1, EGFR, FOS, GRB2, MAPK1, MAPK3, NOS3, PIK3R1]	[ADCY1, ADCY2, ADCY3, ADCY4, ADCY5, ADCY6, ADCY7, ADCY8, ADCY9, AKT1, AKT2, AKT3, ATF2, ATF4, ATF6B, CALM1, CALM2, CALM3, CALML3, CALML4, CALML5, CALML6, CREB1, CREB3, CREB3L1, CREB3L2, CREB3L3, CREB3L4, CREB5, EGFR, ESR1, ESR2, FKBP4, FKBP5, FOS, GABBR1, GABBR2, GNAI1, GNAI2, GNAI3, GNAO1, GNAQ, GNAS, GPER1, GRB2, GRM1, HBEGF, HRAS, HSP90AA1, HSP90AB1, HSP90B1, HSPA1A, HSPA1B, HSPA1L, HSPA2, HSP…	TRUE
KEGG:04921	KEGG_01.03.2017	Oxytocin signaling pathway	[-1]	[Group08, Group20, Group23, Group25]	11	7.18954	1.29625e-07	9.07376e-06	{Group08=1.0989376730868003E-7, Group20=3.4212824879811116E-9, Group23=3.9857914471622045E-9, Group25=6.1255450354991566E-18}	{Group08=7.692563711607602E-7, Group20=3.0791542391830005E-8, Group23=3.1886331577297636E-8, Group25=9.80087205679865E-17}	[CALM1, EGFR, FOS, MAPK1, MAPK3, NOS3, PIK3CG, PLA2G4A, PRKCA, PRKCB, PTGS2]	[ACTB, ACTG1, ADCY1, ADCY2, ADCY3, ADCY4, ADCY5, ADCY6, ADCY7, ADCY8, ADCY9, CACNA1C, CACNA1D, CACNA1F, CACNA1S, CACNA2D1, CACNA2D2, CACNA2D3, CACNA2D4, CACNB1, CACNB2, CACNB3, CACNB4, CACNG1, CACNG2, CACNG3, CACNG4, CACNG5, CACNG6, CACNG7, CACNG8, CALM1, CALM2, CALM3, CALML3, CALML4, CALML5, CALML6, CAMK1, CAMK1D, CAMK1G, CAMK2A, CAMK2B, CAMK2D, CAMK2G, CAMK4, CAMKK2, CCND1, CD38, CDKN1A, EEF2, …	TRUE
KEGG:04933	KEGG_01.03.2017	AGE-RAGE signaling pathway in diabetic complications	[-1]	[Group19, Group25]	25	25.2525	1.21775e-30	1.6196e-28	{Group19=3.087782314701002E-27, Group25=6.1255450354991566E-18}	{Group19=7.719455786752505E-26, Group25=9.80087205679865E-17}	[BAX, BCL2, CASP3, CCL2, CDK4, CXCL8, ICAM1, IL1A, IL1B, IL6, MAPK1, MAPK14, MAPK3, MAPK8, NFKB1, NOS3, PIK3R1, PRKCA, PRKCB, PRKCE, RELA, SERPINE1, SMAD3, STAT1, TNF]	[AGER, AGTR1, AKT1, AKT2, AKT3, BAX, BCL2, CASP3, CCL2, CCND1, CDC42, CDK4, CDKN1B, COL1A1, COL1A2, COL3A1, COL4A1, COL4A2, COL4A3, COL4A4, COL4A5, COL4A6, CXCL8, CYBB, DIAPH1, EDN1, EGR1, F3, FN1, FOXO1, HRAS, ICAM1, IL1A, IL1B, IL6, JAK2, JUN, KRAS, MAPK1, MAPK10, MAPK11, MAPK12, MAPK13, MAPK14, MAPK3, MAPK8, MAPK9, MMP2, NFATC1, NFKB1, NOS3, NOX1, NOX3, NRAS, PIK3CA, PIK3CB, PIK3CD, PIK3R1, PI…	TRUE
KEGG:05133	KEGG_01.03.2017	Pertussis	[-1]	[Group06, Group14, Group17, Group19, Group24, Group25]	16	21.0526	3.3594e-18	4.26644e-16	{Group06=2.637389460959518E-13, Group14=3.803797610461494E-18, Group17=2.069840670066042E-27, Group19=3.087782314701002E-27, Group24=1.6198446768028198E-23, Group25=6.1255450354991566E-18}	{Group06=3.4286062992473736E-12, Group14=6.46645593778454E-17, Group17=5.381585742171709E-26, Group19=7.719455786752505E-26, Group24=3.7256427566464854E-22, Group25=9.80087205679865E-17}	[CALM1, CASP3, CXCL8, FOS, IL10, IL1A, IL1B, IL6, MAPK1, MAPK14, MAPK3, MAPK8, NFKB1, NOS2, RELA, TNF]	[C1QA, C1QB, C1QC, C1R, C1S, C2, C3, C4A, C4B, C4BPA, C4BPB, C5, CALM1, CALM2, CALM3, CALML3, CALML4, CALML5, CALML6, CASP1, CASP3, CASP7, CD14, CFL1, CFL2, CXCL5, CXCL6, CXCL8, FOS, GNAI1, GNAI2, GNAI3, IL10, IL12A, IL12B, IL1A, IL1B, IL23A, IL6, IRAK1, IRAK4, IRF1, IRF3, IRF8, ITGA5, ITGAM, ITGB1, ITGB2, JUN, LY96, MAPK1, MAPK10, MAPK11, MAPK12, MAPK13, MAPK14, MAPK3, MAPK8, MAPK9, MYD88, NFKB1…	TRUE
KEGG:05140	KEGG_01.03.2017	Leishmaniasis	[-1]	[Group17, Group21, Group24, Group25]	16	21.9178	1.66872e-18	2.13596e-16	{Group17=2.069840670066042E-27, Group21=3.0946781157773867E-27, Group24=1.6198446768028198E-23, Group25=6.1255450354991566E-18}	{Group17=5.381585742171709E-26, Group21=7.427227477865728E-26, Group24=3.7256427566464854E-22, Group25=9.80087205679865E-17}	[FOS, IFNG, IL10, IL1A, IL1B, IL4, MAPK1, MAPK14, MAPK3, NFKB1, NOS2, PRKCB, PTGS2, RELA, STAT1, TNF]	[C3, CR1, CYBA, ELK1, FCGR1A, FCGR2A, FCGR2C, FCGR3A, FCGR3B, FOS, HLA-DMA, HLA-DMB, HLA-DOA, HLA-DOB, HLA-DPA1, HLA-DPB1, HLA-DQA1, HLA-DQA2, HLA-DQB1, HLA-DRA, HLA-DRB1, HLA-DRB3, HLA-DRB4, HLA-DRB5, IFNG, IFNGR1, IFNGR2, IL10, IL12A, IL12B, IL1A, IL1B, IL4, IRAK1, IRAK4, ITGA4, ITGAM, ITGB1, ITGB2, JAK1, JAK2, JUN, LOC102723407, MAP3K7, MAPK1, MAPK11, MAPK12, MAPK13, MAPK14, MAPK3, MARCKSL1, M…	TRUE
KEGG:05142	KEGG_01.03.2017	Chagas disease (American trypanosomiasis)	[-1]	[Group17, Group19, Group21, Group25]	21	20.5882	1.35521e-23	1.77533e-21	{Group17=2.069840670066042E-27, Group19=3.087782314701002E-27, Group21=3.0946781157773867E-27, Group25=6.1255450354991566E-18}	{Group17=5.381585742171709E-26, Group19=7.719455786752505E-26, Group21=7.427227477865728E-26, Group25=9.80087205679865E-17}	[ACE, CASP8, CCL2, CXCL8, FOS, IFNG, IL10, IL1B, IL2, IL6, MAPK1, MAPK14, MAPK3, MAPK8, NFKB1, NOS2, PIK3R1, RELA, SERPINE1, SMAD3, TNF]	[ACE, ADCY1, AKT1, AKT2, AKT3, BDKRB2, C1QA, C1QB, C1QC, C3, CALR, CASP8, CCL2, CCL3, CCL3L1, CCL3L3, CCL5, CD247, CD3D, CD3E, CD3G, CFLAR, CHUK, CXCL8, FADD, FAS, FASLG, FOS, GNA11, GNA14, GNA15, GNAI1, GNAI2, GNAI3, GNAL, GNAO1, GNAQ, GNAS, IFNB1, IFNG, IFNGR1, IFNGR2, IKBKB, IKBKG, IL10, IL12A, IL12B, IL1B, IL2, IL6, IRAK1, IRAK4, JUN, MAP2K4, MAPK1, MAPK10, MAPK11, MAPK12, MAPK13, MAPK14, MAP…	TRUE
KEGG:05145	KEGG_01.03.2017	Toxoplasmosis	[-1]	[Group17, Group22, Group25]	17	15.0442	1.10408e-16	1.35801e-14	{Group17=2.069840670066042E-27, Group22=1.6057462163294384E-19, Group25=6.1255450354991566E-18}	{Group17=5.381585742171709E-26, Group22=3.211492432658877E-18, Group25=9.80087205679865E-17}	[BCL2, BCL2L1, CASP3, CASP8, CD40LG, IFNG, IL10, MAPK1, MAPK14, MAPK3, MAPK8, NFKB1, NOS2, PIK3CG, RELA, STAT1, TNF]	[AKT1, AKT2, AKT3, ALOX5, BAD, BCL2, BCL2L1, BIRC2, BIRC3, BIRC7, BIRC8, CASP3, CASP8, CASP9, CCR5, CD40, CD40LG, CHUK, CIITA, CYCS, GNAI1, GNAI2, GNAI3, GNAO1, HLA-DMA, HLA-DMB, HLA-DOA, HLA-DOB, HLA-DPA1, HLA-DPB1, HLA-DQA1, HLA-DQA2, HLA-DQB1, HLA-DRA, HLA-DRB1, HLA-DRB3, HLA-DRB4, HLA-DRB5, HSPA1A, HSPA1B, HSPA1L, HSPA2, HSPA6, HSPA8, IFNG, IFNGR1, IFNGR2, IKBKB, IKBKG, IL10, IL10RA, IL10RB, …	TRUE
KEGG:05161	KEGG_01.03.2017	Hepatitis B	[-1]	[Group09, Group19, Group22, Group24, Group25]	24	16.6667	1.13041e-24	1.49215e-22	{Group09=1.0862374578391279E-20, Group19=3.087782314701002E-27, Group22=1.6057462163294384E-19, Group24=1.6198446768028198E-23, Group25=6.1255450354991566E-18}	{Group09=2.3897224072460815E-19, Group19=7.719455786752505E-26, Group22=3.211492432658877E-18, Group24=3.7256427566464854E-22, Group25=9.80087205679865E-17}	[ATF2, BAX, BCL2, CASP3, CASP8, CDK4, CREB1, CXCL8, FOS, GRB2, IL6, MAPK1, MAPK3, MAPK8, NFKB1, PIK3R1, PRKCA, PRKCB, RB1, RELA, SMAD3, STAT1, TNF, TP53]	[AKT1, AKT2, AKT3, APAF1, ATF2, ATF4, ATF6B, ATP6AP1, BAD, BAX, BCL2, BIRC5, CASP10, CASP12, CASP3, CASP8, CASP9, CCNA1, CCNA2, CCND1, CCNE1, CCNE2, CDK2, CDK4, CDK6, CDKN1A, CDKN1B, CHUK, CREB1, CREB3, CREB3L1, CREB3L2, CREB3L3, CREB3L4, CREB5, CREBBP, CXCL8, CYCS, DDB1, DDB2, DDX3X, DDX58, E2F1, E2F2, E2F3, EGR2, EGR3, ELK1, EP300, FADD, FAS, FASLG, FOS, GRB2, HRAS, HSPG2, IFIH1, IFNA1, IFNA10,…	TRUE
KEGG:05164	KEGG_01.03.2017	Influenza A	[-1]	[Group14, Group16, Group19, Group24, Group25]	20	11.5607	3.02337e-17	3.77921e-15	{Group14=3.803797610461494E-18, Group16=6.693331547348122E-20, Group19=3.087782314701002E-27, Group24=1.6198446768028198E-23, Group25=6.1255450354991566E-18}	{Group14=6.46645593778454E-17, Group16=1.4055996249431058E-18, Group19=7.719455786752505E-26, Group24=3.7256427566464854E-22, Group25=9.80087205679865E-17}	[ATF2, CCL2, CXCL10, CXCL8, ICAM1, IFNG, IL1A, IL1B, IL6, MAPK1, MAPK14, MAPK3, MAPK8, NFKB1, PIK3R1, PRKCA, PRKCB, RELA, STAT1, TNF]	[ACTB, ACTG1, ADAR, AGFG1, AKT1, AKT2, AKT3, ATF2, BCL2L2-PABPN1, CASP1, CASP9, CCL2, CCL5, CIITA, CPSF4, CREBBP, CXCL10, CXCL8, CYCS, DDX39B, DDX58, DNAJB1, DNAJC3, EIF2AK1, EIF2AK2, EIF2AK3, EIF2AK4, EIF2S1, EP300, FAS, FASLG, FDPS, FURIN, GSK3B, HLA-DMA, HLA-DMB, HLA-DOA, HLA-DOB, HLA-DPA1, HLA-DPB1, HLA-DQA1, HLA-DQA2, HLA-DQB1, HLA-DRA, HLA-DRB1, HLA-DRB3, HLA-DRB4, HLA-DRB5, HNRNPUL1, HSPA1…	TRUE
KEGG:05166	KEGG_01.03.2017	HTLV-I infection	[-1]	[Group07, Group09, Group25]	18	7.03125	9.07669e-12	9.71206e-10	{Group07=1.875631249072848E-15, Group09=1.0862374578391279E-20, Group25=6.1255450354991566E-18}	{Group07=2.813446873609272E-14, Group09=2.3897224072460815E-19, Group25=9.80087205679865E-17}	[ATF2, BAX, BCL2L1, CDK4, CREB1, CSF2, FOS, ICAM1, IL2, IL6, MAPK8, NFKB1, PIK3R1, RB1, RELA, SMAD3, TNF, TP53]	[ADCY1, ADCY2, ADCY3, ADCY4, ADCY5, ADCY6, ADCY7, ADCY8, ADCY9, AKT1, AKT2, AKT3, ANAPC1, ANAPC10, ANAPC11, ANAPC2, ANAPC4, ANAPC5, ANAPC7, APC, APC2, ATF1, ATF2, ATF3, ATF4, ATM, ATR, BAX, BCL2L1, BUB1B, BUB3, CALR, CANX, CCNB2, CCND1, CCND2, CCND3, CD3D, CD3E, CD3G, CD40, CDC16, CDC20, CDC23, CDC26, CDC27, CDK4, CDKN1A, CDKN2A, CDKN2B, CDKN2C, CHEK1, CHEK2, CHUK, CREB1, CREBBP, CREM, CRTC1, CRT…	TRUE
KEGG:05200	KEGG_01.03.2017	Pathways in cancer	[-1]	[Group10, Group22, Group25]	26	6.58228	2.57128e-16	3.13696e-14	{Group10=2.338707280735993E-19, Group22=1.6057462163294384E-19, Group25=6.1255450354991566E-18}	{Group10=4.4435438333983866E-18, Group22=3.211492432658877E-18, Group25=9.80087205679865E-17}	[BAX, BCL2, BCL2L1, CASP3, CASP8, CDK4, CXCL8, EGFR, FOS, GRB2, IL6, MAPK1, MAPK3, MAPK8, NFKB1, NOS2, PIK3R1, PPARG, PRKCA, PRKCB, PTGS2, RB1, RELA, SMAD3, STAT1, TP53]	[ABL1, ADCY1, ADCY2, ADCY3, ADCY4, ADCY5, ADCY6, ADCY7, ADCY8, ADCY9, AGTR1, AKT1, AKT2, AKT3, APC, APC2, APPL1, AR, ARAF, ARHGEF1, ARHGEF11, ARHGEF12, ARNT, ARNT2, AXIN1, AXIN2, BAD, BAX, BCL2, BCL2L1, BCR, BDKRB1, BDKRB2, BID, BIRC2, BIRC3, BIRC5, BIRC7, BIRC8, BMP2, BMP4, BRAF, BRCA2, CASP3, CASP8, CASP9, CBL, CBLB, CBLC, CCDC6, CCNA1, CCND1, CCNE1, CCNE2, CDC42, CDH1, CDK2, CDK4, CDK6, CDKN1A…	TRUE
KEGG:05321	KEGG_01.03.2017	Inflammatory bowel disease (IBD)	[-1]	[Group12, Group25]	12	18.4615	4.16891e-13	4.5858e-11	{Group12=4.205725438240467E-13, Group25=6.1255450354991566E-18}	{Group12=5.04687052588856E-12, Group25=9.80087205679865E-17}	[IFNG, IL10, IL1A, IL1B, IL2, IL4, IL6, NFKB1, RELA, SMAD3, STAT1, TNF]	[FOXP3, GATA3, HLA-DMA, HLA-DMB, HLA-DOA, HLA-DOB, HLA-DPA1, HLA-DPB1, HLA-DQA1, HLA-DQA2, HLA-DQB1, HLA-DRA, HLA-DRB1, HLA-DRB3, HLA-DRB4, HLA-DRB5, IFNG, IFNGR1, IFNGR2, IL10, IL12A, IL12B, IL12RB1, IL12RB2, IL13, IL17A, IL17F, IL18, IL18R1, IL18RAP, IL1A, IL1B, IL2, IL21, IL21R, IL22, IL23A, IL23R, IL2RG, IL4, IL4R, IL5, IL6, JUN, MAF, NFATC1, NFKB1, NOD2, RELA, RORA, RORC, SMAD2, SMAD3, STAT1…	TRUE
KEGG:05416	KEGG_01.03.2017	Viral myocarditis	[-1]	[Group00]	4	6.77966	0.00212892	0.0212892	{Group00=0.002128921379881647}	{Group00=0.004257842759763294}	[CASP3, CASP8, CD40LG, ICAM1]	[ABL1, ABL2, ACTB, ACTG1, BID, CASP3, CASP8, CASP9, CAV1, CCND1, CD28, CD40, CD40LG, CD55, CD80, CD86, CXADR, CYCS, DAG1, DMD, EIF4G1, EIF4G2, EIF4G3, FYN, HLA-A, HLA-B, HLA-C, HLA-DMA, HLA-DMB, HLA-DOA, HLA-DOB, HLA-DPA1, HLA-DPB1, HLA-DQA1, HLA-DQA2, HLA-DQB1, HLA-DRA, HLA-DRB1, HLA-DRB3, HLA-DRB4, HLA-DRB5, HLA-E, HLA-F, HLA-G, ICAM1, ITGAL, ITGB2, LAMA2, LOC102723407, MYH6, MYH7, PRF1, RAC1, …	TRUE
KEGG:05418	KEGG_01.03.2017	Fluid shear stress and atherosclerosis	[-1]	[Group05, Group16, Group25]	17	11.9718	5.78771e-15	6.77163e-13	{Group05=2.873685862761464E-18, Group16=6.693331547348122E-20, Group25=6.1255450354991566E-18}	{Group05=5.172634552970635E-17, Group16=1.4055996249431058E-18, Group25=9.80087205679865E-17}	[BCL2, CALM1, CCL2, FOS, HMOX1, ICAM1, IFNG, IL1A, IL1B, MAPK14, MAPK8, NFKB1, NOS3, PIK3R1, RELA, TNF, TP53]	[ACTB, ACTG1, ACVR1, ACVR2A, ACVR2B, AKT1, AKT2, AKT3, ARHGEF2, ASS1, BCL2, BMP4, BMPR1A, BMPR1B, BMPR2, CALM1, CALM2, CALM3, CALML3, CALML4, CALML5, CALML6, CAV1, CAV2, CAV3, CCL2, CDH5, CHUK, CTNNB1, CTSL, CYBA, CYBB, DUSP1, EDN1, FOS, GPC1, GSTA1, GSTA2, GSTA3, GSTA4, GSTA5, GSTM1, GSTM2, GSTM3, GSTM4, GSTM5, GSTO1, GSTO2, GSTP1, GSTT1, GSTT2, GSTT2B, HMOX1, HMOX2, HSP90AA1, HSP90AB1, HSP90B1,…	TRUE
KEGG:00590	KEGG_01.03.2017	Arachidonic acid metabolism	[-1]	[Group04, Group25]	3	4.83871	0.0197552	0.0395104	{Group04=8.768999845808076E-5, Group25=6.1255450354991566E-18}	{Group04=4.384499922904038E-4, Group25=9.80087205679865E-17}	[PLA2G4A, PTGS1, PTGS2]	[AKR1C3, ALOX12, ALOX12B, ALOX15, ALOX15B, ALOX5, CBR1, CBR3, CYP2B6, CYP2C19, CYP2C8, CYP2C9, CYP2E1, CYP2J2, CYP2U1, CYP4A11, CYP4F2, CYP4F3, CYP4F8, EPHX2, FAM213B, GGT1, GGT5, GPX1, GPX2, GPX3, GPX5, GPX6, GPX7, GPX8, HPGDS, JMJD7-PLA2G4B, LTA4H, LTC4S, PLA2G10, PLA2G12A, PLA2G12B, PLA2G16, PLA2G1B, PLA2G2A, PLA2G2C, PLA2G2D, PLA2G2E, PLA2G2F, PLA2G3, PLA2G4A, PLA2G4B, PLA2G4C, PLA2G4D, PLA2G…	FALSE
KEGG:04012	KEGG_01.03.2017	ErbB signaling pathway	[-1]	[Group24, Group25]	8	9.30232	1.10207e-06	7.05324e-05	{Group24=1.6198446768028198E-23, Group25=6.1255450354991566E-18}	{Group24=3.7256427566464854E-22, Group25=9.80087205679865E-17}	[EGFR, GRB2, MAPK1, MAPK3, MAPK8, PIK3R1, PRKCA, PRKCB]	[ABL1, ABL2, AKT1, AKT2, AKT3, ARAF, AREG, BAD, BRAF, BTC, BUB1B-PAK6, CAMK2A, CAMK2B, CAMK2D, CAMK2G, CBL, CBLB, CBLC, CDKN1A, CDKN1B, CRK, CRKL, EGF, EGFR, EIF4EBP1, ELK1, ERBB2, ERBB3, ERBB4, EREG, GAB1, GRB2, GSK3B, HBEGF, HRAS, JUN, KRAS, MAP2K1, MAP2K2, MAP2K4, MAP2K7, MAPK1, MAPK10, MAPK3, MAPK8, MAPK9, MTOR, MYC, NCK1, NCK2, NRAS, NRG1, NRG2, NRG3, NRG4, PAK1, PAK2, PAK3, PAK4, PAK5, PAK6…	FALSE
KEGG:04014	KEGG_01.03.2017	Ras signaling pathway	[-1]	[Group24, Group25]	13	5.72687	1.22205e-07	8.67657e-06	{Group24=1.6198446768028198E-23, Group25=6.1255450354991566E-18}	{Group24=3.7256427566464854E-22, Group25=9.80087205679865E-17}	[BCL2L1, CALM1, EGFR, GRB2, MAPK1, MAPK3, MAPK8, NFKB1, PIK3R1, PLA2G4A, PRKCA, PRKCB, RELA]	[ABL1, ABL2, AFDN, AKT1, AKT2, AKT3, ANGPT1, ANGPT2, ANGPT4, ARF6, BAD, BCL2L1, BRAP, BUB1B-PAK6, CALM1, CALM2, CALM3, CALML3, CALML4, CALML5, CALML6, CDC42, CHUK, CSF1, CSF1R, EFNA1, EFNA2, EFNA3, EFNA4, EFNA5, EGF, EGFR, ELK1, EPHA2, ETS1, ETS2, EXOC2, FASLG, FGF1, FGF10, FGF11, FGF12, FGF13, FGF14, FGF16, FGF17, FGF18, FGF19, FGF2, FGF20, FGF21, FGF22, FGF23, FGF3, FGF4, FGF5, FGF6, FGF7, FGF8…	FALSE
KEGG:04022	KEGG_01.03.2017	cGMP-PKG signaling pathway	[-1]	[Group08, Group20, Group23, Group25]	8	4.90798	0.000122463	0.00379636	{Group08=1.0989376730868003E-7, Group20=3.4212824879811116E-9, Group23=3.9857914471622045E-9, Group25=6.1255450354991566E-18}	{Group08=7.692563711607602E-7, Group20=3.0791542391830005E-8, Group23=3.1886331577297636E-8, Group25=9.80087205679865E-17}	[ATF2, CALM1, CREB1, MAPK1, MAPK3, NOS3, PIK3CG, PRKCE]	[ADCY1, ADCY2, ADCY3, ADCY4, ADCY5, ADCY6, ADCY7, ADCY8, ADCY9, ADORA1, ADORA3, ADRA1A, ADRA1B, ADRA1D, ADRA2A, ADRA2B, ADRA2C, ADRB1, ADRB2, ADRB3, AGTR1, AKT1, AKT2, AKT3, ATF2, ATF4, ATF6B, ATP1A1, ATP1A2, ATP1A3, ATP1A4, ATP1B1, ATP1B2, ATP1B3, ATP1B4, ATP2A1, ATP2A2, ATP2A3, ATP2B1, ATP2B2, ATP2B3, ATP2B4, BAD, BDKRB2, BORCS8-MEF2B, CACNA1C, CACNA1D, CACNA1F, CACNA1S, CALM1, CALM2, CALM3, CA…	FALSE
KEGG:04024	KEGG_01.03.2017	cAMP signaling pathway	[-1]	[Group13, Group15, Group22, Group25]	9	4.54545	8.11405e-05	0.00308334	{Group13=5.9735011611036426E-12, Group15=2.0979889133002987E-10, Group22=1.6057462163294384E-19, Group25=6.1255450354991566E-18}	{Group13=6.570851277214007E-11, Group15=2.097988913300299E-9, Group22=3.211492432658877E-18, Group25=9.80087205679865E-17}	[CALM1, CREB1, FOS, MAPK1, MAPK3, MAPK8, NFKB1, PIK3R1, RELA]	[ABCC4, ACOX1, ACOX3, ADCY1, ADCY10, ADCY2, ADCY3, ADCY4, ADCY5, ADCY6, ADCY7, ADCY8, ADCY9, ADCYAP1R1, ADORA1, ADORA2A, ADRB1, ADRB2, AFDN, AKT1, AKT2, AKT3, AMH, ARAP3, ATP1A1, ATP1A2, ATP1A3, ATP1A4, ATP1B1, ATP1B2, ATP1B3, ATP1B4, ATP2A2, ATP2B1, ATP2B2, ATP2B3, ATP2B4, BAD, BDNF, BRAF, CACNA1C, CACNA1D, CACNA1F, CACNA1S, CALM1, CALM2, CALM3, CALML3, CALML4, CALML5, CALML6, CAMK2A, CAMK2B, CA…	FALSE
KEGG:04060	KEGG_01.03.2017	Cytokine-cytokine receptor interaction	[-1]	[Group25]	17	6.2963	2.19664e-10	2.10877e-08	{Group25=6.1255450354991566E-18}	{Group25=9.80087205679865E-17}	[CCL2, CCR3, CD40LG, CSF2, CXCL10, CXCL11, CXCL2, CXCL8, EGFR, IFNG, IL10, IL1A, IL1B, IL2, IL4, IL6, TNF]	[ACKR3, ACVR1, ACVR1B, ACVR2A, ACVR2B, AMH, AMHR2, BMP2, BMP7, BMPR1A, BMPR1B, BMPR2, CCL1, CCL11, CCL13, CCL14, CCL15, CCL16, CCL17, CCL18, CCL19, CCL2, CCL20, CCL21, CCL22, CCL23, CCL24, CCL25, CCL26, CCL27, CCL28, CCL3, CCL3L1, CCL3L3, CCL4, CCL4L1, CCL4L2, CCL5, CCL7, CCL8, CCR1, CCR10, CCR2, CCR3, CCR4, CCR5, CCR6, CCR7, CCR8, CCR9, CD27, CD40, CD40LG, CD70, CLCF1, CNTF, CNTFR, CRLF2, CSF1, …	FALSE
KEGG:04062	KEGG_01.03.2017	Chemokine signaling pathway	[-1]	[Group25]	14	7.69231	8.09508e-10	7.20462e-08	{Group25=6.1255450354991566E-18}	{Group25=9.80087205679865E-17}	[CCL2, CCR3, CXCL10, CXCL11, CXCL2, CXCL8, GRB2, MAPK1, MAPK3, NFKB1, PIK3R1, PRKCB, RELA, STAT1]	[ADCY1, ADCY2, ADCY3, ADCY4, ADCY5, ADCY6, ADCY7, ADCY8, ADCY9, AKT1, AKT2, AKT3, ARRB1, ARRB2, BCAR1, BRAF, CCL1, CCL11, CCL13, CCL14, CCL15, CCL16, CCL17, CCL18, CCL19, CCL2, CCL20, CCL21, CCL22, CCL23, CCL24, CCL25, CCL26, CCL27, CCL28, CCL3, CCL3L1, CCL3L3, CCL4, CCL4L1, CCL4L2, CCL5, CCL7, CCL8, CCR1, CCR10, CCR2, CCR3, CCR4, CCR5, CCR6, CCR7, CCR8, CCR9, CDC42, CHUK, CRK, CRKL, CX3CL1, CX3C…	FALSE
KEGG:04064	KEGG_01.03.2017	NF-kappa B signaling pathway	[-1]	[Group25]	13	13.6842	2.26481e-12	2.446e-10	{Group25=6.1255450354991566E-18}	{Group25=9.80087205679865E-17}	[BCL2, BCL2L1, CD40LG, CXCL2, CXCL8, ICAM1, IL1B, NFKB1, PARP1, PRKCB, PTGS2, RELA, TNF]	[ATM, BCL10, BCL2, BCL2A1, BCL2L1, BIRC2, BIRC3, BLNK, BTK, CARD10, CARD11, CARD14, CCL13, CCL19, CCL21, CCL4, CCL4L1, CCL4L2, CD14, CD40, CD40LG, CFLAR, CHUK, CSNK2A1, CSNK2A2, CSNK2A3, CSNK2B, CXCL12, CXCL2, CXCL8, DDX58, ERC1, GADD45B, ICAM1, IKBKB, IKBKG, IL1B, IL1R1, IRAK1, IRAK4, LAT, LBP, LCK, LOC102723407, LTA, LTB, LTBR, LY96, LYN, MALT1, MAP3K14, MAP3K7, MYD88, NFKB1, NFKB2, NFKBIA, PAR…	FALSE
KEGG:04066	KEGG_01.03.2017	HIF-1 signaling pathway	[-1]	[Group25]	15	14.8515	1.05923e-14	1.22871e-12	{Group25=6.1255450354991566E-18}	{Group25=9.80087205679865E-17}	[BCL2, EGFR, HMOX1, IFNG, IL6, MAPK1, MAPK3, NFKB1, NOS2, NOS3, PIK3R1, PRKCA, PRKCB, RELA, SERPINE1]	[AKT1, AKT2, AKT3, ALDOA, ANGPT1, ANGPT2, ANGPT4, ARNT, BCL2, CAMK2A, CAMK2B, CAMK2D, CAMK2G, CDKN1A, CDKN1B, CREBBP, CUL2, CYBB, EDN1, EGF, EGFR, EGLN1, EGLN2, EGLN3, EIF4E, EIF4E1B, EIF4E2, EIF4EBP1, ELOB, ELOC, ENO1, ENO2, ENO3, EP300, EPO, ERBB2, FLT1, GAPDH, HIF1A, HK1, HK2, HK3, HKDC1, HMOX1, IFNG, IFNGR1, IFNGR2, IGF1, IGF1R, IL6, IL6R, INS, INSR, LDHA, LTBR, MAP2K1, MAP2K2, MAPK1, MAPK3, …	FALSE
KEGG:04068	KEGG_01.03.2017	FoxO signaling pathway	[-1]	[Group25]	11	8.33333	2.801e-08	2.12876e-06	{Group25=6.1255450354991566E-18}	{Group25=9.80087205679865E-17}	[CAT, EGFR, GRB2, IL10, IL6, MAPK1, MAPK14, MAPK3, MAPK8, PIK3R1, SMAD3]	[AGAP2, AKT1, AKT2, AKT3, ARAF, ATG12, ATM, BCL2L11, BCL6, BNIP3, BRAF, C8orf44-SGK3, CAT, CCNB1, CCNB2, CCNB3, CCND1, CCND2, CCNG2, CDK2, CDKN1A, CDKN1B, CDKN2B, CDKN2D, CHUK, CREBBP, CSNK1E, EGF, EGFR, EP300, FASLG, FBXO25, FBXO32, FOXG1, FOXO1, FOXO3, FOXO4, FOXO6, G6PC, G6PC2, G6PC3, GABARAP, GABARAPL1, GABARAPL2, GADD45A, GADD45B, GADD45G, GRB2, GRM1, HOMER1, HOMER2, HOMER3, HRAS, IGF1, IGF1…	FALSE
KEGG:04070	KEGG_01.03.2017	Phosphatidylinositol signaling system	[-1]	[Group25]	4	4.12371	0.012455	0.04982	{Group25=6.1255450354991566E-18}	{Group25=9.80087205679865E-17}	[CALM1, PIK3R1, PRKCA, PRKCB]	[CALM1, CALM2, CALM3, CALML3, CALML4, CALML5, CALML6, CDIPT, CDS1, CDS2, DGKA, DGKB, DGKD, DGKE, DGKG, DGKH, DGKI, DGKK, DGKQ, DGKZ, IMPA1, IMPA2, IMPAD1, INPP1, INPP4A, INPP4B, INPP5A, INPP5B, INPP5D, INPP5E, INPP5J, INPP5K, INPPL1, IP6K1, IP6K2, IP6K3, IPMK, IPPK, ITPK1, ITPKA, ITPKB, ITPKC, ITPR1, ITPR2, ITPR3, MTM1, MTMR1, MTMR14, MTMR2, MTMR3, MTMR4, MTMR6, MTMR7, MTMR8, OCRL, PI4K2A, PI4K2B…	FALSE
KEGG:04072	KEGG_01.03.2017	Phospholipase D signaling pathway	[-1]	[Group23, Group25]	9	6.16438	7.16391e-06	0.00036536	{Group23=3.9857914471622045E-9, Group25=6.1255450354991566E-18}	{Group23=3.1886331577297636E-8, Group25=9.80087205679865E-17}	[CXCL8, EGFR, GRB2, MAPK1, MAPK3, PIK3CG, PIK3R1, PLA2G4A, PRKCA]	[ADCY1, ADCY2, ADCY3, ADCY4, ADCY5, ADCY6, ADCY7, ADCY8, ADCY9, AGPAT1, AGPAT2, AGPAT3, AGPAT4, AGPAT5, AGTR1, AKT1, AKT2, AKT3, ARF1, ARF6, AVP, AVPR1A, AVPR1B, AVPR2, CXCL8, CXCR1, CXCR2, CYTH1, CYTH2, CYTH3, CYTH4, DGKA, DGKB, DGKD, DGKE, DGKG, DGKH, DGKI, DGKK, DGKQ, DGKZ, DNM1, DNM2, DNM3, EGF, EGFR, F2R, FCER1A, FCER1G, FYN, GAB1, GAB2, GNA12, GNA13, GNAS, GRB2, GRM1, GRM2, GRM3, GRM4, GRM5…	FALSE
KEGG:04115	KEGG_01.03.2017	p53 signaling pathway	[-1]	[Group11]	6	8.69565	3.93319e-05	0.00157328	{Group11=3.365147532546613E-14}	{Group11=4.711206545565258E-13}	[BAX, CASP3, CASP8, CDK4, SERPINE1, TP53]	[ADGRB1, APAF1, ATM, ATR, BAX, BBC3, BID, CASP3, CASP8, CASP9, CCNB1, CCNB2, CCNB3, CCND1, CCND2, CCND3, CCNE1, CCNE2, CCNG1, CCNG2, CD82, CDK1, CDK2, CDK4, CDK6, CDKN1A, CDKN2A, CHEK1, CHEK2, CYCS, DDB2, EI24, FAS, GADD45A, GADD45B, GADD45G, GORAB, GTSE1, IGF1, IGFBP3, MDM2, MDM4, PERP, PIDD1, PMAIP1, PPM1D, PTEN, RCHY1, RFWD2, RPRM, RRM2, RRM2B, SERPINB5, SERPINE1, SESN1, SESN2, SESN3, SFN, SHI…	FALSE
KEGG:04140	KEGG_01.03.2017	Autophagy	[-1]	[Group11, Group22, Group25]	7	5.42636	0.000180138	0.00468359	{Group11=3.365147532546613E-14, Group22=1.6057462163294384E-19, Group25=6.1255450354991566E-18}	{Group11=4.711206545565258E-13, Group22=3.211492432658877E-18, Group25=9.80087205679865E-17}	[BCL2, BCL2L1, CTSB, MAPK1, MAPK3, MAPK8, PIK3R1]	[AKT1, AKT1S1, AKT2, AKT3, AMBRA1, ATG10, ATG101, ATG12, ATG13, ATG14, ATG16L1, ATG16L2, ATG2A, ATG2B, ATG3, ATG4A, ATG4B, ATG4C, ATG4D, ATG5, ATG7, ATG9A, ATG9B, BAD, BCL2, BCL2L1, BECN1, BECN2, BNIP3, CAMKK2, CFLAR, CTSB, CTSD, CTSL, DAPK1, DAPK2, DAPK3, DDIT4, DEPTOR, EIF2AK3, EIF2AK4, EIF2S1, ERN1, GABARAP, GABARAPL1, GABARAPL2, HIF1A, HMGB1, HRAS, IGBP1, IGF1R, INS, IRS1, IRS2, IRS4, ITPR1, …	FALSE
KEGG:04150	KEGG_01.03.2017	mTOR signaling pathway	[-1]	[Group18, Group25]	7	4.60526	0.000492337	0.00984673	{Group18=1.7234766993344764E-7, Group25=6.1255450354991566E-18}	{Group18=1.0340860196006859E-6, Group25=9.80087205679865E-17}	[GRB2, MAPK1, MAPK3, PIK3R1, PRKCA, PRKCB, TNF]	[AKT1, AKT1S1, AKT2, AKT3, ATP6V1A, ATP6V1B1, ATP6V1B2, ATP6V1C1, ATP6V1C2, ATP6V1D, ATP6V1E1, ATP6V1E2, ATP6V1F, ATP6V1G1, ATP6V1G2, ATP6V1G3, ATP6V1H, BRAF, CAB39, CAB39L, CHUK, CLIP1, DDIT4, DEPDC5, DEPTOR, DVL1, DVL2, DVL3, EIF4B, EIF4E, EIF4E1B, EIF4E2, EIF4EBP1, FLCN, FNIP1, FNIP2, FZD1, FZD10, FZD2, FZD3, FZD4, FZD5, FZD6, FZD7, FZD8, FZD9, GRB10, GRB2, GSK3B, HRAS, IGF1, IGF1R, IKBKB, INS…	FALSE
KEGG:04151	KEGG_01.03.2017	PI3K-Akt signaling pathway	[-1]	[Group25]	20	5.84795	1.50486e-11	1.56506e-09	{Group25=6.1255450354991566E-18}	{Group25=9.80087205679865E-17}	[ATF2, BCL2, BCL2L1, CDK4, CREB1, EGFR, GRB2, IL2, IL4, IL6, MAPK1, MAPK3, MCL1, NFKB1, NOS3, PIK3CG, PIK3R1, PRKCA, RELA, TP53]	[AKT1, AKT2, AKT3, ANGPT1, ANGPT2, ANGPT4, ATF2, ATF4, ATF6B, BAD, BCL2, BCL2L1, BCL2L11, BRCA1, C8orf44-SGK3, CASP9, CCND1, CCND2, CCND3, CCNE1, CCNE2, CD19, CDC37, CDK2, CDK4, CDK6, CDKN1A, CDKN1B, CHAD, CHRM1, CHRM2, CHUK, COL1A1, COL1A2, COL2A1, COL4A1, COL4A2, COL4A3, COL4A4, COL4A5, COL4A6, COL6A1, COL6A2, COL6A3, COL6A5, COL6A6, COL9A1, COL9A2, COL9A3, COMP, CREB1, CREB3, CREB3L1, CREB3L2,…	FALSE
KEGG:04215	KEGG_01.03.2017	Apoptosis	[-1]	[Group11, Group22, Group25]	6	18.1818	4.7242e-07	3.11797e-05	{Group11=3.365147532546613E-14, Group22=1.6057462163294384E-19, Group25=6.1255450354991566E-18}	{Group11=4.711206545565258E-13, Group22=3.211492432658877E-18, Group25=9.80087205679865E-17}	[BAX, BCL2, BCL2L1, CASP3, CASP8, MAPK8]	[APAF1, BAK1, BAX, BBC3, BCL2, BCL2L1, BCL2L11, BECN1, BECN2, BID, BIRC2, BIRC3, BIRC5, BIRC6, BIRC7, BIRC8, BOK, CASP3, CASP7, CASP8, CASP9, CYCS, DIABLO, FADD, HTRA2, MAPK10, MAPK8, MAPK9, NGFR, PMAIP1, SEPT4, TNFRSF1A, XIAP]	FALSE
KEGG:04261	KEGG_01.03.2017	Adrenergic signaling in cardiomyocytes	[-1]	[Group20, Group25]	9	6.25	6.39825e-06	0.000332709	{Group20=3.4212824879811116E-9, Group25=6.1255450354991566E-18}	{Group20=3.0791542391830005E-8, Group25=9.80087205679865E-17}	[ATF2, BCL2, CALM1, CREB1, MAPK1, MAPK14, MAPK3, PIK3CG, PRKCA]	[ACTC1, ADCY1, ADCY2, ADCY3, ADCY4, ADCY5, ADCY6, ADCY7, ADCY8, ADCY9, ADRA1A, ADRA1B, ADRA1D, ADRB1, ADRB2, AGTR1, AGTR2, AKT1, AKT2, AKT3, ATF2, ATF4, ATF6B, ATP1A1, ATP1A2, ATP1A3, ATP1A4, ATP1B1, ATP1B2, ATP1B3, ATP1B4, ATP2A2, ATP2B1, ATP2B2, ATP2B3, ATP2B4, BCL2, CACNA1C, CACNA1D, CACNA1F, CACNA1S, CACNA2D1, CACNA2D2, CACNA2D3, CACNA2D4, CACNB1, CACNB2, CACNB3, CACNB4, CACNG1, CACNG2, CACNG…	FALSE
KEGG:04270	KEGG_01.03.2017	Vascular smooth muscle contraction	[-1]	[Group08, Group20, Group25]	7	5.78512	0.000120667	0.00386134	{Group08=1.0989376730868003E-7, Group20=3.4212824879811116E-9, Group25=6.1255450354991566E-18}	{Group08=7.692563711607602E-7, Group20=3.0791542391830005E-8, Group25=9.80087205679865E-17}	[CALM1, MAPK1, MAPK3, PLA2G4A, PRKCA, PRKCB, PRKCE]	[ACTA2, ACTG2, ADCY1, ADCY2, ADCY3, ADCY4, ADCY5, ADCY6, ADCY7, ADCY8, ADCY9, ADORA2A, ADORA2B, ADRA1A, ADRA1B, ADRA1D, AGTR1, ARAF, ARHGEF1, ARHGEF11, ARHGEF12, AVPR1A, AVPR1B, BRAF, CACNA1C, CACNA1D, CACNA1F, CACNA1S, CALCRL, CALD1, CALM1, CALM2, CALM3, CALML3, CALML4, CALML5, CALML6, CYP4A11, CYP4A22, EDNRA, GNA11, GNA12, GNA13, GNAQ, GNAS, GUCY1A2, GUCY1A3, GUCY1B3, ITPR1, ITPR2, ITPR3, JMJD7…	FALSE
KEGG:04320	KEGG_01.03.2017	Dorso-ventral axis formation	[-1]	[Group18, Group25]	4	14.2857	0.000118919	0.00392432	{Group18=1.7234766993344764E-7, Group25=6.1255450354991566E-18}	{Group18=1.0340860196006859E-6, Group25=9.80087205679865E-17}	[EGFR, GRB2, MAPK1, MAPK3]	[BRAF, CPEB1, CPEB2, CPEB3, CPEB4, EGFR, ETS1, ETS2, ETV6, ETV7, FMN2, GRB2, KRAS, MAP2K1, MAPK1, MAPK3, NOTCH1, NOTCH2, NOTCH3, NOTCH4, PIWIL1, PIWIL2, PIWIL3, PIWIL4, SOS1, SOS2, SPIRE1, SPIRE2]	FALSE
KEGG:04350	KEGG_01.03.2017	TGF-beta signaling pathway	[-1]	[Group06, Group18, Group25]	5	5.95238	0.00105403	0.0179186	{Group06=2.637389460959518E-13, Group18=1.7234766993344764E-7, Group25=6.1255450354991566E-18}	{Group06=3.4286062992473736E-12, Group18=1.0340860196006859E-6, Group25=9.80087205679865E-17}	[IFNG, MAPK1, MAPK3, SMAD3, TNF]	[ACVR1, ACVR1B, ACVR1C, ACVR2A, ACVR2B, AMH, AMHR2, BAMBI, BMP2, BMP4, BMP5, BMP6, BMP7, BMP8A, BMP8B, BMPR1A, BMPR1B, BMPR2, CDKN2B, CHRD, CREBBP, CUL1, DCN, E2F4, E2F5, EP300, FST, GDF5, GDF6, GDF7, ID1, ID2, ID3, ID4, IFNG, INHBA, INHBB, INHBC, INHBE, LEFTY1, LEFTY2, LTBP1, MAPK1, MAPK3, MINOS1-NBL1, MYC, NBL1, NODAL, NOG, PITX2, PPP2CA, PPP2CB, PPP2R1A, PPP2R1B, RBL1, RBX1, RHOA, ROCK1, RPS6K…	FALSE
KEGG:04370	KEGG_01.03.2017	VEGF signaling pathway	[-1]	[Group23, Group25]	10	16.9492	1.07418e-10	1.0527e-08	{Group23=3.9857914471622045E-9, Group25=6.1255450354991566E-18}	{Group23=3.1886331577297636E-8, Group25=9.80087205679865E-17}	[HSPB1, MAPK1, MAPK14, MAPK3, NOS3, PIK3R1, PLA2G4A, PRKCA, PRKCB, PTGS2]	[AKT1, AKT2, AKT3, BAD, CASP9, CDC42, HRAS, HSPB1, JMJD7-PLA2G4B, KDR, KRAS, MAP2K1, MAP2K2, MAPK1, MAPK11, MAPK12, MAPK13, MAPK14, MAPK3, MAPKAPK2, MAPKAPK3, NFATC2, NOS3, NRAS, PIK3CA, PIK3CB, PIK3CD, PIK3R1, PIK3R2, PIK3R3, PLA2G4A, PLA2G4B, PLA2G4C, PLA2G4D, PLA2G4E, PLA2G4F, PLCG1, PLCG2, PPP3CA, PPP3CB, PPP3CC, PPP3R1, PPP3R2, PRKCA, PRKCB, PRKCG, PTGS2, PTK2, PXN, RAC1, RAC2, RAC3, RAF1, S…	FALSE
KEGG:04371	KEGG_01.03.2017	Apelin signaling pathway	[-1]	[Group08, Group20, Group25]	9	6.52174	4.50718e-06	0.000243388	{Group08=1.0989376730868003E-7, Group20=3.4212824879811116E-9, Group25=6.1255450354991566E-18}	{Group08=7.692563711607602E-7, Group20=3.0791542391830005E-8, Group25=9.80087205679865E-17}	[CALM1, MAPK1, MAPK3, NOS2, NOS3, PIK3CG, PRKCE, SERPINE1, SMAD3]	[ACTA2, ADCY1, ADCY10, ADCY2, ADCY3, ADCY4, ADCY5, ADCY6, ADCY7, ADCY8, ADCY9, AGTR1, AKT1, AKT2, AKT3, APLN, APLNR, BECN1, BECN2, BORCS8-MEF2B, CALM1, CALM2, CALM3, CALML3, CALML4, CALML5, CALML6, CAMK4, CCND1, CDH1, CTGF, EGR1, GABARAP, GABARAPL1, GABARAPL2, GNA13, GNAI1, GNAI2, GNAI3, GNAQ, GNB1, GNB2, GNB3, GNB4, GNB5, GNG10, GNG11, GNG12, GNG13, GNG2, GNG3, GNG4, GNG5, GNG7, GNG8, GNGT1, GNG…	FALSE
KEGG:04510	KEGG_01.03.2017	Focal adhesion	[-1]	[Group25]	9	4.52261	8.43617e-05	0.00303702	{Group25=6.1255450354991566E-18}	{Group25=9.80087205679865E-17}	[BCL2, EGFR, GRB2, MAPK1, MAPK3, MAPK8, PIK3R1, PRKCA, PRKCB]	[ACTB, ACTG1, ACTN1, ACTN4, AKT1, AKT2, AKT3, ARHGAP35, ARHGAP5, BAD, BCAR1, BCL2, BIRC2, BIRC3, BRAF, BUB1B-PAK6, CAPN2, CAV1, CAV2, CAV3, CCND1, CCND2, CCND3, CDC42, CHAD, COL1A1, COL1A2, COL2A1, COL4A1, COL4A2, COL4A3, COL4A4, COL4A5, COL4A6, COL6A1, COL6A2, COL6A3, COL6A5, COL6A6, COL9A1, COL9A2, COL9A3, COMP, CRK, CRKL, CTNNB1, DIAPH1, DOCK1, EGF, EGFR, ELK1, ERBB2, FLNA, FLNB, FLNC, FLT1, F…	FALSE
KEGG:04520	KEGG_01.03.2017	Adherens junction	[-1]	[Group08, Group18, Group25]	4	5.55556	0.00439661	0.0263797	{Group08=1.0989376730868003E-7, Group18=1.7234766993344764E-7, Group25=6.1255450354991566E-18}	{Group08=7.692563711607602E-7, Group18=1.0340860196006859E-6, Group25=9.80087205679865E-17}	[EGFR, MAPK1, MAPK3, SMAD3]	[ACP1, ACTB, ACTG1, ACTN1, ACTN4, AFDN, BAIAP2, CDC42, CDH1, CREBBP, CSNK2A1, CSNK2A2, CSNK2A3, CSNK2B, CTNNA1, CTNNA2, CTNNA3, CTNNB1, CTNND1, EGFR, EP300, ERBB2, FARP2, FER, FGFR1, FYN, IGF1R, INSR, IQGAP1, LEF1, LMO7, MAP3K7, MAPK1, MAPK3, MET, NECTIN1, NECTIN2, NECTIN3, NECTIN4, NLK, PARD3, PTPN1, PTPN6, PTPRB, PTPRF, PTPRJ, PTPRM, RAC1, RAC2, RAC3, RHOA, SMAD2, SMAD3, SMAD4, SNAI1, SNAI2, SO…	FALSE
KEGG:04540	KEGG_01.03.2017	Gap junction	[-1]	[Group25]	6	6.81818	0.000154843	0.00449044	{Group25=6.1255450354991566E-18}	{Group25=9.80087205679865E-17}	[EGFR, GRB2, MAPK1, MAPK3, PRKCA, PRKCB]	[ADCY1, ADCY2, ADCY3, ADCY4, ADCY5, ADCY6, ADCY7, ADCY8, ADCY9, ADRB1, CDK1, CSNK1D, DRD1, DRD2, EGF, EGFR, GJA1, GJD2, GNA11, GNAI1, GNAI2, GNAI3, GNAQ, GNAS, GRB2, GRM1, GRM5, GUCY1A2, GUCY1A3, GUCY1B3, HRAS, HTR2A, HTR2B, HTR2C, ITPR1, ITPR2, ITPR3, KRAS, LPAR1, MAP2K1, MAP2K2, MAP2K5, MAP3K2, MAPK1, MAPK3, MAPK7, NRAS, PDGFA, PDGFB, PDGFC, PDGFD, PDGFRA, PDGFRB, PLCB1, PLCB2, PLCB3, PLCB4, PR…	FALSE
KEGG:04550	KEGG_01.03.2017	Signaling pathways regulating pluripotency of stem cells	[-1]	[Group18, Group23, Group25]	6	4.31655	0.00177142	0.0212571	{Group18=1.7234766993344764E-7, Group23=3.9857914471622045E-9, Group25=6.1255450354991566E-18}	{Group18=1.0340860196006859E-6, Group23=3.1886331577297636E-8, Group25=9.80087205679865E-17}	[GRB2, MAPK1, MAPK14, MAPK3, PIK3R1, SMAD3]	[ACVR1, ACVR1B, ACVR1C, ACVR2A, ACVR2B, AKT1, AKT2, AKT3, APC, APC2, AXIN1, AXIN2, BMI1, BMP4, BMPR1A, BMPR1B, BMPR2, COMMD3-BMI1, CTNNB1, DLX5, DUSP9, DVL1, DVL2, DVL3, ESRRB, ESX1, FGF2, FGFR1, FGFR2, FGFR3, FGFR4, FZD1, FZD10, FZD2, FZD3, FZD4, FZD5, FZD6, FZD7, FZD8, FZD9, GRB2, GSK3B, HAND1, HESX1, HNF1A, HOXB1, HRAS, ID1, ID2, ID3, ID4, IGF1, IGF1R, IL6ST, INHBA, INHBB, INHBC, INHBE, ISL1, …	FALSE
KEGG:04611	KEGG_01.03.2017	Platelet activation	[-1]	[Group20, Group23, Group25]	8	6.50406	1.63013e-05	0.000782464	{Group20=3.4212824879811116E-9, Group23=3.9857914471622045E-9, Group25=6.1255450354991566E-18}	{Group20=3.0791542391830005E-8, Group23=3.1886331577297636E-8, Group25=9.80087205679865E-17}	[MAPK1, MAPK14, MAPK3, NOS3, PIK3CG, PIK3R1, PLA2G4A, PTGS1]	[ACTB, ACTG1, ADCY1, ADCY2, ADCY3, ADCY4, ADCY5, ADCY6, ADCY7, ADCY8, ADCY9, AKT1, AKT2, AKT3, APBB1IP, ARHGAP35, ARHGEF1, ARHGEF12, BTK, COL1A1, COL1A2, COL3A1, F2R, F2RL3, FCER1G, FCGR2A, FERMT3, FGA, FGB, FGG, FYN, GNA13, GNAI1, GNAI2, GNAI3, GNAQ, GNAS, GP1BA, GP1BB, GP5, GP6, GP9, GUCY1A2, GUCY1A3, GUCY1B3, ITGA2, ITGA2B, ITGB1, ITGB3, ITPR1, ITPR2, ITPR3, JMJD7-PLA2G4B, LCP2, LYN, MAPK1, MA…	FALSE
KEGG:04620	KEGG_01.03.2017	Toll-like receptor signaling pathway	[-1]	[Group19, Group25]	16	15.3846	6.81182e-16	8.2423e-14	{Group19=3.087782314701002E-27, Group25=6.1255450354991566E-18}	{Group19=7.719455786752505E-26, Group25=9.80087205679865E-17}	[CASP8, CXCL10, CXCL11, CXCL8, FOS, IL1B, IL6, MAPK1, MAPK14, MAPK3, MAPK8, NFKB1, PIK3R1, RELA, STAT1, TNF]	[AKT1, AKT2, AKT3, CASP8, CCL3, CCL3L1, CCL3L3, CCL4, CCL4L1, CCL4L2, CCL5, CD14, CD40, CD80, CD86, CHUK, CTSK, CXCL10, CXCL11, CXCL8, CXCL9, FADD, FOS, IFNA1, IFNA10, IFNA13, IFNA14, IFNA16, IFNA17, IFNA2, IFNA21, IFNA4, IFNA5, IFNA6, IFNA7, IFNA8, IFNAR1, IFNAR2, IFNB1, IKBKB, IKBKE, IKBKG, IL12A, IL12B, IL1B, IL6, IRAK1, IRAK4, IRF3, IRF5, IRF7, JUN, LBP, LY96, MAP2K1, MAP2K2, MAP2K3, MAP2K4, …	FALSE
KEGG:04621	KEGG_01.03.2017	NOD-like receptor signaling pathway	[-1]	[Group17, Group19, Group22, Group25]	17	10	1.21205e-13	1.34537e-11	{Group17=2.069840670066042E-27, Group19=3.087782314701002E-27, Group22=1.6057462163294384E-19, Group25=6.1255450354991566E-18}	{Group17=5.381585742171709E-26, Group19=7.719455786752505E-26, Group22=3.211492432658877E-18, Group25=9.80087205679865E-17}	[BCL2, BCL2L1, CASP8, CCL2, CTSB, CXCL2, CXCL8, IL1B, IL6, MAPK1, MAPK14, MAPK3, MAPK8, NFKB1, RELA, STAT1, TNF]	[AIM2, ANTXR1, ANTXR2, ATG12, ATG16L1, ATG5, BCL2, BCL2L1, BIRC2, BIRC3, BRCC3, CAMP, CARD16, CARD17, CARD18, CARD6, CARD8, CARD9, CASP1, CASP12, CASP4, CASP5, CASP8, CASR, CCL2, CCL5, CHUK, CTSB, CXCL1, CXCL2, CXCL3, CXCL8, CYBA, CYBB, DHX33, DNM1L, ERBIN, FADD, GABARAP, GABARAPL1, GABARAPL2, GBP1, GBP2, GBP3, GBP4, GBP5, GBP7, GPRC6A, GSDMD, HSP90AA1, HSP90AB1, IFI16, IFNA1, IFNA10, IFNA13, IFN…	FALSE
KEGG:04622	KEGG_01.03.2017	RIG-I-like receptor signaling pathway	[-1]	[Group25]	8	11.4286	2.20508e-07	1.49946e-05	{Group25=6.1255450354991566E-18}	{Group25=9.80087205679865E-17}	[CASP8, CXCL10, CXCL8, MAPK14, MAPK8, NFKB1, RELA, TNF]	[ATG12, ATG5, AZI2, CASP10, CASP8, CHUK, CXCL10, CXCL8, CYLD, DDX3X, DDX58, DHX58, FADD, IFIH1, IFNA1, IFNA10, IFNA13, IFNA14, IFNA16, IFNA17, IFNA2, IFNA21, IFNA4, IFNA5, IFNA6, IFNA7, IFNA8, IFNB1, IFNE, IFNK, IFNW1, IKBKB, IKBKE, IKBKG, IL12A, IL12B, IRF3, IRF7, ISG15, MAP3K1, MAP3K7, MAPK10, MAPK11, MAPK12, MAPK13, MAPK14, MAPK8, MAPK9, MAVS, NFKB1, NFKBIA, NFKBIB, NLRX1, OTUD5, PIN1, RELA, R…	FALSE
KEGG:04623	KEGG_01.03.2017	Cytosolic DNA-sensing pathway	[-1]	[Group15, Group25]	5	7.8125	0.000300409	0.0069094	{Group15=2.0979889133002987E-10, Group25=6.1255450354991566E-18}	{Group15=2.097988913300299E-9, Group25=9.80087205679865E-17}	[CXCL10, IL1B, IL6, NFKB1, RELA]	[ADAR, AIM2, CASP1, CCL4, CCL4L1, CCL4L2, CCL5, CHUK, CXCL10, DDX58, IFNA1, IFNA10, IFNA13, IFNA14, IFNA16, IFNA17, IFNA2, IFNA21, IFNA4, IFNA5, IFNA6, IFNA7, IFNA8, IFNB1, IKBKB, IKBKE, IKBKG, IL18, IL1B, IL33, IL6, IRF3, IRF7, LOC101060521, MAVS, MB21D1, NFKB1, NFKBIA, NFKBIB, POLR1C, POLR1D, POLR2E, POLR2F, POLR2H, POLR2K, POLR2L, POLR3A, POLR3B, POLR3C, POLR3D, POLR3E, POLR3F, POLR3G, POLR3GL…	FALSE
KEGG:04630	KEGG_01.03.2017	Jak-STAT signaling pathway	[-1]	[Group12]	12	7.69231	1.51698e-08	1.21358e-06	{Group12=4.205725438240467E-13}	{Group12=5.04687052588856E-12}	[BCL2, BCL2L1, CSF2, GRB2, IFNG, IL10, IL2, IL4, IL6, MCL1, PIK3R1, STAT1]	[AKT1, AKT2, AKT3, AOX1, BCL2, BCL2L1, CCND1, CCND2, CCND3, CDKN1A, CISH, CNTF, CNTFR, CREBBP, CRLF2, CSF2, CSF2RA, CSF2RB, CSF3, CSF3R, CSH1, CSH2, CTF1, EP300, EPO, EPOR, FHL1, GFAP, GH1, GH2, GHR, GRB2, HRAS, IFNA1, IFNA10, IFNA13, IFNA14, IFNA16, IFNA17, IFNA2, IFNA21, IFNA4, IFNA5, IFNA6, IFNA7, IFNA8, IFNAR1, IFNAR2, IFNB1, IFNE, IFNG, IFNGR1, IFNGR2, IFNK, IFNL1, IFNL2, IFNL3, IFNLR1, IFNW…	FALSE
KEGG:04640	KEGG_01.03.2017	Hematopoietic cell lineage	[-1]	[Group25]	8	8.24742	2.76882e-06	0.000160592	{Group25=6.1255450354991566E-18}	{Group25=9.80087205679865E-17}	[ANPEP, CD4, CSF2, IL1A, IL1B, IL4, IL6, TNF]	[ANPEP, CD14, CD19, CD1A, CD1B, CD1C, CD1D, CD1E, CD2, CD22, CD24, CD33, CD34, CD36, CD37, CD38, CD3D, CD3E, CD3G, CD4, CD44, CD5, CD55, CD59, CD7, CD8A, CD8B, CD9, CR1, CR2, CSF1, CSF1R, CSF2, CSF2RA, CSF3, CSF3R, DNTT, EPO, EPOR, FCER2, FCGR1A, FLT3, FLT3LG, GP1BA, GP1BB, GP5, GP9, GYPA, HLA-DMA, HLA-DMB, HLA-DOA, HLA-DOB, HLA-DPA1, HLA-DPB1, HLA-DQA1, HLA-DQA2, HLA-DQB1, HLA-DRA, HLA-DRB1, HLA…	FALSE
KEGG:04657	KEGG_01.03.2017	IL-17 signaling pathway	[-1]	[Group25]	20	21.5054	7.06108e-23	9.1088e-21	{Group25=6.1255450354991566E-18}	{Group25=9.80087205679865E-17}	[CASP3, CASP8, CCL2, CSF2, CXCL10, CXCL2, CXCL8, FOS, IFNG, IL1B, IL4, IL6, MAPK1, MAPK14, MAPK3, MAPK8, NFKB1, PTGS2, RELA, TNF]	[ANAPC5, CASP3, CASP8, CCL11, CCL17, CCL2, CCL20, CCL7, CEBPB, CHUK, CSF2, CSF3, CXCL1, CXCL10, CXCL2, CXCL3, CXCL5, CXCL6, CXCL8, DEFB4A, DEFB4B, ELAVL1, FADD, FOS, FOSB, FOSL1, GSK3B, HSP90AA1, HSP90AB1, HSP90B1, IFNG, IKBKB, IKBKE, IKBKG, IL13, IL17A, IL17B, IL17C, IL17D, IL17F, IL17RA, IL17RB, IL17RC, IL17RE, IL1B, IL25, IL4, IL5, IL6, JUN, JUND, LCN2, MAP3K7, MAPK1, MAPK10, MAPK11, MAPK12, M…	FALSE
KEGG:04658	KEGG_01.03.2017	Th1 and Th2 cell differentiation	[-1]	[Group17, Group21, Group25]	12	13.0435	3.0974e-11	3.12838e-09	{Group17=2.069840670066042E-27, Group21=3.0946781157773867E-27, Group25=6.1255450354991566E-18}	{Group17=5.381585742171709E-26, Group21=7.427227477865728E-26, Group25=9.80087205679865E-17}	[CD4, FOS, IFNG, IL2, IL4, MAPK1, MAPK14, MAPK3, MAPK8, NFKB1, RELA, STAT1]	[CD247, CD3D, CD3E, CD3G, CD4, CHUK, DLL1, DLL3, DLL4, FOS, GATA3, HLA-DMA, HLA-DMB, HLA-DOA, HLA-DOB, HLA-DPA1, HLA-DPB1, HLA-DQA1, HLA-DQA2, HLA-DQB1, HLA-DRA, HLA-DRB1, HLA-DRB3, HLA-DRB4, HLA-DRB5, IFNG, IFNGR1, IFNGR2, IKBKB, IKBKG, IL12A, IL12B, IL12RB1, IL12RB2, IL13, IL2, IL2RA, IL2RB, IL2RG, IL4, IL4R, IL5, JAG1, JAG2, JAK1, JAK2, JAK3, JUN, LAT, LCK, MAF, MAML1, MAML2, MAML3, MAPK1, MAP…	FALSE
KEGG:04659	KEGG_01.03.2017	Th17 cell differentiation	[-1]	[Group21, Group25]	15	14.0187	2.57607e-14	2.93672e-12	{Group21=3.0946781157773867E-27, Group25=6.1255450354991566E-18}	{Group21=7.427227477865728E-26, Group25=9.80087205679865E-17}	[CD4, FOS, IFNG, IL1B, IL2, IL4, IL6, MAPK1, MAPK14, MAPK3, MAPK8, NFKB1, RELA, SMAD3, STAT1]	[AHR, CD247, CD3D, CD3E, CD3G, CD4, CHUK, FOS, FOXP3, GATA3, HIF1A, HLA-DMA, HLA-DMB, HLA-DOA, HLA-DOB, HLA-DPA1, HLA-DPB1, HLA-DQA1, HLA-DQA2, HLA-DQB1, HLA-DRA, HLA-DRB1, HLA-DRB3, HLA-DRB4, HLA-DRB5, HSP90AA1, HSP90AB1, IFNG, IFNGR1, IFNGR2, IKBKB, IKBKG, IL12RB1, IL17A, IL17D, IL17F, IL1B, IL1R1, IL1RAP, IL2, IL21, IL21R, IL22, IL23A, IL23R, IL27RA, IL2RA, IL2RB, IL2RG, IL4, IL4R, IL6, IL6R, …	FALSE
KEGG:04660	KEGG_01.03.2017	T cell receptor signaling pathway	[-1]	[Group21, Group25]	17	16.5049	2.14415e-17	2.70162e-15	{Group21=3.0946781157773867E-27, Group25=6.1255450354991566E-18}	{Group21=7.427227477865728E-26, Group25=9.80087205679865E-17}	[CD4, CD40LG, CDK4, CSF2, FOS, GRB2, IFNG, IL10, IL2, IL4, MAPK1, MAPK14, MAPK3, NFKB1, PIK3R1, RELA, TNF]	[AKT1, AKT2, AKT3, BCL10, BUB1B-PAK6, CARD11, CBL, CBLB, CBLC, CD247, CD28, CD3D, CD3E, CD3G, CD4, CD40LG, CD8A, CD8B, CDC42, CDK4, CHUK, CSF2, CTLA4, DLG1, FOS, FYN, GRAP2, GRB2, GSK3B, HRAS, ICOS, IFNG, IKBKB, IKBKG, IL10, IL2, IL4, IL5, ITK, JUN, KRAS, LAT, LCK, LCP2, MALT1, MAP2K1, MAP2K2, MAP2K7, MAP3K14, MAP3K7, MAP3K8, MAPK1, MAPK11, MAPK12, MAPK13, MAPK14, MAPK3, MAPK9, NCK1, NCK2, NFATC1…	FALSE
KEGG:04662	KEGG_01.03.2017	B cell receptor signaling pathway	[-1]	[Group21, Group25]	9	12.6761	1.43081e-08	1.15895e-06	{Group21=3.0946781157773867E-27, Group25=6.1255450354991566E-18}	{Group21=7.427227477865728E-26, Group25=9.80087205679865E-17}	[CD81, FOS, GRB2, MAPK1, MAPK3, NFKB1, PIK3R1, PRKCB, RELA]	[AKT1, AKT2, AKT3, BCL10, BLNK, BTK, CARD11, CD19, CD22, CD72, CD79A, CD79B, CD81, CHUK, CR2, DAPP1, FCGR2B, FOS, GRB2, GSK3B, HRAS, IFITM1, IKBKB, IKBKG, INPP5D, INPPL1, JUN, KRAS, LILRB3, LOC102723407, LYN, MALT1, MAP2K1, MAP2K2, MAPK1, MAPK3, NFATC1, NFATC2, NFATC3, NFKB1, NFKBIA, NFKBIB, NFKBIE, NRAS, PIK3AP1, PIK3CA, PIK3CB, PIK3CD, PIK3R1, PIK3R2, PIK3R3, PLCG2, PPP3CA, PPP3CB, PPP3CC, PPP3…	FALSE
KEGG:04666	KEGG_01.03.2017	Fc gamma R-mediated phagocytosis	[-1]	[Group23, Group25]	7	7.69231	1.92723e-05	0.000905799	{Group23=3.9857914471622045E-9, Group25=6.1255450354991566E-18}	{Group23=3.1886331577297636E-8, Group25=9.80087205679865E-17}	[MAPK1, MAPK3, PIK3R1, PLA2G4A, PRKCA, PRKCB, PRKCE]	[AKT1, AKT2, AKT3, AMPH, ARF6, ARPC1A, ARPC1B, ARPC2, ARPC3, ARPC4, ARPC5, ARPC5L, ASAP1, ASAP2, ASAP3, BIN1, CDC42, CFL1, CFL2, CRK, CRKL, DNM2, DOCK2, FCGR1A, FCGR2A, FCGR2B, FCGR3A, GAB2, GSN, HCK, INPP5D, INPPL1, LAT, LIMK1, LIMK2, LOC102723407, LYN, MAP2K1, MAPK1, MAPK3, MARCKS, MARCKSL1, MYO10, NCF1, PAK1, PIK3CA, PIK3CB, PIK3CD, PIK3R1, PIK3R2, PIK3R3, PIP5K1A, PIP5K1B, PIP5K1C, PLA2G4A, P…	FALSE
KEGG:04670	KEGG_01.03.2017	Leukocyte transendothelial migration	[-1]	[Group25]	5	4.38596	0.00404574	0.0283202	{Group25=6.1255450354991566E-18}	{Group25=9.80087205679865E-17}	[ICAM1, MAPK14, PIK3R1, PRKCA, PRKCB]	[ACTB, ACTG1, ACTN1, ACTN4, AFDN, ARHGAP35, ARHGAP5, BCAR1, CD99, CDC42, CDH5, CLDN1, CLDN10, CLDN11, CLDN14, CLDN15, CLDN16, CLDN17, CLDN18, CLDN19, CLDN2, CLDN20, CLDN22, CLDN23, CLDN24, CLDN25, CLDN3, CLDN4, CLDN5, CLDN6, CLDN7, CLDN8, CLDN9, CTNNA1, CTNNA2, CTNNA3, CTNNB1, CTNND1, CXCL12, CXCR4, CYBA, CYBB, ESAM, EZR, F11R, GNAI1, GNAI2, GNAI3, ICAM1, ITGA4, ITGAL, ITGAM, ITGB1, ITGB2, ITK, J…	FALSE
KEGG:04672	KEGG_01.03.2017	Intestinal immune network for IgA production	[-1]	[Group12, Group25]	5	10.2041	8.36713e-05	0.00309584	{Group12=4.205725438240467E-13, Group25=6.1255450354991566E-18}	{Group12=5.04687052588856E-12, Group25=9.80087205679865E-17}	[CD40LG, IL10, IL2, IL4, IL6]	[AICDA, CCL25, CCL28, CCR10, CCR9, CD28, CD40, CD40LG, CD80, CD86, CXCL12, CXCR4, HLA-DMA, HLA-DMB, HLA-DOA, HLA-DOB, HLA-DPA1, HLA-DPB1, HLA-DQA1, HLA-DQA2, HLA-DQB1, HLA-DRA, HLA-DRB1, HLA-DRB3, HLA-DRB4, HLA-DRB5, ICOS, ICOSLG, IL10, IL15, IL15RA, IL2, IL4, IL5, IL6, ITGA4, ITGB7, LOC102723407, LOC102723996, LTBR, MADCAM1, MAP3K14, PIGR, TGFB1, TNFRSF13B, TNFRSF13C, TNFRSF17, TNFSF13, TNFSF13B]	FALSE
KEGG:04713	KEGG_01.03.2017	Circadian entrainment	[-1]	[Group20, Group25]	7	7.29167	2.7359e-05	0.0012038	{Group20=3.4212824879811116E-9, Group25=6.1255450354991566E-18}	{Group20=3.0791542391830005E-8, Group25=9.80087205679865E-17}	[CALM1, CREB1, FOS, MAPK1, MAPK3, PRKCA, PRKCB]	[ADCY1, ADCY10, ADCY2, ADCY3, ADCY4, ADCY5, ADCY6, ADCY7, ADCY8, ADCY9, ADCYAP1R1, CACNA1C, CACNA1D, CACNA1G, CACNA1H, CACNA1I, CALM1, CALM2, CALM3, CALML3, CALML4, CALML5, CALML6, CAMK2A, CAMK2B, CAMK2D, CAMK2G, CREB1, FOS, GNAI1, GNAI2, GNAI3, GNAO1, GNAQ, GNAS, GNB1, GNB2, GNB3, GNB4, GNB5, GNG10, GNG11, GNG12, GNG13, GNG2, GNG3, GNG4, GNG5, GNG7, GNG8, GNGT1, GNGT2, GRIA1, GRIA2, GRIA3, GRIA4…	FALSE
KEGG:04720	KEGG_01.03.2017	Long-term potentiation	[-1]	[Group06, Group20, Group25]	5	7.46269	0.000372418	0.00782078	{Group06=2.637389460959518E-13, Group20=3.4212824879811116E-9, Group25=6.1255450354991566E-18}	{Group06=3.4286062992473736E-12, Group20=3.0791542391830005E-8, Group25=9.80087205679865E-17}	[CALM1, MAPK1, MAPK3, PRKCA, PRKCB]	[ADCY1, ADCY8, ARAF, ATF4, BRAF, CACNA1C, CALM1, CALM2, CALM3, CALML3, CALML4, CALML5, CALML6, CAMK2A, CAMK2B, CAMK2D, CAMK2G, CAMK4, CREBBP, EP300, GNAQ, GRIA1, GRIA2, GRIN1, GRIN2A, GRIN2B, GRIN2C, GRIN2D, GRM1, GRM5, HRAS, ITPR1, ITPR2, ITPR3, KRAS, MAP2K1, MAP2K2, MAPK1, MAPK3, NRAS, PLCB1, PLCB2, PLCB3, PLCB4, PPP1CA, PPP1CB, PPP1CC, PPP1R1A, PPP3CA, PPP3CB, PPP3CC, PPP3R1, PPP3R2, PRKACA, P…	FALSE
KEGG:04722	KEGG_01.03.2017	Neurotrophin signaling pathway	[-1]	[Group05, Group16, Group22, Group25]	12	10.084	6.6781e-10	6.14385e-08	{Group05=2.873685862761464E-18, Group16=6.693331547348122E-20, Group22=1.6057462163294384E-19, Group25=6.1255450354991566E-18}	{Group05=5.172634552970635E-17, Group16=1.4055996249431058E-18, Group22=3.211492432658877E-18, Group25=9.80087205679865E-17}	[BAX, BCL2, CALM1, GRB2, MAPK1, MAPK14, MAPK3, MAPK8, NFKB1, PIK3R1, RELA, TP53]	[ABL1, AKT1, AKT2, AKT3, ARHGDIA, ARHGDIB, ARHGDIG, ATF4, BAD, BAX, BCL2, BDNF, BEX3, BRAF, CALM1, CALM2, CALM3, CALML3, CALML4, CALML5, CALML6, CAMK2A, CAMK2B, CAMK2D, CAMK2G, CAMK4, CDC42, CRK, CRKL, FASLG, FOXO3, FRS2, GAB1, GRB2, GSK3B, HRAS, IKBKB, IRAK1, IRAK2, IRAK3, IRAK4, IRS1, JUN, KIDINS220, KRAS, MAGED1, MAP2K1, MAP2K2, MAP2K5, MAP2K7, MAP3K1, MAP3K3, MAP3K5, MAPK1, MAPK10, MAPK11, MA…	FALSE
KEGG:04723	KEGG_01.03.2017	Retrograde endocannabinoid signaling	[-1]	[Group25]	7	6.93069	3.80588e-05	0.00156041	{Group25=6.1255450354991566E-18}	{Group25=9.80087205679865E-17}	[MAPK1, MAPK14, MAPK3, MAPK8, PRKCA, PRKCB, PTGS2]	[ABHD6, ADCY1, ADCY2, ADCY3, ADCY4, ADCY5, ADCY6, ADCY7, ADCY8, ADCY9, CACNA1A, CACNA1B, CACNA1C, CACNA1D, CACNA1F, CACNA1S, CNR1, DAGLA, DAGLB, FAAH, GABRA1, GABRA2, GABRA3, GABRA4, GABRA5, GABRA6, GABRB1, GABRB2, GABRB3, GABRD, GABRE, GABRG1, GABRG2, GABRG3, GABRP, GABRQ, GABRR1, GABRR2, GABRR3, GNAI1, GNAI2, GNAI3, GNAO1, GNAQ, GNB1, GNB2, GNB3, GNB4, GNB5, GNG10, GNG11, GNG12, GNG13, GNG2, GN…	FALSE
KEGG:04724	KEGG_01.03.2017	Glutamatergic synapse	[-1]	[Group23, Group25]	5	4.38596	0.00404574	0.0283202	{Group23=3.9857914471622045E-9, Group25=6.1255450354991566E-18}	{Group23=3.1886331577297636E-8, Group25=9.80087205679865E-17}	[MAPK1, MAPK3, PLA2G4A, PRKCA, PRKCB]	[ADCY1, ADCY2, ADCY3, ADCY4, ADCY5, ADCY6, ADCY7, ADCY8, ADCY9, CACNA1A, CACNA1C, CACNA1D, DLG4, DLGAP1, GLS, GLS2, GLUL, GNAI1, GNAI2, GNAI3, GNAO1, GNAQ, GNAS, GNB1, GNB2, GNB3, GNB4, GNB5, GNG10, GNG11, GNG12, GNG13, GNG2, GNG3, GNG4, GNG5, GNG7, GNG8, GNGT1, GNGT2, GRIA1, GRIA2, GRIA3, GRIA4, GRIK1, GRIK2, GRIK3, GRIK4, GRIK5, GRIN1, GRIN2A, GRIN2B, GRIN2C, GRIN2D, GRIN3A, GRIN3B, GRK2, GRK3,…	FALSE
KEGG:04725	KEGG_01.03.2017	Cholinergic synapse	[-1]	[Group25]	9	8.03571	7.81917e-07	5.08246e-05	{Group25=6.1255450354991566E-18}	{Group25=9.80087205679865E-17}	[BCL2, CREB1, FOS, MAPK1, MAPK3, PIK3CG, PIK3R1, PRKCA, PRKCB]	[ACHE, ADCY1, ADCY2, ADCY3, ADCY4, ADCY5, ADCY6, ADCY7, ADCY8, ADCY9, AKT1, AKT2, AKT3, ATF4, BCL2, CACNA1A, CACNA1B, CACNA1C, CACNA1D, CACNA1F, CACNA1S, CAMK2A, CAMK2B, CAMK2D, CAMK2G, CAMK4, CHAT, CHRM1, CHRM2, CHRM3, CHRM4, CHRM5, CHRNA3, CHRNA4, CHRNA6, CHRNA7, CHRNB2, CHRNB4, CREB1, CREB3, CREB3L1, CREB3L2, CREB3L3, CREB3L4, CREB5, FOS, FYN, GNA11, GNAI1, GNAI2, GNAI3, GNAO1, GNAQ, GNB1, GNB…	FALSE
KEGG:04728	KEGG_01.03.2017	Dopaminergic synapse	[-1]	[Group25]	8	6.15385	2.44197e-05	0.00109889	{Group25=6.1255450354991566E-18}	{Group25=9.80087205679865E-17}	[ATF2, CALM1, CREB1, FOS, MAPK14, MAPK8, PRKCA, PRKCB]	[ADCY5, AKT1, AKT2, AKT3, ARNTL, ARRB2, ATF2, ATF4, ATF6B, CACNA1A, CACNA1B, CACNA1C, CACNA1D, CALM1, CALM2, CALM3, CALML3, CALML4, CALML5, CALML6, CALY, CAMK2A, CAMK2B, CAMK2D, CAMK2G, CLOCK, COMT, CREB1, CREB3, CREB3L1, CREB3L2, CREB3L3, CREB3L4, CREB5, DDC, DRD1, DRD2, DRD3, DRD4, DRD5, FOS, GNAI1, GNAI2, GNAI3, GNAL, GNAO1, GNAQ, GNAS, GNB1, GNB2, GNB3, GNB4, GNB5, GNG10, GNG11, GNG12, GNG13,…	FALSE
KEGG:04730	KEGG_01.03.2017	Long-term depression	[-1]	[Group23, Group25]	5	8.33333	0.000221449	0.00553622	{Group23=3.9857914471622045E-9, Group25=6.1255450354991566E-18}	{Group23=3.1886331577297636E-8, Group25=9.80087205679865E-17}	[MAPK1, MAPK3, PLA2G4A, PRKCA, PRKCB]	[ARAF, BRAF, CACNA1A, CRH, CRHR1, GNA11, GNA12, GNA13, GNAI1, GNAI2, GNAI3, GNAO1, GNAQ, GNAS, GNAZ, GRIA1, GRIA2, GRIA3, GRID2, GRM1, GUCY1A2, GUCY1A3, GUCY1B3, HRAS, IGF1, IGF1R, ITPR1, ITPR2, ITPR3, JMJD7-PLA2G4B, KRAS, LYN, MAP2K1, MAP2K2, MAPK1, MAPK3, NOS1, NRAS, PLA2G4A, PLA2G4B, PLA2G4C, PLA2G4D, PLA2G4E, PLA2G4F, PLCB1, PLCB2, PLCB3, PLCB4, PPP1R17, PPP2CA, PPP2CB, PPP2R1A, PPP2R1B, PRKC…	FALSE
KEGG:04750	KEGG_01.03.2017	Inflammatory mediator regulation of TRP channels	[-1]	[Group25]	9	9.27835	2.26997e-07	1.52088e-05	{Group25=6.1255450354991566E-18}	{Group25=9.80087205679865E-17}	[CALM1, IL1B, MAPK14, MAPK8, PIK3R1, PLA2G4A, PRKCA, PRKCB, PRKCE]	[ADCY1, ADCY2, ADCY3, ADCY4, ADCY5, ADCY6, ADCY7, ADCY8, ADCY9, ALOX12, ASIC1, ASIC2, ASIC3, ASIC4, ASIC5, BDKRB1, BDKRB2, CALM1, CALM2, CALM3, CALML3, CALML4, CALML5, CALML6, CAMK2A, CAMK2B, CAMK2D, CAMK2G, CYP2J2, F2RL1, GNAQ, GNAS, HRH1, HTR2A, HTR2B, HTR2C, IGF1, IL1B, IL1R1, IL1RAP, ITPR1, ITPR2, ITPR3, JMJD7-PLA2G4B, MAP2K3, MAP2K6, MAPK10, MAPK11, MAPK12, MAPK13, MAPK14, MAPK8, MAPK9, NGF,…	FALSE
KEGG:04910	KEGG_01.03.2017	Insulin signaling pathway	[-1]	[Group25]	6	4.34783	0.0017073	0.0221948	{Group25=6.1255450354991566E-18}	{Group25=9.80087205679865E-17}	[CALM1, GRB2, MAPK1, MAPK3, MAPK8, PIK3R1]	[ACACA, ACACB, AKT1, AKT2, AKT3, ARAF, BAD, BRAF, CALM1, CALM2, CALM3, CALML3, CALML4, CALML5, CALML6, CBL, CBLB, CBLC, CRK, CRKL, EIF4E, EIF4E1B, EIF4E2, EIF4EBP1, ELK1, EXOC7, FASN, FBP1, FBP2, FLOT1, FLOT2, FOXO1, G6PC, G6PC2, G6PC3, GCK, GRB2, GSK3B, GYS1, GYS2, HK1, HK2, HK3, HKDC1, HRAS, IKBKB, INPP5K, INPPL1, INS, INSR, IRS1, IRS2, IRS4, KRAS, LIPE, MAP2K1, MAP2K2, MAPK1, MAPK10, MAPK3, MA…	FALSE
KEGG:04911	KEGG_01.03.2017	Insulin secretion	[-1]	[Group15, Group25]	4	4.70588	0.00790765	0.0395383	{Group15=2.0979889133002987E-10, Group25=6.1255450354991566E-18}	{Group15=2.097988913300299E-9, Group25=9.80087205679865E-17}	[ATF2, CREB1, PRKCA, PRKCB]	[ABCC8, ADCY1, ADCY2, ADCY3, ADCY4, ADCY5, ADCY6, ADCY7, ADCY8, ADCY9, ADCYAP1, ADCYAP1R1, ATF2, ATF4, ATF6B, ATP1A1, ATP1A2, ATP1A3, ATP1A4, ATP1B1, ATP1B2, ATP1B3, ATP1B4, CACNA1C, CACNA1D, CACNA1F, CACNA1S, CAMK2A, CAMK2B, CAMK2D, CAMK2G, CCKAR, CHRM3, CREB1, CREB3, CREB3L1, CREB3L2, CREB3L3, CREB3L4, CREB5, FFAR1, FXYD2, GCG, GCK, GIP, GLP1R, GNA11, GNAQ, GNAS, GPR119, INS, ITPR3, KCNJ11, KCN…	FALSE
KEGG:04912	KEGG_01.03.2017	GnRH signaling pathway	[-1]	[Group24, Group25]	10	10.8696	9.69867e-09	8.04989e-07	{Group24=1.6198446768028198E-23, Group25=6.1255450354991566E-18}	{Group24=3.7256427566464854E-22, Group25=9.80087205679865E-17}	[CALM1, EGFR, GRB2, MAPK1, MAPK14, MAPK3, MAPK8, PLA2G4A, PRKCA, PRKCB]	[ADCY1, ADCY2, ADCY3, ADCY4, ADCY5, ADCY6, ADCY7, ADCY8, ADCY9, ATF4, CACNA1C, CACNA1D, CACNA1F, CACNA1S, CALM1, CALM2, CALM3, CALML3, CALML4, CALML5, CALML6, CAMK2A, CAMK2B, CAMK2D, CAMK2G, CDC42, CGA, EGFR, ELK1, FSHB, GNA11, GNAQ, GNAS, GNRH1, GNRH2, GNRHR, GRB2, HBEGF, HRAS, ITPR1, ITPR2, ITPR3, JMJD7-PLA2G4B, JUN, KRAS, LHB, MAP2K1, MAP2K2, MAP2K3, MAP2K4, MAP2K6, MAP2K7, MAP3K1, MAP3K2, MAP…	FALSE
KEGG:04914	KEGG_01.03.2017	Progesterone-mediated oocyte maturation	[-1]	[Group23, Group25]	5	5.20833	0.00191535	0.0210688	{Group23=3.9857914471622045E-9, Group25=6.1255450354991566E-18}	{Group23=3.1886331577297636E-8, Group25=9.80087205679865E-17}	[MAPK1, MAPK14, MAPK3, MAPK8, PIK3R1]	[ADCY1, ADCY2, ADCY3, ADCY4, ADCY5, ADCY6, ADCY7, ADCY8, ADCY9, AKT1, AKT2, AKT3, ANAPC1, ANAPC10, ANAPC11, ANAPC13, ANAPC2, ANAPC4, ANAPC5, ANAPC7, ARAF, BRAF, BUB1, CCNA1, CCNA2, CCNB1, CCNB2, CCNB3, CDC16, CDC23, CDC25A, CDC25B, CDC25C, CDC26, CDC27, CDK1, CDK2, CPEB1, CPEB2, CPEB3, CPEB4, FZR1, GNAI1, GNAI2, GNAI3, HSP90AA1, HSP90AB1, IGF1, IGF1R, INS, KRAS, MAD1L1, MAD2L1, MAD2L2, MAP2K1, MA…	FALSE
KEGG:04916	KEGG_01.03.2017	Melanogenesis	[-1]	[Group20, Group25]	6	5.94059	0.000329443	0.00724776	{Group20=3.4212824879811116E-9, Group25=6.1255450354991566E-18}	{Group20=3.0791542391830005E-8, Group25=9.80087205679865E-17}	[CALM1, CREB1, MAPK1, MAPK3, PRKCA, PRKCB]	[ADCY1, ADCY2, ADCY3, ADCY4, ADCY5, ADCY6, ADCY7, ADCY8, ADCY9, ASIP, CALM1, CALM2, CALM3, CALML3, CALML4, CALML5, CALML6, CAMK2A, CAMK2B, CAMK2D, CAMK2G, CREB1, CREB3, CREB3L1, CREB3L2, CREB3L3, CREB3L4, CREBBP, CTNNB1, DCT, DVL1, DVL2, DVL3, EDN1, EDNRB, EP300, FZD1, FZD10, FZD2, FZD3, FZD4, FZD5, FZD6, FZD7, FZD8, FZD9, GNAI1, GNAI2, GNAI3, GNAO1, GNAQ, GNAS, GSK3B, HRAS, KIT, KITLG, KRAS, LEF…	FALSE
KEGG:04917	KEGG_01.03.2017	Prolactin signaling pathway	[-1]	[Group17, Group21, Group22, Group24, Group25]	10	14.2857	6.26159e-10	5.82328e-08	{Group17=2.069840670066042E-27, Group21=3.0946781157773867E-27, Group22=1.6057462163294384E-19, Group24=1.6198446768028198E-23, Group25=6.1255450354991566E-18}	{Group17=5.381585742171709E-26, Group21=7.427227477865728E-26, Group22=3.211492432658877E-18, Group24=3.7256427566464854E-22, Group25=9.80087205679865E-17}	[FOS, GRB2, MAPK1, MAPK14, MAPK3, MAPK8, NFKB1, PIK3R1, RELA, STAT1]	[AKT1, AKT2, AKT3, CCND1, CCND2, CGA, CISH, CSN2, CYP17A1, ELF5, ESR1, ESR2, FOS, FOXO3, GALT, GCK, GRB2, GSK3B, HRAS, INS, IRF1, JAK2, KRAS, LHB, LHCGR, MAP2K1, MAP2K2, MAPK1, MAPK10, MAPK11, MAPK12, MAPK13, MAPK14, MAPK3, MAPK8, MAPK9, NFKB1, NRAS, PIK3CA, PIK3CB, PIK3CD, PIK3R1, PIK3R2, PIK3R3, PRL, PRLR, RAF1, RELA, SHC1, SHC2, SHC3, SHC4, SLC2A2, SOCS1, SOCS2, SOCS3, SOCS4, SOCS5, SOCS6, SOC…	FALSE
KEGG:04918	KEGG_01.03.2017	Thyroid hormone synthesis	[-1]	[Group15, Group25]	5	6.75676	0.000590798	0.0112252	{Group15=2.0979889133002987E-10, Group25=6.1255450354991566E-18}	{Group15=2.097988913300299E-9, Group25=9.80087205679865E-17}	[ATF2, CREB1, PRKCA, PRKCB, TTR]	[ADCY1, ADCY2, ADCY3, ADCY4, ADCY5, ADCY6, ADCY7, ADCY8, ADCY9, ALB, ASGR1, ASGR2, ATF2, ATF4, ATF6B, ATP1A1, ATP1A2, ATP1A3, ATP1A4, ATP1B1, ATP1B2, ATP1B3, ATP1B4, CANX, CGA, CREB1, CREB3, CREB3L1, CREB3L2, CREB3L3, CREB3L4, CREB5, DUOX2, DUOXA2, FXYD2, GNAQ, GNAS, GPX1, GPX2, GPX3, GPX5, GPX6, GPX7, GPX8, GSR, HSP90B1, HSPA5, ITPR1, ITPR2, ITPR3, IYD, LRP2, PAX8, PDIA4, PLCB1, PLCB2, PLCB3, PL…	FALSE
KEGG:04919	KEGG_01.03.2017	Thyroid hormone signaling pathway	[-1]	[Group25]	7	6.03448	9.24348e-05	0.00323522	{Group25=6.1255450354991566E-18}	{Group25=9.80087205679865E-17}	[MAPK1, MAPK3, PIK3R1, PRKCA, PRKCB, STAT1, TP53]	[ACTB, ACTG1, AKT1, AKT2, AKT3, ATP1A1, ATP1A2, ATP1A3, ATP1A4, ATP1B1, ATP1B2, ATP1B3, ATP1B4, ATP2A2, BAD, BMP4, CASP9, CCND1, CREBBP, CTNNB1, DIO1, DIO2, DIO3, EP300, ESR1, FOXO1, FXYD2, GATA4, GSK3B, HDAC1, HDAC2, HDAC3, HIF1A, HRAS, ITGAV, ITGB3, KAT2A, KAT2B, KRAS, MAP2K1, MAP2K2, MAPK1, MAPK3, MDM2, MED1, MED12, MED12L, MED13, MED13L, MED14, MED16, MED17, MED24, MED27, MED30, MED4, MTOR, M…	FALSE
KEGG:04920	KEGG_01.03.2017	Adipocytokine signaling pathway	[-1]	[Group13, Group15, Group25]	4	5.7971	0.00377226	0.0301781	{Group13=5.9735011611036426E-12, Group15=2.0979889133002987E-10, Group25=6.1255450354991566E-18}	{Group13=6.570851277214007E-11, Group15=2.097988913300299E-9, Group25=9.80087205679865E-17}	[MAPK8, NFKB1, RELA, TNF]	[ACACB, ACSBG1, ACSBG2, ACSL1, ACSL3, ACSL4, ACSL5, ACSL6, ADIPOQ, ADIPOR1, ADIPOR2, AGRP, AKT1, AKT2, AKT3, CAMKK2, CD36, CHUK, CPT1A, CPT1B, CPT1C, G6PC, G6PC2, G6PC3, IKBKB, IKBKG, IRS1, IRS2, IRS4, JAK2, LEP, LEPR, MAPK10, MAPK8, MAPK9, MTOR, NFKB1, NFKBIA, NFKBIB, NFKBIE, NPY, PCK1, PCK2, POMC, PPARA, PPARGC1A, PRKAA1, PRKAA2, PRKAB1, PRKAB2, PRKAG1, PRKAG2, PRKAG3, PRKCQ, PTPN11, RELA, RXRA…	FALSE
KEGG:04923	KEGG_01.03.2017	Regulation of lipolysis in adipocytes	[-1]	[Group04]	3	5.55556	0.013655	0.040965	{Group04=8.768999845808076E-5}	{Group04=4.384499922904038E-4}	[PIK3R1, PTGS1, PTGS2]	[ABHD5, ADCY1, ADCY2, ADCY3, ADCY4, ADCY5, ADCY6, ADCY7, ADCY8, ADCY9, ADORA1, ADRB1, ADRB2, ADRB3, AKT1, AKT2, AKT3, AQP7, CGA, FABP4, GNAI1, GNAI2, GNAI3, GNAS, INS, INSR, IRS1, IRS2, IRS4, LIPE, MGLL, NPR1, NPY, NPY1R, PDE3B, PIK3CA, PIK3CB, PIK3CD, PIK3R1, PIK3R2, PIK3R3, PLA2G16, PLIN1, PNPLA2, PRKACA, PRKACB, PRKACG, PRKG1, PRKG2, PTGER3, PTGS1, PTGS2, TSHB, TSHR]	FALSE
KEGG:04924	KEGG_01.03.2017	Renin secretion	[-1]	[Group03]	4	6.15385	0.00303752	0.0273377	{Group03=2.986200378665797E-4}	{Group03=0.0011944801514663188}	[ACE, CALM1, CREB1, CTSB]	[ACE, ADCY5, ADCY6, ADCYAP1, ADCYAP1R1, ADORA1, ADRB1, ADRB2, ADRB3, AGT, AGTR1, AQP1, CACNA1C, CACNA1D, CACNA1F, CACNA1S, CALM1, CALM2, CALM3, CALML3, CALML4, CALML5, CALML6, CLCA1, CLCA2, CLCA4, CREB1, CTSB, EDNRA, GNAI1, GNAI2, GNAI3, GNAQ, GNAS, GUCY1A2, GUCY1A3, GUCY1B3, ITPR1, ITPR2, ITPR3, KCNJ2, KCNMA1, NPR1, ORAI1, PDE1A, PDE1B, PDE1C, PDE3A, PDE3B, PLCB1, PLCB2, PLCB3, PLCB4, PPP3CA, PP…	FALSE
KEGG:04925	KEGG_01.03.2017	Aldosterone synthesis and secretion	[-1]	[Group20, Group25]	6	7.31707	0.000104514	0.00355348	{Group20=3.4212824879811116E-9, Group25=6.1255450354991566E-18}	{Group20=3.0791542391830005E-8, Group25=9.80087205679865E-17}	[ATF2, CALM1, CREB1, PRKCA, PRKCB, PRKCE]	[ADCY1, ADCY2, ADCY3, ADCY4, ADCY5, ADCY6, ADCY7, ADCY8, ADCY9, AGTR1, ATF1, ATF2, ATF4, ATF6B, CACNA1C, CACNA1D, CACNA1F, CACNA1G, CACNA1H, CACNA1I, CACNA1S, CALM1, CALM2, CALM3, CALML3, CALML4, CALML5, CALML6, CAMK1, CAMK1D, CAMK1G, CAMK2A, CAMK2B, CAMK2D, CAMK2G, CAMK4, CREB1, CREB3, CREB3L1, CREB3L2, CREB3L3, CREB3L4, CREB5, CYP11A1, CYP11B2, CYP21A2, DAGLA, DAGLB, GNA11, GNAQ, GNAS, HSD3B1, …	FALSE
KEGG:04930	KEGG_01.03.2017	Type II diabetes mellitus	[-1]	[Group13, Group18, Group25]	6	13.0435	3.63397e-06	0.000199868	{Group13=5.9735011611036426E-12, Group18=1.7234766993344764E-7, Group25=6.1255450354991566E-18}	{Group13=6.570851277214007E-11, Group18=1.0340860196006859E-6, Group25=9.80087205679865E-17}	[MAPK1, MAPK3, MAPK8, PIK3R1, PRKCE, TNF]	[ABCC8, ADIPOQ, CACNA1A, CACNA1B, CACNA1C, CACNA1D, CACNA1E, CACNA1G, GCK, HK1, HK2, HK3, HKDC1, IKBKB, INS, INSR, IRS1, IRS2, IRS4, KCNJ11, MAFA, MAPK1, MAPK10, MAPK3, MAPK8, MAPK9, MTOR, PDX1, PIK3CA, PIK3CB, PIK3CD, PIK3R1, PIK3R2, PIK3R3, PKLR, PKM, PRKCD, PRKCE, PRKCZ, SLC2A2, SLC2A4, SOCS1, SOCS2, SOCS3, SOCS4, TNF]	FALSE
KEGG:04931	KEGG_01.03.2017	Insulin resistance	[-1]	[Group13, Group25]	10	9.3458	4.2372e-08	3.09316e-06	{Group13=5.9735011611036426E-12, Group25=6.1255450354991566E-18}	{Group13=6.570851277214007E-11, Group25=9.80087205679865E-17}	[CREB1, IL6, MAPK8, NFKB1, NOS3, PIK3R1, PRKCB, PRKCE, RELA, TNF]	[ACACB, AKT1, AKT2, AKT3, CD36, CPT1A, CPT1B, CREB1, CREB3, CREB3L1, CREB3L2, CREB3L3, CREB3L4, CREB5, CRTC2, FOXO1, G6PC, G6PC2, G6PC3, GFPT1, GFPT2, GSK3B, GYS1, GYS2, IKBKB, IL6, INS, INSR, IRS1, IRS2, MAPK10, MAPK8, MAPK9, MGEA5, MLX, MLXIP, MLXIPL, MTOR, NFKB1, NFKBIA, NOS3, NR1H2, NR1H3, OGT, PCK1, PCK2, PDPK1, PIK3CA, PIK3CB, PIK3CD, PIK3R1, PIK3R2, PIK3R3, PPARA, PPARGC1A, PPARGC1B, PPP1C…	FALSE
KEGG:04932	KEGG_01.03.2017	Non-alcoholic fatty liver disease (NAFLD)	[-1]	[Group13, Group14, Group19, Group22, Group25]	12	8.05369	9.00428e-09	7.56359e-07	{Group13=5.9735011611036426E-12, Group14=3.803797610461494E-18, Group19=3.087782314701002E-27, Group22=1.6057462163294384E-19, Group25=6.1255450354991566E-18}	{Group13=6.570851277214007E-11, Group14=6.46645593778454E-17, Group19=7.719455786752505E-26, Group22=3.211492432658877E-18, Group25=9.80087205679865E-17}	[BAX, CASP3, CASP8, CXCL8, IL1A, IL1B, IL6, MAPK8, NFKB1, PIK3R1, RELA, TNF]	[ADIPOQ, ADIPOR1, ADIPOR2, AKT1, AKT2, AKT3, ATF4, BAX, BCL2L11, BID, CASP3, CASP7, CASP8, CDC42, CEBPA, COX1, COX2, COX3, COX4I1, COX4I2, COX5A, COX5B, COX6A1, COX6A2, COX6B1, COX6B2, COX6C, COX7A1, COX7A2, COX7A2L, COX7B, COX7B2, COX7C, COX8A, COX8C, CXCL8, CYC1, CYCS, CYP2E1, CYTB, DDIT3, EIF2AK3, EIF2S1, ERN1, FAS, FASLG, GSK3A, GSK3B, IKBKB, IL1A, IL1B, IL6, IL6R, INS, INSR, IRS1, IRS2, ITCH…	FALSE
KEGG:04940	KEGG_01.03.2017	Type I diabetes mellitus	[-1]	[Group25]	5	11.6279	4.4098e-05	0.00171982	{Group25=6.1255450354991566E-18}	{Group25=9.80087205679865E-17}	[IFNG, IL1A, IL1B, IL2, TNF]	[CD28, CD80, CD86, CPE, FAS, FASLG, GAD1, GAD2, GZMB, HLA-A, HLA-B, HLA-C, HLA-DMA, HLA-DMB, HLA-DOA, HLA-DOB, HLA-DPA1, HLA-DPB1, HLA-DQA1, HLA-DQA2, HLA-DQB1, HLA-DRA, HLA-DRB1, HLA-DRB3, HLA-DRB4, HLA-DRB5, HLA-E, HLA-F, HLA-G, HSPD1, ICA1, IFNG, IL12A, IL12B, IL1A, IL1B, IL2, INS, LTA, PRF1, PTPRN, PTPRN2, TNF]	FALSE
KEGG:04960	KEGG_01.03.2017	Aldosterone-regulated sodium reabsorption	[-1]	[Group23, Group25]	5	13.5135	2.08493e-05	0.000959067	{Group23=3.9857914471622045E-9, Group25=6.1255450354991566E-18}	{Group23=3.1886331577297636E-8, Group25=9.80087205679865E-17}	[MAPK1, MAPK3, PIK3R1, PRKCA, PRKCB]	[ATP1A1, ATP1A2, ATP1A3, ATP1A4, ATP1B1, ATP1B2, ATP1B3, ATP1B4, FXYD2, FXYD4, HSD11B2, IGF1, INS, INSR, IRS1, KCNJ1, KRAS, MAPK1, MAPK3, NEDD4L, NR3C2, PDPK1, PIK3CA, PIK3CB, PIK3CD, PIK3R1, PIK3R2, PIK3R3, PRKCA, PRKCB, PRKCG, SCNN1A, SCNN1B, SCNN1G, SFN, SGK1, SLC9A3R2]	FALSE
KEGG:04971	KEGG_01.03.2017	Gastric acid secretion	[-1]	[Group25]	3	4	0.0323978	0.0323978	{Group25=6.1255450354991566E-18}	{Group25=9.80087205679865E-17}	[CALM1, PRKCA, PRKCB]	[ACTB, ADCY1, ADCY2, ADCY3, ADCY4, ADCY5, ADCY6, ADCY7, ADCY8, ADCY9, ATP1A1, ATP1A2, ATP1A3, ATP1A4, ATP1B1, ATP1B2, ATP1B3, ATP1B4, ATP4A, ATP4B, CA2, CALM1, CALM2, CALM3, CALML3, CALML4, CALML5, CALML6, CAMK2A, CAMK2B, CAMK2D, CAMK2G, CCKBR, CFTR, CHRM3, EZR, GAST, GNAI1, GNAI2, GNAI3, GNAQ, GNAS, HRH2, ITPR1, ITPR2, ITPR3, KCNE2, KCNJ1, KCNJ10, KCNJ15, KCNJ16, KCNJ2, KCNK10, KCNK2, KCNQ1, MYL…	FALSE
KEGG:05010	KEGG_01.03.2017	Alzheimer's disease	[-1]	[Group06, Group18, Group25]	8	4.67836	0.00017082	0.00478295	{Group06=2.637389460959518E-13, Group18=1.7234766993344764E-7, Group25=6.1255450354991566E-18}	{Group06=3.4286062992473736E-12, Group18=1.0340860196006859E-6, Group25=9.80087205679865E-17}	[APOE, CALM1, CASP3, CASP8, IL1B, MAPK1, MAPK3, TNF]	[ADAM10, ADAM17, APAF1, APBB1, APH1A, APH1B, APOE, APP, ATF6, ATP2A1, ATP2A2, ATP2A3, ATP5A1, ATP5B, ATP5C1, ATP5D, ATP5E, ATP5F1, ATP5G1, ATP5G2, ATP5G3, ATP5H, ATP5J, ATP5O, ATP6, ATP8, BACE1, BACE2, BAD, BID, CACNA1C, CACNA1D, CACNA1F, CACNA1S, CALM1, CALM2, CALM3, CALML3, CALML4, CALML5, CALML6, CAPN1, CAPN2, CASP12, CASP3, CASP7, CASP8, CASP9, CDK5, CDK5R1, COX1, COX2, COX3, COX4I1, COX4I2, …	FALSE
KEGG:05014	KEGG_01.03.2017	Amyotrophic lateral sclerosis (ALS)	[-1]	[Group11]	9	17.6471	6.76517e-10	6.15631e-08	{Group11=3.365147532546613E-14}	{Group11=4.711206545565258E-13}	[BAX, BCL2, BCL2L1, CASP3, CAT, MAPK14, SOD1, TNF, TP53]	[ALS2, APAF1, BAD, BAX, BCL2, BCL2L1, BID, CASP1, CASP12, CASP3, CASP9, CAT, CCS, CYCS, DAXX, DERL1, GPX1, GRIA1, GRIA2, GRIN1, GRIN2A, GRIN2B, GRIN2C, GRIN2D, MAP2K3, MAP2K6, MAP3K5, MAPK11, MAPK12, MAPK13, MAPK14, NEFH, NEFL, NEFM, NOS1, PPP3CA, PPP3CB, PPP3CC, PPP3R1, PPP3R2, PRPH, RAB5A, RAC1, SLC1A2, SOD1, TNF, TNFRSF1A, TNFRSF1B, TOMM40, TOMM40L, TP53]	FALSE
KEGG:05020	KEGG_01.03.2017	Prion diseases	[-1]	[Group25]	7	20	2.41407e-08	1.85883e-06	{Group25=6.1255450354991566E-18}	{Group25=9.80087205679865E-17}	[BAX, IL1A, IL1B, IL6, MAPK1, MAPK3, SOD1]	[BAX, C1QA, C1QB, C1QC, C5, C6, C7, C8A, C8B, C8G, C9, CASP12, CCL5, EGR1, ELK1, FYN, HSPA1A, HSPA5, IL1A, IL1B, IL6, LAMC1, MAP2K1, MAP2K2, MAPK1, MAPK3, NCAM1, NCAM2, NOTCH1, PRKACA, PRKACB, PRKACG, PRNP, SOD1, STIP1]	FALSE
KEGG:05030	KEGG_01.03.2017	Cocaine addiction	[-1]	[Group07, Group15, Group25]	4	8.16327	0.00106259	0.0170015	{Group07=1.875631249072848E-15, Group15=2.0979889133002987E-10, Group25=6.1255450354991566E-18}	{Group07=2.813446873609272E-14, Group15=2.097988913300299E-9, Group25=9.80087205679865E-17}	[ATF2, CREB1, NFKB1, RELA]	[ADCY5, ATF2, ATF4, ATF6B, BDNF, CDK5, CDK5R1, CREB1, CREB3, CREB3L1, CREB3L2, CREB3L3, CREB3L4, CREB5, DDC, DLG4, DRD1, DRD2, FOSB, GNAI1, GNAI2, GNAI3, GNAS, GPSM1, GRIA2, GRIN1, GRIN2A, GRIN2B, GRIN2C, GRIN2D, GRIN3A, GRIN3B, GRM2, GRM3, JUN, MAOA, MAOB, NFKB1, PDYN, PPP1R1B, PRKACA, PRKACB, PRKACG, RELA, RGS9, SLC18A1, SLC18A2, SLC6A3, TH]	FALSE
KEGG:05031	KEGG_01.03.2017	Amphetamine addiction	[-1]	[Group25]	6	8.82353	3.61742e-05	0.00151932	{Group25=6.1255450354991566E-18}	{Group25=9.80087205679865E-17}	[ATF2, CALM1, CREB1, FOS, PRKCA, PRKCB]	[ADCY5, ARC, ATF2, ATF4, ATF6B, CACNA1C, CACNA1D, CALM1, CALM2, CALM3, CALML3, CALML4, CALML5, CALML6, CAMK2A, CAMK2B, CAMK2D, CAMK2G, CAMK4, CREB1, CREB3, CREB3L1, CREB3L2, CREB3L3, CREB3L4, CREB5, DDC, DRD1, FOS, FOSB, GNAS, GRIA1, GRIA2, GRIA3, GRIA4, GRIN1, GRIN2A, GRIN2B, GRIN2C, GRIN2D, GRIN3A, GRIN3B, HDAC1, JUN, MAOA, MAOB, PDYN, PPP1CA, PPP1CB, PPP1CC, PPP1R1B, PPP3CA, PPP3CB, PPP3CC, PP…	FALSE
KEGG:05120	KEGG_01.03.2017	Epithelial cell signaling in Helicobacter pylori infection	[-1]	[Group25]	7	10.2941	2.73228e-06	0.000161205	{Group25=6.1255450354991566E-18}	{Group25=9.80087205679865E-17}	[CASP3, CXCL8, EGFR, MAPK14, MAPK8, NFKB1, RELA]	[ADAM10, ADAM17, ATP6AP1, ATP6V0A1, ATP6V0A2, ATP6V0A4, ATP6V0B, ATP6V0C, ATP6V0D1, ATP6V0D2, ATP6V0E1, ATP6V0E2, ATP6V1A, ATP6V1B1, ATP6V1B2, ATP6V1C1, ATP6V1C2, ATP6V1D, ATP6V1E1, ATP6V1E2, ATP6V1F, ATP6V1G1, ATP6V1G2, ATP6V1G3, ATP6V1H, CASP3, CCL5, CDC42, CHUK, CSK, CXCL1, CXCL8, CXCR1, CXCR2, EGFR, F11R, GIT1, HBEGF, IGSF5, IKBKB, IKBKG, JAM2, JAM3, JUN, LYN, MAP2K4, MAP3K14, MAPK10, MAPK11,…	FALSE
KEGG:05131	KEGG_01.03.2017	Shigellosis	[-1]	[Group17, Group25]	7	10.7692	2.00578e-06	0.000122353	{Group17=2.069840670066042E-27, Group25=6.1255450354991566E-18}	{Group17=5.381585742171709E-26, Group25=9.80087205679865E-17}	[CXCL8, MAPK1, MAPK14, MAPK3, MAPK8, NFKB1, RELA]	[ABL1, ACTB, ACTG1, ARPC1A, ARPC1B, ARPC2, ARPC3, ARPC4, ARPC5, ARPC5L, ATG5, BTRC, CD44, CDC42, CHUK, CRK, CRKL, CTTN, CXCL8, DIAPH1, DOCK1, ELMO1, ELMO2, ELMO3, FBXW11, HCLS1, IKBKB, IKBKG, ITGA5, ITGB1, MAD2L2, MAPK1, MAPK10, MAPK11, MAPK12, MAPK13, MAPK14, MAPK3, MAPK8, MAPK9, NFKB1, NFKBIA, NFKBIB, NOD1, NOD2, PFN1, PFN2, PFN3, PFN4, RAC1, RELA, RHOG, RIPK2, ROCK1, ROCK2, SRC, U2AF1, U2AF1L4…	FALSE
KEGG:05132	KEGG_01.03.2017	Salmonella infection	[-1]	[Group25]	15	17.4419	8.59714e-16	1.03166e-13	{Group25=6.1255450354991566E-18}	{Group25=9.80087205679865E-17}	[CSF2, CXCL2, CXCL8, FOS, IFNG, IL1A, IL1B, IL6, MAPK1, MAPK14, MAPK3, MAPK8, NFKB1, NOS2, RELA]	[ACTB, ACTG1, ARPC1A, ARPC1B, ARPC2, ARPC3, ARPC4, ARPC5, ARPC5L, CASP1, CCL3, CCL3L1, CCL3L3, CCL4, CCL4L1, CCL4L2, CD14, CDC42, CSF2, CXCL1, CXCL2, CXCL3, CXCL8, DYNC1H1, DYNC1I1, DYNC1I2, DYNC1LI1, DYNC1LI2, DYNC2H1, FLNA, FLNB, FLNC, FOS, IFNG, IFNGR1, IFNGR2, IL18, IL1A, IL1B, IL6, JUN, KLC1, KLC2, KLC3, KLC4, LBP, MAPK1, MAPK10, MAPK11, MAPK12, MAPK13, MAPK14, MAPK3, MAPK8, MAPK9, MYD88, MY…	FALSE
KEGG:05134	KEGG_01.03.2017	Legionellosis	[-1]	[Group14, Group25]	9	16.3636	1.37318e-09	1.2084e-07	{Group14=3.803797610461494E-18, Group25=6.1255450354991566E-18}	{Group14=6.46645593778454E-17, Group25=9.80087205679865E-17}	[CASP3, CASP8, CXCL2, CXCL8, IL1B, IL6, NFKB1, RELA, TNF]	[APAF1, ARF1, BCL2L13, BNIP3, C3, CASP1, CASP3, CASP7, CASP8, CASP9, CD14, CLK1, CR1, CXCL1, CXCL2, CXCL3, CXCL8, CYCS, EEF1A1, EEF1A2, EEF1G, HBS1L, HSF1, HSPA1A, HSPA1B, HSPA1L, HSPA2, HSPA6, HSPA8, HSPD1, IL12A, IL12B, IL18, IL1B, IL6, ITGAM, ITGB2, MYD88, NAIP, NFKB1, NFKB2, NFKBIA, NLRC4, PYCARD, RAB1A, RAB1B, RELA, SAR1A, SAR1B, SEC22B, TLR2, TLR4, TLR5, TNF, VCP]	FALSE
KEGG:05143	KEGG_01.03.2017	African trypanosomiasis	[-1]	[Group14, Group25]	8	22.8571	7.10648e-10	6.39584e-08	{Group14=3.803797610461494E-18, Group25=6.1255450354991566E-18}	{Group14=6.46645593778454E-17, Group25=9.80087205679865E-17}	[ICAM1, IFNG, IL10, IL1B, IL6, PRKCA, PRKCB, TNF]	[APOA1, APOL1, F2RL1, FAS, FASLG, GNAQ, HBA1, HBA2, HBB, HPR, ICAM1, IDO1, IDO2, IFNG, IL10, IL12A, IL12B, IL18, IL1B, IL6, LAMA4, LOC102723407, MYD88, PLCB1, PLCB2, PLCB3, PLCB4, PRKCA, PRKCB, PRKCG, SELE, THOP1, TLR9, TNF, VCAM1]	FALSE
KEGG:05144	KEGG_01.03.2017	Malaria	[-1]	[Group25]	10	20.4082	1.5108e-11	1.55613e-09	{Group25=6.1255450354991566E-18}	{Group25=9.80087205679865E-17}	[CCL2, CD40LG, CD81, CXCL8, ICAM1, IFNG, IL10, IL1B, IL6, TNF]	[ACKR1, CCL2, CD36, CD40, CD40LG, CD81, COMP, CR1, CSF3, CXCL8, GYPA, GYPB, GYPC, HBA1, HBA2, HBB, HGF, ICAM1, IFNG, IL10, IL12A, IL18, IL1B, IL6, ITGAL, ITGB2, KLRB1, KLRC4-KLRK1, KLRK1, LRP1, MET, MYD88, PECAM1, SDC1, SDC2, SELE, SELP, TGFB1, TGFB2, TGFB3, THBS1, THBS2, THBS3, THBS4, TLR2, TLR4, TLR9, TNF, VCAM1]	FALSE
KEGG:05146	KEGG_01.03.2017	Amoebiasis	[-1]	[Group14, Group25]	15	15.625	4.82002e-15	5.68763e-13	{Group14=3.803797610461494E-18, Group25=6.1255450354991566E-18}	{Group14=6.46645593778454E-17, Group25=9.80087205679865E-17}	[CASP3, CSF2, CXCL8, HSPB1, IFNG, IL10, IL1B, IL6, NFKB1, NOS2, PIK3R1, PRKCA, PRKCB, RELA, TNF]	[ACTN1, ACTN4, ADCY1, ARG1, ARG2, C8A, C8B, C8G, C9, CASP3, CD14, CD1D, COL1A1, COL1A2, COL3A1, COL4A1, COL4A2, COL4A3, COL4A4, COL4A5, COL4A6, CSF2, CTSG, CXCL1, CXCL8, FN1, GNA11, GNA14, GNA15, GNAL, GNAQ, GNAS, HSPB1, IFNG, IL10, IL12A, IL12B, IL1B, IL1R1, IL1R2, IL6, ITGAM, ITGB2, LAMA1, LAMA2, LAMA3, LAMA4, LAMA5, LAMB1, LAMB2, LAMB3, LAMB4, LAMC1, LAMC2, LAMC3, LOC102723407, MUC2, NFKB1, NO…	FALSE
KEGG:05152	KEGG_01.03.2017	Tuberculosis	[-1]	[Group17, Group19, Group25]	20	11.1732	5.98813e-17	7.42528e-15	{Group17=2.069840670066042E-27, Group19=3.087782314701002E-27, Group25=6.1255450354991566E-18}	{Group17=5.381585742171709E-26, Group19=7.719455786752505E-26, Group25=9.80087205679865E-17}	[BAX, BCL2, CALM1, CASP3, CASP8, CREB1, IFNG, IL10, IL1A, IL1B, IL6, MAPK1, MAPK14, MAPK3, MAPK8, NFKB1, NOS2, RELA, STAT1, TNF]	[AKT1, AKT2, AKT3, APAF1, ARHGEF12, ATP6AP1, ATP6V0A1, ATP6V0A2, ATP6V0A4, ATP6V0B, ATP6V0C, ATP6V0D1, ATP6V0D2, ATP6V1H, BAD, BAX, BCL10, BCL2, BID, C3, CALM1, CALM2, CALM3, CALML3, CALML4, CALML5, CALML6, CAMK2A, CAMK2B, CAMK2D, CAMK2G, CAMP, CARD9, CASP10, CASP3, CASP8, CASP9, CD14, CD209, CD74, CEBPB, CEBPG, CIITA, CLEC4E, CLEC4M, CLEC7A, CORO1A, CR1, CREB1, CREBBP, CTSD, CTSS, CYCS, CYP27B1,…	FALSE
KEGG:05160	KEGG_01.03.2017	Hepatitis C	[-1]	[Group24, Group25]	14	10.687	9.42756e-12	9.99321e-10	{Group24=1.6198446768028198E-23, Group25=6.1255450354991566E-18}	{Group24=3.7256427566464854E-22, Group25=9.80087205679865E-17}	[CD81, CXCL8, EGFR, GRB2, MAPK1, MAPK14, MAPK3, MAPK8, NFKB1, PIK3R1, RELA, STAT1, TNF, TP53]	[AKT1, AKT2, AKT3, ARAF, BAD, BRAF, CD81, CDKN1A, CHUK, CLDN1, CLDN10, CLDN11, CLDN14, CLDN15, CLDN16, CLDN17, CLDN18, CLDN19, CLDN2, CLDN20, CLDN22, CLDN23, CLDN24, CLDN25, CLDN3, CLDN4, CLDN5, CLDN6, CLDN7, CLDN8, CLDN9, CXCL8, DDX58, EGF, EGFR, EIF2AK1, EIF2AK2, EIF2AK3, EIF2AK4, EIF2S1, EIF3E, GRB2, GSK3B, HRAS, IFIT1, IFIT1B, IFNA1, IFNA10, IFNA13, IFNA14, IFNA16, IFNA17, IFNA2, IFNA21, IFNA…	FALSE
KEGG:05162	KEGG_01.03.2017	Measles	[-1]	[Group25]	12	8.95522	2.66323e-09	2.31701e-07	{Group25=6.1255450354991566E-18}	{Group25=9.80087205679865E-17}	[CDK4, IFNG, IL1A, IL1B, IL2, IL4, IL6, NFKB1, PIK3R1, RELA, STAT1, TP53]	[ADAR, AKT1, AKT2, AKT3, BBC3, CBLB, CCND1, CCND2, CCND3, CCNE1, CCNE2, CD209, CD28, CD3D, CD3E, CD3G, CD46, CDK2, CDK4, CDK6, CDKN1B, CHUK, CLEC4M, CSNK2A1, CSNK2A2, CSNK2A3, CSNK2B, DDX58, DOK1, EIF2AK1, EIF2AK2, EIF2AK3, EIF2AK4, EIF2S1, EIF3H, FAS, FASLG, FCGR2B, FYN, GSK3B, HSPA1A, HSPA1B, HSPA1L, HSPA2, HSPA6, HSPA8, IFIH1, IFNA1, IFNA10, IFNA13, IFNA14, IFNA16, IFNA17, IFNA2, IFNA21, IFNA4…	FALSE
KEGG:05168	KEGG_01.03.2017	Herpes simplex infection	[-1]	[Group16, Group25]	13	7.02703	1.06346e-08	8.72039e-07	{Group16=6.693331547348122E-20, Group25=6.1255450354991566E-18}	{Group16=1.4055996249431058E-18, Group25=9.80087205679865E-17}	[CASP3, CASP8, CCL2, FOS, IFNG, IL1B, IL6, MAPK8, NFKB1, RELA, STAT1, TNF, TP53]	[ALYREF, ARNTL, C1QBP, C3, C5, CASP3, CASP8, CCL2, CCL5, CD74, CDC34, CDK1, CDK2, CFP, CHUK, CLOCK, CREBBP, CSNK2A1, CSNK2A2, CSNK2A3, CSNK2B, CUL1, CYCS, DAXX, DDX58, EEF1D, EIF2AK1, EIF2AK2, EIF2AK3, EIF2AK4, EIF2S1, EP300, FADD, FAS, FASLG, FOS, GLTSCR2, GTF2I, GTF2IRD1, HCFC1, HCFC2, HLA-A, HLA-B, HLA-C, HLA-DMA, HLA-DMB, HLA-DOA, HLA-DOB, HLA-DPA1, HLA-DPB1, HLA-DQA1, HLA-DQA2, HLA-DQB1, HLA…	FALSE
KEGG:05169	KEGG_01.03.2017	Epstein-Barr virus infection	[-1]	[Group05, Group10, Group16, Group25]	13	6.43564	3.06604e-08	2.26887e-06	{Group05=2.873685862761464E-18, Group10=2.338707280735993E-19, Group16=6.693331547348122E-20, Group25=6.1255450354991566E-18}	{Group05=5.172634552970635E-17, Group10=4.4435438333983866E-18, Group16=1.4055996249431058E-18, Group25=9.80087205679865E-17}	[ATF2, BCL2, HSPB1, ICAM1, IFNG, IL10, MAPK14, MAPK8, NFKB1, PIK3R1, RB1, RELA, TP53]	[AKAP8L, AKT1, AKT2, AKT3, ATF2, BCL2, CCNA1, CCNA2, CD19, CD38, CD40, CD44, CD58, CDK1, CDK2, CDKN1A, CDKN1B, CHUK, CR2, CREBBP, CSNK2A1, CSNK2A2, CSNK2A3, CSNK2B, DDX58, EIF2AK1, EIF2AK2, EIF2AK3, EIF2AK4, ENTPD1, ENTPD3, ENTPD8, EP300, FCER2, FGR, GSK3B, GTF2B, GTF2E1, GTF2E2, HDAC1, HDAC2, HDAC4, HDAC5, HLA-A, HLA-B, HLA-C, HLA-DPA1, HLA-DPB1, HLA-DQA1, HLA-DQA2, HLA-DQB1, HLA-DRA, HLA-DRB1, …	FALSE
KEGG:05202	KEGG_01.03.2017	Transcriptional misregulation in cancer	[-1]	[Group25]	8	4.44444	0.000243042	0.00583301	{Group25=6.1255450354991566E-18}	{Group25=9.80087205679865E-17}	[BCL2L1, CSF2, CXCL8, IL6, NFKB1, PPARG, RELA, TP53]	[AFF1, ARNT2, ASPSCR1, ATF1, ATM, BAIAP3, BCL2A1, BCL2L1, BCL6, BIRC3, BMI1, BMP2K, CCNA1, CCND2, CCNT1, CCNT2, CCR7, CD14, CD40, CD86, CDK14, CDK9, CDKN1A, CDKN1B, CDKN2C, CEBPA, CEBPB, CEBPE, COMMD3-BMI1, CSF1R, CSF2, CXCL8, DDIT3, DDX5, DEFA3, DOT1L, DUSP6, ELANE, ELK4, ERG, ETV1, ETV4, ETV5, ETV6, ETV7, EWSR1, EYA1, FCGR1A, FEV, FLI1, FLT1, FLT3, FOXO1, FUS, FUT8, GOLPH3, GOLPH3L, GRIA3, GZMB…	FALSE
KEGG:05203	KEGG_01.03.2017	Viral carcinogenesis	[-1]	[Group07, Group22, Group25]	15	7.46269	2.82021e-10	2.6792e-08	{Group07=1.875631249072848E-15, Group22=1.6057462163294384E-19, Group25=6.1255450354991566E-18}	{Group07=2.813446873609272E-14, Group22=3.211492432658877E-18, Group25=9.80087205679865E-17}	[ATF2, BAX, CASP3, CASP8, CCR3, CDK4, CREB1, GRB2, MAPK1, MAPK3, NFKB1, PIK3R1, RB1, RELA, TP53]	[ACTN1, ACTN4, ATF2, ATF4, ATF6B, ATP6V0D1, ATP6V0D2, BAD, BAK1, BAX, C3, CASP3, CASP8, CCNA1, CCNA2, CCND1, CCND2, CCND3, CCNE1, CCNE2, CCR3, CCR4, CCR5, CCR8, CDC20, CDC42, CDK1, CDK2, CDK4, CDK6, CDKN1A, CDKN1B, CDKN2A, CDKN2B, CHD4, CHEK1, CREB1, CREB3, CREB3L1, CREB3L2, CREB3L3, CREB3L4, CREB5, CREBBP, DDB1, DDX3X, DLG1, DNAJA3, EGR2, EGR3, EIF2AK2, EP300, GRB2, GSN, GTF2A1, GTF2A1L, GTF2A2,…	FALSE
KEGG:05205	KEGG_01.03.2017	Proteoglycans in cancer	[-1]	[Group24, Group25]	11	5.41872	2.21799e-06	0.00013308	{Group24=1.6198446768028198E-23, Group25=6.1255450354991566E-18}	{Group24=3.7256427566464854E-22, Group25=9.80087205679865E-17}	[CASP3, EGFR, GRB2, MAPK1, MAPK14, MAPK3, PIK3R1, PRKCA, PRKCB, TNF, TP53]	[ACTB, ACTG1, AKT1, AKT2, AKT3, ANK1, ANK2, ANK3, ARAF, ARHGEF1, ARHGEF12, BRAF, CAMK2A, CAMK2B, CAMK2D, CAMK2G, CASP3, CAV1, CAV2, CAV3, CBL, CBLB, CBLC, CCND1, CD44, CD63, CDC42, CDKN1A, COL21A1, CTNNB1, CTSL, CTTN, DCN, DDX5, DROSHA, EGFR, EIF4B, ELK1, ERBB2, ERBB3, ERBB4, ESR1, EZR, FAS, FASLG, FGF2, FGFR1, FLNA, FLNB, FLNC, FN1, FRS2, FZD1, FZD10, FZD2, FZD3, FZD4, FZD5, FZD6, FZD7, FZD8, FZ…	FALSE
KEGG:05206	KEGG_01.03.2017	MicroRNAs in cancer	[-1]	[Group25]	13	4.34783	2.85469e-06	0.000162717	{Group25=6.1255450354991566E-18}	{Group25=9.80087205679865E-17}	[BCL2, CASP3, EGFR, GRB2, HMOX1, MAPK1, MCL1, NFKB1, PRKCA, PRKCB, PRKCE, PTGS2, TP53]	[ABCB1, ABCC1, ABL1, APC, APC2, ATM, BAK1, BCL2, BCL2L11, BCL2L2, BMF, BMI1, BMPR2, BRCA1, CASP3, CCND1, CCND2, CCNE1, CCNE2, CCNG1, CD44, CDC25A, CDC25B, CDC25C, CDCA5, CDK6, CDKN1A, CDKN1B, CDKN2A, COMMD3-BMI1, CREBBP, CRK, CRKL, CYP1B1, CYP24A1, DDIT4, DICER1, DNMT1, DNMT3A, DNMT3B, E2F1, E2F2, E2F3, EFNA3, EGFR, EP300, ERBB2, ERBB3, EZH2, EZR, FGFR3, FOXP1, FSCN1, FZD3, GLS, GLS2, GRB2, HDAC1…	FALSE
KEGG:05210	KEGG_01.03.2017	Colorectal cancer	[-1]	[Group11, Group22, Group25]	10	16.6667	1.27969e-10	1.2413e-08	{Group11=3.365147532546613E-14, Group22=1.6057462163294384E-19, Group25=6.1255450354991566E-18}	{Group11=4.711206545565258E-13, Group22=3.211492432658877E-18, Group25=9.80087205679865E-17}	[BAX, BCL2, CASP3, FOS, MAPK1, MAPK3, MAPK8, PIK3R1, SMAD3, TP53]	[AKT1, AKT2, AKT3, APC, APC2, APPL1, ARAF, AXIN1, AXIN2, BAD, BAX, BCL2, BIRC5, BRAF, CASP3, CASP9, CCND1, CTNNB1, CYCS, DCC, FOS, GSK3B, JUN, KRAS, LEF1, MAP2K1, MAPK1, MAPK10, MAPK3, MAPK8, MAPK9, MLH1, MSH2, MSH3, MSH6, MYC, PIK3CA, PIK3CB, PIK3CD, PIK3R1, PIK3R2, PIK3R3, RAC1, RAC2, RAC3, RAF1, RALGDS, RHOA, SMAD2, SMAD3, SMAD4, TCF7, TCF7L1, TCF7L2, TGFB1, TGFB2, TGFB3, TGFBR1, TGFBR2, TP53]	FALSE
KEGG:05211	KEGG_01.03.2017	Renal cell carcinoma	[-1]	[Group18, Group23, Group25]	4	6.15385	0.00303752	0.0273377	{Group18=1.7234766993344764E-7, Group23=3.9857914471622045E-9, Group25=6.1255450354991566E-18}	{Group18=1.0340860196006859E-6, Group23=3.1886331577297636E-8, Group25=9.80087205679865E-17}	[GRB2, MAPK1, MAPK3, PIK3R1]	[AKT1, AKT2, AKT3, ARAF, ARNT, ARNT2, BRAF, BUB1B-PAK6, CDC42, CREBBP, CRK, CRKL, CUL2, EGLN1, EGLN2, EGLN3, ELOB, ELOC, EP300, EPAS1, ETS1, FH, FLCN, GAB1, GRB2, HGF, HIF1A, HRAS, JUN, KRAS, MAP2K1, MAP2K2, MAPK1, MAPK3, MET, NRAS, PAK1, PAK2, PAK3, PAK4, PAK5, PAK6, PDGFB, PIK3CA, PIK3CB, PIK3CD, PIK3R1, PIK3R2, PIK3R3, PTPN11, RAC1, RAF1, RAP1A, RAP1B, RAPGEF1, RBX1, SLC2A1, SOS1, SOS2, TGFA, …	FALSE
KEGG:05212	KEGG_01.03.2017	Pancreatic cancer	[-1]	[Group09, Group10, Group25]	13	20.3125	1.06084e-14	1.21997e-12	{Group09=1.0862374578391279E-20, Group10=2.338707280735993E-19, Group25=6.1255450354991566E-18}	{Group09=2.3897224072460815E-19, Group10=4.4435438333983866E-18, Group25=9.80087205679865E-17}	[BCL2L1, CDK4, EGFR, MAPK1, MAPK3, MAPK8, NFKB1, PIK3R1, RB1, RELA, SMAD3, STAT1, TP53]	[AKT1, AKT2, AKT3, ARAF, ARHGEF6, BAD, BCL2L1, BRAF, BRCA2, CASP9, CCND1, CDC42, CDK4, CDK6, CDKN2A, CHUK, E2F1, E2F2, E2F3, EGF, EGFR, ERBB2, IKBKB, IKBKG, JAK1, KRAS, MAP2K1, MAPK1, MAPK10, MAPK3, MAPK8, MAPK9, NFKB1, PIK3CA, PIK3CB, PIK3CD, PIK3R1, PIK3R2, PIK3R3, PLD1, RAC1, RAC2, RAC3, RAD51, RAF1, RALA, RALB, RALBP1, RALGDS, RB1, RELA, SMAD2, SMAD3, SMAD4, STAT1, STAT3, TGFA, TGFB1, TGFB2, …	FALSE
KEGG:05213	KEGG_01.03.2017	Endometrial cancer	[-1]	[Group25]	6	12	5.98782e-06	0.000317354	{Group25=6.1255450354991566E-18}	{Group25=9.80087205679865E-17}	[EGFR, GRB2, MAPK1, MAPK3, PIK3R1, TP53]	[AKT1, AKT2, AKT3, APC, APC2, ARAF, AXIN1, AXIN2, BAD, BRAF, CASP9, CCND1, CDH1, CTNNA1, CTNNA2, CTNNA3, CTNNB1, EGF, EGFR, ELK1, ERBB2, FOXO3, GRB2, GSK3B, HRAS, ILK, KRAS, LEF1, MAP2K1, MAP2K2, MAPK1, MAPK3, MLH1, MYC, NRAS, PDPK1, PIK3CA, PIK3CB, PIK3CD, PIK3R1, PIK3R2, PIK3R3, PTEN, RAF1, SOS1, SOS2, TCF7, TCF7L1, TCF7L2, TP53]	FALSE
KEGG:05214	KEGG_01.03.2017	Glioma	[-1]	[Group25]	11	17.1875	9.83209e-12	1.03237e-09	{Group25=6.1255450354991566E-18}	{Group25=9.80087205679865E-17}	[CALM1, CDK4, EGFR, GRB2, MAPK1, MAPK3, PIK3R1, PRKCA, PRKCB, RB1, TP53]	[AKT1, AKT2, AKT3, ARAF, BRAF, CALM1, CALM2, CALM3, CALML3, CALML4, CALML5, CALML6, CAMK2A, CAMK2B, CAMK2D, CAMK2G, CCND1, CDK4, CDK6, CDKN1A, CDKN2A, E2F1, E2F2, E2F3, EGF, EGFR, GRB2, HRAS, IGF1, IGF1R, KRAS, MAP2K1, MAP2K2, MAPK1, MAPK3, MDM2, MTOR, NRAS, PDGFA, PDGFB, PDGFRA, PDGFRB, PIK3CA, PIK3CB, PIK3CD, PIK3R1, PIK3R2, PIK3R3, PLCG1, PLCG2, PRKCA, PRKCB, PRKCG, PTEN, RAF1, RB1, SHC1, SHC2…	FALSE
KEGG:05215	KEGG_01.03.2017	Prostate cancer	[-1]	[Group07, Group10, Group25]	11	12.6437	3.1373e-10	2.94906e-08	{Group07=1.875631249072848E-15, Group10=2.338707280735993E-19, Group25=6.1255450354991566E-18}	{Group07=2.813446873609272E-14, Group10=4.4435438333983866E-18, Group25=9.80087205679865E-17}	[BCL2, CREB1, EGFR, GRB2, MAPK1, MAPK3, NFKB1, PIK3R1, RB1, RELA, TP53]	[AKT1, AKT2, AKT3, AR, ARAF, ATF4, BAD, BCL2, BRAF, CASP9, CCND1, CCNE1, CCNE2, CDK2, CDKN1A, CDKN1B, CHUK, CREB1, CREB3, CREB3L1, CREB3L2, CREB3L3, CREB3L4, CREB5, CREBBP, CTNNB1, E2F1, E2F2, E2F3, EGF, EGFR, EP300, ERBB2, FGFR1, FGFR2, FOXO1, GRB2, GSK3B, GSTP1, HRAS, HSP90AA1, HSP90AB1, HSP90B1, IGF1, IGF1R, IKBKB, IKBKG, INS, INSRR, KLK3, KRAS, LEF1, MAP2K1, MAP2K2, MAPK1, MAPK3, MDM2, MTOR, …	FALSE
KEGG:05216	KEGG_01.03.2017	Thyroid cancer	[-1]	[Group18, Group25]	4	13.7931	0.000136983	0.0041095	{Group18=1.7234766993344764E-7, Group25=6.1255450354991566E-18}	{Group18=1.0340860196006859E-6, Group25=9.80087205679865E-17}	[MAPK1, MAPK3, PPARG, TP53]	[BRAF, CCDC6, CCND1, CDH1, CTNNB1, HRAS, KRAS, LEF1, MAP2K1, MAP2K2, MAPK1, MAPK3, MYC, NCOA4, NRAS, NTRK1, PAX8, PPARG, RET, RXRA, RXRB, RXRG, TCF7, TCF7L1, TCF7L2, TFG, TP53, TPM3, TPR]	FALSE
KEGG:05218	KEGG_01.03.2017	Melanoma	[-1]	[Group25]	7	10.1449	3.01855e-06	0.000169039	{Group25=6.1255450354991566E-18}	{Group25=9.80087205679865E-17}	[CDK4, EGFR, MAPK1, MAPK3, PIK3R1, RB1, TP53]	[AKT1, AKT2, AKT3, ARAF, BAD, BRAF, CCND1, CDH1, CDK4, CDK6, CDKN1A, CDKN2A, E2F1, E2F2, E2F3, EGF, EGFR, FGF1, FGF10, FGF11, FGF12, FGF13, FGF14, FGF16, FGF17, FGF18, FGF19, FGF2, FGF20, FGF21, FGF22, FGF23, FGF3, FGF4, FGF5, FGF6, FGF7, FGF8, FGF9, FGFR1, HGF, HRAS, IGF1, IGF1R, KRAS, MAP2K1, MAP2K2, MAPK1, MAPK3, MDM2, MET, MITF, NRAS, PDGFA, PDGFB, PDGFC, PDGFD, PDGFRA, PDGFRB, PIK3CA, PIK3CB…	FALSE
KEGG:05219	KEGG_01.03.2017	Bladder cancer	[-1]	[Group25]	7	17.0732	7.72352e-08	5.56093e-06	{Group25=6.1255450354991566E-18}	{Group25=9.80087205679865E-17}	[CDK4, CXCL8, EGFR, MAPK1, MAPK3, RB1, TP53]	[ARAF, BRAF, CCND1, CDH1, CDK4, CDKN1A, CDKN2A, CXCL8, DAPK1, DAPK2, DAPK3, E2F1, E2F2, E2F3, EGF, EGFR, ERBB2, FGFR3, HBEGF, HRAS, KRAS, MAP2K1, MAP2K2, MAPK1, MAPK3, MDM2, MMP1, MMP2, MMP9, MYC, NRAS, RAF1, RASSF1, RB1, RPS6KA5, SRC, THBS1, TP53, TYMP, UPK3A, VEGFA]	FALSE
KEGG:05220	KEGG_01.03.2017	Chronic myeloid leukemia	[-1]	[Group09, Group10, Group25]	11	15.493	3.21917e-11	3.21917e-09	{Group09=1.0862374578391279E-20, Group10=2.338707280735993E-19, Group25=6.1255450354991566E-18}	{Group09=2.3897224072460815E-19, Group10=4.4435438333983866E-18, Group25=9.80087205679865E-17}	[BCL2L1, CDK4, GRB2, MAPK1, MAPK3, NFKB1, PIK3R1, RB1, RELA, SMAD3, TP53]	[ABL1, AKT1, AKT2, AKT3, ARAF, BAD, BCL2L1, BCR, BRAF, CBL, CBLB, CBLC, CCND1, CDK4, CDK6, CDKN1A, CDKN1B, CDKN2A, CHUK, CRK, CRKL, CTBP1, CTBP2, E2F1, E2F2, E2F3, GAB2, GRB2, HDAC1, HDAC2, HRAS, IKBKB, IKBKG, KRAS, MAP2K1, MAP2K2, MAPK1, MAPK3, MDM2, MECOM, MYC, NFKB1, NFKBIA, NRAS, PIK3CA, PIK3CB, PIK3CD, PIK3R1, PIK3R2, PIK3R3, PTPN11, RAF1, RB1, RELA, RUNX1, SHC1, SHC2, SHC3, SHC4, SMAD3, SMA…	FALSE
KEGG:05221	KEGG_01.03.2017	Acute myeloid leukemia	[-1]	[Group21, Group25]	6	10.9091	1.05328e-05	0.000516107	{Group21=3.0946781157773867E-27, Group25=6.1255450354991566E-18}	{Group21=7.427227477865728E-26, Group25=9.80087205679865E-17}	[GRB2, MAPK1, MAPK3, NFKB1, PIK3R1, RELA]	[AKT1, AKT2, AKT3, ARAF, BAD, BRAF, CCNA1, CCND1, CEBPA, CHUK, EIF4EBP1, FLT3, GRB2, HRAS, IKBKB, IKBKG, JUP, KIT, KRAS, LEF1, MAP2K1, MAP2K2, MAPK1, MAPK3, MTOR, MYC, NFKB1, NRAS, PIK3CA, PIK3CB, PIK3CD, PIK3R1, PIK3R2, PIK3R3, PIM1, PIM2, PML, PPARD, RAF1, RARA, RELA, RPS6KB1, RPS6KB2, RUNX1, RUNX1T1, SOS1, SOS2, SPI1, STAT3, STAT5A, STAT5B, TCF7, TCF7L1, TCF7L2, ZBTB16]	FALSE
KEGG:05222	KEGG_01.03.2017	Small cell lung cancer	[-1]	[Group05, Group10, Group25]	10	11.9048	3.93626e-09	3.38518e-07	{Group05=2.873685862761464E-18, Group10=2.338707280735993E-19, Group25=6.1255450354991566E-18}	{Group05=5.172634552970635E-17, Group10=4.4435438333983866E-18, Group25=9.80087205679865E-17}	[BCL2, BCL2L1, CDK4, NFKB1, NOS2, PIK3R1, PTGS2, RB1, RELA, TP53]	[AKT1, AKT2, AKT3, APAF1, BCL2, BCL2L1, BIRC2, BIRC3, BIRC7, BIRC8, CASP9, CCND1, CCNE1, CCNE2, CDK2, CDK4, CDK6, CDKN1B, CDKN2B, CHUK, CKS1B, CKS2, COL4A1, COL4A2, COL4A3, COL4A4, COL4A5, COL4A6, CYCS, E2F1, E2F2, E2F3, FHIT, FN1, IKBKB, IKBKG, ITGA2, ITGA2B, ITGA3, ITGA6, ITGAV, ITGB1, LAMA1, LAMA2, LAMA3, LAMA4, LAMA5, LAMB1, LAMB2, LAMB3, LAMB4, LAMC1, LAMC2, LAMC3, MAX, MYC, NFKB1, NFKBIA, N…	FALSE
KEGG:05223	KEGG_01.03.2017	Non-small cell lung cancer	[-1]	[Group25]	10	18.5185	4.24273e-11	4.2003e-09	{Group25=6.1255450354991566E-18}	{Group25=9.80087205679865E-17}	[CDK4, EGFR, GRB2, MAPK1, MAPK3, PIK3R1, PRKCA, PRKCB, RB1, TP53]	[AKT1, AKT2, AKT3, ALK, ARAF, BAD, BRAF, CASP9, CCND1, CDK4, CDK6, CDKN2A, E2F1, E2F2, E2F3, EGF, EGFR, EML4, ERBB2, FHIT, FOXO3, GRB2, HRAS, KRAS, MAP2K1, MAP2K2, MAPK1, MAPK3, NRAS, PDPK1, PIK3CA, PIK3CB, PIK3CD, PIK3R1, PIK3R2, PIK3R3, PLCG1, PLCG2, PRKCA, PRKCB, PRKCG, RAF1, RARB, RASSF1, RASSF5, RB1, RXRA, RXRB, RXRG, SOS1, SOS2, STK4, TGFA, TP53]	FALSE
KEGG:05224	KEGG_01.03.2017	Breast cancer	[-1]	[Group25]	9	6.25	6.39825e-06	0.000332709	{Group25=6.1255450354991566E-18}	{Group25=9.80087205679865E-17}	[CDK4, EGFR, FOS, GRB2, MAPK1, MAPK3, PIK3R1, RB1, TP53]	[AKT1, AKT2, AKT3, APC, APC2, ARAF, AXIN1, AXIN2, BRAF, BRCA1, BRCA2, CCND1, CDK4, CDK6, CDKN1A, CSNK1A1, CSNK1A1L, CTNNB1, DLL1, DLL3, DLL4, DVL1, DVL2, DVL3, E2F1, E2F2, E2F3, EGF, EGFR, ERBB2, ESR1, ESR2, FGF1, FGF10, FGF11, FGF12, FGF13, FGF14, FGF16, FGF17, FGF18, FGF19, FGF2, FGF20, FGF21, FGF22, FGF23, FGF3, FGF4, FGF5, FGF6, FGF7, FGF8, FGF9, FGFR1, FLT4, FOS, FRAT1, FRAT2, FZD1, FZD10, F…	FALSE
KEGG:05230	KEGG_01.03.2017	Central carbon metabolism in cancer	[-1]	[Group25]	6	9.23077	2.79019e-05	0.00119978	{Group25=6.1255450354991566E-18}	{Group25=9.80087205679865E-17}	[EGFR, G6PD, MAPK1, MAPK3, PIK3R1, TP53]	[AKT1, AKT2, AKT3, EGFR, ERBB2, FGFR1, FGFR2, FGFR3, FLT3, G6PD, GCK, GLS, GLS2, HIF1A, HK1, HK2, HK3, HKDC1, HRAS, IDH1, KIT, KRAS, LDHA, MAP2K1, MAP2K2, MAPK1, MAPK3, MET, MTOR, MYC, NRAS, NTRK1, NTRK3, PDGFRA, PDGFRB, PDHA1, PDHA2, PDHB, PDK1, PFKL, PFKM, PFKP, PGAM1, PGAM2, PGAM4, PIK3CA, PIK3CB, PIK3CD, PIK3R1, PIK3R2, PIK3R3, PKM, PTEN, RAF1, RET, SCO2, SIRT3, SIRT6, SLC16A3, SLC1A5, SLC2A1…	FALSE
KEGG:05231	KEGG_01.03.2017	Choline metabolism in cancer	[-1]	[Group24, Group25]	10	10.101	1.99139e-08	1.55329e-06	{Group24=1.6198446768028198E-23, Group25=6.1255450354991566E-18}	{Group24=3.7256427566464854E-22, Group25=9.80087205679865E-17}	[EGFR, FOS, GRB2, MAPK1, MAPK3, MAPK8, PIK3R1, PLA2G4A, PRKCA, PRKCB]	[AKT1, AKT2, AKT3, CHKA, CHKB, CHPT1, DGKA, DGKB, DGKD, DGKE, DGKG, DGKH, DGKI, DGKK, DGKQ, DGKZ, EGF, EGFR, EIF4EBP1, FOS, GPCPD1, GRB2, HIF1A, HRAS, JMJD7-PLA2G4B, JUN, KRAS, LYPLA1, MAP2K1, MAP2K2, MAPK1, MAPK10, MAPK3, MAPK8, MAPK9, MTOR, NRAS, PCYT1A, PCYT1B, PDGFA, PDGFB, PDGFC, PDGFD, PDGFRA, PDGFRB, PDPK1, PIK3CA, PIK3CB, PIK3CD, PIK3R1, PIK3R2, PIK3R3, PIP5K1A, PIP5K1B, PIP5K1C, PLA2G4A,…	FALSE
KEGG:05310	KEGG_01.03.2017	Asthma	[-1]	[Group12, Group25]	4	12.9032	0.00017895	0.00483166	{Group12=4.205725438240467E-13, Group25=6.1255450354991566E-18}	{Group12=5.04687052588856E-12, Group25=9.80087205679865E-17}	[CD40LG, IL10, IL4, TNF]	[CCL11, CD40, CD40LG, EPX, FCER1A, FCER1G, HLA-DMA, HLA-DMB, HLA-DOA, HLA-DOB, HLA-DPA1, HLA-DPB1, HLA-DQA1, HLA-DQA2, HLA-DQB1, HLA-DRA, HLA-DRB1, HLA-DRB3, HLA-DRB4, HLA-DRB5, IL10, IL13, IL3, IL4, IL5, IL9, LOC102723407, MS4A2, PRG2, RNASE3, TNF]	FALSE
KEGG:05320	KEGG_01.03.2017	Autoimmune thyroid disease	[-1]	[Group12, Group25]	4	7.54717	0.00142818	0.0199945	{Group12=4.205725438240467E-13, Group25=6.1255450354991566E-18}	{Group12=5.04687052588856E-12, Group25=9.80087205679865E-17}	[CD40LG, IL10, IL2, IL4]	[CD28, CD40, CD40LG, CD80, CD86, CGA, CTLA4, FAS, FASLG, GZMB, HLA-A, HLA-B, HLA-C, HLA-DMA, HLA-DMB, HLA-DOA, HLA-DOB, HLA-DPA1, HLA-DPB1, HLA-DQA1, HLA-DQA2, HLA-DQB1, HLA-DRA, HLA-DRB1, HLA-DRB3, HLA-DRB4, HLA-DRB5, HLA-E, HLA-F, HLA-G, IFNA1, IFNA10, IFNA13, IFNA14, IFNA16, IFNA17, IFNA2, IFNA21, IFNA4, IFNA5, IFNA6, IFNA7, IFNA8, IL10, IL2, IL4, IL5, LOC102723407, PRF1, TG, TPO, TSHB, TSHR]	FALSE
KEGG:05323	KEGG_01.03.2017	Rheumatoid arthritis	[-1]	[Group16, Group25]	10	11.1111	7.80732e-09	6.63622e-07	{Group16=6.693331547348122E-20, Group25=6.1255450354991566E-18}	{Group16=1.4055996249431058E-18, Group25=9.80087205679865E-17}	[CCL2, CSF2, CXCL8, FOS, ICAM1, IFNG, IL1A, IL1B, IL6, TNF]	[ACP5, ANGPT1, ATP6AP1, ATP6V0A1, ATP6V0A2, ATP6V0A4, ATP6V0B, ATP6V0C, ATP6V0D1, ATP6V0D2, ATP6V0E1, ATP6V0E2, ATP6V1A, ATP6V1B1, ATP6V1B2, ATP6V1C1, ATP6V1C2, ATP6V1D, ATP6V1E1, ATP6V1E2, ATP6V1F, ATP6V1G1, ATP6V1G2, ATP6V1G3, ATP6V1H, CCL2, CCL20, CCL3, CCL3L1, CCL3L3, CCL5, CD28, CD80, CD86, CSF1, CSF2, CTLA4, CTSK, CTSL, CXCL1, CXCL12, CXCL5, CXCL6, CXCL8, FLT1, FOS, HLA-DMA, HLA-DMB, HLA-DO…	FALSE
KEGG:05330	KEGG_01.03.2017	Allograft rejection	[-1]	[Group12, Group21, Group25]	6	15.7895	1.13537e-06	7.15283e-05	{Group12=4.205725438240467E-13, Group21=3.0946781157773867E-27, Group25=6.1255450354991566E-18}	{Group12=5.04687052588856E-12, Group21=7.427227477865728E-26, Group25=9.80087205679865E-17}	[CD40LG, IFNG, IL10, IL2, IL4, TNF]	[CD28, CD40, CD40LG, CD80, CD86, FAS, FASLG, GZMB, HLA-A, HLA-B, HLA-C, HLA-DMA, HLA-DMB, HLA-DOA, HLA-DOB, HLA-DPA1, HLA-DPB1, HLA-DQA1, HLA-DQA2, HLA-DQB1, HLA-DRA, HLA-DRB1, HLA-DRB3, HLA-DRB4, HLA-DRB5, HLA-E, HLA-F, HLA-G, IFNG, IL10, IL12A, IL12B, IL2, IL4, IL5, LOC102723407, PRF1, TNF]	FALSE
KEGG:05332	KEGG_01.03.2017	Graft-versus-host disease	[-1]	[Group25]	6	14.6341	1.80919e-06	0.00011217	{Group25=6.1255450354991566E-18}	{Group25=9.80087205679865E-17}	[IFNG, IL1A, IL1B, IL2, IL6, TNF]	[CD28, CD80, CD86, FAS, FASLG, GZMB, HLA-A, HLA-B, HLA-C, HLA-DMA, HLA-DMB, HLA-DOA, HLA-DOB, HLA-DPA1, HLA-DPB1, HLA-DQA1, HLA-DQA2, HLA-DQB1, HLA-DRA, HLA-DRB1, HLA-DRB3, HLA-DRB4, HLA-DRB5, HLA-E, HLA-F, HLA-G, IFNG, IL1A, IL1B, IL2, IL6, KIR2DL1, KIR2DL2, KIR2DL3, KIR2DL5A, KIR3DL1, KIR3DL2, KLRC1, KLRD1, PRF1, TNF]	FALSE
